# Supplementary material for: Structural insight into cocrystallization with zwitterionic co-formers: cocrystals of S-naproxen
Source: Royal Society of Chemistry journal article supplement (doi:10.1039/c4ce00353e), 2014-05-13
Supplement: c4ce00353e1.dat [file c4ce00353e1.dat]

        0.23560000     6.779287096093968        0.9907424022123789    
        0.23940000     6.734617443775719        0.1768735093004410    
        0.24320000     6.785318395106500        0.1814823856023402    
        0.24700000     6.914424171924455        0.1875323621650479    
        0.25080000     6.681696188113674        0.1900151707518325    
        0.25460000     6.823171280102808        0.1910060064363830    
        0.25840000     7.514599454764781        0.2030032673160784    
        0.26220000     9.199593718612036        0.3255291695714144    
        0.26600000     16.88388094208199        0.5632200415730524    
        0.26980000     33.91837964106659        0.8673541904023124    
        0.27360000     59.76984206383967         1.229603251558514    
        0.27740000     94.88083900454592         1.445045842850369    
        0.28120000     129.1719863488689         1.592202129105708    
        0.28500000     161.5831541860697         1.712191297359638    
        0.28880000     196.1593141235580         1.865221412721640    
        0.29260000     227.4210242844440         1.909874651182454    
        0.29640000     259.0789107866281         2.042073755477237    
        0.30020000     288.1064539693838         2.120180105468718    
        0.30400000     317.8853002507941         2.238291619320797    
        0.30780000     346.3916949479118         2.170351601302639    
        0.31160000     375.2077183742920         2.361519708448240    
        0.31540000     404.1406233719050         2.511199594065143    
        0.31920000     432.8858789158498         2.046132021630996    
        0.32300000     453.3846350243988         2.618794466286423    
        0.32680000     481.6277434681610         2.452249769972184    
        0.33060000     506.0542965464184         2.602778785630634    
        0.33440000     532.4116441264738         2.588852764058765    
        0.33820000     556.6878310133029         2.578911021794466    
        0.34200000     579.1524160170489         2.573370488357288    
        0.34580000     599.8787435433396         2.598668551348489    
        0.34960000     622.1195532669609         2.843777481658851    
        0.35340000     645.2667286463425         2.622261826462270    
        0.35720000     667.2887489380353         3.018725749242372    
        0.36100000     691.8120632431990         2.727759401141776    
        0.36480000     710.6015444875245         2.635956775343732    
        0.36860000     729.6876095434226         2.999437603523720    
        0.37240000     750.1504226477839         2.785015718854497    
        0.37620000     768.9946524525272         2.963548835650452    
        0.38000000     784.4498797607661         2.854654980874460    
        0.38380000     800.9073383453431         3.439022405312649    
        0.38760000     824.6878291538949         2.967689773741957    
        0.39140000     841.8846354356438         3.021656085883579    
        0.39520000     862.5110434272805         3.092080023766439    
        0.39900000     880.1754754884323         3.131650170172884    
        0.40280000     893.6851779024155         3.163646123829475    
        0.40660000     907.3623739526332         3.209183152422264    
        0.41040000     929.0573399894623         3.601709229877306    
        0.41420000     945.1710263428715         3.283855723360891    
        0.41800000     955.6717197838819         3.304784141963706    
        0.42180000     971.6811126999655         3.361665112260075    
        0.42560000     988.5298256359362         3.424760328396210    
        0.42940000     1003.917799850519         3.416233494485320    
        0.43320000     1019.169034857800         3.436782030656611    
        0.43700000     1033.507870510031         3.494835214876844    
        0.44080000     1042.424937899118         3.511422837379066    
        0.44460000     1055.397544933597         3.576372136433978    
        0.44840000     1069.850224096451         3.623754168304012    
        0.45220000     1081.851338833354         3.672643143213617    
        0.45600000     1097.747311687604         3.726269410404528    
        0.45980000     1117.308912277785         3.762002900708616    
        0.46360000     1124.584323616483         3.800412667209491    
        0.46740000     1128.151221883978         3.744649986035563    
        0.47120000     1141.634615507462         3.737916228467090    
        0.47500000     1155.595836992681         3.811035341304323    
        0.47880000     1166.069088071345         3.886001166397394    
        0.48260000     1178.873300734774         3.918850614413653    
        0.48640000     1192.618129477801         3.975364403478218    
        0.49020000     1202.685864961139         3.976853781395691    
        0.49400000     1210.969499894811         3.996645525370371    
        0.49780000     1220.220167655613         4.045832135160382    
        0.50160000     1227.737283121375         4.013882738102053    
        0.50540000     1243.024241767775         4.034399413602048    
        0.50920000     1255.569539455136         4.105624954506646    
        0.51300000     1267.225939099305         4.102042929269331    
        0.51680000     1275.756469684862         4.187051195449962    
        0.52060000     1282.930446248286         4.194095808629827    
        0.52440000     1292.597820050029         4.191411224349038    
        0.52820000     1298.914628020091         4.192896744343260    
        0.53200000     1311.950689677748         4.222763804575666    
        0.53580000     1322.518276552136         4.290703522947143    
        0.53960000     1358.654346540868         4.359130640331569    
        0.54340000     1356.846032134189         3.851074238268678    
        0.54720000     1369.158097460227         4.125563213468483    
        0.55100000     1376.906151501601         3.684519061885663    
        0.55480000     1384.099699992456         3.314379928838092    
        0.55860000     1390.450059230106         3.393158982463565    
        0.56240000     1398.329101268454         3.427978317865858    
        0.56620000     1402.645722332668         3.644859865160488    
        0.57000000     1411.725488900127         3.179577666669747    
        0.57380000     1422.707223466180         3.199052984506361    
        0.57760000     1425.632582906618         3.696972457594646    
        0.58140000     1440.827921826176         4.177452559073129    
        0.58520000     1447.745036280277         3.874073283340022    
        0.58900000     1452.285821589915         3.928076182461945    
        0.59280000     1466.937504016099         3.680273762289084    
        0.59660000     1477.824334252467         4.011114964769913    
        0.60040000     1476.049004215255         3.751004558478331    
        0.60420000     1486.701902997866         4.009810441303060    
        0.60800000     1495.144764605570         4.255158592625767    
        0.61180000     1499.159566275130         4.109185131782856    
        0.61560000     1512.002829535333         4.103045377727190    
        0.61940000     1522.687996737681         4.267499234699881    
        0.62320000     1523.241323053859         3.972670721774002    
        0.62700000     1534.493435913053         4.229660602749970    
        0.63080000     1542.179744652785         4.053360287835979    
        0.63460000     1553.158755494486         4.175882687566310    
        0.63840000     1555.460906210740         4.341987997038609    
        0.64220000     1558.695943737535         4.473341051967907    
        0.64600000     1567.911804403633         4.387855738764359    
        0.64980000     1576.085205466221         4.412641714628130    
        0.65360000     1579.029515889517         4.731769863498777    
        0.65740000     1587.824857438123         4.534855268779216    
        0.66120000     1596.317927209208         4.633865023438956    
        0.66500000     1596.916270412674         4.627251668021902    
        0.66880000     1603.928516262100         4.477922449417379    
        0.67260000     1616.452530141523         4.396547827078228    
        0.67640000     1625.293845175329         4.711653389667909    
        0.68020000     1623.878183210921         4.719766310053098    
        0.68400000     1630.726980122370         4.415202867908449    
        0.68780000     1639.292556145357         4.772002977131964    
        0.69160000     1643.520908759451         4.673070338379740    
        0.69540000     1653.574793113883         4.755819523838882    
        0.69920000     1661.970548139277         4.810132105731369    
        0.70300000     1665.747830055951         4.703906112697640    
        0.70680000     1668.954571388882         4.435861349401425    
        0.71060000     1677.470247436363         5.069811070690299    
        0.71440000     1681.384649804756         4.924696054471317    
        0.71820000     1683.959199288035         4.682363584217099    
        0.72200000     1690.978830209113         4.805484023383989    
        0.72580000     1696.562906816777         4.850906183669649    
        0.72960000     1704.017977746972         4.897042451147732    
        0.73340000     1709.692561573509         4.798442274559276    
        0.73720000     1714.530796082261         4.676594954125046    
        0.74100000     1719.561604895147         4.419408946308509    
        0.74480000     1724.574090646775         4.664316675638765    
        0.74860000     1726.323379958688         4.577172821068441    
        0.75240000     1734.026503340999         4.601837294062549    
        0.75620000     1739.750921093391         4.709293494526469    
        0.76000000     1748.730614617247         4.989347243392126    
        0.76380000     1750.456138697140         4.903391808705488    
        0.76760000     1750.319201046869         4.569964349258441    
        0.77140000     1758.099778773862         4.356310004371103    
        0.77520000     1764.250657210048         4.702140541408537    
        0.77900000     1765.620189293131         4.766964923682364    
        0.78280000     1768.204299092021         4.438958023101118    
        0.78660000     1781.597042897080         4.517385582110178    
        0.79040000     1783.074023817917         4.486620661668075    
        0.79420000     1788.829792254025         4.514681788241107    
        0.79800000     1785.909158418459         4.225514451384670    
        0.80180000     1797.919579407990         4.231465892410256    
        0.80560000     1801.397440128611         4.250690386952093    
        0.80940000     1806.828052068815         4.249562356765876    
        0.81320000     1812.129949187919         4.780598415871353    
        0.81700000     1812.957163920500         4.548405391111457    
        0.82080000     1816.076102605794         4.300865475734651    
        0.82460000     1825.092820437682         4.326468436663932    
        0.82840000     1826.252390727423         4.188001336587313    
        0.83220000     1832.920749278984         4.498582738937713    
        0.83600000     1835.842489051057         4.685797655279485    
        0.83980000     1854.571930277558         5.059215788443061    
        0.84360000     1882.812253060161         5.375999279295039    
        0.84740000     1881.608344952660         4.990128949766497    
        0.85120000     1890.736557441410         5.047985030606045    
        0.85500000     1897.383739241276         4.822052799231950    
        0.85880000     1896.737373511169         4.483351843071933    
        0.86260000     1901.678273440283         4.626080639154972    
        0.86640000     1907.052266211829         4.494674582028898    
        0.87020000     1911.290407154549         4.475969613434342    
        0.87400000     1920.321718580633         4.155230378627916    
        0.87780000     1921.192039427495         4.304968724704231    
        0.88160000     1931.225897841696         4.617929922511231    
        0.88540000     1941.590347817915         4.636421928577296    
        0.88920000     1941.675058221698         4.628753012306375    
        0.89300000     1957.987627942007         4.280334907449505    
        0.89680000     1961.525646144756         4.630157442322504    
        0.90060000     1967.319277813014         4.627672855546785    
        0.90440000     1969.677578524770         4.184444090596565    
        0.90820000     1974.895074942269         4.503267480354286    
        0.91200000     1983.335236537354         4.714347541101010    
        0.91580000     1989.495851995326         4.659996076814849    
        0.91960000     1997.225016492002         4.810809531143313    
        0.92340000     2006.014660956137         4.924001017191975    
        0.92720000     2004.614630616088         4.877526799655030    
        0.93100000     2017.447824471401         4.774200812935198    
        0.93480000     2019.228066819643         4.932969944173839    
        0.93860000     2028.491250544547         5.072671078793827    
        0.94240000     2032.393141253558         4.881830604498722    
        0.94620000     2038.845757349133         4.796370889404804    
        0.95000000     2043.246563609755         4.859330944162472    
        0.95380000     2048.222306920204         4.728959388996024    
        0.95760000     2052.996668011977         4.823779640748411    
        0.96140000     2058.678399546254         4.859229264933644    
        0.96520000     2063.820601053349         4.851435006065130    
        0.96900000     2066.836788451266         4.694238459903033    
        0.97280000     2071.295659333031         4.613323930518805    
        0.97660000     2076.881546118952         4.599054443964495    
        0.98040000     2079.720214664193         5.018036028545399    
        0.98420000     2086.807828298854         4.839058532456459    
        0.98800000     2088.560413971592         4.658804540534940    
        0.99180000     2095.001116218029         4.951133287989101    
        0.99560000     2101.783511439057         4.917860618791030    
        0.99940000     2113.070918546045         5.016527753591982    
        1.00320000     2116.649641600210         5.177920829625800    
        1.00700000     2116.833806289968         4.803221351546203    
        1.01080000     2117.982161268721         4.804233865033007    
        1.01460000     2122.775293524480         4.821162953203786    
        1.01840000     2126.708463956184         4.796516479189956    
        1.02220000     2132.019158230391         4.555342866097539    
        1.02600000     2135.698783030940         4.893440988951707    
        1.02980000     2142.368563457374         4.894448606864970    
        1.03360000     2147.706581641871         4.729328888789166    
        1.03740000     2147.664078657514         4.737006471724992    
        1.04120000     2148.688444020255         4.688216844350469    
        1.04500000     2154.292836340916         4.456826312173383    
        1.04880000     2160.165001444414         4.494298978534725    
        1.05260000     2161.795291131469         4.470506936324202    
        1.05640000     2164.184892468481         4.567666366695787    
        1.06020000     2169.146897784114         4.674087044587286    
        1.06400000     2175.630506878416         4.866998541723739    
        1.06780000     2175.505671349591         4.792799538702705    
        1.07160000     2178.328534598209         4.391661629679632    
        1.07540000     2184.108753728805         4.384764214844075    
        1.07920000     2188.883946205511         4.447799660612370    
        1.08300000     2188.103297336726         4.297370099141456    
        1.08680000     2193.145428311379         4.397449239836540    
        1.09060000     2194.864194733906         4.504521104629895    
        1.09440000     2200.214297437312         4.384188718388836    
        1.09820000     2202.920267601242         4.314970127614687    
        1.10200000     2207.051014523320         4.067580477455738    
        1.10580000     2213.240185639857         4.176762622790936    
        1.10960000     2222.729010905103         4.211903203821522    
        1.11340000     2228.467503591626         4.520980194108017    
        1.11720000     2227.711807671646         4.427668471149802    
        1.12100000     2228.480563356922         4.142876984446579    
        1.12480000     2229.807254795037         4.141820920462056    
        1.12860000     2233.377022446812         4.344808435536111    
        1.13240000     2240.422424959290         3.969344039000995    
        1.13620000     2244.287175347819         4.611958739461042    
        1.14000000     2279.240557956730         5.404675284179678    
        1.14380000     2282.198674388701         5.080688966932315    
        1.14760000     2290.164651457900         5.106194418884725    
        1.15140000     2288.792928274886         4.993733580900932    
        1.15520000     2285.994050922326         4.714635726228967    
        1.15900000     2292.238930517920         4.646301620387923    
        1.16280000     2302.855146707267         4.676356474469133    
        1.16660000     2297.595110073189         4.508355748245806    
        1.17040000     2303.440791435001         4.414006997152677    
        1.17420000     2318.742328429058         4.268217949729527    
        1.17800000     2334.771912313654         4.378938888021035    
        1.18180000     2342.627002227608         4.686922210512199    
        1.18560000     2359.203728913235         4.626465508211424    
        1.18940000     2375.769385236878         4.735177266192687    
        1.19320000     2403.171927189278         4.764822358311255    
        1.19700000     2427.669679601279         4.932592677345649    
        1.20080000     2452.713974813274         4.575890667143558    
        1.20460000     2474.719935479263         4.716354469695291    
        1.20840000     2506.219980093218         4.959377647631424    
        1.21220000     2535.052204809291         4.977685527776091    
        1.21600000     2560.235421815476         5.189819661284840    
        1.21980000     2576.779279257177         5.402663573566469    
        1.22360000     2588.864071997376         4.947185281618032    
        1.22740000     2590.398241278248         4.896799642154493    
        1.23120000     2585.511795154185         4.952634019890510    
        1.23500000     2570.068385729177         5.192259383938062    
        1.23880000     2550.676816954314         5.028888429738780    
        1.24260000     2519.644428711468         4.702075407222335    
        1.24640000     2490.192607820400         4.826299165094948    
        1.25020000     2462.662107868487         4.785486173039030    
        1.25400000     2433.912144110952         4.622166900516519    
        1.25780000     2412.125516551660         4.621369548135643    
        1.26160000     2394.901422405110         4.748957207680722    
        1.26540000     2375.594717756122         4.760473855188852    
        1.26920000     2365.503327654659         4.354724413654782    
        1.27300000     2360.573188940428         4.417275019863030    
        1.27680000     2357.187164414898         4.533393103333980    
        1.28060000     2351.330168790476         4.464085420463405    
        1.28440000     2347.757359074232         4.463072333636046    
        1.28820000     2352.442981331742         4.441349143506524    
        1.29200000     2348.829999105423         4.319567623441841    
        1.29580000     2352.025801616793         4.527149299253026    
        1.29960000     2356.772900856719         4.467847158191995    
        1.30340000     2353.996487100083         4.453213760612214    
        1.30720000     2353.634032128140         4.329943678131355    
        1.31100000     2350.111693699362         4.505994691921104    
        1.31480000     2350.843444812157         4.357458151401343    
        1.31860000     2352.758874287744         4.113211479644047    
        1.32240000     2352.927722527139         4.186591482750462    
        1.32620000     2352.490833285748         4.456909820120662    
        1.33000000     2356.985686298987         4.285204970078949    
        1.33380000     2358.498501955578         4.384399253806946    
        1.33760000     2360.049595232079         4.382676684397888    
        1.34140000     2357.696469383744         4.290110378454941    
        1.34520000     2361.951503777416         4.069539183304914    
        1.34900000     2363.910762699451         4.107665888070106    
        1.35280000     2365.443998134487         4.123129931821075    
        1.35660000     2363.197732498566         4.262410535592737    
        1.36040000     2367.055518721713         4.327501844925488    
        1.36420000     2369.530291831002         4.313090686896780    
        1.36800000     2367.003156085936         4.043472253166643    
        1.37180000     2369.126997384192         3.878235251277088    
        1.37560000     2376.170615880771         3.812441024443066    
        1.37940000     2373.858983314527         4.063770779596287    
        1.38320000     2370.672751532966         4.025841100343540    
        1.38700000     2373.814255142513         3.928163964203947    
        1.39080000     2373.834098462311         3.815723345570204    
        1.39460000     2378.702686142748         3.849786143438212    
        1.39840000     2375.559477074408         3.674223755566803    
        1.40220000     2379.638570769060         3.829211911527770    
        1.40600000     2384.481132467552         3.734514649393091    
        1.40980000     2386.430888458879         3.745138857096079    
        1.41360000     2388.269572098062         4.016370195571129    
        1.41740000     2387.374994332106         3.500286506222479    
        1.42120000     2388.727904195472         3.512597908988396    
        1.42500000     2391.240449965382         3.866145116260487    
        1.42880000     2387.236163665912         3.633531017534028    
        1.43260000     2390.571819943170         3.773308851741080    
        1.43640000     2394.302871195490         3.772132271863721    
        1.44020000     2395.548477707856         3.603587048149946    
        1.44400000     2398.267038071568         3.533379366072174    
        1.44780000     2400.946336465269         3.527525511651031    
        1.45160000     2401.556011249345         3.529146136155651    
        1.45540000     2400.771260169805         3.614404901557579    
        1.45920000     2401.458187776660         3.703366224020253    
        1.46300000     2405.240835531132         3.543157783420511    
        1.46680000     2405.705177482585         3.514967633616187    
        1.47060000     2409.253493082575         3.525871364445606    
        1.47440000     2411.609315304105         3.554784825054472    
        1.47820000     2410.525349676346         3.523207470701188    
        1.48200000     2404.911129734584         3.519948414857478    
        1.48580000     2410.475747281116         3.525253471771620    
        1.48960000     2410.481655188408         3.536051272109908    
        1.49340000     2411.055457467402         3.532850696603671    
        1.49720000     2413.526510198897         3.518100722591506    
        1.50100000     2418.274538806375         3.544847251767631    
        1.50480000     2417.557755966874         3.547448574008342    
        1.50860000     2413.704229240777         3.529841464325152    
        1.51240000     2419.568264051449         3.545628011241032    
        1.51620000     2421.018310522726         3.539051900063301    
        1.52000000     2417.025785525206         3.542263581776416    
        1.52380000     2422.902713419985         3.558090807242763    
        1.52760000     2422.613029148883         3.586215505683209    
        1.53140000     2423.698345516990         3.540219345545461    
        1.53520000     2419.099368423816         3.532489713619745    
        1.53900000     2422.992671364831         3.578256164738192    
        1.54280000     2420.558669265198         3.541565909369144    
        1.54660000     2427.997234228598         3.586861409979632    
        1.55040000     2424.196760474063         3.588472135414832    
        1.55420000     2427.424515620038         3.560083160424340    
        1.55800000     2424.823779297670         3.543466980909950    
        1.56180000     2426.796829821549         3.554627891202151    
        1.56560000     2419.791458903690         3.553887319614784    
        1.56940000     2429.705607356572         3.542430258849932    
        1.57320000     2430.257415438641         3.557902058917817    
        1.57700000     2427.390832450954         3.562381682894805    
        1.58080000     2423.536386250620         3.575436357156215    
        1.58460000     2428.978897043108         3.572263098279257    
        1.58840000     2428.229366098423         3.565193211846394    
        1.59220000     2430.604364148772         3.568166094735802    
        1.59600000     2428.399642381278         3.565841849054209    
        1.59980000     2436.564935420437         3.562542845177580    
        1.60360000     2434.486709054853         3.551537053004255    
        1.60740000     2432.428031980549         3.583631796519346    
        1.61120000     2432.181626419272         3.583005526451324    
        1.61500000     2436.642435101293         3.571196131420609    
        1.61880000     2433.717711050811         3.590290785345893    
        1.62260000     2434.386961233164         3.560458443748791    
        1.62640000     2431.768093066386         3.541464828692350    
        1.63020000     2435.444905750150         3.579383721367265    
        1.63400000     2437.706591428555         3.596746368634297    
        1.63780000     2438.646648335162         3.577637096829335    
        1.64160000     2435.914359230565         3.583318396988179    
        1.64540000     2438.231619706688         3.578585584562183    
        1.64920000     2438.122647651925         3.586075365202350    
        1.65300000     2437.816407654354         3.586882231854852    
        1.65680000     2440.110274391660         3.566221117186781    
        1.66060000     2435.590667835907         3.560935070463505    
        1.66440000     2436.981742491561         3.557859614061772    
        1.66820000     2442.210242529509         3.594805365226524    
        1.67200000     2442.590184111937         3.584305540173215    
        1.67580000     2443.378904609445         3.586491935279346    
        1.67960000     2439.238673864008         3.566505419402852    
        1.68340000     2439.323442389557         3.572394790266114    
        1.68720000     2441.823675237773         3.574365680956310    
        1.69100000     2443.244633271307         3.572104073849650    
        1.69480000     2444.377564568966         3.552395162130564    
        1.69860000     2444.940503900486         3.564897450512388    
        1.70240000     2445.130929040411         3.575010128819656    
        1.70620000     2448.615431552535         3.579617842224392    
        1.71000000     2449.093688703503         3.565475958605971    
        1.71380000     2448.549302083663         3.571655098459935    
        1.71760000     2450.738824544694         3.566937738612034    
        1.72140000     2448.446221164935         3.593043946122162    
        1.72520000     2449.526070253357         3.603391225745924    
        1.72900000     2448.785182974382         3.578725990847329    
        1.73280000     2451.226196891766         3.581696756739571    
        1.73660000     2452.506849121925         3.572381469007260    
        1.74040000     2452.738435971653         3.576844004951199    
        1.74420000     2452.649622659195         3.594650151514400    
        1.74800000     2456.180775558284         3.597594557069395    
        1.75180000     2454.809634037194         3.607347617753130    
        1.75560000     2454.030131526250         3.575461116204345    
        1.75940000     2452.711664621933         3.578324005933177    
        1.76320000     2455.006388791125         3.591189211421867    
        1.76700000     2458.627731971981         3.593395983097588    
        1.77080000     2457.840257489729         3.589852084121562    
        1.77460000     2456.798919909170         3.593460414640248    
        1.77840000     2458.073554158528         3.589353716316443    
        1.78220000     2456.048796967182         3.574662794896233    
        1.78600000     2457.895400953758         3.573420248024652    
        1.78980000     2457.956399958759         3.573034005705850    
        1.79360000     2462.365500402433         3.596194947861737    
        1.79740000     2458.951190320381         3.596515425835340    
        1.80120000     2461.498237776324         3.601439768466916    
        1.80500000     2462.210984326120         3.610901988648730    
        1.80880000     2460.546716032327         3.574396925145954    
        1.81260000     2463.476166571771         3.574877594839073    
        1.81640000     2463.864845642685         3.597040241345014    
        1.82020000     2464.374072095003         3.607926762717435    
        1.82400000     2463.670050322822         3.597004249923312    
        1.82780000     2465.740305777283         3.609759942744521    
        1.83160000     2467.834088102166         3.583472317829390    
        1.83540000     2468.554780657587         3.586318293165283    
        1.83920000     2470.208613859415         3.619696006747009    
        1.84300000     2467.209062699499         3.621107573828550    
        1.84680000     2466.082243058016         3.592750247703897    
        1.85060000     2465.697563439845         3.620321405280412    
        1.85440000     2472.478999263334         3.626020602525666    
        1.85820000     2470.077317872989         3.592683427141155    
        1.86200000     2471.485641846560         3.612405529583021    
        1.86580000     2472.017162035611         3.607692513988487    
        1.86960000     2470.269864112687         3.576908108211174    
        1.87340000     2466.448621247742         3.610054875822829    
        1.87720000     2472.385142075361         3.622491173306425    
        1.88100000     2472.739690417437         3.640821743971862    
        1.88480000     2475.119420657385         3.625187384791291    
        1.88860000     2467.083265371553         3.606594704604402    
        1.89240000     2473.550055857014         3.642673814102135    
        1.89620000     2469.156124745724         3.609857759425605    
        1.90000000     2477.758488323024         3.622923248766964    
        1.90380000     2478.889123180290         3.634337349959529    
        1.90760000     2480.898729351575         3.629781448425669    
        1.91140000     2475.427879353319         3.614457467256481    
        1.91520000     2481.182667346944         3.620480443429626    
        1.91900000     2480.355000576832         3.630485413750911    
        1.92280000     2478.505109368639         3.602375678230846    
        1.92660000     2475.766147269074         3.605329683607664    
        1.93040000     2480.384203438053         3.633496299773424    
        1.93420000     2480.684380506921         3.626050127717258    
        1.93800000     2483.266304671872         3.625278556105754    
        1.94180000     2481.884630478555         3.644549112837483    
        1.94560000     2484.405048278302         3.642542892708697    
        1.94940000     2487.768263819938         3.624118045244691    
        1.95320000     2487.872612647932         3.646066775862379    
        1.95700000     2487.254290704214         3.638888315077156    
        1.96080000     2479.176601833179         3.608679604362478    
        1.96460000     2478.821923842240         3.606997891689730    
        1.96840000     2487.446205645600         3.649414260607820    
        1.97220000     2484.810873732339         3.637084817337192    
        1.97600000     2489.270938660592         3.646796730698629    
        1.97980000     2490.751788899889         3.646785117373914    
        1.98360000     2490.404059117439         3.639336270116960    
        1.98740000     2491.752015468237         3.653844377904622    
        1.99120000     2494.728823405825         3.629427703711941    
        1.99500000     2493.311118917050         3.599945286581658    
        1.99880000     2489.880883688367         3.605137003537521    
        2.00260000     2489.696511594533         3.654052426304562    
        2.00640000     2493.735827365238         3.637561312781560    
        2.01020000     2495.698410496759         3.645896500822479    
        2.01400000     2498.237501384100         3.620129512232590    
        2.01780000     2495.342459680708         3.630050064618712    
        2.02160000     2496.025046844546         3.634739416923130    
        2.02540000     2497.489419481057         3.636495012232935    
        2.02920000     2497.419993433276         3.652231796174150    
        2.03300000     2499.169409510797         3.635532198402624    
        2.03680000     2502.294763668594         3.653135780609305    
        2.04060000     2502.667050644402         3.650748407071460    
        2.04440000     2504.894803783490         3.656349144122479    
        2.04820000     2504.947938147764         3.675476455247225    
        2.05200000     2508.170678199778         3.662058667444859    
        2.05580000     2509.494410659142         3.640406051351187    
        2.05960000     2506.265913432601         3.653754710100913    
        2.06340000     2507.763781382068         3.650128336084286    
        2.06720000     2509.068458751792         3.648455815899043    
        2.07100000     2509.928494010546         3.647537783141439    
        2.07480000     2515.019577610733         3.657841824811068    
        2.07860000     2517.276995147981         3.671687909488773    
        2.08240000     2519.596725818602         3.682470668814641    
        2.08620000     2521.419636216579         3.674034019881148    
        2.09000000     2527.000023936271         3.683910019519659    
        2.09380000     2531.060863957041         3.688958158969251    
        2.09760000     2536.489469128421         3.689954219025247    
        2.10140000     2544.117571911923         3.688842186893668    
        2.10520000     2553.707615177667         3.711595544816062    
        2.10900000     2563.465486735983         3.714743998281895    
        2.11280000     2574.715033879645         3.733937442101064    
        2.11660000     2590.479896119963         3.754893139676068    
        2.12040000     2601.900885665033         3.767810074180268    
        2.12420000     2616.716471051333         3.795494319825365    
        2.12800000     2635.255378042492         3.832098082970088    
        2.13180000     2647.363728692234         3.829431498816593    
        2.13560000     2652.515496714701         3.813406686679693    
        2.13940000     2657.516496552134         3.835942371791963    
        2.14320000     2660.498466489620         3.857822245279475    
        2.14700000     2656.348526773706         3.853359790965283    
        2.15080000     2651.057016142489         3.862794483340505    
        2.15460000     2642.647571006003         3.853581019940235    
        2.15840000     2624.666897796365         3.816554608042154    
        2.16220000     2610.187104665054         3.771388761253903    
        2.16600000     2597.179940250573         3.774991084679418    
        2.16980000     2584.345995771180         3.726541563230449    
        2.17360000     2578.735833805962         3.730704666222484    
        2.17740000     2565.014448800257         3.739815168483474    
        2.18120000     2550.500963116314         3.721644596573970    
        2.18500000     2549.538469555744         3.720853600550570    
        2.18880000     2546.266045055653         3.736692110461614    
        2.19260000     2543.997620964970         3.707545311327589    
        2.19640000     2542.606244541601         3.693931069676304    
        2.20020000     2542.352677394299         3.683426080834340    
        2.20400000     2541.296835855961         3.695395010430547    
        2.20780000     2540.088137818148         3.716356062386226    
        2.21160000     2538.000519481549         3.682669617969008    
        2.21540000     2539.295456054690         3.706184135205985    
        2.21920000     2535.209567958085         3.695618404008552    
        2.22300000     2536.038489160468         3.688260633180392    
        2.22680000     2533.528991475755         3.681021590204575    
        2.23060000     2536.620269479920         3.695644229187514    
        2.23440000     2534.068983226834         3.680963065040430    
        2.23820000     2538.307020631898         3.679806204159089    
        2.24200000     2540.253221761096         3.713982269719480    
        2.24580000     2544.856840052748         3.695262082397513    
        2.24960000     2543.084737177185         3.695251716695603    
        2.25340000     2542.925489418776         3.715528290866176    
        2.25720000     2542.170901040169         3.708932088807643    
        2.26100000     2540.316324840631         3.699027640212147    
        2.26480000     2537.300275761083         3.686924434594359    
        2.26860000     2542.962793389761         3.704608636330635    
        2.27240000     2547.743850839878         3.740862795006297    
        2.27620000     2553.450424596660         3.724735292458802    
        2.28000000     2551.124947268821         3.728540938139914    
        2.28380000     2552.982900156253         3.715243688387344    
        2.28760000     2553.712252199758         3.727591572442872    
        2.29140000     2557.564926271669         3.707063899582602    
        2.29520000     2558.065997989783         3.698531446669273    
        2.29900000     2561.853254734076         3.700992172834120    
        2.30280000     2561.688984131983         3.724694322494529    
        2.30660000     2565.283772797263         3.713202156888165    
        2.31040000     2563.766508174031         3.728256080644164    
        2.31420000     2567.176410332811         3.703933078226388    
        2.31800000     2566.528914957959         3.711617131688731    
        2.32180000     2575.952770155436         3.755578100589779    
        2.32560000     2576.757700903413         3.758093692389002    
        2.32940000     2579.230462863388         3.753982153830483    
        2.33320000     2577.659140423563         3.731551568751166    
        2.33700000     2588.938727795562         3.757415196113221    
        2.34080000     2589.393762901103         3.750297473219678    
        2.34460000     2595.133227561887         3.759108579387846    
        2.34840000     2598.890367736235         3.797451136319232    
        2.35220000     2608.800124955651         3.769545004866186    
        2.35600000     2613.428839945659         3.796085420229691    
        2.35980000     2617.409074150010         3.762273578389795    
        2.36360000     2620.924861189653         3.778892545719329    
        2.36740000     2633.261161556553         3.786473489149256    
        2.37120000     2643.620231270904         3.822585462409847    
        2.37500000     2655.182306557865         3.849503077373124    
        2.37880000     2667.679563582896         3.862143434678181    
        2.38260000     2684.291066128865         3.890821299198054    
        2.38640000     2700.931766832923         3.904574581037275    
        2.39020000     2728.305909895710         3.936992930905232    
        2.39400000     2757.313204039185         3.969707309399334    
        2.39780000     2797.463777737408         4.005189310141522    
        2.40160000     2832.482982447878         4.056744841785517    
        2.40540000     2883.434863499911         4.141240794064907    
        2.40920000     2936.666600281816         4.204307351564946    
        2.41300000     2999.810919239086         4.290640421844074    
        2.41680000     3062.561747702193         4.336941340489521    
        2.42060000     3130.243203863402         4.442683165539768    
        2.42440000     3206.043176413420         4.855431842998476    
        2.42820000     3281.104840543061         4.650081079715592    
        2.43200000     3352.718250456442         4.879696671803406    
        2.43580000     3441.245213104524         5.035063915823308    
        2.43960000     3533.905720134722         5.873470686952322    
        2.44340000     3655.496496538990         6.303827652527633    
        2.44720000     3796.287041838071         7.144359461994008    
        2.45100000     3969.619490641029         7.788009474537652    
        2.45480000     4173.064586148337         8.741981832767959    
        2.45860000     4389.114687371506         8.700518815273936    
        2.46240000     4614.382419359285         9.266853131461991    
        2.46620000     4827.512807468450         8.693036464416286    
        2.47000000     5032.331086928626         9.191543491642532    
        2.47380000     5212.368374082710         8.115457898782186    
        2.47760000     5356.110911386050         8.030839303163335    
        2.48140000     5497.893699103400         7.837125282666769    
        2.48520000     5635.143313716742         8.253844571046711    
        2.48900000     5799.530226174235         9.191748958067949    
        2.49280000     5985.679441650430         9.418409198969409    
        2.49660000     6180.965401625654         10.13889411320873    
        2.50040000     6411.764097006257         11.02983571781695    
        2.50420000     6659.363364719335         11.32804733234299    
        2.50800000     6907.996901714701         10.92449067147906    
        2.51180000     7085.114735131393         9.415517600823920    
        2.51560000     7170.742832986831         9.539064680566243    
        2.51940000     7141.969935981499         9.559143120683514    
        2.52320000     6979.119426580250         10.96102591427227    
        2.52700000     6708.241527181146         12.81593948509531    
        2.53080000     6357.514296631291         13.74436500885861    
        2.53460000     5952.580533199221         14.27689600711301    
        2.53840000     5504.130296008215         13.76516296576245    
        2.54220000     5062.661834204219         13.21780945979086    
        2.54600000     4639.169867082811         12.09736725035943    
        2.54980000     4265.006868104799         11.06154926072748    
        2.55360000     3935.579829902777         9.820145648115794    
        2.55740000     3664.865145165817         8.556013974191137    
        2.56120000     3442.260183431838         7.513254012598351    
        2.56500000     3265.287949230514         6.431537460370579    
        2.56880000     3137.659895963522         5.658732016858011    
        2.57260000     3035.597952816323         4.903972275572995    
        2.57640000     2953.946687421421         4.367660928849787    
        2.58020000     2892.880782687891         4.135184023767793    
        2.58400000     2847.387168391274         4.095479483702001    
        2.58780000     2804.097231777658         4.036866120323081    
        2.59160000     2773.421213229659         3.984361907595911    
        2.59540000     2747.304487393636         3.936710710907172    
        2.59920000     2722.299273083536         3.887332890474724    
        2.60300000     2697.846195117089         3.871588516636509    
        2.60680000     2682.866815901309         3.876439954406985    
        2.61060000     2670.619674922311         3.845575775783708    
        2.61440000     2661.221272872398         3.838278045475254    
        2.61820000     2647.207897007742         3.810106680197870    
        2.62200000     2641.879359592621         3.825415428260753    
        2.62580000     2630.955166273904         3.826134564415404    
        2.62960000     2627.100925364973         3.789467312296509    
        2.63340000     2617.785437871199         3.782173061156950    
        2.63720000     2611.788665034665         3.776791411031893    
        2.64100000     2608.073744879292         3.780284148474379    
        2.64480000     2608.055992911823         3.783618647958483    
        2.64860000     2599.920560993187         3.750067735306766    
        2.65240000     2595.758435115473         3.752967935523911    
        2.65620000     2595.031413270171         3.757259764580093    
        2.66000000     2591.266353451718         3.711564172530694    
        2.66380000     2586.163698696515         3.748037064841895    
        2.66760000     2589.189977360737         3.726901068763164    
        2.67140000     2582.747583989550         3.746885896082790    
        2.67520000     2579.140164757443         3.745790206672108    
        2.67900000     2572.048935509371         3.715422866058125    
        2.68280000     2574.082213545010         3.734140322199508    
        2.68660000     2572.034632108921         3.734873119956659    
        2.69040000     2573.821553919149         3.739627287714058    
        2.69420000     2566.648632007601         3.730272628070185    
        2.69800000     2565.211906179687         3.711424295486895    
        2.70180000     2566.014950268650         3.735678789347733    
        2.70560000     2565.606928098376         3.732867194742495    
        2.70940000     2563.962244391010         3.740830027957057    
        2.71320000     2561.695196160188         3.724894571583584    
        2.71700000     2560.692493673114         3.696780316678974    
        2.72080000     2561.641376369234         3.698997560290680    
        2.72460000     2560.665688944125         3.705892682914264    
        2.72840000     2561.105276922641         3.690301156380486    
        2.73220000     2556.491063316261         3.688745217899524    
        2.73600000     2562.491827119273         3.707811565083555    
        2.73980000     2559.233346309690         3.697676794569242    
        2.74360000     2559.653645555908         3.729894987478196    
        2.74740000     2554.284355020526         3.690372656384767    
        2.75120000     2554.343633326979         3.701082122144299    
        2.75500000     2558.757022646470         3.733629729180485    
        2.75880000     2554.232628940663         3.694937612597765    
        2.76260000     2555.137031464990         3.715853622122825    
        2.76640000     2551.253859354842         3.691286949911229    
        2.77020000     2551.833616089304         3.680835905658263    
        2.77400000     2553.103339158011         3.696755795505049    
        2.77780000     2550.688652085324         3.688610704580398    
        2.78160000     2552.836752994821         3.688469937255912    
        2.78540000     2554.124100397586         3.703254905613474    
        2.78920000     2550.148167146249         3.722356263801316    
        2.79300000     2551.785729471079         3.705396955583149    
        2.79680000     2552.509710379472         3.705676698091604    
        2.80060000     2543.880885276239         3.674022840437001    
        2.80440000     2549.758947214185         3.704459766954985    
        2.80820000     2552.382241698396         3.703783238939324    
        2.81200000     2551.570132603341         3.678050766055631    
        2.81580000     2549.305702435547         3.697264133577108    
        2.81960000     2551.679820670055         3.708601224098919    
        2.82340000     2545.510111900550         3.690971666470347    
        2.82720000     2549.781955258341         3.692578653554155    
        2.83100000     2548.905283983718         3.699031638329561    
        2.83480000     2548.727585185169         3.685302944418122    
        2.83860000     2546.458506245322         3.678281498824733    
        2.84240000     2546.155774490449         3.700472571134032    
        2.84620000     2547.155167393456         3.693732670904572    
        2.85000000     2548.509247951262         3.707536221229603    
        2.85380000     2551.653789304850         3.718298379701809    
        2.85760000     2550.277095386547         3.709811358316266    
        2.86140000     2547.042283766206         3.697159180787865    
        2.86520000     2545.489840683316         3.700526731974057    
        2.86900000     2548.389413510199         3.704983677746026    
        2.87280000     2548.112120040431         3.706607367649460    
        2.87660000     2547.385131113797         3.708015651882294    
        2.88040000     2545.461972422198         3.705520737577545    
        2.88420000     2547.077661437430         3.710626292141745    
        2.88800000     2547.403874694407         3.718904792497350    
        2.89180000     2544.611989359712         3.701809971454787    
        2.89560000     2547.476612569204         3.689635550928256    
        2.89940000     2552.249991378688         3.683858290774416    
        2.90320000     2545.130591740609         3.687984597253243    
        2.90700000     2548.930299656283         3.679242730354047    
        2.91080000     2547.426365148873         3.687059163054203    
        2.91460000     2544.659714312971         3.684052162374538    
        2.91840000     2542.945442966567         3.695342614477508    
        2.92220000     2545.920673097501         3.708772215389110    
        2.92600000     2547.219968421733         3.719128123329390    
        2.92980000     2549.017498851083         3.713456274986960    
        2.93360000     2546.068494325931         3.684394915175494    
        2.93740000     2548.859383070440         3.697235508049337    
        2.94120000     2547.461238075727         3.718898453456258    
        2.94500000     2547.441978848708         3.686260263270466    
        2.94880000     2545.617616233139         3.686896325517463    
        2.95260000     2549.049072959399         3.680263083554306    
        2.95640000     2550.299303435201         3.682366611374646    
        2.96020000     2550.500924725361         3.702177949034279    
        2.96400000     2548.154369011783         3.677551342400000    
        2.96780000     2548.130301232637         3.680656637930008    
        2.97160000     2552.518434373830         3.700554172888652    
        2.97540000     2550.683547591726         3.704641317806517    
        2.97920000     2548.062679313436         3.690305791308821    
        2.98300000     2547.194792526184         3.699978761861995    
        2.98680000     2542.824826818734         3.709976865870680    
        2.99060000     2546.475627993469         3.700357099153269    
        2.99440000     2548.512760362976         3.725425575746460    
        2.99820000     2549.636511500098         3.706982839132732    
        3.00200000     2550.646055805196         3.702200846000128    
        3.00580000     2550.042162499431         3.697446884308421    
        3.00960000     2547.435952935414         3.699567542254998    
        3.01340000     2550.226083912462         3.722531232231955    
        3.01720000     2543.376518439103         3.703638888285840    
        3.02100000     2543.081908070290         3.654045859103893    
        3.02480000     2543.139258002918         3.658876658520268    
        3.02860000     2548.785377170127         3.697421381485621    
        3.03240000     2546.030211991505         3.691123707375267    
        3.03620000     2546.922003039735         3.673318866750624    
        3.04000000     2543.969119060283         3.696991968252028    
        3.04380000     2548.478027659341         3.703041400972432    
        3.04760000     2544.334319568275         3.681572979306743    
        3.05140000     2546.183306920931         3.697535326016283    
        3.05520000     2551.927134681129         3.715151491780006    
        3.05900000     2547.304229251036         3.694846807573888    
        3.06280000     2545.572759244944         3.699233962930546    
        3.06660000     2549.116435331581         3.686065195789446    
        3.07040000     2547.296318072969         3.668480792103515    
        3.07420000     2545.788003207902         3.685808135248669    
        3.07800000     2543.633696918246         3.704898841690778    
        3.08180000     2548.520857818880         3.694907722393973    
        3.08560000     2545.363325551045         3.703968689516333    
        3.08940000     2547.504115518028         3.714060732094290    
        3.09320000     2545.371697348317         3.688602010753625    
        3.09700000     2551.956086960239         3.685220675876075    
        3.10080000     2548.326676398482         3.675417021283910    
        3.10460000     2551.540325581858         3.708621061331767    
        3.10840000     2548.986649355966         3.699534174233721    
        3.11220000     2549.097606973757         3.686895987611125    
        3.11600000     2551.582805044128         3.715100330627416    
        3.11980000     2551.023984082045         3.711957192916522    
        3.12360000     2546.645598384071         3.715247539810102    
        3.12740000     2548.482593143841         3.688478043176794    
        3.13120000     2546.679122793125         3.683306234814256    
        3.13500000     2550.966382900801         3.685880684941956    
        3.13880000     2546.161738178089         3.682143770898355    
        3.14260000     2550.506179610834         3.702457317003978    
        3.14640000     2552.617970339218         3.702986151887746    
        3.15020000     2555.221931174074         3.698249721056081    
        3.15400000     2554.328051834433         3.711957734909359    
        3.15780000     2559.568165942120         3.720360069166512    
        3.16160000     2563.262064640388         3.739755399154865    
        3.16540000     2558.427832917069         3.691309247176054    
        3.16920000     2563.018484149828         3.731812071257687    
        3.17300000     2567.391096022671         3.724409850503621    
        3.17680000     2576.969934900517         3.728587810014419    
        3.18060000     2582.632902257451         3.755172009238945    
        3.18440000     2585.163571627565         3.751115176121135    
        3.18820000     2593.602877778966         3.765177025298935    
        3.19200000     2600.773841614998         3.759512868739662    
        3.19580000     2605.224950883079         3.761705888035455    
        3.19960000     2615.417634190025         3.753197941999224    
        3.20340000     2614.372586386350         3.735913361002556    
        3.20720000     2621.875234275837         3.769209583558149    
        3.21100000     2624.207247327589         3.798934727540729    
        3.21480000     2617.912684731399         3.784139686452518    
        3.21860000     2614.400990079750         3.762025678257392    
        3.22240000     2609.483646665324         3.782422562628824    
        3.22620000     2601.854729713624         3.787884777348578    
        3.23000000     2598.082342514058         3.772115806913534    
        3.23380000     2589.971279828745         3.751359306635214    
        3.23760000     2588.493032926062         3.744348419517718    
        3.24140000     2574.685692623193         3.724196397783576    
        3.24520000     2571.697685825845         3.739973827386825    
        3.24900000     2570.792730979877         3.732639371048433    
        3.25280000     2568.095736428331         3.701187961647741    
        3.25660000     2566.797941275128         3.727672408528242    
        3.26040000     2562.619342285730         3.715821551527017    
        3.26420000     2558.044641314106         3.703573947268295    
        3.26800000     2561.278647565287         3.704124969108257    
        3.27180000     2560.795400689690         3.715952005758456    
        3.27560000     2561.362059680123         3.725868519820176    
        3.27940000     2557.605838070726         3.716663500445133    
        3.28320000     2560.079402352540         3.717246170011942    
        3.28700000     2559.337256284201         3.710324788253213    
        3.29080000     2561.362732702186         3.731286083701309    
        3.29460000     2562.456214123319         3.729434979561647    
        3.29840000     2568.711816027574         3.756929095744121    
        3.30220000     2569.063850803740         3.720868682379184    
        3.30600000     2572.935627501822         3.717063157848063    
        3.30980000     2579.750788716673         3.751004671039428    
        3.31360000     2589.888299484167         3.785599373847998    
        3.31740000     2601.755135703918         3.770744693417639    
        3.32120000     2618.472245512000         3.762198161361432    
        3.32500000     2637.347930160141         3.772757579774962    
        3.32880000     2652.251424654127         3.829827869520108    
        3.33260000     2652.274567247730         3.814960063823278    
        3.33640000     2656.432214076938         3.831471892166701    
        3.34020000     2656.949748998240         3.831885192464121    
        3.34400000     2656.947439691190         3.824365187858462    
        3.34780000     2643.264557245481         3.808570983959327    
        3.35160000     2634.451281806165         3.797157928546814    
        3.35540000     2626.913453140594         3.802882697050027    
        3.35920000     2613.163950159058         3.745776871567073    
        3.36300000     2598.140918177083         3.759259977545115    
        3.36680000     2592.463441586268         3.749677861588137    
        3.37060000     2582.335639035954         3.719833632140623    
        3.37440000     2581.618462163773         3.746311506334488    
        3.37820000     2574.887763139802         3.745214158854751    
        3.38200000     2575.594869540397         3.745565780049906    
        3.38580000     2567.339894599192         3.705017865072548    
        3.38960000     2565.136103167776         3.715063871645161    
        3.39340000     2561.541112655731         3.719265975047381    
        3.39720000     2559.415923508538         3.681587410113241    
        3.40100000     2553.444879804553         3.692290265410289    
        3.40480000     2552.127027136236         3.712686218578173    
        3.40860000     2557.872425032963         3.707990411537713    
        3.41240000     2552.515323948877         3.651893654395179    
        3.41620000     2552.961916207544         3.710318687342081    
        3.42000000     2554.687461485583         3.732148719824667    
        3.42380000     2549.750882983872         3.714824209506614    
        3.42760000     2548.239320843445         3.694163166434118    
        3.43140000     2550.391288201499         3.676191569743343    
        3.43520000     2553.686915539753         3.689289529334193    
        3.43900000     2548.767918818118         3.713133471321934    
        3.44280000     2546.265988413489         3.680677474624286    
        3.44660000     2545.362685201813         3.698867557749672    
        3.45040000     2547.308382261760         3.697615369422045    
        3.45420000     2546.359220775156         3.717192207644536    
        3.45800000     2547.393799948800         3.720396372390012    
        3.46180000     2550.261966791426         3.717146512025642    
        3.46560000     2545.811848019034         3.692831473360899    
        3.46940000     2548.069722951626         3.728503508991103    
        3.47320000     2543.407045841210         3.689100162386352    
        3.47700000     2547.499955479114         3.691144264596155    
        3.48080000     2550.083648814477         3.696246217403051    
        3.48460000     2543.917257948254         3.678833404722935    
        3.48840000     2546.097955966682         3.690691520608992    
        3.49220000     2546.998688282857         3.708467002094408    
        3.49600000     2543.003707505995         3.675983581007772    
        3.49980000     2547.444022308937         3.662201084368993    
        3.50360000     2551.641984956987         3.667843773919295    
        3.50740000     2546.635168637539         3.675447271830360    
        3.51120000     2548.645020330509         3.693158573745933    
        3.51500000     2547.676612525136         3.727284112744273    
        3.51880000     2542.796440482149         3.673931889739380    
        3.52260000     2542.242308918368         3.700090042967074    
        3.52640000     2544.825069750744         3.713212793658536    
        3.53020000     2546.060310184499         3.743159782503606    
        3.53400000     2551.388663251763         3.722209694972207    
        3.53780000     2548.620847771811         3.700242518173440    
        3.54160000     2544.485302800484         3.728963836741227    
        3.54540000     2546.398729227634         3.718773605846269    
        3.54920000     2548.086469204966         3.679757670917784    
        3.55300000     2545.338596939871         3.688429873080877    
        3.55680000     2548.389440727190         3.713517964171327    
        3.56060000     2548.448600252701         3.699401953583109    
        3.56440000     2549.391620828030         3.700094606849553    
        3.56820000     2549.008259092926         3.697470076167764    
        3.57200000     2551.337126712313         3.703992142615967    
        3.57580000     2543.178372815140         3.701518358755341    
        3.57960000     2548.147428159226         3.683096592190038    
        3.58340000     2548.148603784040         3.688976864317204    
        3.58720000     2542.606593200427         3.682056786878469    
        3.59100000     2544.143577958772         3.702169866755758    
        3.59480000     2545.990739932547         3.727386141124039    
        3.59860000     2545.606843506622         3.715563791732997    
        3.60240000     2545.432959705907         3.696004630950084    
        3.60620000     2543.946449553388         3.700579444647396    
        3.61000000     2548.914084144267         3.704673495344157    
        3.61380000     2547.580775242343         3.707386230306010    
        3.61760000     2547.092282034828         3.703774193422595    
        3.62140000     2544.684083231854         3.677034360351494    
        3.62520000     2547.435106728823         3.668405586758600    
        3.62900000     2549.239388647594         3.657820122983435    
        3.63280000     2543.141540441295         3.677313731846261    
        3.63660000     2540.099796395502         3.682509913391415    
        3.64040000     2544.309052239702         3.693780864155020    
        3.64420000     2546.584672641725         3.713953204444261    
        3.64800000     2541.461152614544         3.686126273335405    
        3.65180000     2542.957991680332         3.681283347338269    
        3.65560000     2544.604521697185         3.701916740846142    
        3.65940000     2548.412173275583         3.672715824143858    
        3.66320000     2547.586890795919         3.686869769589669    
        3.66700000     2549.158940730650         3.701000951409345    
        3.67080000     2547.102077293847         3.691599903240415    
        3.67460000     2548.125566453992         3.696964003631122    
        3.67840000     2550.083271955932         3.727484684481089    
        3.68220000     2546.365877052369         3.705718513118745    
        3.68600000     2547.217508624507         3.695813888288010    
        3.68980000     2550.102833205136         3.707360080540246    
        3.69360000     2547.910141577175         3.709222692017368    
        3.69740000     2548.806100034365         3.682780033607453    
        3.70120000     2547.665446200247         3.684251987678597    
        3.70500000     2553.220248958278         3.720262340213855    
        3.70880000     2552.807512283105         3.724119653291238    
        3.71260000     2554.254259403275         3.693111599336006    
        3.71640000     2556.277798427468         3.707927399745323    
        3.72020000     2559.830158633927         3.715280247440292    
        3.72400000     2554.422472242915         3.705159288387308    
        3.72780000     2553.116256414101         3.709574493410138    
        3.73160000     2553.265123964138         3.688448412419675    
        3.73540000     2548.933309978785         3.690492457285420    
        3.73920000     2552.129464980483         3.729400878713764    
        3.74300000     2551.551167748727         3.701994281278609    
        3.74680000     2550.978661634482         3.699820863803171    
        3.75060000     2545.842386257829         3.723032147143004    
        3.75440000     2546.295130300493         3.708611386709869    
        3.75820000     2550.938108766220         3.716833055121559    
        3.76200000     2541.807343713746         3.714831796606096    
        3.76580000     2546.495331992229         3.729586936990987    
        3.76960000     2543.008103387364         3.714966193063481    
        3.77340000     2540.417434979762         3.720111216443478    
        3.77720000     2539.283682536478         3.680272862108312    
        3.78100000     2543.870806571083         3.683495166701279    
        3.78480000     2542.258130745116         3.713721505611616    
        3.78860000     2541.848162417295         3.675446978231603    
        3.79240000     2536.374497447744         3.684574017122711    
        3.79620000     2540.620455063295         3.691493959159047    
        3.80000000     2546.584145172376         3.674410858805718    
        3.80380000     2545.393232502641         3.666522670464660    
        3.80760000     2540.043303194173         3.669453107787572    
        3.81140000     2548.350738079190         3.694649728805705    
        3.81520000     2544.083447475885         3.721931891630350    
        3.81900000     2544.136778063027         3.672165579253914    
        3.82280000     2541.823776011090         3.700549990001637    
        3.82660000     2547.731191941097         3.716863846779660    
        3.83040000     2545.315228454479         3.750399216255280    
        3.83420000     2539.635200912920         3.690596309953559    
        3.83800000     2536.278560583406         3.688283028164559    
        3.84180000     2540.832477937747         3.717300534081033    
        3.84560000     2538.004690450680         3.714112066984440    
        3.84940000     2544.884061801987         3.696712822449797    
        3.85320000     2539.998640636302         3.703240598347655    
        3.85700000     2545.361966354896         3.686204848674224    
        3.86080000     2542.596365156917         3.703323263478228    
        3.86460000     2549.935069039778         3.710856954334889    
        3.86840000     2540.870409340713         3.680568533834433    
        3.87220000     2542.188268559363         3.696587725432515    
        3.87600000     2541.006807400425         3.691606648297200    
        3.87980000     2543.132919559319         3.696880427950898    
        3.88360000     2542.026358592942         3.696775288245728    
        3.88740000     2540.935490098053         3.688989731823557    
        3.89120000     2539.333359076308         3.710585050558525    
        3.89500000     2541.342097949531         3.682057113445583    
        3.89880000     2541.937505257669         3.711955102770787    
        3.90260000     2542.571307223773         3.692134311800165    
        3.90640000     2538.909438112086         3.681527181760049    
        3.91020000     2545.088732080044         3.676573375336492    
        3.91400000     2543.919535953995         3.722499899808090    
        3.91780000     2545.065770744513         3.715027652006923    
        3.92160000     2541.180061931841         3.692251891650443    
        3.92540000     2543.340022824691         3.671052676228854    
        3.92920000     2545.047446151311         3.702540690814156    
        3.93300000     2540.189067059322         3.695286032253338    
        3.93680000     2539.888424863334         3.688142434194836    
        3.94060000     2540.354330487717         3.692757747655032    
        3.94440000     2542.880010852176         3.692528473102865    
        3.94820000     2541.225186303745         3.689198728296921    
        3.95200000     2542.279297332972         3.712770278728875    
        3.95580000     2539.578897361513         3.682025404724415    
        3.95960000     2542.674310865499         3.677976196632518    
        3.96340000     2543.187970319568         3.676537028286395    
        3.96720000     2544.611280694672         3.701488074019045    
        3.97100000     2545.022326716306         3.712365334341768    
        3.97480000     2540.356839370454         3.722013204376311    
        3.97860000     2540.642313307006         3.729468907222074    
        3.98240000     2545.279005562873         3.728668544286970    
        3.98620000     2541.489825951942         3.700222156416122    
        3.99000000     2542.513521022249         3.676446715512904    
        3.99380000     2544.570484013480         3.704026035658749    
        3.99760000     2546.150878727572         3.695323402873384    
        4.00140000     2542.482703038399         3.687089448926094    
        4.00520000     2541.959776623388         3.707620389442331    
        4.00900000     2541.772203361362         3.712729828467896    
        4.01280000     2542.672131662735         3.708311915073939    
        4.01660000     2542.554927184136         3.678040069508948    
        4.02040000     2544.821860169979         3.683798730848276    
        4.02420000     2543.081433387495         3.702975970837879    
        4.02800000     2543.472289643118         3.703693107423700    
        4.03180000     2543.889582806632         3.699367202941525    
        4.03560000     2549.614932462309         3.706282761946723    
        4.03940000     2550.515764095868         3.714875602267587    
        4.04320000     2549.389477749992         3.707350399682062    
        4.04700000     2550.635067655191         3.722906781449542    
        4.05080000     2549.983228048397         3.713712318429192    
        4.05460000     2549.293508689981         3.708906998776553    
        4.05840000     2549.898834943796         3.714347924674780    
        4.06220000     2549.662607136468         3.725595175427360    
        4.06600000     2554.130581412382         3.733611369065626    
        4.06980000     2558.163894105903         3.740590368602622    
        4.07360000     2555.257789053658         3.732088003952069    
        4.07740000     2548.626629970289         3.718113494480135    
        4.08120000     2557.219236048810         3.717014311954114    
        4.08500000     2563.897874702384         3.733731155271772    
        4.08880000     2562.066522717721         3.703031893379386    
        4.09260000     2557.029641070917         3.687254092190440    
        4.09640000     2560.421337280702         3.708168668902425    
        4.10020000     2561.797422320907         3.714033634148167    
        4.10400000     2570.888558342961         3.724274232606760    
        4.10780000     2566.652339074820         3.710953562526674    
        4.11160000     2570.458065917505         3.714470472885840    
        4.11540000     2571.437479771103         3.720391044635640    
        4.11920000     2578.764507418601         3.737355385748013    
        4.12300000     2575.344922907398         3.718620499866143    
        4.12680000     2581.125706152898         3.713196053488121    
        4.13060000     2592.116413665656         3.800973043121500    
        4.13440000     2589.445493965742         3.770799694154145    
        4.13820000     2595.921226787035         3.768160676976520    
        4.14200000     2603.676327136543         3.788036935963446    
        4.14580000     2613.840767134576         3.836091897035996    
        4.14960000     2633.664662881031         3.807934160309209    
        4.15340000     2643.195104867575         3.850522050315337    
        4.15720000     2662.772533483138         3.835833972638500    
        4.16100000     2681.696611964906         3.905619948957497    
        4.16480000     2717.995180050710         3.917640376786638    
        4.16860000     2742.484502411241         3.937413548960219    
        4.17240000     2788.349012595434         3.981062311666149    
        4.17620000     2835.652332882180         4.064064965746889    
        4.18000000     2909.066610825063         4.212054237072184    
        4.18380000     2976.513082418041         4.226881208942225    
        4.18760000     3065.943037346991         4.849014372680508    
        4.19140000     3162.300821309968         4.923110765084540    
        4.19520000     3264.237418511298         5.116943913521872    
        4.19900000     3375.212491638619         5.654663093344769    
        4.20280000     3496.243156082546         5.225181978263029    
        4.20660000     3598.113855831161         5.575392948629014    
        4.21040000     3700.112568811605         5.149020675442121    
        4.21420000     3777.473684524746         5.299796331585084    
        4.21800000     3823.081878418535         5.324693894716148    
        4.22180000     3846.659430114544         5.378184595836560    
        4.22560000     3836.820378251830         5.345715615268363    
        4.22940000     3796.798167828992         5.274747141587668    
        4.23320000     3734.705946882276         5.214051747930037    
        4.23700000     3651.695007692540         5.585837090889069    
        4.24080000     3560.611209905187         5.715973176967188    
        4.24460000     3466.101307822065         5.425171859903814    
        4.24840000     3384.274989517760         4.914151572031542    
        4.25220000     3315.359699424803         4.692083772256329    
        4.25600000     3256.943572347189         4.599286267680272    
        4.25980000     3229.062462676227         4.544517378029465    
        4.26360000     3227.421476600420         4.519042267789595    
        4.26740000     3243.558382605427         4.565197814702474    
        4.27120000     3288.278137088944         4.659930147930492    
        4.27500000     3352.073379675983         5.018330492711346    
        4.27880000     3435.086996584541         4.862187609612582    
        4.28260000     3511.534967033365         5.464642597776036    
        4.28640000     3604.665422856270         5.204813111586504    
        4.29020000     3690.993297718265         5.246303237339164    
        4.29400000     3755.103753140129         5.235821616045705    
        4.29780000     3788.591215129664         5.256526829591807    
        4.30160000     3785.100567783463         5.247146755914542    
        4.30540000     3748.191669665677         5.238116280350533    
        4.30920000     3689.253509020881         5.185835029108949    
        4.31300000     3603.287208791216         6.158036261505818    
        4.31680000     3482.385851209367         6.235649140881084    
        4.32060000     3359.491559510788         6.236068117409043    
        4.32440000     3236.325216961201         5.787387999404699    
        4.32820000     3121.542341527698         5.476311727772057    
        4.33200000     3020.622999422322         5.206252437411028    
        4.33580000     2930.884027000576         4.818226337463178    
        4.33960000     2862.699858287683         4.608144917641450    
        4.34340000     2799.375043281791         4.027036667870770    
        4.34720000     2752.078755017328         3.985966086115022    
        4.35100000     2716.335786697040         3.932207919921293    
        4.35480000     2687.218655701935         3.883254822675611    
        4.35860000     2663.897566147830         3.864877853698452    
        4.36240000     2648.718656971198         3.849840639531119    
        4.36620000     2638.964709566527         3.855066649309219    
        4.37000000     2629.382246297792         3.847136199594007    
        4.37380000     2617.939911041989         3.805329715092864    
        4.37760000     2603.827134674192         3.806286409352198    
        4.38140000     2604.443616682672         3.796650109928727    
        4.38520000     2598.487224043963         3.778338507600368    
        4.38900000     2593.930100873109         3.750033160673843    
        4.39280000     2584.370886189361         3.737222301833363    
        4.39660000     2574.290901357211         3.723331367582607    
        4.40040000     2575.767442348716         3.737009999644785    
        4.40420000     2577.502933735878         3.741635006813301    
        4.40800000     2575.321012112898         3.727844942025785    
        4.41180000     2574.675008311314         3.753330672460008    
        4.41560000     2569.680427275659         3.741939017722044    
        4.41940000     2567.521487183238         3.710948342440851    
        4.42320000     2565.133691309841         3.721097708961884    
        4.42700000     2564.949783790250         3.710870463909110    
        4.43080000     2565.294710150020         3.752593528838378    
        4.43460000     2563.024195761066         3.753680678022278    
        4.43840000     2556.484983905113         3.729586890434605    
        4.44220000     2555.218896937494         3.722778120992623    
        4.44600000     2554.710963097468         3.728408291475596    
        4.44980000     2554.533766720453         3.725808546313845    
        4.45360000     2552.489337087442         3.725393798471464    
        4.45740000     2552.792546661634         3.746279892703070    
        4.46120000     2551.001339179925         3.722056109675100    
        4.46500000     2549.669465468698         3.704623384603464    
        4.46880000     2546.959561516532         3.692046806312276    
        4.47260000     2545.008638180077         3.654696909240829    
        4.47640000     2545.584258458257         3.675039316370862    
        4.48020000     2546.749127093530         3.707722405390197    
        4.48400000     2545.785614845186         3.718981843575979    
        4.48780000     2546.874629522468         3.710093002834026    
        4.49160000     2542.377734177465         3.684842332735335    
        4.49540000     2543.798702349960         3.706114259828535    
        4.49920000     2545.672271400195         3.669019701900864    
        4.50300000     2548.639333001659         3.704343000874694    
        4.50680000     2548.672097589747         3.698061469089540    
        4.51060000     2551.466723410678         3.682785870525453    
        4.51440000     2553.147180543774         3.710753962206160    
        4.51820000     2550.116722187096         3.726169430865093    
        4.52200000     2549.008069135029         3.712747835372472    
        4.52580000     2553.026003466863         3.734865304026764    
        4.52960000     2558.123118149122         3.702161363819840    
        4.53340000     2550.033059307873         3.715583186205950    
        4.53720000     2546.023962288096         3.721102339768670    
        4.54100000     2551.323150378790         3.723406173115471    
        4.54480000     2547.083274285553         3.689053521740727    
        4.54860000     2552.144171507686         3.695095305898199    
        4.55240000     2541.660811453325         3.683518124852534    
        4.55620000     2541.401392695891         3.703819722591617    
        4.56000000     2539.396692514734         3.701142550425536    
        4.56380000     2542.300239939011         3.674252426743987    
        4.56760000     2540.546933727209         3.662130188190673    
        4.57140000     2539.144420946217         3.697434315436136    
        4.57520000     2535.677987175244         3.678263845981723    
        4.57900000     2532.696799767439         3.692911837741228    
        4.58280000     2529.442690204292         3.675874492951625    
        4.58660000     2528.794726812115         3.673733592993139    
        4.59040000     2529.117734465879         3.688216012382665    
        4.59420000     2531.016854297181         3.668210911323879    
        4.59800000     2529.581339097922         3.678019727149535    
        4.60180000     2531.122465806927         3.672039190825874    
        4.60560000     2527.856644904930         3.693641665462472    
        4.60940000     2523.993022328451         3.700052459017366    
        4.61320000     2525.654173351685         3.683273895644910    
        4.61700000     2530.159132119871         3.676416828731073    
        4.62080000     2530.886021051989         3.648571612029096    
        4.62460000     2528.343643870066         3.656898906714761    
        4.62840000     2524.787072080938         3.656249505902085    
        4.63220000     2524.861507755973         3.695638760723310    
        4.63600000     2526.927797259521         3.700375463664054    
        4.63980000     2532.919412622437         3.696520176973949    
        4.64360000     2531.411920930657         3.702927888101694    
        4.64740000     2525.759224157655         3.686398157436523    
        4.65120000     2531.961548191372         3.706914221644875    
        4.65500000     2533.398636379784         3.698223638108192    
        4.65880000     2530.719220830259         3.681582814065974    
        4.66260000     2528.284634761911         3.700326579303288    
        4.66640000     2533.238461870823         3.729903235041422    
        4.67020000     2536.221107814195         3.697145441507841    
        4.67400000     2536.097343490524         3.702545710506873    
        4.67780000     2528.095591688658         3.706807832959708    
        4.68160000     2529.286347319411         3.708740469424729    
        4.68540000     2527.523812813870         3.698394187975394    
        4.68920000     2527.049208462870         3.652864074059418    
        4.69300000     2525.136752801013         3.656307356518915    
        4.69680000     2527.018378491965         3.684382937431185    
        4.70060000     2524.684814816592         3.675413842042491    
        4.70440000     2529.177581481565         3.675181474011816    
        4.70820000     2523.539134218521         3.670785435196803    
        4.71200000     2521.591424644075         3.669338699811918    
        4.71580000     2522.148291055605         3.672778179824932    
        4.71960000     2527.527474229158         3.661120296885704    
        4.72340000     2525.523485181877         3.665582926613322    
        4.72720000     2524.443107992505         3.653556979861516    
        4.73100000     2526.319855840887         3.663998099907219    
        4.73480000     2526.354300542650         3.675010430914111    
        4.73860000     2524.126285156668         3.682004875053699    
        4.74240000     2524.349897071204         3.677134167092581    
        4.74620000     2524.679877486703         3.688426709162554    
        4.75000000     2530.617559241532         3.681799618453556    
        4.75380000     2525.527837430076         3.681264537407385    
        4.75760000     2526.041233515166         3.691821114176638    
        4.76140000     2522.285961123589         3.687976979809206    
        4.76520000     2523.845684573010         3.667031069389593    
        4.76900000     2521.252452781266         3.659883402476008    
        4.77280000     2520.527535262986         3.627628929493921    
        4.77660000     2524.430310574548         3.651955286849798    
        4.78040000     2528.087488018683         3.693606469336277    
        4.78420000     2524.288044146444         3.680321840098554    
        4.78800000     2527.635925459577         3.674784784276603    
        4.79180000     2525.231461154567         3.679521085524404    
        4.79560000     2526.523348757147         3.661468518763909    
        4.79940000     2528.011037478166         3.664291635896310    
        4.80320000     2532.527366163711         3.681169594918628    
        4.80700000     2530.544651947321         3.675984326867503    
        4.81080000     2537.528988720591         3.658798797313243    
        4.81460000     2540.716880747714         3.695090164870320    
        4.81840000     2550.660806854515         3.709451008982809    
        4.82220000     2554.197254837040         3.714378451438129    
        4.82600000     2561.530841957681         3.764152540149622    
        4.82980000     2564.220218588407         3.743645154806404    
        4.83360000     2575.361519817080         3.730673832200670    
        4.83740000     2585.497925777245         3.800768689282364    
        4.84120000     2601.401281697848         3.788345132212773    
        4.84500000     2617.801040475620         3.762346427327618    
        4.84880000     2633.072706581702         3.801765108642257    
        4.85260000     2650.333776269928         3.813859555794943    
        4.85640000     2669.480089307728         3.854941969237784    
        4.86020000     2689.283013799193         3.865449612921785    
        4.86400000     2700.893503799070         3.854025852971612    
        4.86780000     2718.098667294719         3.910155507908665    
        4.87160000     2725.837024619197         3.936728608754082    
        4.87540000     2729.198240040313         3.909569496673360    
        4.87920000     2735.159219018596         3.925951045828163    
        4.88300000     2734.082288266992         3.937040433292121    
        4.88680000     2721.318428995732         3.931101968796314    
        4.89060000     2714.756741257814         3.908807684711701    
        4.89440000     2702.557664840662         3.907320024922675    
        4.89820000     2689.600549248161         3.886416766947175    
        4.90200000     2678.477634660514         3.869390372820094    
        4.90580000     2665.508401668330         3.851840386456887    
        4.90960000     2659.267959249983         3.839063248327318    
        4.91340000     2653.751859302783         3.840719576236896    
        4.91720000     2656.941103865366         3.812974665455027    
        4.92100000     2652.300988416558         3.805411227321750    
        4.92480000     2662.977490298639         3.852773561869729    
        4.92860000     2674.732816722999         3.874456377021377    
        4.93240000     2694.207445907940         3.885385835306240    
        4.93620000     2717.698885555782         3.931553740554040    
        4.94000000     2748.063437742111         3.972060642842738    
        4.94380000     2776.926739667490         3.988789926351858    
        4.94760000     2805.191575779039         4.054074118510576    
        4.95140000     2836.026627176693         4.106988124571011    
        4.95520000     2860.540164477784         4.088561512650918    
        4.95900000     2879.304852183159         4.099900398585355    
        4.96280000     2888.456013920120         4.133525838613070    
        4.96660000     2886.666039462561         4.152121057466593    
        4.97040000     2872.941140874094         4.111039660575679    
        4.97420000     2856.841615123156         4.101509855382546    
        4.97800000     2831.505369111804         4.073840557541369    
        4.98180000     2802.938415639172         4.022140279111810    
        4.98560000     2768.861913309565         3.971675139908602    
        4.98940000     2732.426092945641         3.918355971508245    
        4.99320000     2692.702950502427         3.874618873319395    
        4.99700000     2661.570500528782         3.819421234998814    
        5.00080000     2637.097797316217         3.812045890014742    
        5.00460000     2619.697181176860         3.815910627855282    
        5.00840000     2603.252272420288         3.762508638921657    
        5.01220000     2583.454564450240         3.743490126469776    
        5.01600000     2573.737793290870         3.751448387295323    
        5.01980000     2567.046877496476         3.741745544183034    
        5.02360000     2557.138358612949         3.708328059717474    
        5.02740000     2549.411053494456         3.684944207617073    
        5.03120000     2544.196369308558         3.701843579002504    
        5.03500000     2544.933260398270         3.688124437506936    
        5.03880000     2540.768762256300         3.697816387534623    
        5.04260000     2526.844378577282         3.667791461734790    
        5.04640000     2522.073648749728         3.633589111932153    
        5.05020000     2521.228711880123         3.868749390106587    
        5.05400000     2524.594915174041         4.232470233394155    
        5.05780000     2523.332124577040         4.251673424176966    
        5.06160000     2516.300476785069         4.274894939339458    
        5.06540000     2520.033627934780         4.257542046015870    
        5.06920000     2513.177105659601         4.217316140617676    
        5.07300000     2513.993456204066         4.181162495655584    
        5.07680000     2511.926984277338         4.190613098523382    
        5.08060000     2510.067160094670         4.221962379832743    
        5.08440000     2510.513905024815         4.235245323436170    
        5.08820000     2509.397803912398         4.222426043179993    
        5.09200000     2506.922366131736         4.206482700225108    
        5.09580000     2500.525398957899         4.208213128962353    
        5.09960000     2501.016145514302         4.206213268830717    
        5.10340000     2502.264254916453         4.209683125955155    
        5.10720000     2494.702929413120         4.221169067204127    
        5.11100000     2496.646328271568         4.158785682663466    
        5.11480000     2497.891855873077         4.190963598931679    
        5.11860000     2498.152548147083         4.208739464014342    
        5.12240000     2492.626007847995         4.194697771770579    
        5.12620000     2498.576886399586         4.226520616571016    
        5.13000000     2494.531760241442         4.197199782931247    
        5.13380000     2493.532654909520         4.197779685949143    
        5.13760000     2489.645712132177         4.217283499849257    
        5.14140000     2497.058877331687         4.227357568439076    
        5.14520000     2488.189948027758         4.191325264234994    
        5.14900000     2491.492192620803         4.161886991059560    
        5.15280000     2491.606691089566         4.176989754052069    
        5.15660000     2491.722672581435         4.178908626526189    
        5.16040000     2490.724117665016         4.186242698185723    
        5.16420000     2489.557061256741         4.147229829671171    
        5.16800000     2493.411195016849         4.166279032478932    
        5.17180000     2494.974918763030         4.187786268905882    
        5.17560000     2495.372247313913         4.175407299673099    
        5.17940000     2485.729824450852         4.135269747624611    
        5.18320000     2492.037545321626         4.174712518956769    
        5.18700000     2485.611452774876         4.169381966862082    
        5.19080000     2485.088493773657         4.197910365511306    
        5.19460000     2487.472269819285         4.186685941357267    
        5.19840000     2484.404850127639         4.172493871807635    
        5.20220000     2490.759310671092         4.205271487097214    
        5.20600000     2488.204290203454         4.169859307440898    
        5.20980000     2491.091093884999         4.188167502953207    
        5.21360000     2489.092634975329         4.162706203694664    
        5.21740000     2491.281546803401         4.181690340791390    
        5.22120000     2492.656952698163         4.167161544058319    
        5.22500000     2487.638175724476         4.178709320276774    
        5.22880000     2489.890854521215         4.198679396267400    
        5.23260000     2486.864143200574         4.149683457201792    
        5.23640000     2492.251720711859         4.200857694500368    
        5.24020000     2495.198493203488         3.821345919333318    
        5.24400000     2497.078882809058         3.609818921635007    
        5.24780000     2497.171452157936         3.620450609295569    
        5.25160000     2499.575491639883         3.647990070347678    
        5.25540000     2496.322547119190         3.632290692476178    
        5.25920000     2494.451333491451         3.617435079807258    
        5.26300000     2499.175103459714         3.634418461611497    
        5.26680000     2495.023514499876         3.658979759094874    
        5.27060000     2491.838094946279         3.637459849667956    
        5.27440000     2493.703399683954         3.618867330377942    
        5.27820000     2490.625167104981         3.621089775960654    
        5.28200000     2495.291590145505         3.620275126452656    
        5.28580000     2492.976020296637         3.616372993803212    
        5.28960000     2490.244703381042         3.586756934692148    
        5.29340000     2490.800946480062         3.612097807776069    
        5.29720000     2491.991376574277         3.624409199286185    
        5.30100000     2490.584737274898         3.627658423126594    
        5.30480000     2490.928555789859         3.613634811584022    
        5.30860000     2492.447933154264         3.627655872032151    
        5.31240000     2497.094633948152         3.644330898320075    
        5.31620000     2495.063669238873         3.642581441984909    
        5.32000000     2493.395139311563         3.637557786633828    
        5.32380000     2496.223676649227         3.653812457590353    
        5.32760000     2490.616397462612         3.644835340604544    
        5.33140000     2491.232513325667         3.626963899977319    
        5.33520000     2496.116291800506         3.617426531392030    
        5.33900000     2495.544474936813         3.633907976588361    
        5.34280000     2495.995470038990         3.628615969041850    
        5.34660000     2488.904425956800         3.583698548842262    
        5.35040000     2484.828214345061         3.804295946067899    
        5.35420000     2488.589776301189         4.209573314471840    
        5.35800000     2486.733141652148         4.216047691662830    
        5.36180000     2489.853177371869         4.206442287948866    
        5.36560000     2484.379385002573         4.188301607668143    
        5.36940000     2484.208405250159         4.156157408025663    
        5.37320000     2481.708389208498         4.158058357127427    
        5.37700000     2481.003167720264         4.160852065243032    
        5.38080000     2475.745581123339         4.186247279267253    
        5.38460000     2477.987791954172         4.169407561324975    
        5.38840000     2479.755553133764         4.182255645097917    
        5.39220000     2475.015099228516         4.162304184090491    
        5.39600000     2477.288635184881         4.178064513481378    
        5.39980000     2477.553479475709         4.173449976083832    
        5.40360000     2477.562868084100         4.187106951361303    
        5.40740000     2477.142538459092         4.158265114866923    
        5.41120000     2473.734890164022         4.152387569459387    
        5.41500000     2472.612981287664         4.164438692298773    
        5.41880000     2479.326716309728         4.175416619728303    
        5.42260000     2481.103028905276         4.157532681668463    
        5.42640000     2473.723809690313         4.189521349408973    
        5.43020000     2476.498616921708         4.168936294917284    
        5.43400000     2473.460817602816         4.123152733218104    
        5.43780000     2471.126201101902         4.180536196602568    
        5.44160000     2473.431442305119         4.203033551673938    
        5.44540000     2473.152089243448         4.161090928381475    
        5.44920000     2468.365721612800         4.167318060293953    
        5.45300000     2468.623568120071         4.158981863136439    
        5.45680000     2471.451150102230         4.163602152518797    
        5.46060000     2476.497285756836         4.142006783064777    
        5.46440000     2473.324614157821         4.134402320159483    
        5.46820000     2474.859919644385         4.150760448162452    
        5.47200000     2475.430229452355         4.186160965618795    
        5.47580000     2474.923383811055         4.157140565684892    
        5.47960000     2470.304209167191         4.136004496066276    
        5.48340000     2471.550432564107         4.123839080018374    
        5.48720000     2473.188784226686         4.177145713893255    
        5.49100000     2472.045305493089         4.182620334276833    
        5.49480000     2470.423916229779         4.176363860906243    
        5.49860000     2473.664815773121         4.179245984551046    
        5.50240000     2471.711636816293         4.149045636603950    
        5.50620000     2478.249386728683         4.156202542884897    
        5.51000000     2474.892861353832         4.162992683906666    
        5.51380000     2468.715896078540         4.167320348409683    
        5.51760000     2475.399680847725         4.151806183475571    
        5.52140000     2473.153891993986         4.126092951504230    
        5.52520000     2468.610309970310         4.128006890341792    
        5.52900000     2469.580774515404         4.143851919509148    
        5.53280000     2476.059715166094         4.159959833545527    
        5.53660000     2473.960234950281         4.133160182951259    
        5.54040000     2471.760969325601         3.770603462006799    
        5.54420000     2476.311703464114         3.596534851366600    
        5.54800000     2473.100868745229         3.587570387419358    
        5.55180000     2474.217155043360         3.613478518542315    
        5.55560000     2476.729315162182         3.618847415045231    
        5.55940000     2477.500097024876         3.606431134655085    
        5.56320000     2480.311011258348         3.610807799098624    
        5.56700000     2479.325538482349         3.611327029499963    
        5.57080000     2475.819664951578         3.619069488256671    
        5.57460000     2474.075487952724         3.592541361606568    
        5.57840000     2474.619898640896         3.604316312806780    
        5.58220000     2478.424740278918         3.602821357612257    
        5.58600000     2475.365139802918         3.594708010746903    
        5.58980000     2473.625364622396         3.579028315413749    
        5.59360000     2471.976327581495         3.598262552078153    
        5.59740000     2471.858250688053         3.601719444751116    
        5.60120000     2465.673905546591         3.587753182546728    
        5.60500000     2466.884709972848         3.584136248375521    
        5.60880000     2466.600195879138         3.596778176180076    
        5.61260000     2469.642556569715         3.583089131691823    
        5.61640000     2467.081893782167         3.606800116339131    
        5.62020000     2464.863388789001         3.597991329413141    
        5.62400000     2463.058944348129         3.592939892041009    
        5.62780000     2459.658968767338         3.577197728549753    
        5.63160000     2460.358167711157         3.599054281226779    
        5.63540000     2460.671409062546         3.594932870000740    
        5.63920000     2461.164700775307         3.565754065913151    
        5.64300000     2461.917361861475         3.587526585495302    
        5.64680000     2456.880065090189         3.565869771664715    
        5.65060000     2456.696697711238         3.597522325468636    
        5.65440000     2456.171170866621         3.828341646185020    
        5.65820000     2459.942024277604         4.152697606026746    
        5.66200000     2466.045364457853         4.146910747794258    
        5.66580000     2456.957636059803         4.145494574502927    
        5.66960000     2456.007336646171         4.125013500480340    
        5.67340000     2459.596122361263         4.156733320296406    
        5.67720000     2455.702630224227         4.137858707854038    
        5.68100000     2451.957581037629         4.140373511063923    
        5.68480000     2456.705939220634         4.123784388932458    
        5.68860000     2457.275784593837         4.130532567734806    
        5.69240000     2453.376431417236         4.146214904764796    
        5.69620000     2448.816705451436         4.149466394595250    
        5.70000000     2452.655540616070         4.177358064751792    
        5.70380000     2449.025099115405         4.148515782063417    
        5.70760000     2445.578255141822         4.113676199572515    
        5.71140000     2450.009793808759         4.116985896521194    
        5.71520000     2448.122527291372         4.148384150942998    
        5.71900000     2450.670329009891         4.145524300597291    
        5.72280000     2449.798395573772         4.095243860687559    
        5.72660000     2447.156625520026         4.139284446537122    
        5.73040000     2445.493444879482         4.100978546730612    
        5.73420000     2443.662847703650         4.080294187128163    
        5.73800000     2445.124348144883         4.119836626573155    
        5.74180000     2445.881040114282         4.129906824114052    
        5.74560000     2444.393637338602         4.103697266884803    
        5.74940000     2443.927302424850         4.114246067117757    
        5.75320000     2445.006811433070         4.117529714699992    
        5.75700000     2442.522557826457         4.120157963589991    
        5.76080000     2447.630442310527         4.114432080421721    
        5.76460000     2442.941198289905         4.105504138528542    
        5.76840000     2443.489465241947         4.141164468936503    
        5.77220000     2440.661416491689         4.142667700110823    
        5.77600000     2438.473477518049         4.110883844448157    
        5.77980000     2441.189539827319         4.091586495874671    
        5.78360000     2445.338276828040         4.085644967903904    
        5.78740000     2443.434622164310         4.131840233921558    
        5.79120000     2440.807946331892         4.138353157661002    
        5.79500000     2438.858971797291         4.145054122943736    
        5.79880000     2438.616119952982         4.125219126109356    
        5.80260000     2442.726908361258         4.120119823827299    
        5.80640000     2443.816248448307         4.092303016243895    
        5.81020000     2438.899875211572         4.102325006116486    
        5.81400000     2436.957312466914         4.118737522187039    
        5.81780000     2445.350045260223         4.125899041808703    
        5.82160000     2443.948843774419         4.126224444374420    
        5.82540000     2441.602447107015         4.107777592570107    
        5.82920000     2441.543075260446         4.107798894366272    
        5.83300000     2436.800038588930         4.060207856946374    
        5.83680000     2438.609394411384         4.072887288457186    
        5.84060000     2439.071489181538         3.986178352820404    
        5.84440000     2441.195115713004         3.726113450513496    
        5.84820000     2444.465344924833         3.547909691256648    
        5.85200000     2445.428212857038         3.553414168368298    
        5.85580000     2444.768142785117         3.555575619504722    
        5.85960000     2445.069811700233         3.543757141581023    
        5.86340000     2447.375020351858         3.532471886592332    
        5.86720000     2444.866785019954         3.538659466651908    
        5.87100000     2437.097705204279         3.546955136870767    
        5.87480000     2434.991079923156         3.557182180350441    
        5.87860000     2436.491630314458         3.553727532212745    
        5.88240000     2436.599486765921         3.552811463332310    
        5.88620000     2441.725905865257         3.579689507983919    
        5.89000000     2439.894684195942         3.562890267054994    
        5.89380000     2440.138901882636         3.561826847536659    
        5.89760000     2439.567493978758         3.568626228587238    
        5.90140000     2438.389502246057         3.558443315804198    
        5.90520000     2437.611336867561         3.546023933039147    
        5.90900000     2434.594327255240         3.538381130278879    
        5.91280000     2437.931472457451         3.544051355658361    
        5.91660000     2439.820578738256         3.573729646627675    
        5.92040000     2441.012476868840         3.579775227121468    
        5.92420000     2440.486834017541         3.568818148680631    
        5.92800000     2437.164979428068         3.563655985388335    
        5.93180000     2435.299761957424         3.564374646527674    
        5.93560000     2434.319319551967         3.543694874717095    
        5.93940000     2436.451981131077         3.557839013957062    
        5.94320000     2436.101208911507         3.548187226371502    
        5.94700000     2435.033810699754         3.518122897576391    
        5.95080000     2431.078020618544         3.709707413977741    
        5.95460000     2433.260442791886         3.988516629789988    
        5.95840000     2438.310555509399         4.105554199037766    
        5.96220000     2437.326667720150         4.111953867722575    
        5.96600000     2441.123308470516         4.110180635626199    
        5.96980000     2438.464781545685         4.108133162022520    
        5.97360000     2437.665161362900         4.127748503434860    
        5.97740000     2435.969214202597         4.115957470461364    
        5.98120000     2431.257342932870         4.093072248655703    
        5.98500000     2432.722898586660         4.101339829433059    
        5.98880000     2430.547255353113         4.107311580854657    
        5.99260000     2430.336862939455         4.118616826681847    
        5.99640000     2429.795112825704         4.107391146640959    
        6.00020000     2427.549528984285         4.112480377119722    
        6.00400000     2430.152269124211         4.125378688416347    
        6.00780000     2428.244521021418         4.122280793132362    
        6.01160000     2427.072515373753         4.090372302574600    
        6.01540000     2426.449854471000         4.088365446798490    
        6.01920000     2427.254974395773         4.149674813813169    
        6.02300000     2428.831943376731         4.112782900131737    
        6.02680000     2429.817535254905         4.105277631598033    
        6.03060000     2423.233376986344         4.077135999748233    
        6.03440000     2430.891709093286         4.080587820143530    
        6.03820000     2430.495496090767         4.044586686437389    
        6.04200000     2432.907402147345         4.110649793067279    
        6.04580000     2425.242963405641         4.110596065991052    
        6.04960000     2422.683464260330         4.071175939465372    
        6.05340000     2420.915916955801         4.077484523568351    
        6.05720000     2424.963138119412         4.105069237696186    
        6.06100000     2428.469516306021         4.113066360068147    
        6.06480000     2426.227190827819         4.113854828886632    
        6.06860000     2421.309203218430         4.104587082986021    
        6.07240000     2423.770195947029         4.126209948024528    
        6.07620000     2423.880646986360         4.097772366018932    
        6.08000000     2424.359975759371         4.071222599422581    
        6.08380000     2424.787161032068         4.077174631705317    
        6.08760000     2423.859378091000         4.078726527517733    
        6.09140000     2427.055468963455         4.117336555081601    
        6.09520000     2424.830269723154         4.107253937511342    
        6.09900000     2420.372778225382         4.109442354758690    
        6.10280000     2421.629188078940         4.092436909005343    
        6.10660000     2421.058073025101         4.073534412863898    
        6.11040000     2423.630103384002         4.077243705131241    
        6.11420000     2418.139612726177         4.091936348314314    
        6.11800000     2417.570078081753         4.101980692481540    
        6.12180000     2425.195104938802         4.141711596548799    
        6.12560000     2423.121006663459         4.076600676290486    
        6.12940000     2419.663789402484         4.052114530151920    
        6.13320000     2417.980096340366         4.071187426609158    
        6.13700000     2418.095047311357         4.062865378182592    
        6.14080000     2418.902480349182         3.776191225104223    
        6.14460000     2424.461650424905         3.578887909745118    
        6.14840000     2423.620244689931         3.517098774457554    
        6.15220000     2423.493940108588         3.520128818112118    
        6.15600000     2421.647296227616         3.526584211608836    
        6.15980000     2420.783410220214         3.511783180980408    
        6.16360000     2420.416604958534         3.503405295382575    
        6.16740000     2419.480001355666         3.520475952914531    
        6.17120000     2419.876012977402         3.554671989214453    
        6.17500000     2419.713403972776         3.530508420632792    
        6.17880000     2420.989100865611         3.515330975571715    
        6.18260000     2422.862155171053         3.525352763071511    
        6.18640000     2421.491728763868         3.551509259829949    
        6.19020000     2422.404965868542         3.557777121411596    
        6.19400000     2426.295246316648         3.558548593720764    
        6.19780000     2430.772244010181         3.567189378749927    
        6.20160000     2428.304926989045         3.554098570293090    
        6.20540000     2426.597626336643         3.532423792333627    
        6.20920000     2426.978342214788         3.541538589004732    
        6.21300000     2427.592418774590         3.529508077679801    
        6.21680000     2425.945076861561         3.533007761604847    
        6.22060000     2422.471902016973         3.549917880499095    
        6.22440000     2421.399741716410         3.538154504635566    
        6.22820000     2421.909115330300         3.521182345768128    
        6.23200000     2424.261801836049         3.534916249984486    
        6.23580000     2421.898834584739         3.550593078383260    
        6.23960000     2419.279322904457         3.539282825774571    
        6.24340000     2421.943364355501         3.524683663952787    
        6.24720000     2419.441935005785         3.508294310740572    
        6.25100000     2415.664098098331         3.498397794887400    
        6.25480000     2420.948022767983         3.528841961245231    
        6.25860000     2421.033781529246         3.518646432852697    
        6.26240000     2423.738271041184         3.527973528618501    
        6.26620000     2419.291965657507         3.539708708212711    
        6.27000000     2416.615991423469         3.522703256097072    
        6.27380000     2419.678702175729         3.533391874024449    
        6.27760000     2416.149765609280         3.537328082877746    
        6.28140000     2414.811987127443         3.527982087047178    
        6.28520000     2410.626088812347         3.515343000637528    
        6.28900000     2416.053942589552         3.557745833570682    
        6.29280000     2417.166908372899         3.544863833515130    
        6.29660000     2413.020381989961         3.538301275221017    
        6.30040000     2414.070629754371         3.520841909145564    
        6.30420000     2416.669656827833         3.554231745853765    
        6.30800000     2413.089733671530         3.548812157325118    
        6.31180000     2415.308978531592         3.517293928004959    
        6.31560000     2414.950287575994         3.528806838824672    
        6.31940000     2416.323596723845         3.564613353274008    
        6.32320000     2419.648217558517         3.544820686208815    
        6.32700000     2423.365841133911         3.542480152459905    
        6.33080000     2419.485670569879         3.514503012967994    
        6.33460000     2423.505551824408         3.515277904300683    
        6.33840000     2423.486617442385         3.515678185455581    
        6.34220000     2423.544055309949         3.527228314830144    
        6.34600000     2428.748538087742         3.537471447024107    
        6.34980000     2427.696077118080         3.550794861320737    
        6.35360000     2430.868571371865         3.540403419291524    
        6.35740000     2436.635705070634         3.547766624320184    
        6.36120000     2444.738954993287         3.570448176850346    
        6.36500000     2446.487320803545         3.594921566331019    
        6.36880000     2456.178584027326         3.609489116084103    
        6.37260000     2462.382865133429         3.629376207464037    
        6.37640000     2468.941571002342         3.590646097436315    
        6.38020000     2485.020125424887         3.616538695184786    
        6.38400000     2503.427753131563         3.629871595961818    
        6.38780000     2512.893511156177         3.643862859464772    
        6.39160000     2532.192636015656         3.697306539065903    
        6.39540000     2549.822306022196         3.707199721631014    
        6.39920000     2573.596588407703         3.758277241899354    
        6.40300000     2595.294514189062         3.776564965424998    
        6.40680000     2621.255344641223         3.767094727535915    
        6.41060000     2647.590906410215         3.833718722572366    
        6.41440000     2679.212301060059         3.880912547700732    
        6.41820000     2708.457229579581         3.917357820066667    
        6.42200000     2742.187545684466         3.976337626099237    
        6.42580000     2766.125801103699         3.986093779797567    
        6.42960000     2791.301759392401         3.999827667160361    
        6.43340000     2811.163522098916         4.031846101204007    
        6.43720000     2831.629744262169         4.045039927098091    
        6.44100000     2840.706470395975         4.058448040784745    
        6.44480000     2851.116078619088         4.086588341411038    
        6.44860000     2854.748137996393         4.066731768845329    
        6.45240000     2861.205333333247         4.074708693882612    
        6.45620000     2859.487681191324         4.082103365160295    
        6.46000000     2857.873779139282         4.086950180779138    
        6.46380000     2858.423304009492         4.063938857140711    
        6.46760000     2858.672827360409         4.060760937177573    
        6.47140000     2854.173934637836         4.094307966678583    
        6.47520000     2856.593093250450         4.082852894584780    
        6.47900000     2859.695917111203         4.081002306573228    
        6.48280000     2864.416809067479         4.093733100444847    
        6.48660000     2876.346787956537         4.146323911497105    
        6.49040000     2893.128725206484         4.149559615241871    
        6.49420000     2912.161146762731         4.177868781021144    
        6.49800000     2927.905916144965         4.196936709775249    
        6.50180000     2949.551365066642         4.222902824313181    
        6.50560000     2969.349121074210         4.239253004513234    
        6.50940000     2990.547786744040         4.246448346837902    
        6.51320000     3005.707731311127         4.249021033143319    
        6.51700000     3018.998045533580         4.279831696348036    
        6.52080000     3025.974808093602         4.294012375168450    
        6.52460000     3026.468910515917         4.323664555985361    
        6.52840000     3020.483369690749         4.307996569779803    
        6.53220000     3001.388623146744         4.293207048778455    
        6.53600000     2966.735226607846         4.260526527026532    
        6.53980000     2931.359650025313         4.176271674544465    
        6.54360000     2890.759323638998         4.124393771194018    
        6.54740000     2841.682851195135         4.070888644388557    
        6.55120000     2787.324449446846         3.974089848996672    
        6.55500000     2739.899938403782         3.920664524162802    
        6.55880000     2696.758224568534         3.864819858256726    
        6.56260000     2657.546352991944         3.826664743634915    
        6.56640000     2617.763738622893         3.797262129250155    
        6.57020000     2579.744992521054         3.742491767851172    
        6.57400000     2550.803325095332         3.691668261839205    
        6.57780000     2527.055070664843         3.668658654700909    
        6.58160000     2506.274642527027         3.634870063837922    
        6.58540000     2492.926134070405         3.618804380234006    
        6.58920000     2478.445226309324         3.620229581755596    
        6.59300000     2467.617456076347         3.624692672533350    
        6.59680000     2460.510641662923         3.610629055903766    
        6.60060000     2455.745949169681         3.569144120780551    
        6.60440000     2450.951603356756         3.576714258619827    
        6.60820000     2446.556123242528         3.562717418764491    
        6.61200000     2445.223042921964         3.564099115918243    
        6.61580000     2447.541971721076         3.574501653279380    
        6.61960000     2446.029425242221         3.577377468678295    
        6.62340000     2444.357104923051         3.571132102982685    
        6.62720000     2446.468857522150         3.562198202551573    
        6.63100000     2448.542484535978         3.550568723678603    
        6.63480000     2449.298983170451         3.553953434246669    
        6.63860000     2455.667924909081         3.564438748055923    
        6.64240000     2459.400251141668         3.568779849627167    
        6.64620000     2462.340678281317         3.578673657682828    
        6.65000000     2462.320838102511         3.599578896693058    
        6.65380000     2463.993918353498         3.589363023908652    
        6.65760000     2465.226413952859         3.582025090177636    
        6.66140000     2466.606212201355         3.617859033489873    
        6.66520000     2458.641578033620         3.611971935029288    
        6.66900000     2458.866695079973         3.621650729294621    
        6.67280000     2458.923109585680         3.605429523319772    
        6.67660000     2458.859013839396         3.592470727832775    
        6.68040000     2456.153846248634         3.592466562248463    
        6.68420000     2455.452979255736         3.548719699169880    
        6.68800000     2451.948428289915         3.569974308495012    
        6.69180000     2450.279824404087         3.593953877136151    
        6.69560000     2444.946007098430         3.570810159030139    
        6.69940000     2442.231128262498         3.557120660125721    
        6.70320000     2430.426589941124         3.583347670059344    
        6.70700000     2429.712453029967         3.534900684523814    
        6.71080000     2423.566118711286         3.525296713360146    
        6.71460000     2416.441569854805         3.529585685648858    
        6.71840000     2414.037503413828         3.517977777818695    
        6.72220000     2413.314727641841         3.553984487485724    
        6.72600000     2411.016682561104         3.530272172202571    
        6.72980000     2408.958927314283         3.518975584310770    
        6.73360000     2407.638181750006         3.497356086098987    
        6.73740000     2401.209327336872         3.489380434723265    
        6.74120000     2394.722391919487         3.499519072418599    
        6.74500000     2396.095442340925         3.517663607936320    
        6.74880000     2389.753396257332         3.488132706015504    
        6.75260000     2387.620968359287         3.461491094453326    
        6.75640000     2387.635669819546         3.515001535523970    
        6.76020000     2384.219000053842         3.490579940033067    
        6.76400000     2381.083961082912         3.445165272866042    
        6.76780000     2380.484580259401         3.466370307850584    
        6.77160000     2377.970939941692         3.483039146946213    
        6.77540000     2379.546308494554         3.496316886563848    
        6.77920000     2377.788416119070         3.490987474432855    
        6.78300000     2374.021490864362         3.475577994482240    
        6.78680000     2374.821391492717         3.490479361700111    
        6.79060000     2375.581887591724         3.481847788498251    
        6.79440000     2376.366398985439         3.489237905943229    
        6.79820000     2379.474151515450         3.504886880323884    
        6.80200000     2383.861462011656         3.509676356359298    
        6.80580000     2379.520339949311         3.492105953576710    
        6.80960000     2376.913609078875         3.472075029163511    
        6.81340000     2375.652897796277         3.486076878883671    
        6.81720000     2375.940590451959         3.479307690283558    
        6.82100000     2378.342592906241         3.489029417213858    
        6.82480000     2379.111949908129         3.508536547243545    
        6.82860000     2378.000182805607         3.500113165008520    
        6.83240000     2373.239217137505         3.464430528079592    
        6.83620000     2370.529428947148         3.480675134425851    
        6.84000000     2367.502685694169         3.490125957171732    
        6.84380000     2369.221294983815         3.463991753646480    
        6.84760000     2368.378369556473         3.461318707353697    
        6.85140000     2364.500626859548         3.463961607622969    
        6.85520000     2363.774840163852         3.435884124597081    
        6.85900000     2361.842176065262         3.448990510589821    
        6.86280000     2358.721716350797         3.448891952068339    
        6.86660000     2361.460897019377         3.455047874361397    
        6.87040000     2364.471063513166         3.470906632101646    
        6.87420000     2360.473085421344         3.453529266967283    
        6.87800000     2357.200141192205         3.429781194331393    
        6.88180000     2356.310961458370         3.445952348614148    
        6.88560000     2357.654841589093         3.454855311534607    
        6.88940000     2359.226007144942         3.470568397737356    
        6.89320000     2356.005985201572         3.469616790151086    
        6.89700000     2353.422044281752         3.463228886343371    
        6.90080000     2354.336114396187         3.441940867671970    
        6.90460000     2356.813243102330         3.458662460587143    
        6.90840000     2354.680784115058         3.465625677218392    
        6.91220000     2356.621292751158         3.447910363960758    
        6.91600000     2356.063196353872         3.444510323459669    
        6.91980000     2351.485321352085         3.472169132000128    
        6.92360000     2353.499242321242         3.474195479138027    
        6.92740000     2355.335685174564         3.456883528850339    
        6.93120000     2351.726467400091         3.427077521324810    
        6.93500000     2353.049813313130         3.438216778225045    
        6.93880000     2352.539694945639         3.441090573026367    
        6.94260000     2349.313341293699         3.433304855829044    
        6.94640000     2350.067414357677         3.457607515344711    
        6.95020000     2352.138643643795         3.434217370818254    
        6.95400000     2347.780999440359         3.450660613000509    
        6.95780000     2348.669023583386         3.451303615022284    
        6.96160000     2351.517781753212         3.444004405434842    
        6.96540000     2347.673264565441         3.484385600670623    
        6.96920000     2343.810931618706         3.467161767134137    
        6.97300000     2347.222693105216         3.474700721040335    
        6.97680000     2346.474167454069         3.469650094689438    
        6.98060000     2350.647542808443         3.445668996975160    
        6.98440000     2353.850954834459         3.443377823882643    
        6.98820000     2349.419577968020         3.441247358566806    
        6.99200000     2349.556789505368         3.459706829734072    
        6.99580000     2346.057555580092         3.446109624215030    
        6.99960000     2347.859166327940         3.451151019135729    
        7.00340000     2348.835021664763         3.474629348006356    
        7.00720000     2347.400899937911         3.451228402159070    
        7.01100000     2344.705818306351         3.433707878038836    
        7.01480000     2344.829664723711         3.452384300932327    
        7.01860000     2343.514753183839         3.440937030846798    
        7.02240000     2349.007550512098         3.461818367673989    
        7.02620000     2345.528447171310         3.452784036936066    
        7.03000000     2343.201305545752         3.446320193219468    
        7.03380000     2343.816882091617         3.437291815221900    
        7.03760000     2342.935083170648         3.436380349811051    
        7.04140000     2344.781229436125         3.450687334420888    
        7.04520000     2345.548396247227         3.461141593110998    
        7.04900000     2341.815315558078         3.421597644254732    
        7.05280000     2338.110290361266         3.425079283941687    
        7.05660000     2342.723867002424         3.440288989493295    
        7.06040000     2343.842964179339         3.435445399284971    
        7.06420000     2336.959195940029         3.443684378320065    
        7.06800000     2341.400664293220         3.435649183298857    
        7.07180000     2343.819719970714         3.465880457566344    
        7.07560000     2342.594734656688         3.447367491365527    
        7.07940000     2340.327505460451         3.434072367162541    
        7.08320000     2340.240739197187         3.416305250232622    
        7.08700000     2338.069565800923         3.441397727501902    
        7.09080000     2336.176930897085         3.441809529647174    
        7.09460000     2338.200328134594         3.411360630013906    
        7.09840000     2341.725104662369         3.449485188067144    
        7.10220000     2337.422077579305         3.458364924377298    
        7.10600000     2341.876050791338         3.447932383664448    
        7.10980000     2335.157191006137         3.416495993737998    
        7.11360000     2335.459855882780         3.441246987899131    
        7.11740000     2332.899802824624         3.435636139740251    
        7.12120000     2338.696819204471         3.427219746839944    
        7.12500000     2334.915087998396         3.426755463457044    
        7.12880000     2332.587462841107         3.418698890597929    
        7.13260000     2334.348784489127         3.429358061845655    
        7.13640000     2336.314339034503         3.465027530616220    
        7.14020000     2333.381464847115         3.434936430431351    
        7.14400000     2332.817303375024         3.428224977024724    
        7.14780000     2330.627640181203         3.435800240920365    
        7.15160000     2332.527441667486         3.427315270020388    
        7.15540000     2329.093707642444         3.403587772143027    
        7.15920000     2335.049224138390         3.421901460930202    
        7.16300000     2336.987567478748         3.430163666368163    
        7.16680000     2332.801544608127         3.425024112434571    
        7.17060000     2334.142778150704         3.432529323563899    
        7.17440000     2331.181118112898         3.398564094949911    
        7.17820000     2326.435123714255         3.379315443886477    
        7.18200000     2328.049701750227         3.403809655050213    
        7.18580000     2331.524490809198         3.422206487577205    
        7.18960000     2332.247921699621         3.438363445278609    
        7.19340000     2328.292238051219         3.417642267873128    
        7.19720000     2325.735980332084         3.421305228028149    
        7.20100000     2330.661213241409         3.437018838976967    
        7.20480000     2331.328575821933         3.427049910737068    
        7.20860000     2328.935999690782         3.414745025592594    
        7.21240000     2328.598509903041         3.411916003096106    
        7.21620000     2328.248140908291         3.398346872223358    
        7.22000000     2328.470711443841         3.428621047696396    
        7.22380000     2329.895388868689         3.430959526901389    
        7.22760000     2329.669807772838         3.430125960816719    
        7.23140000     2327.613778553530         3.411138194969073    
        7.23520000     2325.673279652524         3.396688222461432    
        7.23900000     2325.910563361432         3.395556957726263    
        7.24280000     2325.489760922510         3.391010904329811    
        7.24660000     2325.062788370454         3.376896171743629    
        7.25040000     2322.993528123830         3.418511667014455    
        7.25420000     2322.048454570926         3.424638862566435    
        7.25800000     2323.844502377759         3.421336392884845    
        7.26180000     2326.283570524584         3.436511794866171    
        7.26560000     2319.906050559648         3.425133578385855    
        7.26940000     2320.507279034651         3.425801546435103    
        7.27320000     2323.082565018804         3.439198170507847    
        7.27700000     2327.556796200578         3.411450658714128    
        7.28080000     2328.258966478732         3.424383141958438    
        7.28460000     2329.934747792882         3.422823302955324    
        7.28840000     2325.839239035161         3.400116520320777    
        7.29220000     2328.252124839663         3.419423579750064    
        7.29600000     2327.918736424975         3.439441319119220    
        7.29980000     2332.052591274632         3.426659945820058    
        7.30360000     2328.065534247320         3.426405745095676    
        7.30740000     2329.379276649760         3.434741096326329    
        7.31120000     2325.095545474897         3.410637075012203    
        7.31500000     2330.071388610714         3.421962436877523    
        7.31880000     2327.398000667655         3.411448756096455    
        7.32260000     2325.674958273916         3.426705241261218    
        7.32640000     2327.649007440760         3.430241693031421    
        7.33020000     2327.278934158490         3.409502547065553    
        7.33400000     2326.991723031114         3.411134717997593    
        7.33780000     2329.200690294059         3.404599822692639    
        7.34160000     2327.936238591891         3.417056552327967    
        7.34540000     2329.942525092573         3.420884947644147    
        7.34920000     2325.051504341184         3.405452932922043    
        7.35300000     2324.756773428235         3.404977872631244    
        7.35680000     2324.216994335824         3.410491965846422    
        7.36060000     2327.409395252593         3.435925810072372    
        7.36440000     2322.394304558621         3.413545574170020    
        7.36820000     2322.384032960822         3.412751306509993    
        7.37200000     2324.250049250069         3.441067028384446    
        7.37580000     2324.063311416476         3.407975097127796    
        7.37960000     2324.903624342792         3.429181832265256    
        7.38340000     2326.166664683216         3.397299184819233    
        7.38720000     2320.378322346786         3.410177025624161    
        7.39100000     2318.124790835225         3.409281367990315    
        7.39480000     2323.681830283173         3.418348577328310    
        7.39860000     2322.074907499965         3.397600764175979    
        7.40240000     2321.507289950318         3.426382173664359    
        7.40620000     2322.811143172090         3.413739517820737    
        7.41000000     2321.848060105745         3.401698086848106    
        7.41380000     2318.365462323505         3.418757238968552    
        7.41760000     2319.743994030552         3.420877231411276    
        7.42140000     2324.392150219403         3.404067577288945    
        7.42520000     2322.802712687572         3.426676453101283    
        7.42900000     2325.114632769149         3.423489128186563    
        7.43280000     2321.975641322600         3.443196736205635    
        7.43660000     2324.301308227381         3.436439521828045    
        7.44040000     2318.116320735235         3.421308733586768    
        7.44420000     2320.186527545406         3.407835461166719    
        7.44800000     2319.364804607102         3.429287549697761    
        7.45180000     2321.744399401020         3.439523048886704    
        7.45560000     2326.175585599839         3.436184231703952    
        7.45940000     2323.404122232800         3.405385126881997    
        7.46320000     2324.687008713347         3.438623027534013    
        7.46700000     2320.072820751157         3.414798475680836    
        7.47080000     2326.448199525523         3.420853762384108    
        7.47460000     2325.140684565020         3.385885519991114    
        7.47840000     2326.400290463647         3.395799017819866    
        7.48220000     2322.034836411613         3.377426700759137    
        7.48600000     2320.615533428540         3.418926101176035    
        7.48980000     2324.136952471502         3.415337630938352    
        7.49360000     2320.736670026894         3.420419671944940    
        7.49740000     2322.964016687635         3.404804976720624    
        7.50120000     2327.973596401718         3.410098651780739    
        7.50500000     2330.208591972887         3.431717169765961    
        7.50880000     2328.671179730125         3.401896520687401    
        7.51260000     2335.489833607530         3.407391672220781    
        7.51640000     2340.262357338838         3.438530971398527    
        7.52020000     2345.827238256945         3.453844364852477    
        7.52400000     2350.886407113736         3.455080527239039    
        7.52780000     2363.764523443295         3.473269403072048    
        7.53160000     2368.147948013508         3.481175705976181    
        7.53540000     2372.672173104565         3.470821251861946    
        7.53920000     2376.997781257009         3.480590350985568    
        7.54300000     2386.259672771746         3.477550764451172    
        7.54680000     2392.458620974959         3.517857895767384    
        7.55060000     2401.860067316256         3.500081065109947    
        7.55440000     2408.365334914441         3.507517969165906    
        7.55820000     2418.838699029507         3.553479157966007    
        7.56200000     2432.472267102828         3.561423755887487    
        7.56580000     2451.942084093178         3.590198663043667    
        7.56960000     2478.404981134449         3.612048122136186    
        7.57340000     2517.552469684137         3.687790647268296    
        7.57720000     2569.650136715452         3.902746146950608    
        7.58100000     2637.413492644710         4.204773035587571    
        7.58480000     2710.291694829286         4.385492081697064    
        7.58860000     2796.422732773302         4.821545248843168    
        7.59240000     2890.574116203920         4.934282470116752    
        7.59620000     2984.716248651161         5.028240882963313    
        7.60000000     3087.064980632773         5.180103385515134    
        7.60380000     3181.946107744305         5.018233754301239    
        7.60760000     3259.454700316945         4.613592073115274    
        7.61140000     3314.540138155780         4.660991706955331    
        7.61520000     3348.163852148378         4.688842749559980    
        7.61900000     3346.866048374595         4.692619465805432    
        7.62280000     3323.622863650829         4.690180818575697    
        7.62660000     3276.244515610334         4.605227328562965    
        7.63040000     3205.390985746349         4.600263258313867    
        7.63420000     3124.871359555970         4.811031790488590    
        7.63800000     3037.177083604027         4.822161839902857    
        7.64180000     2943.491395486240         4.832594758291815    
        7.64560000     2856.573797483463         4.703835328649791    
        7.64940000     2766.909767503978         4.263056609477915    
        7.65320000     2690.375147714842         4.128172116936693    
        7.65700000     2626.849228068269         3.790849781269797    
        7.66080000     2574.636092004446         3.712294746930992    
        7.66460000     2522.718590462645         3.647251053547572    
        7.66840000     2483.732716737414         3.612695805445996    
        7.67220000     2454.063291696010         3.585184087837989    
        7.67600000     2426.402974325003         3.546056315331972    
        7.67980000     2405.069901571652         3.500769866190270    
        7.68360000     2388.933621674870         3.473143338769404    
        7.68740000     2376.089654314128         3.470384894312486    
        7.69120000     2364.443924050589         3.485489022811404    
        7.69500000     2355.713109594405         3.466623131018799    
        7.69880000     2350.872515471756         3.443648591517319    
        7.70260000     2345.610928969364         3.441197251397417    
        7.70640000     2344.152257159188         3.450190002934493    
        7.71020000     2336.408628019754         3.421247840284381    
        7.71400000     2338.277913445063         3.431307949164274    
        7.71780000     2338.504477043553         3.455590203560709    
        7.72160000     2347.763792879864         3.453822376696012    
        7.72540000     2348.794652179448         3.445151057477650    
        7.72920000     2345.365842479511         3.440494699428253    
        7.73300000     2343.485629959930         3.426709018493487    
        7.73680000     2348.576344101131         3.451632302822559    
        7.74060000     2346.592533798266         3.461249803119374    
        7.74440000     2352.887389586836         3.455115113689754    
        7.74820000     2359.210837315381         3.462826596336605    
        7.75200000     2364.305541103330         3.502624664129262    
        7.75580000     2384.887179715543         3.511625756440125    
        7.75960000     2400.205846067911         3.521206854425049    
        7.76340000     2418.071368641117         3.546013707633367    
        7.76720000     2450.304720934025         3.588037836451664    
        7.77100000     2489.060636638187         3.629225478120347    
        7.77480000     2534.161021442368         3.645771133124973    
        7.77860000     2583.126055142327         3.727191074544071    
        7.78240000     2636.759985717049         3.776896206387117    
        7.78620000     2684.397798109187         3.863914074179255    
        7.79000000     2736.047159156017         3.918818734524824    
        7.79380000     2779.474194901868         3.983717314537295    
        7.79760000     2814.537959002983         4.041294878129817    
        7.80140000     2837.256644736124         4.065209163482264    
        7.80520000     2849.600227680219         4.087995161549622    
        7.80900000     2844.489137399476         4.061972652803377    
        7.81280000     2824.359380896074         4.033748353856317    
        7.81660000     2791.948393608552         4.029701113011815    
        7.82040000     2757.964066448489         3.969737950772728    
        7.82420000     2710.397214636013         3.920890630932321    
        7.82800000     2673.618335977184         3.856701065175111    
        7.83180000     2625.740994772125         3.811494295324732    
        7.83560000     2582.135922335349         3.741918750226464    
        7.83940000     2538.398710279029         3.697031939266310    
        7.84320000     2499.489620344432         3.632656191584096    
        7.84700000     2464.745841129785         3.585564021357937    
        7.85080000     2436.606748365802         3.537209588178288    
        7.85460000     2411.155263857989         3.497054212920949    
        7.85840000     2390.617413930185         3.510189755854444    
        7.86220000     2377.630087630047         3.488910435373894    
        7.86600000     2361.830360175143         3.464835227259162    
        7.86980000     2347.971528977678         3.442496717730253    
        7.87360000     2340.919434053813         3.454238254616450    
        7.87740000     2332.594947534967         3.436355557387158    
        7.88120000     2330.021063370025         3.419807531222228    
        7.88500000     2325.945301917256         3.408124949377360    
        7.88880000     2325.470439177017         3.402334953072381    
        7.89260000     2317.329880833381         3.380233228733775    
        7.89640000     2315.813208827875         3.401564436187805    
        7.90020000     2312.081484666457         3.420251201112861    
        7.90400000     2309.336335327057         3.391162054233823    
        7.90780000     2304.330326874860         3.415998973528501    
        7.91160000     2303.040584039592         3.396076282978548    
        7.91540000     2300.435251046561         3.392039990301952    
        7.91920000     2298.469444692033         3.389413386384712    
        7.92300000     2296.525599263753         3.384946520326392    
        7.92680000     2294.065037080575         3.374427260022374    
        7.93060000     2292.204297607725         3.362099502258982    
        7.93440000     2293.876348876959         3.360385303908803    
        7.93820000     2298.936523672562         3.373142126206126    
        7.94200000     2300.628557838118         3.394193586707769    
        7.94580000     2295.950735219073         3.373286491941661    
        7.94960000     2293.229473594568         3.349560915337520    
        7.95340000     2293.773006955819         3.379779985438430    
        7.95720000     2293.641071107483         3.359927943831293    
        7.96100000     2295.925306708066         3.348389646504743    
        7.96480000     2293.832428202644         3.370971936449955    
        7.96860000     2290.762500541024         3.355320364996035    
        7.97240000     2293.476220091557         3.374161509223176    
        7.97620000     2294.372270824680         3.358800689368175    
        7.98000000     2292.896072819830         3.368278298117118    
        7.98380000     2295.435262247756         3.364467807296220    
        7.98760000     2293.963814120783         3.368524092353836    
        7.99140000     2292.175959887220         3.387863434380268    
        7.99520000     2293.830306740830         3.382039539266428    
        7.99900000     2293.358170416740         3.382186142480310    
        8.00280000     2291.767691445554         3.384896528171101    
        8.00660000     2292.146761979962         3.372983303093737    
        8.01040000     2289.096618115232         3.351772917950333    
        8.01420000     2288.369914877811         3.346030647054172    
        8.01800000     2288.051540689029         3.367123356824385    
        8.02180000     2290.261722025202         3.373116061567365    
        8.02560000     2291.111944929421         3.371842227902934    
        8.02940000     2286.979535952257         3.360980369528860    
        8.03320000     2288.352509135857         3.375942361287321    
        8.03700000     2288.802547215661         3.399551972080651    
        8.04080000     2289.481315392975         3.381445849233855    
        8.04460000     2289.272522715748         3.373207608992463    
        8.04840000     2287.227056108337         3.371452522318874    
        8.05220000     2286.894290282766         3.374390094955826    
        8.05600000     2287.674462387649         3.381280667359489    
        8.05980000     2290.558378997708         3.381695349754448    
        8.06360000     2290.007774983562         3.382770104740573    
        8.06740000     2284.397711118758         3.365909796511115    
        8.07120000     2287.020668644223         3.377316779200499    
        8.07500000     2286.899291703346         3.349749994583419    
        8.07880000     2288.003105369459         3.334212433750495    
        8.08260000     2294.525767724292         3.351791402478013    
        8.08640000     2292.021826822418         3.345326992133972    
        8.09020000     2293.665291840906         3.378838272695619    
        8.09400000     2293.095861310691         3.367685219689085    
        8.09780000     2293.835186790304         3.361502399894897    
        8.10160000     2297.334129782311         3.389745957781469    
        8.10540000     2304.333781648643         3.391747963915000    
        8.10920000     2307.928362651810         3.386800448726182    
        8.11300000     2310.575639164328         3.375686230114618    
        8.11680000     2311.901714229388         3.378439284080847    
        8.12060000     2322.250612407932         3.419806419133372    
        8.12440000     2327.718800664133         3.424363813341589    
        8.12820000     2339.062881313481         3.422661637656712    
        8.13200000     2352.868707972543         3.457162747985457    
        8.13580000     2366.487818352261         3.478682826349174    
        8.13960000     2382.909234989255         3.502161685083146    
        8.14340000     2408.554185644734         3.526218210043944    
        8.14720000     2432.816330503239         3.554094613699768    
        8.15100000     2473.266977050677         3.604018755388318    
        8.15480000     2520.058639031537         3.630654532736392    
        8.15860000     2566.240480598594         3.721535576939906    
        8.16240000     2624.188479283735         3.800864874461313    
        8.16620000     2685.037680979283         3.871928899787575    
        8.17000000     2745.945871353858         3.929374020376450    
        8.17380000     2815.638650456870         4.052001633056810    
        8.17760000     2878.713989687889         4.125784457754478    
        8.18140000     2939.241308383870         4.170993668741629    
        8.18520000     2995.588757937419         4.279633085272904    
        8.18900000     3049.610427003713         4.337964452155971    
        8.19280000     3086.939306606444         4.331972024551630    
        8.19660000     3120.380999760740         4.400947718682832    
        8.20040000     3137.169446418324         4.473720475059151    
        8.20420000     3152.938225963909         4.470508917875103    
        8.20800000     3146.838733826742         4.488260710662603    
        8.21180000     3133.596171936314         4.419365840690188    
        8.21560000     3100.985650253410         4.404181298170153    
        8.21940000     3061.259308033997         4.353167754379493    
        8.22320000     3012.958699084657         4.271308275154622    
        8.22700000     2956.002122849925         4.194395370628112    
        8.23080000     2894.367198019596         4.122700586831945    
        8.23460000     2834.315739335025         4.086212822793318    
        8.23840000     2775.854871482123         3.968299807109038    
        8.24220000     2708.201291381239         3.885852959827612    
        8.24600000     2649.493467691305         3.827393089080728    
        8.24980000     2596.533700605133         3.743371471212513    
        8.25360000     2548.597231814792         3.716066266456302    
        8.25740000     2502.684661872833         3.635002665880224    
        8.26120000     2472.299363390456         3.574637705229337    
        8.26500000     2446.954860134737         3.549563557065104    
        8.26880000     2418.417416426622         3.516773925713168    
        8.27260000     2406.381229705529         3.504191857864672    
        8.27640000     2386.145094156620         3.486822605487029    
        8.28020000     2371.347286415216         3.453116697098090    
        8.28400000     2361.000090274032         3.428900020065446    
        8.28780000     2353.376483258541         3.436069426086525    
        8.29160000     2344.571784342378         3.454040457869981    
        8.29540000     2340.890996256483         3.462390007969220    
        8.29920000     2341.135110912049         3.433890580461242    
        8.30300000     2341.361386396777         3.426152196848414    
        8.30680000     2335.689790715269         3.442365905795354    
        8.31060000     2338.764570273398         3.427730051457023    
        8.31440000     2345.191205146934         3.435938344776984    
        8.31820000     2348.575511628761         3.428740721236816    
        8.32200000     2356.277220135397         3.449841048706855    
        8.32580000     2369.222458464124         3.487576801573550    
        8.32960000     2372.527171494926         3.501112380664549    
        8.33340000     2380.195480754113         3.504160622812944    
        8.33720000     2394.598148496408         3.506785034254794    
        8.34100000     2400.332395556417         3.521377088893666    
        8.34480000     2414.134000298214         3.536186120265328    
        8.34860000     2425.998972540641         3.534615170470034    
        8.35240000     2432.690891858213         3.561722926824645    
        8.35620000     2438.211051873677         3.579509896630672    
        8.36000000     2437.934016162190         3.570966841903158    
        8.36380000     2438.326208799609         3.562783441247158    
        8.36760000     2436.920706196370         3.560679642168467    
        8.37140000     2433.736015976770         3.556856757885127    
        8.37520000     2436.173345702893         3.532931042814800    
        8.37900000     2434.935079961600         3.539316177402362    
        8.38280000     2437.898264866341         3.540490908865740    
        8.38660000     2442.322012126801         3.555513913443570    
        8.39040000     2444.368655473936         3.547368992785512    
        8.39420000     2449.331174299442         3.560288087911538    
        8.39800000     2458.765240046781         3.580168471286117    
        8.40180000     2470.496650647234         3.599033302820307    
        8.40560000     2483.243681900874         3.615791000555628    
        8.40940000     2492.454536748995         3.613288293165908    
        8.41320000     2501.949301623431         3.628421794935643    
        8.41700000     2504.632099980470         3.651982111513021    
        8.42080000     2512.438735194960         3.646879974456536    
        8.42460000     2513.920562765566         3.666995275767929    
        8.42840000     2516.874736498566         3.668788457537233    
        8.43220000     2515.081232102111         3.668240152640140    
        8.43600000     2513.631019959455         3.663728290049289    
        8.43980000     2508.537692121441         3.656554191330829    
        8.44360000     2502.848411291622         3.665115278444295    
        8.44740000     2496.351724107033         3.674047241639241    
        8.45120000     2488.940678899265         3.631532454747131    
        8.45500000     2480.232257077882         3.594378281075138    
        8.45880000     2473.287138484909         3.596085459513567    
        8.46260000     2464.135180162180         3.600781529369921    
        8.46640000     2457.649830317127         3.583681994491121    
        8.47020000     2452.022482152561         3.557445704413389    
        8.47400000     2441.752368644751         3.567734439248555    
        8.47780000     2430.386796911353         3.566647638218326    
        8.48160000     2422.053907662418         3.547477053953557    
        8.48540000     2415.583540882975         3.522070599682698    
        8.48920000     2406.831293690784         3.545453791985998    
        8.49300000     2400.845991858512         3.502296186872397    
        8.49680000     2394.545360864350         3.493122863813564    
        8.50060000     2387.407950046155         3.509279573809119    
        8.50440000     2378.005111308103         3.498756046950056    
        8.50820000     2375.339023064015         3.502168458620897    
        8.51200000     2367.367704607886         3.473967191716111    
        8.51580000     2359.524754463147         3.467220569009251    
        8.51960000     2356.195281834123         3.442121515892522    
        8.52340000     2348.011615943012         3.438564915053510    
        8.52720000     2339.043911732978         3.420606104914961    
        8.53100000     2336.274235253495         3.437339330016833    
        8.53480000     2331.267357276244         3.453874154400579    
        8.53860000     2330.931879835968         3.426261414875661    
        8.54240000     2322.965500476843         3.405540780369354    
        8.54620000     2321.174909848527         3.413155401493293    
        8.55000000     2324.471216822920         3.417245023905326    
        8.55380000     2326.157681652011         3.420011128126926    
        8.55760000     2329.576038290396         3.420312795137169    
        8.56140000     2331.672391711843         3.413043689975351    
        8.56520000     2339.236782988614         3.417780116946306    
        8.56900000     2346.627835295626         3.447813066502054    
        8.57280000     2358.088625821501         3.442426233222719    
        8.57660000     2363.554959254840         3.441501928841187    
        8.58040000     2371.331805954388         3.450530182816362    
        8.58420000     2380.025330196674         3.475393989737702    
        8.58800000     2392.713043822140         3.506988962255922    
        8.59180000     2404.592367575173         3.530489474547269    
        8.59560000     2416.812679259435         3.542274087644742    
        8.59940000     2429.609890213768         3.543349140828503    
        8.60320000     2440.377537968097         3.570304328143970    
        8.60700000     2445.343480147914         3.595303221189046    
        8.61080000     2460.681408154402         3.573745257331371    
        8.61460000     2470.082654082715         3.590591135182089    
        8.61840000     2478.431029282896         3.589429982041608    
        8.62220000     2483.868330536903         3.616932370076015    
        8.62600000     2482.679868537532         3.603039648696896    
        8.62980000     2481.820480813331         3.623907310435452    
        8.63360000     2478.440619406866         3.615045302714519    
        8.63740000     2474.298154163931         3.612515929643539    
        8.64120000     2465.294784474100         3.571913637573956    
        8.64500000     2453.499854768135         3.585028762398235    
        8.64880000     2449.988896287148         3.576866505115984    
        8.65260000     2440.710332021983         3.567226999045939    
        8.65640000     2432.537161232505         3.521472255433724    
        8.66020000     2425.334664131136         3.557398499956636    
        8.66400000     2420.195277250926         3.555402899314934    
        8.66780000     2419.491553227825         3.512836351797186    
        8.67160000     2418.907757196552         3.543675494900142    
        8.67540000     2428.565084704599         3.526848196405572    
        8.67920000     2436.336611676938         3.541450685746883    
        8.68300000     2444.605049836220         3.536748076426290    
        8.68680000     2459.507170632912         3.558289342008142    
        8.69060000     2477.942668356551         3.590167378818427    
        8.69440000     2500.930852131347         3.624664080956492    
        8.69820000     2532.073169500929         3.657047047474292    
        8.70200000     2564.728594031026         3.722147928448741    
        8.70580000     2602.560293397311         3.766324539672813    
        8.70960000     2646.751707981939         3.821235535793974    
        8.71340000     2685.393519760915         3.860920709946717    
        8.71720000     2724.780908661131         3.932245850435892    
        8.72100000     2773.195148345722         3.982187579291749    
        8.72480000     2817.935770958463         4.040473316489717    
        8.72860000     2869.760172246559         4.105265738712261    
        8.73240000     2920.841408563424         4.170302640538893    
        8.73620000     2976.632061766642         4.228252232768203    
        8.74000000     3036.598162590477         4.428241248182570    
        8.74380000     3108.258372355916         4.443904257398885    
        8.74760000     3178.831196826225         4.513782598848749    
        8.75140000     3257.349661362285         4.934589833951171    
        8.75520000     3333.666757697400         4.669597203315062    
        8.75900000     3400.455128656713         4.821410551142806    
        8.76280000     3461.307264905266         4.861725780379046    
        8.76660000     3500.634089311539         4.899789719374025    
        8.77040000     3521.446002248228         4.906041007475803    
        8.77420000     3524.188080368397         4.910965087631068    
        8.77800000     3501.385760605256         4.891524949333449    
        8.78180000     3465.223077946291         4.832973684995808    
        8.78560000     3410.513983929998         4.774586271178142    
        8.78940000     3349.742942444662         4.723866912089730    
        8.79320000     3270.586634394613         4.716148422097067    
        8.79700000     3187.561968122117         4.805421121029535    
        8.80080000     3104.638868496121         4.644275187736675    
        8.80460000     3025.537661618243         4.505940306266923    
        8.80840000     2949.329952920124         4.353958886019958    
        8.81220000     2878.568447994351         4.199853068140258    
        8.81600000     2819.573357838613         4.021205266920552    
        8.81980000     2760.342104929133         3.969280939333577    
        8.82360000     2717.100453355432         3.895026298778832    
        8.82740000     2679.619135528493         3.835674379340666    
        8.83120000     2647.385215323133         3.828006535056304    
        8.83500000     2626.497575207072         3.830380868164443    
        8.83880000     2613.605665143930         3.802339246352553    
        8.84260000     2600.413569970733         3.734225671915208    
        8.84640000     2591.873522089063         3.743322273129218    
        8.85020000     2591.332714394943         3.757920692617765    
        8.85400000     2595.497541019509         3.753803514444511    
        8.85780000     2600.225453951925         3.790573764273382    
        8.86160000     2595.168952158079         3.765598280651933    
        8.86540000     2601.784541954665         3.781784626960792    
        8.86920000     2606.189942463341         3.805813269600273    
        8.87300000     2607.503622628881         3.780947379364408    
        8.87680000     2599.840762401843         3.750274102689761    
        8.88060000     2585.973031097522         3.764032608307174    
        8.88440000     2582.482777420376         3.731716756399865    
        8.88820000     2567.769552460756         3.706561631292634    
        8.89200000     2552.435461803394         3.733140659053706    
        8.89580000     2530.043783146763         3.693431839361033    
        8.89960000     2511.543018934471         3.652397454352022    
        8.90340000     2493.219519733238         3.634364023792731    
        8.90720000     2471.629976167736         3.590333130740705    
        8.91100000     2448.574254189169         3.573540592509068    
        8.91480000     2436.158883491427         3.536742389729541    
        8.91860000     2421.173446131654         3.531451230645208    
        8.92240000     2405.460749103809         3.521146978908212    
        8.92620000     2392.695765974593         3.502072811957253    
        8.93000000     2383.615353324297         3.510706986061016    
        8.93380000     2370.034386813063         3.502343010967401    
        8.93760000     2360.835232851972         3.487585107333076    
        8.94140000     2356.715379838005         3.450573900235808    
        8.94520000     2347.997196301906         3.444037181852325    
        8.94900000     2343.527971741101         3.426895449316830    
        8.95280000     2343.164693921134         3.447344463768256    
        8.95660000     2340.055494955543         3.402778797644417    
        8.96040000     2332.939738320307         3.426061872374718    
        8.96420000     2333.618953679879         3.453981419051358    
        8.96800000     2331.935210646925         3.394447799637383    
        8.97180000     2331.195605902736         3.430103610646043    
        8.97560000     2334.561814956017         3.434383729861478    
        8.97940000     2339.376532517892         3.405135344989119    
        8.98320000     2340.289070590976         3.409229943447435    
        8.98700000     2342.617785172873         3.408095703132151    
        8.99080000     2345.184369323951         3.426974939510034    
        8.99460000     2353.890495953824         3.449865720989457    
        8.99840000     2357.549211233686         3.419945066215138    
        9.00220000     2363.951398337906         3.473649277441214    
        9.00600000     2368.375701711958         3.484831975353486    
        9.00980000     2381.418851590574         3.480668753820501    
        9.01360000     2387.465305593581         3.494832930343061    
        9.01740000     2395.450333668426         3.521620497707791    
        9.02120000     2407.084840585562         3.520874748568143    
        9.02500000     2416.513815135616         3.525715643758041    
        9.02880000     2427.445747247240         3.563365829347148    
        9.03260000     2434.076185992798         3.560879602879313    
        9.03640000     2445.528347907773         3.587145955265799    
        9.04020000     2457.040561565317         3.578617721778086    
        9.04400000     2464.514983122340         3.587717294179357    
        9.04780000     2472.438462766587         3.606011907582003    
        9.05160000     2481.914618466287         3.627762685208724    
        9.05540000     2490.594591969790         3.632871779085390    
        9.05920000     2494.087836304835         3.648178245130618    
        9.06300000     2498.124478183948         3.657341827309569    
        9.06680000     2502.322594507715         3.647267834102429    
        9.07060000     2503.299334489166         3.627241660326602    
        9.07440000     2501.790352917064         3.629571161013850    
        9.07820000     2498.023517312995         3.621923454415428    
        9.08200000     2489.983660004598         3.618591325009590    
        9.08580000     2484.413766937113         3.620918881160477    
        9.08960000     2478.144624133611         3.630761027732261    
        9.09340000     2469.186503095236         3.603575182979124    
        9.09720000     2462.129839469133         3.578271600716980    
        9.10100000     2458.424130640938         3.587425911849406    
        9.10480000     2450.430738205398         3.587318345401313    
        9.10860000     2441.101814160365         3.562212340516683    
        9.11240000     2433.900561186343         3.537289915931754    
        9.11620000     2424.829123017225         3.557678446418915    
        9.12000000     2424.208636046379         3.546046899511192    
        9.12380000     2421.285721340119         3.528194494754891    
        9.12760000     2420.120322544577         3.516553679377956    
        9.13140000     2418.863061995930         3.521690043476298    
        9.13520000     2419.668176812898         3.572170298931434    
        9.13900000     2424.632982821603         3.546579208393875    
        9.14280000     2424.439797559200         3.516740384603121    
        9.14660000     2427.115742272996         3.538716929537862    
        9.15040000     2430.575840552284         3.561143345951699    
        9.15420000     2433.400278447521         3.578520376809188    
        9.15800000     2433.945504506079         3.575342041905013    
        9.16180000     2437.428293973166         3.576194279379961    
        9.16560000     2443.438333286153         3.586900091370941    
        9.16940000     2441.990639019419         3.588801937817779    
        9.17320000     2445.304709353662         3.578625394057064    
        9.17700000     2443.970664156732         3.538640636395079    
        9.18080000     2445.353875196441         3.555969742903774    
        9.18460000     2449.776102142669         3.567793494455903    
        9.18840000     2453.856252967949         3.581955345706655    
        9.19220000     2453.904092652377         3.600530950428674    
        9.19600000     2458.076942360196         3.598078098675501    
        9.19980000     2464.408809686386         3.574313794461744    
        9.20360000     2467.828443966970         3.584664358079210    
        9.20740000     2474.216872782349         3.618921721176473    
        9.21120000     2483.752438888392         3.617020876743759    
        9.21500000     2497.196431926645         3.624693679909383    
        9.21880000     2513.653146344797         3.653800693956068    
        9.22260000     2526.046352002069         3.669678232397362    
        9.22640000     2544.045105394794         3.690915130402610    
        9.23020000     2562.585433857077         3.735119191790247    
        9.23400000     2587.223003247148         3.740327471034486    
        9.23780000     2614.851407821326         3.799117459664521    
        9.24160000     2629.214606039837         3.807854947355561    
        9.24540000     2659.256922529697         3.834740251533666    
        9.24920000     2685.628022168677         3.839129255181089    
        9.25300000     2716.598174012393         3.908686727127917    
        9.25680000     2744.447389851338         3.937079806590909    
        9.26060000     2777.185465780887         3.967657142827915    
        9.26440000     2813.013080053181         4.044859399313760    
        9.26820000     2839.217901925327         4.060426477000432    
        9.27200000     2874.482806254976         4.088884757831662    
        9.27580000     2911.860772154482         4.170695999187699    
        9.27960000     2948.183475827078         4.149035716465650    
        9.28340000     2990.382165086308         4.231901759563539    
        9.28720000     3028.247349035458         4.267199413426498    
        9.29100000     3078.956268356236         4.331382679063685    
        9.29480000     3129.328438173848         4.424295136765688    
        9.29860000     3189.121885628226         4.479894847693721    
        9.30240000     3252.972298969940         4.559605779181958    
        9.30620000     3313.242626038917         4.684130023791179    
        9.31000000     3388.121665863091         4.730772928482832    
        9.31380000     3460.945205678117         4.844226229318020    
        9.31760000     3526.040640145511         4.960932065370583    
        9.32140000     3592.844616752244         5.017705888383663    
        9.32520000     3647.793068557215         5.087596495892416    
        9.32900000     3694.099764671641         5.158116024567010    
        9.33280000     3735.792322089016         5.169895516006232    
        9.33660000     3776.095082185420         5.236071363133509    
        9.34040000     3819.584118869687         5.281707205906558    
        9.34420000     3850.764065416635         5.348624743565322    
        9.34800000     3906.897158393282         5.431967857791935    
        9.35180000     3965.900215487226         5.498402313777350    
        9.35560000     4040.116970171810         5.577288864611693    
        9.35940000     4128.859302235743         5.766996050005065    
        9.36320000     4226.051032902393         6.209912964745639    
        9.36700000     4338.050784238994         6.310207339271560    
        9.37080000     4451.338939390334         6.683586068619908    
        9.37460000     4569.989321695544         6.503029693128837    
        9.37840000     4675.678063822503         6.282913477865960    
        9.38220000     4757.725643385126         6.460680626386071    
        9.38600000     4824.693620294392         6.573404359087686    
        9.38980000     4869.762214420596         6.675713685534250    
        9.39360000     4882.068572146147         6.673809454344584    
        9.39740000     4853.420803477838         6.589808668382247    
        9.40120000     4795.154018588119         6.493383456791922    
        9.40500000     4696.520355589195         6.582974171185997    
        9.40880000     4581.373181458266         7.567370986772089    
        9.41260000     4429.538907709395         7.834128611671374    
        9.41640000     4265.352573114494         7.802086437696808    
        9.42020000     4099.362163836569         7.706084868565095    
        9.42400000     3928.233311359295         7.596053069848492    
        9.42780000     3760.890663311243         7.469236781607555    
        9.43160000     3596.209652485514         7.016815143391557    
        9.43540000     3448.816059191322         6.536888752008437    
        9.43920000     3314.652880862504         6.218697141348152    
        9.44300000     3189.188476792148         5.716277225210606    
        9.44680000     3081.973223109729         5.264679166806152    
        9.45060000     2986.412016029767         5.081831010852509    
        9.45440000     2902.763780461036         4.495935647410136    
        9.45820000     2833.590002963712         4.219028068790307    
        9.46200000     2771.120021989735         3.976145847780515    
        9.46580000     2719.672000533129         3.945942315591233    
        9.46960000     2674.728551719404         3.877299208798680    
        9.47340000     2631.073950567110         3.802711137715668    
        9.47720000     2595.126684430176         3.750553916739051    
        9.48100000     2565.183381351324         3.727512189500549    
        9.48480000     2529.669801205829         3.691531135467411    
        9.48860000     2504.839669681712         3.659754742844789    
        9.49240000     2482.861759074421         3.618290480655934    
        9.49620000     2457.895059855361         3.575300602478163    
        9.50000000     2442.358492856446         3.559186044450604    
        9.50380000     2424.608284705317         3.545651460492054    
        9.50760000     2410.025073014473         3.522427443979014    
        9.51140000     2399.349168709075         3.485346951280938    
        9.51520000     2382.536229937953         3.464242303804571    
        9.51900000     2376.264196301558         3.469800054019656    
        9.52280000     2368.033018435103         3.451257661372875    
        9.52660000     2360.144199263615         3.433593201392494    
        9.53040000     2357.220621152150         3.451711352405469    
        9.53420000     2354.307402894108         3.458849809833856    
        9.53800000     2346.136868031813         3.459935346236080    
        9.54180000     2340.155786368365         3.430591643001697    
        9.54560000     2332.373335257058         3.427657424741394    
        9.54940000     2333.105056044129         3.410687542378934    
        9.55320000     2328.382115806623         3.412034840117395    
        9.55700000     2327.020829842065         3.381375614556514    
        9.56080000     2323.194652584709         3.404367966237409    
        9.56460000     2321.098984653649         3.435294004979938    
        9.56840000     2317.741539133971         3.393763917816213    
        9.57220000     2314.987752196105         3.390681284918024    
        9.57600000     2311.831293327696         3.406235704633319    
        9.57980000     2312.705148569686         3.384518612133093    
        9.58360000     2310.321512315482         3.373727381756241    
        9.58740000     2312.475814647644         3.397339080262145    
        9.59120000     2315.784610362404         3.390111595310040    
        9.59500000     2319.401406872065         3.397669999599764    
        9.59880000     2330.436393387183         3.393542832663821    
        9.60260000     2337.093125656446         3.409568319634000    
        9.60640000     2344.918700419405         3.447871618400997    
        9.61020000     2354.200227816185         3.453080259177366    
        9.61400000     2368.057269020934         3.459910024470506    
        9.61780000     2383.184660932094         3.485570533068436    
        9.62160000     2395.761169232737         3.526744718608990    
        9.62540000     2414.023130938173         3.535268126250728    
        9.62920000     2423.166228709732         3.524808815654273    
        9.63300000     2426.126643336296         3.527702650998044    
        9.63680000     2424.878459572472         3.512639249159500    
        9.64060000     2431.524276786883         3.540571658990575    
        9.64440000     2424.513465951325         3.530667473985748    
        9.64820000     2412.871838243118         3.527436154504294    
        9.65200000     2399.717082410269         3.486960061162739    
        9.65580000     2388.401947156179         3.491308292144142    
        9.65960000     2383.838137132579         3.499434777027136    
        9.66340000     2369.794644437010         3.482673618856937    
        9.66720000     2360.619189472754         3.472772125231830    
        9.67100000     2349.338238545212         3.431545602368321    
        9.67480000     2346.188829666788         3.423115527476678    
        9.67860000     2339.265424253681         3.404647341753163    
        9.68240000     2334.388556591788         3.424756434904580    
        9.68620000     2327.201685943657         3.401440485162905    
        9.69000000     2322.850061459112         3.413045428958938    
        9.69380000     2318.459291473091         3.414861524486622    
        9.69760000     2305.305777100681         3.351399580398355    
        9.70140000     2303.619501152598         3.370682939453969    
        9.70520000     2299.447536132178         3.363845386316497    
        9.70900000     2294.751146101912         3.373077314454058    
        9.71280000     2290.389058923488         3.367431287042618    
        9.71660000     2287.501979190219         3.374860799025726    
        9.72040000     2282.778224434850         3.375344292754814    
        9.72420000     2284.556553182231         3.377713029170493    
        9.72800000     2282.456332806425         3.369980270479682    
        9.73180000     2280.005395827962         3.336273687697866    
        9.73560000     2282.884464600584         3.366597590695679    
        9.73940000     2284.513944658287         3.344804091337861    
        9.74320000     2285.325484539561         3.348943660217478    
        9.74700000     2286.002015103595         3.363770850901316    
        9.75080000     2287.956522220460         3.375939310186045    
        9.75460000     2290.633743306189         3.363363088437310    
        9.75840000     2292.127853714930         3.362207627247457    
        9.76220000     2301.036079180864         3.380770345003285    
        9.76600000     2311.029838428756         3.413827673903924    
        9.76980000     2319.715317472406         3.422557869216283    
        9.77360000     2326.777336889547         3.415087084526878    
        9.77740000     2335.609882217256         3.423696230128855    
        9.78120000     2345.867717282701         3.442743301759427    
        9.78500000     2361.560150941657         3.457350543837834    
        9.78880000     2375.114332061474         3.480599751054494    
        9.79260000     2393.366250108541         3.499929951145899    
        9.79640000     2408.928397106313         3.520956936739210    
        9.80020000     2425.597663223867         3.521533688714756    
        9.80400000     2445.916367373843         3.564959603222583    
        9.80780000     2465.619765673032         3.597520336444041    
        9.81160000     2484.449933140797         3.603538382832310    
        9.81540000     2501.511641675536         3.629164138270588    
        9.81920000     2514.816581136180         3.662426715764048    
        9.82300000     2523.217692266352         3.664575391461813    
        9.82680000     2533.981068882905         3.660524914012943    
        9.83060000     2542.117743466058         3.691146054592106    
        9.83440000     2543.001206670853         3.708568984283859    
        9.83820000     2535.852780347504         3.709409946433192    
        9.84200000     2527.308804314132         3.678709732865182    
        9.84580000     2522.091282878424         3.666574812554867    
        9.84960000     2514.572618754789         3.636277996121225    
        9.85340000     2502.972094533229         3.636218836052875    
        9.85720000     2498.049570846404         3.615016825643399    
        9.86100000     2488.010988214634         3.610601188496581    
        9.86480000     2479.854058447903         3.636637471411088    
        9.86860000     2475.288813515226         3.613017912983856    
        9.87240000     2469.100869365513         3.588786676922963    
        9.87620000     2472.222721986450         3.620373433931753    
        9.88000000     2473.939364811104         3.602743077693587    
        9.88380000     2477.020707563566         3.587851693670286    
        9.88760000     2483.288388476333         3.603145833654535    
        9.89140000     2493.876929868803         3.627750654547671    
        9.89520000     2511.311854133775         3.655350505861243    
        9.89900000     2525.580448987771         3.651765256722167    
        9.90280000     2545.172058732123         3.681693222533194    
        9.90660000     2569.606588036236         3.735255033779651    
        9.91040000     2593.970090648484         3.754058115334075    
        9.91420000     2624.538505703938         3.784844395094533    
        9.91800000     2661.294774721497         3.825421032976095    
        9.92180000     2693.115367916801         3.886887758500368    
        9.92560000     2737.826575764479         3.931160454624553    
        9.92940000     2784.727716191424         4.018063693990049    
        9.93320000     2834.297781481595         4.042541319413235    
        9.93700000     2878.037153118397         4.081873321766268    
        9.94080000     2935.998317590236         4.176075228086837    
        9.94460000     2995.652898726682         4.247090323042690    
        9.94840000     3060.646893846523         4.351406968629544    
        9.95220000     3121.842743984808         4.416643197853750    
        9.95600000     3189.379545450585         4.486155804139899    
        9.95980000     3260.744487124576         4.603236453780175    
        9.96360000     3322.989717965261         4.712005632820681    
        9.96740000     3381.534597721163         4.738619133603155    
        9.97120000     3434.866782797665         4.788852393985439    
        9.97500000     3488.238207434446         4.854467319852340    
        9.97880000     3521.290143192677         4.920589477156748    
        9.98260000     3539.583883726089         4.912280296698577    
        9.98640000     3544.714592908152         4.977330937161242    
        9.99020000     3526.719954385897         4.915688091858409    
        9.99400000     3498.734875812353         4.881936386695280    
        9.99780000     3456.405788024299         4.785867711642537    
       10.00160000     3397.305638786084         4.724784328099037    
       10.00540000     3327.270674972512         4.756913542887360    
       10.00920000     3248.708643064803         5.004947133614256    
       10.01300000     3164.150015606725         5.158311137698569    
       10.01680000     3075.447397634105         5.086129229159756    
       10.02060000     2993.712873163151         4.584702449693411    
       10.02440000     2920.790862015157         4.750546242948418    
       10.02820000     2852.165690377684         4.506902210871053    
       10.03200000     2791.866160624326         4.303950433421731    
       10.03580000     2736.626410966358         3.905069246962151    
       10.03960000     2690.960251995009         4.184793209937454    
       10.04340000     2643.253123287306         3.802353859357094    
       10.04720000     2613.661400625153         3.780489559385464    
       10.05100000     2584.356722709413         3.848385623975925    
       10.05480000     2562.995624420349         4.295329323745774    
       10.05860000     2546.814658283020         4.241149743638974    
       10.06240000     2537.175776361816         4.222976288485187    
       10.06620000     2533.114935869038         4.253028826324943    
       10.07000000     2536.243838959574         4.241057417441123    
       10.07380000     2536.819640473807         4.212749876712252    
       10.07760000     2544.819512728592         4.233345314625078    
       10.08140000     2558.966138537484         4.280795460493865    
       10.08520000     2569.599704434349         4.313985113812502    
       10.08900000     2583.135594886689         4.333551754793314    
       10.09280000     2603.124663192094         4.357608625209221    
       10.09660000     2619.917079584643         4.342319333916286    
       10.10040000     2638.939381777865         4.375648852329820    
       10.10420000     2661.096162910311         4.413415647263630    
       10.10800000     2687.530890685173         4.500566503263153    
       10.11180000     2709.746324269635         4.514922909847042    
       10.11560000     2736.304693069297         4.513489521042537    
       10.11940000     2756.747120317070         4.573176475246388    
       10.12320000     2772.266250838005         4.589363284413770    
       10.12700000     2792.896641238782         4.569668873723728    
       10.13080000     2816.642253016328         4.615093729031614    
       10.13460000     2835.423003501158         4.679878373961057    
       10.13840000     2852.437437386986         4.756346901926555    
       10.14220000     2873.519320677271         4.775921236012689    
       10.14600000     2890.872605772933         4.762932033510261    
       10.14980000     2910.442407256639         4.757762960668846    
       10.15360000     2928.478012035784         4.827651056363324    
       10.15740000     2957.175837538109         4.853307808899947    
       10.16120000     2983.333870504643         4.889027504638523    
       10.16500000     3004.746333230061         4.947190923322904    
       10.16880000     3031.763138178887         4.989625759125273    
       10.17260000     3060.756834048904         5.024614899649620    
       10.17640000     3088.591668218161         5.064459850783041    
       10.18020000     3110.012470781994         5.071385923742460    
       10.18400000     3125.604492552339         5.106697045289616    
       10.18780000     3140.780716304009         5.129339256956841    
       10.19160000     3144.537782522959         5.152147038406312    
       10.19540000     3135.424490055177         5.151152444197601    
       10.19920000     3120.498435427862         5.129804342414253    
       10.20300000     3100.306423075016         5.033951452426538    
       10.20680000     3078.284842999039         5.007634288787603    
       10.21060000     3049.901627623879         4.987603879652685    
       10.21440000     3021.082805770206         4.952912333125421    
       10.21820000     2990.357755122676         4.885508845011760    
       10.22200000     2972.980175542992         4.868602766319610    
       10.22580000     2957.587870232598         4.867522217011589    
       10.22960000     2938.831929912427         4.844865843990599    
       10.23340000     2922.241179412415         4.799165771240681    
       10.23720000     2898.574025327988         4.746550167978852    
       10.24100000     2887.973763562584         4.746927648112169    
       10.24480000     2869.506060990825         4.154545902758559    
       10.24860000     2859.837427506185         4.067074790562665    
       10.25240000     2838.684294988050         4.021310744439640    
       10.25620000     2816.362575392621         3.995738617781645    
       10.26000000     2789.217316442407         4.004895069141317    
       10.26380000     2757.672324795339         3.970390578390561    
       10.26760000     2725.990955787885         3.901276534225786    
       10.27140000     2692.498446946155         3.867149156114407    
       10.27520000     2658.574859764140         3.820566001571012    
       10.27900000     2626.112867552711         3.766192658385362    
       10.28280000     2599.982129903417         3.762205722078243    
       10.28660000     2573.656662208004         3.722115072739131    
       10.29040000     2554.555168091977         3.695057174568219    
       10.29420000     2530.366354366069         3.653219389502620    
       10.29800000     2520.673239973532         3.627544843730432    
       10.30180000     2502.772299955110         3.563791645575415    
       10.30560000     2493.740697938442         3.613100679039916    
       10.30940000     2483.058480318937         3.606494465067049    
       10.31320000     2479.162433527452         3.615631798212102    
       10.31700000     2467.825074066406         3.590902122123072    
       10.32080000     2459.867971679304         3.574533734359633    
       10.32460000     2445.230123965457         3.570800183047580    
       10.32840000     2445.675609200015         3.569183351593283    
       10.33220000     2430.851830206975         3.501475416243371    
       10.33600000     2419.475171428950         3.504638883930018    
       10.33980000     2404.243720821427         3.525325226943933    
       10.34360000     2392.071678271515         3.493981819393467    
       10.34740000     2373.642383511263         3.462664366330035    
       10.35120000     2358.765872869671         3.534849957311375    
       10.35500000     2341.791077352138         3.972340806317697    
       10.35880000     2331.999984371176         3.916646297004040    
       10.36260000     2321.792713672824         3.908573949641726    
       10.36640000     2310.898987877943         3.908619372618453    
       10.37020000     2304.648275652138         3.917648776804320    
       10.37400000     2297.086242950390         3.861558751533590    
       10.37780000     2291.488234324470         3.866655437643639    
       10.38160000     2286.087257551063         3.868074525190727    
       10.38540000     2276.817297263587         3.861949047175246    
       10.38920000     2271.019905345740         3.863368496264276    
       10.39300000     2265.242618641986         3.858226644821800    
       10.39680000     2264.162335857345         3.830248194904077    
       10.40060000     2261.373764168455         3.808615728943805    
       10.40440000     2263.176381653800         3.820743289384411    
       10.40820000     2264.766519200689         3.836725241537625    
       10.41200000     2262.463710012426         3.825258558380344    
       10.41580000     2260.985768970329         3.827095079327429    
       10.41960000     2260.731643575566         3.832206917787719    
       10.42340000     2259.455975726366         3.831292499240273    
       10.42720000     2255.915704688706         3.828996830939467    
       10.43100000     2255.951164527155         3.836560973202757    
       10.43480000     2260.567053193710         3.848071008482578    
       10.43860000     2261.078243518107         3.857069268865533    
       10.44240000     2258.775626519917         3.854391496234475    
       10.44620000     2256.080503384258         3.843616373365691    
       10.45000000     2255.030077110604         3.828348173578222    
       10.45380000     2255.518257427225         3.832130462616728    
       10.45760000     2260.887604200925         3.834079373342915    
       10.46140000     2264.235788884153         3.834109755092479    
       10.46520000     2265.301170111809         3.866792510601782    
       10.46900000     2266.547760584347         3.884338209686289    
       10.47280000     2265.384568296082         3.851873065647294    
       10.47660000     2269.172418373194         3.875717989969606    
       10.48040000     2270.179576376672         3.880470231008303    
       10.48420000     2276.103148389095         3.861691655154347    
       10.48800000     2277.012711036245         3.867120428340504    
       10.49180000     2283.434292166620         3.888145491055700    
       10.49560000     2286.808112676586         3.877032229616523    
       10.49940000     2294.226133850491         3.874739076814369    
       10.50320000     2300.484405057190         3.916927928153090    
       10.50700000     2305.486819607246         3.941783648594465    
       10.51080000     2315.837381194829         3.918593706551797    
       10.51460000     2329.760600775339         3.931222045509244    
       10.51840000     2344.112274782398         3.934865815031508    
       10.52220000     2354.769235804662         3.982644787838163    
       10.52600000     2374.406072075907         4.001953211752236    
       10.52980000     2394.837447586061         4.026172147852070    
       10.53360000     2417.490248244706         4.085276728065017    
       10.53740000     2445.855633290236         4.110904987686363    
       10.54120000     2465.963046058926         4.130068073790120    
       10.54500000     2490.543251408329         3.649547651273770    
       10.54880000     2523.651366002105         3.637157169160892    
       10.55260000     2564.034982617057         3.884224249215763    
       10.55640000     2599.723463757574         3.903887049262487    
       10.56020000     2647.896349174780         4.030231123496276    
       10.56400000     2689.242759186973         4.231482780667537    
       10.56780000     2736.630204928578         4.151956746737504    
       10.57160000     2780.035076468852         4.234813517728591    
       10.57540000     2836.704643755923         4.049961051687097    
       10.57920000     2875.045524562855         4.090343419460166    
       10.58300000     2923.995669263469         4.323067907920834    
       10.58680000     2977.670881475047         4.254321352417796    
       10.59060000     3038.831417534770         4.290869784302223    
       10.59440000     3085.653907466776         4.642299719741455    
       10.59820000     3154.434308471579         4.403752187882656    
       10.60200000     3221.476768029182         4.820235426207226    
       10.60580000     3300.747574452414         5.031554099458732    
       10.60960000     3373.746865560845         5.492103083351298    
       10.61340000     3472.630293331271         5.690870833955493    
       10.61720000     3569.889474736937         5.954301340693732    
       10.62100000     3675.844912576966         6.169755004533425    
       10.62480000     3783.264671321966         6.383570978129736    
       10.62860000     3903.564289270754         6.208390433071609    
       10.63240000     4008.310130988834         6.847055907359133    
       10.63620000     4125.071330509544         6.510639813931516    
       10.64000000     4212.111393393331         6.677070608171252    
       10.64380000     4299.282125862404         6.241630575828340    
       10.64760000     4350.488096395753         6.003917950898799    
       10.65140000     4392.958781320527         6.087217798139323    
       10.65520000     4407.891885516515         6.283418568092142    
       10.65900000     4406.895377766791         6.851149027049875    
       10.66280000     4382.712725266165         6.917539291298552    
       10.66660000     4343.785473194898         6.859325232999708    
       10.67040000     4292.290863952951         6.767453975084789    
       10.67420000     4232.128432311197         6.616453746796654    
       10.67800000     4162.937134443874         6.534386406580910    
       10.68180000     4078.647811976729         6.836574141103207    
       10.68560000     3987.177700532786         6.468137995479964    
       10.68940000     3902.269215088947         6.560327926375408    
       10.69320000     3814.639209399300         6.235188956576767    
       10.69700000     3728.809728605051         6.786223213669931    
       10.70080000     3638.432562391457         5.949855816998366    
       10.70460000     3563.127057072964         5.844760398988099    
       10.70840000     3494.738793135611         5.631694002220870    
       10.71220000     3430.025595771658         5.820679483448536    
       10.71600000     3366.214571823168         5.429250728506219    
       10.71980000     3311.846795946617         5.398150982094811    
       10.72360000     3263.563980518551         5.323074431916799    
       10.72740000     3219.274435019428         5.215393138416155    
       10.73120000     3186.752632972262         5.173572323873035    
       10.73500000     3163.493877783302         5.129658486549998    
       10.73880000     3136.765443254958         5.087376373363168    
       10.74260000     3121.162685172149         5.077048607647943    
       10.74640000     3105.379550773881         5.041646488087252    
       10.75020000     3089.304019969537         5.013093516892654    
       10.75400000     3073.715655457745         4.983163496448104    
       10.75780000     3059.940673723361         4.962588474958793    
       10.76160000     3042.249816937558         4.933318306613775    
       10.76540000     3020.525029254517         4.929195637529017    
       10.76920000     2998.924284323715         4.922100249559217    
       10.77300000     2968.927007498212         4.876507585619856    
       10.77680000     2940.011299819613         4.826784085916956    
       10.78060000     2914.122010895174         4.768433190141344    
       10.78440000     2884.948402793545         4.704961683654012    
       10.78820000     2851.955343602468         4.652286964974105    
       10.79200000     2820.790097562935         4.659222856217530    
       10.79580000     2789.024940450841         4.595770993191771    
       10.79960000     2763.888027942329         4.581302143596048    
       10.80340000     2732.330924646719         4.549914891680332    
       10.80720000     2704.173055493566         4.507494702516839    
       10.81100000     2674.584768580189         4.432494152666219    
       10.81480000     2650.125835922481         4.390891858298812    
       10.81860000     2623.521706083819         4.343700443517518    
       10.82240000     2595.990314466551         4.334941914588146    
       10.82620000     2577.646537303885         4.287369125673989    
       10.83000000     2561.337295140053         4.285610263230080    
       10.83380000     2540.546937898861         4.277153641291382    
       10.83760000     2529.891233984448         4.241473628335846    
       10.84140000     2515.024481134471         4.202765930803099    
       10.84520000     2503.915464331834         4.048872520501929    
       10.84900000     2496.229386740804         3.697148894987725    
       10.85280000     2490.784715198807         3.592847941111425    
       10.85660000     2483.247869206416         3.562269850322179    
       10.86040000     2488.634983067507         3.567269446106458    
       10.86420000     2487.586735695688         3.605108361837818    
       10.86800000     2489.609562599293         3.612629837539740    
       10.87180000     2493.188999039427         3.612366197911717    
       10.87560000     2495.883290411857         3.625528675804835    
       10.87940000     2504.289729770664         3.599549409169816    
       10.88320000     2514.610855218848         3.640591729969188    
       10.88700000     2518.883064729604         3.673594415366896    
       10.89080000     2527.525922139185         3.658127869870015    
       10.89460000     2529.443030191941         3.656219469437117    
       10.89840000     2534.051271606854         3.642992038273280    
       10.90220000     2544.975221369356         3.667652032549706    
       10.90600000     2543.711434333220         3.672335535161035    
       10.90980000     2545.169044760134         3.656230965117871    
       10.91360000     2554.699919352003         3.674028394587981    
       10.91740000     2550.683614179276         3.686276155996012    
       10.92120000     2550.111271083604         3.670902103428996    
       10.92500000     2540.140656973311         3.664374341399108    
       10.92880000     2537.903749141787         3.684331508610390    
       10.93260000     2534.803926998144         3.663954745019126    
       10.93640000     2532.218397006479         3.616062398490189    
       10.94020000     2532.898132361054         3.666686526549984    
       10.94400000     2525.105939184958         3.651100324102766    
       10.94780000     2524.963990235707         3.644058118125189    
       10.95160000     2520.441294789199         3.724895759462546    
       10.95540000     2523.012893823146         4.071919847514108    
       10.95920000     2525.382103692541         4.183826760298511    
       10.96300000     2531.077922931941         4.236553020038754    
       10.96680000     2543.205557977979         4.242658421182816    
       10.97060000     2553.424396981437         4.233900340661843    
       10.97440000     2575.548455919787         4.298550832258419    
       10.97820000     2583.948231439625         4.261576068189945    
       10.98200000     2599.555698357218         4.295172997324801    
       10.98580000     2611.183662574266         4.300559853137695    
       10.98960000     2632.006119617352         4.368074340657712    
       10.99340000     2644.348646688626         4.401911702816817    
       10.99720000     2655.286892966053         4.426537645455645    
       11.00100000     2670.040985742944         4.429118325922411    
       11.00480000     2681.069303968979         4.438470230902545    
       11.00860000     2686.641901014714         4.411787805445521    
       11.01240000     2698.494606702778         4.440038462267979    
       11.01620000     2693.772074688842         4.431727230365436    
       11.02000000     2696.067704903095         4.445572543104674    
       11.02380000     2701.446006988996         4.467201986414639    
       11.02760000     2698.100869929434         4.457783736226378    
       11.03140000     2686.820274666806         4.449222756690410    
       11.03520000     2676.668743480528         4.421001457351624    
       11.03900000     2666.911204749110         4.394158074630276    
       11.04280000     2658.519219655512         4.375510325769913    
       11.04660000     2645.528303709562         4.364757648456296    
       11.05040000     2629.939689090052         4.371102834594322    
       11.05420000     2611.025615586922         4.321338383417608    
       11.05800000     2591.104549561516         4.271525549303924    
       11.06180000     2572.655441884620         4.245227098185175    
       11.06560000     2553.213173555564         4.217291251806456    
       11.06940000     2532.305954189891         4.193262311052678    
       11.07320000     2510.772196494965         4.203705289485709    
       11.07700000     2490.627237581312         4.158913457913933    
       11.08080000     2473.134624913414         4.124310907852536    
       11.08460000     2453.930177050168         4.104151469533488    
       11.08840000     2438.432892373175         4.073892877926459    
       11.09220000     2426.690208894353         4.081241752055422    
       11.09600000     2412.062674985656         4.044866568381128    
       11.09980000     2402.906756753823         4.012099445357569    
       11.10360000     2393.168608716991         4.008680908845755    
       11.10740000     2386.596593051614         4.025221207651186    
       11.11120000     2384.335007164883         4.039799629988313    
       11.11500000     2383.366130620501         4.013019648656331    
       11.11880000     2380.236017805290         3.997491173459396    
       11.12260000     2378.301483520289         4.011175341433144    
       11.12640000     2376.848359983532         3.997285544154981    
       11.13020000     2375.964199501242         3.990923628211269    
       11.13400000     2375.535012980940         4.000534423485497    
       11.13780000     2377.434284651342         4.012514065451906    
       11.14160000     2378.152280459073         3.995455935794613    
       11.14540000     2379.756723423184         3.600074420231900    
       11.14920000     2378.377797034264         3.459112109386651    
       11.15300000     2387.205980421946         3.455160087854020    
       11.15680000     2389.957393733866         3.456513251596707    
       11.16060000     2388.852965335946         3.444737782646393    
       11.16440000     2390.235074982151         3.458201691578951    
       11.16820000     2396.828995553586         3.500259630990540    
       11.17200000     2397.729662752100         3.504222040258954    
       11.17580000     2398.675453902201         3.517981065954859    
       11.17960000     2404.235412968538         3.485346810364356    
       11.18340000     2405.296190135654         3.495320467150668    
       11.18720000     2403.627603093371         3.487874545351995    
       11.19100000     2406.682290825418         3.525636952555873    
       11.19480000     2401.865633239940         3.500950488981361    
       11.19860000     2398.291437205152         3.468511197009714    
       11.20240000     2394.186874593677         3.470808017350348    
       11.20620000     2388.302732541105         3.459269202511831    
       11.21000000     2378.099445653193         3.438059195232113    
       11.21380000     2379.478020329349         3.465758632059305    
       11.21760000     2372.176693591086         3.437257734434299    
       11.22140000     2366.041423358731         3.410715596988922    
       11.22520000     2365.034231104567         3.444465694661713    
       11.22900000     2357.404565047931         3.436963580432675    
       11.23280000     2350.717871358912         3.437589353944556    
       11.23660000     2345.788498210121         3.391811461915378    
       11.24040000     2340.114030340664         3.413797458323392    
       11.24420000     2335.613850980723         3.385897927575027    
       11.24800000     2328.138708948947         3.394415894724657    
       11.25180000     2320.515846642376         3.385730670355724    
       11.25560000     2311.883972609654         3.382561752893921    
       11.25940000     2310.886880797193         3.352901729020793    
       11.26320000     2304.737558779828         3.352534132367676    
       11.26700000     2300.063946494440         3.345995566057464    
       11.27080000     2299.800641410676         3.358103821151038    
       11.27460000     2299.799779555632         3.363353864424877    
       11.27840000     2288.849849627145         3.341188268864832    
       11.28220000     2282.341866368229         3.335095896299244    
       11.28600000     2276.730015857238         3.313721996617722    
       11.28980000     2272.252795738263         3.327020718738618    
       11.29360000     2267.412984361565         3.330363592538401    
       11.29740000     2263.309085883478         3.329058224067049    
       11.30120000     2258.014324761579         3.313030277856832    
       11.30500000     2256.365145553068         3.301189871391950    
       11.30880000     2251.031537171573         3.288433083361069    
       11.31260000     2248.564564947810         3.287029049193491    
       11.31640000     2246.145389930771         3.281143436411416    
       11.32020000     2249.952106419829         3.286851576695424    
       11.32400000     2253.101735253982         3.309819037644522    
       11.32780000     2260.048031428479         3.318982168364716    
       11.33160000     2264.734182315369         3.308428860101354    
       11.33540000     2273.966277395976         3.319786536949417    
       11.33920000     2284.767935351948         3.331478058728487    
       11.34300000     2295.337010901058         3.358030048822776    
       11.34680000     2311.690270797608         3.365275520452969    
       11.35060000     2331.314150911187         3.406777056528597    
       11.35440000     2350.037347396587         3.432147882423005    
       11.35820000     2369.728151810044         3.425818481160595    
       11.36200000     2392.519811954341         3.452171263483772    
       11.36580000     2419.344335094358         3.504079567865836    
       11.36960000     2440.785260104058         3.537177451085706    
       11.37340000     2466.856154915487         3.577445814601529    
       11.37720000     2487.893206317429         3.609680333991638    
       11.38100000     2512.985035384779         3.628248457746666    
       11.38480000     2541.867853975866         3.653355711227755    
       11.38860000     2567.757763241052         3.692269403547127    
       11.39240000     2589.637323686513         3.733738667937868    
       11.39620000     2606.870081820352         3.745394814010776    
       11.40000000     2627.921303683698         3.761097561720049    
       11.40380000     2646.370298273229         3.797557084973887    
       11.40760000     2664.108294953680         3.830810800765789    
       11.41140000     2677.582516879025         3.836995784314079    
       11.41520000     2686.857687369709         3.851687887656015    
       11.41900000     2691.055427530238         3.854022217594794    
       11.42280000     2693.403827611518         3.874000310665120    
       11.42660000     2687.743819876604         3.849557125520535    
       11.43040000     2682.456883467879         3.829158971164612    
       11.43420000     2675.813769350500         3.849821107473258    
       11.43800000     2667.664710016583         3.836121339917098    
       11.44180000     2658.731073053758         3.805406170502117    
       11.44560000     2653.427229344061         3.817533888301623    
       11.44940000     2644.880274510070         3.808496478197128    
       11.45320000     2638.604783356954         3.796250556789099    
       11.45700000     2636.657689722290         3.785932088586683    
       11.46080000     2636.103550144410         3.753723413037975    
       11.46460000     2635.611948026181         3.769701266179859    
       11.46840000     2637.183899309343         3.791101148334380    
       11.47220000     2639.006117953579         3.804080196164288    
       11.47600000     2648.279083709810         3.830049341161906    
       11.47980000     2647.505929219998         3.803023807191126    
       11.48360000     2651.767441302609         3.796476583155042    
       11.48740000     2660.650944355700         3.834621578194997    
       11.49120000     2667.695881739976         3.848398846288080    
       11.49500000     2672.154461577208         3.851586540486399    
       11.49880000     2680.910569444673         3.836050456464560    
       11.50260000     2688.012065777699         3.842894330858281    
       11.50640000     2697.301324938452         3.860455989745852    
       11.51020000     2701.794560682272         3.881838372318943    
       11.51400000     2709.197449354580         3.862801783754295    
       11.51780000     2716.242375667285         3.874024118652359    
       11.52160000     2727.881577713912         3.861487233583877    
       11.52540000     2733.580477914651         3.918054198186851    
       11.52920000     2742.735861898471         3.907956718145621    
       11.53300000     2748.527655639237         3.945752653848648    
       11.53680000     2756.895041304184         3.905308625270723    
       11.54060000     2758.759118730030         3.946857510892493    
       11.54440000     2768.107733128063         3.931196417447817    
       11.54820000     2768.178234833518         3.963745594276332    
       11.55200000     2770.039485392160         3.933374856295007    
       11.55580000     2769.683441311251         3.937749230948048    
       11.55960000     2770.222589655516         3.920240907478711    
       11.56340000     2758.177182365586         3.918273184333283    
       11.56720000     2753.445634969744         3.895227484863656    
       11.57100000     2737.801649960965         3.897530606057372    
       11.57480000     2724.771785500086         3.891610926855773    
       11.57860000     2704.436150357889         3.892165260091054    
       11.58240000     2684.243721266941         3.858998761420894    
       11.58620000     2655.864211388704         3.796911078694481    
       11.59000000     2635.469178829797         3.794335846926231    
       11.59380000     2611.038440714889         3.760948362921454    
       11.59760000     2579.470268565541         3.728187026485446    
       11.60140000     2555.088974034217         3.698037854285031    
       11.60520000     2529.488090414941         3.647824437088301    
       11.60900000     2507.599769102079         3.636743050373640    
       11.61280000     2485.827733074780         3.589447349889895    
       11.61660000     2465.985524490482         3.561632324139638    
       11.62040000     2444.772667100746         3.553996853913559    
       11.62420000     2425.123486598936         3.531399432001506    
       11.62800000     2413.670676449698         3.500942797815420    
       11.63180000     2397.020673375976         3.491306326472104    
       11.63560000     2382.052877853358         3.467121214517567    
       11.63940000     2365.482088244765         3.428134258426514    
       11.64320000     2349.641689663906         3.435672028760051    
       11.64700000     2337.072199652717         3.395539816292255    
       11.65080000     2326.437075455264         3.394220768921516    
       11.65460000     2302.623778446952         3.350758852760519    
       11.65840000     2289.720802381987         3.334370840077995    
       11.66220000     2272.375573749669         3.314172353588869    
       11.66600000     2256.761326853764         3.300912738414442    
       11.66980000     2236.811301636121         3.278133508450688    
       11.67360000     2219.253937980118         3.254434982331853    
       11.67740000     2199.438647943754         3.242814386186737    
       11.68120000     2182.921344480630         3.209625015079601    
       11.68500000     2171.667221927705         3.196425727383553    
       11.68880000     2155.932469416703         3.190406622227957    
       11.69260000     2140.809604402633         3.170416932227616    
       11.69640000     2129.760567626983         3.160186831320722    
       11.70020000     2118.421922894247         3.139650492497120    
       11.70400000     2106.219687734890         3.120592601336600    
       11.70780000     2097.950196025028         3.103829345819656    
       11.71160000     2087.747835852663         3.086150410618759    
       11.71540000     2079.417178014540         3.090108399463797    
       11.71920000     2074.270827084491         3.092205127254664    
       11.72300000     2068.402110853414         3.082185758002599    
       11.72680000     2060.989382101236         3.056578775702230    
       11.73060000     2056.352328629720         3.053293210177262    
       11.73440000     2050.432088179271         3.036699332670583    
       11.73820000     2046.554720824236         3.038579929441756    
       11.74200000     2045.149682593586         3.040993865727533    
       11.74580000     2043.880764499418         3.057947713145947    
       11.74960000     2037.926604184473         3.052547773148064    
       11.75340000     2034.684596829731         3.040001414119126    
       11.75720000     2029.821355365011         3.007930037112645    
       11.76100000     2028.410629507555         3.011254549791653    
       11.76480000     2028.170192379276         3.014137855702297    
       11.76860000     2026.266399436702         3.020338878683522    
       11.77240000     2020.811714839079         3.028145509656719    
       11.77620000     2023.558258508663         3.045753170135475    
       11.78000000     2023.452844578312         3.028059632846845    
       11.78380000     2022.755900632416         3.029024181306167    
       11.78760000     2023.180340894657         3.026607913685234    
       11.79140000     2019.179010750248         3.019284847120266    
       11.79520000     2022.099767616358         3.025201432939947    
       11.79900000     2022.973827405422         3.016239675793686    
       11.80280000     2021.286467149110         3.007805313027491    
       11.80660000     2021.408228214196         3.026548469725166    
       11.81040000     2019.925197018826         3.000959433741153    
       11.81420000     2019.986139828702         3.008710034446764    
       11.81800000     2020.051433492325         3.020722973748679    
       11.82180000     2020.243652316638         2.998088065985740    
       11.82560000     2022.739543163317         3.002762668476886    
       11.82940000     2027.202316810272         3.016594392594944    
       11.83320000     2026.238667454041         3.012835520206076    
       11.83700000     2024.594791750154         3.000580882049418    
       11.84080000     2025.840499387541         3.009989122291416    
       11.84460000     2023.986214791889         3.012977712857436    
       11.84840000     2021.050033544728         3.002655177844467    
       11.85220000     2024.193029564722         2.990223592764057    
       11.85600000     2021.515013168998         3.007172018005893    
       11.85980000     2015.602651252342         3.003133323543488    
       11.86360000     2012.043468185040         3.002250451117466    
       11.86740000     2011.697975522176         2.971361384830805    
       11.87120000     2007.212092560221         2.961268481009111    
       11.87500000     2008.198219756412         3.002683363098047    
       11.87880000     2005.153552638559         3.009684537426832    
       11.88260000     2001.898511464418         3.008764862739172    
       11.88640000     1998.777524061363         2.964931735987153    
       11.89020000     1997.086192054928         2.976807395180563    
       11.89400000     1996.245087285038         2.991494591643550    
       11.89780000     1994.065389490728         2.973122218343514    
       11.90160000     1994.397286611704         2.995098634658093    
       11.90540000     1992.515596387227         2.978896603854127    
       11.90920000     1993.635080029690         2.986117970808781    
       11.91300000     1995.217744851846         2.972392886768507    
       11.91680000     1992.632262778285         2.964428770189915    
       11.92060000     1989.120727430053         2.968583461805682    
       11.92440000     1991.555080316467         2.988328086535970    
       11.92820000     1998.913120391262         2.985021600335108    
       11.93200000     1997.183893485308         2.986712260167483    
       11.93580000     2000.387124822774         2.992287736320089    
       11.93960000     2005.289428910529         2.995645549026976    
       11.94340000     2011.409767036613         2.995739696792536    
       11.94720000     2017.142899239136         2.991517193020677    
       11.95100000     2022.309900720894         3.009537635409523    
       11.95480000     2025.484423260793         3.025341671282336    
       11.95860000     2027.395114935061         3.018568439977247    
       11.96240000     2027.798942921972         3.011404148474818    
       11.96620000     2031.122826031047         3.033879304066378    
       11.97000000     2030.587253573819         3.029960358553685    
       11.97380000     2024.688373175349         3.017568281531156    
       11.97760000     2023.633985575174         3.025929967532340    
       11.98140000     2022.445107134348         3.036944053538588    
       11.98520000     2023.075858106112         3.028794312764217    
       11.98900000     2024.119236221215         3.029862111743079    
       11.99280000     2021.136362445712         3.029363582391635    
       11.99660000     2026.507481039541         3.020635969347272    
       12.00040000     2024.951786053884         3.017488512480160    
       12.00420000     2031.166618927158         3.030710138926100    
       12.00800000     2032.667794126070         3.024672915900518    
       12.01180000     2037.842431983013         3.025805467024778    
       12.01560000     2041.952303976461         3.041378569466943    
       12.01940000     2046.638605857433         3.058050629020739    
       12.02320000     2051.921266305316         3.056696142912363    
       12.02700000     2058.254190956762         3.055466106937776    
       12.03080000     2064.512463099000         3.050552802959867    
       12.03460000     2069.342472206441         3.067871736399400    
       12.03840000     2075.379460953552         3.085222525471635    
       12.04220000     2081.215506380463         3.099683307117727    
       12.04600000     2089.500232738529         3.110826542515427    
       12.04980000     2093.807216548480         3.116861770571611    
       12.05360000     2097.346523843768         3.116712581150706    
       12.05740000     2104.422389240395         3.115795466771317    
       12.06120000     2111.359953279591         3.136270703894884    
       12.06500000     2117.147986227980         3.138572396013114    
       12.06880000     2120.056953728566         3.150274923528756    
       12.07260000     2123.119280769368         3.152126579844190    
       12.07640000     2126.232084441186         3.174263851996111    
       12.08020000     2129.388324915687         3.176801469355707    
       12.08400000     2129.785550177915         3.148097522592726    
       12.08780000     2132.167465936256         3.150502863039204    
       12.09160000     2131.979458502994         3.157672921514530    
       12.09540000     2129.859379136478         3.155439560137755    
       12.09920000     2128.870233811334         3.155962822260420    
       12.10300000     2123.141550809798         3.152989999089766    
       12.10680000     2123.568492101634         3.135333415229534    
       12.11060000     2120.517439470135         3.136085149426463    
       12.11440000     2119.467265707806         3.132849906697715    
       12.11820000     2115.730628322234         3.127081365191990    
       12.12200000     2115.652077301337         3.119012310241410    
       12.12580000     2117.149274679392         3.145792251444730    
       12.12960000     2118.652606587566         3.121213846858570    
       12.13340000     2113.877957448129         3.113878943524426    
       12.13720000     2114.662930637217         3.101191043699330    
       12.14100000     2109.689997975399         3.126265187091183    
       12.14480000     2113.198035919752         3.135019333597537    
       12.14860000     2109.469984435872         3.119774318059573    
       12.15240000     2109.039338398663         3.109222042729000    
       12.15620000     2106.277125590502         3.110428988774249    
       12.16000000     2105.640737431491         3.116077910482220    
       12.16380000     2102.658466698450         3.118116755375607    
       12.16760000     2100.063953770117         3.079412074475640    
       12.17140000     2100.168693065194         3.086030816954059    
       12.17520000     2103.907060730473         3.104909674621070    
       12.17900000     2098.834944863744         3.120449180915980    
       12.18280000     2104.672184785620         3.135073760607330    
       12.18660000     2103.836013122304         3.110392724879134    
       12.19040000     2109.555919604754         3.111779212564768    
       12.19420000     2112.257506006638         3.131255008631091    
       12.19800000     2117.631949058842         3.138428340427733    
       12.20180000     2123.871004779084         3.159988182890527    
       12.20560000     2137.394287721193         3.172551160941351    
       12.20940000     2152.274989727612         3.191743859649036    
       12.21320000     2169.024946236457         3.203046626880601    
       12.21700000     2186.696771951905         3.212707044009930    
       12.22080000     2208.237066128338         3.239844132203424    
       12.22460000     2232.837712838751         3.283446526977424    
       12.22840000     2263.384816129943         3.333546430147424    
       12.23220000     2292.701893208051         3.342888998942807    
       12.23600000     2329.527762518152         3.410438068276313    
       12.23980000     2368.804197623825         3.462315229008038    
       12.24360000     2414.643374172106         3.517512699155374    
       12.24740000     2455.747406036149         3.552904307285057    
       12.25120000     2501.313567389264         3.602872992751052    
       12.25500000     2546.993172914946         3.688817697429247    
       12.25880000     2586.760745337212         3.717160303496544    
       12.26260000     2628.305140403779         3.775526469542560    
       12.26640000     2663.010582797489         3.844828992391468    
       12.27020000     2696.081952917580         3.863728343946678    
       12.27400000     2720.304461322692         3.906745181125973    
       12.27780000     2726.491113818943         3.896592782947104    
       12.28160000     2738.059453474312         3.939116874219249    
       12.28540000     2741.884821098385         3.962919774436523    
       12.28920000     2735.731591004019         3.922859476608143    
       12.29300000     2721.906251459090         3.906343537192663    
       12.29680000     2700.730499480650         3.848487428920533    
       12.30060000     2674.976841129358         3.836545821627649    
       12.30440000     2653.182593675483         3.798369425648713    
       12.30820000     2616.725559305587         3.765258106089264    
       12.31200000     2591.299803628082         3.704151570319434    
       12.31580000     2555.260716856068         3.688146774567362    
       12.31960000     2522.550455529470         3.671129896766476    
       12.32340000     2492.538293664468         3.598868059902510    
       12.32720000     2463.468086595273         3.583229055757459    
       12.33100000     2430.248323090868         3.520994219371154    
       12.33480000     2398.029689675658         3.484230940426653    
       12.33860000     2372.137422220176         3.457401020782174    
       12.34240000     2349.506965457328         3.445591495443991    
       12.34620000     2324.832324228130         3.416032416581172    
       12.35000000     2303.835094551578         3.402280351459769    
       12.35380000     2282.812140292262         3.357760754584545    
       12.35760000     2265.596208266143         3.326444601170328    
       12.36140000     2249.768803741950         3.302598692713070    
       12.36520000     2240.289199244755         3.301905717366250    
       12.36900000     2230.060448096616         3.300169291509927    
       12.37280000     2222.048162041064         3.273634725202595    
       12.37660000     2217.908192052845         3.273607242728648    
       12.38040000     2215.165863374089         3.272471651449387    
       12.38420000     2211.679282553818         3.273540878090499    
       12.38800000     2212.013097223085         3.271063412713719    
       12.39180000     2217.178899271683         3.263903999881527    
       12.39560000     2223.246505611669         3.279194495644892    
       12.39940000     2232.502306303993         3.288731444396230    
       12.40320000     2240.093243828928         3.301006650099584    
       12.40700000     2254.974445134776         3.337988929357237    
       12.41080000     2271.339217727976         3.345770914042862    
       12.41460000     2290.288133053321         3.347195202879606    
       12.41840000     2308.945420471167         3.372596479500952    
       12.42220000     2328.916721103133         3.411029189296419    
       12.42600000     2356.066403609898         3.439613126460983    
       12.42980000     2386.980278812745         3.477771352283756    
       12.43360000     2410.294791356293         3.510784664359394    
       12.43740000     2431.233011128812         3.521067147313113    
       12.44120000     2457.485713310766         3.575224230137962    
       12.44500000     2487.037977721417         3.612632933037341    
       12.44880000     2517.589972929056         3.650646787340298    
       12.45260000     2547.564731295393         3.674814739260816    
       12.45640000     2572.743798848368         3.697792134766097    
       12.46020000     2595.137007166085         3.731628701016308    
       12.46400000     2614.731075057523         3.779898400651772    
       12.46780000     2638.213148730085         3.786273238923596    
       12.47160000     2660.604074004161         3.803232339710869    
       12.47540000     2666.328619584152         3.810280622274651    
       12.47920000     2678.510336576097         3.840272211886833    
       12.48300000     2684.923228112370         3.870020298902973    
       12.48680000     2685.298694158705         3.840365769821616    
       12.49060000     2676.705886965419         3.843638582289620    
       12.49440000     2666.780695709360         3.833447974051831    
       12.49820000     2654.920944504910         3.821632399689352    
       12.50200000     2636.245712596234         3.809350189220682    
       12.50580000     2614.364112991066         3.769362892753545    
       12.50960000     2589.969563164741         3.751074778967432    
       12.51340000     2567.678528262032         3.715045653454533    
       12.51720000     2541.466242593912         3.647348189818218    
       12.52100000     2513.160648135461         3.643608962681434    
       12.52480000     2480.937692110936         3.590830598291005    
       12.52860000     2458.265998752574         3.564303347638516    
       12.53240000     2428.373995819664         3.541783016594021    
       12.53620000     2405.084785979022         3.512311355583540    
       12.54000000     2372.338851047220         3.468928308981996    
       12.54380000     2349.327712261076         3.444022415086654    
       12.54760000     2321.810396822749         3.380626342886185    
       12.55140000     2293.123615670779         3.351116180594881    
       12.55520000     2267.664243081742         3.313412010791121    
       12.55900000     2243.846572445420         3.291208853740455    
       12.56280000     2217.211893146599         3.262348008385180    
       12.56660000     2196.592516887649         3.247919279221303    
       12.57040000     2174.317237549277         3.221266862492181    
       12.57420000     2151.800021482490         3.199292524622728    
       12.57800000     2133.874142400280         3.176438641552948    
       12.58180000     2117.625874561280         3.167867257476515    
       12.58560000     2102.413388945813         3.154642717805537    
       12.58940000     2092.141272625300         3.115647999445577    
       12.59320000     2074.659179010654         3.074258900942669    
       12.59700000     2061.576666922027         3.069091843199004    
       12.60080000     2053.439639088602         3.078465308778908    
       12.60460000     2043.521727036196         3.030058934082833    
       12.60840000     2040.080081299902         3.046618526605660    
       12.61220000     2030.061795785849         3.014627942923271    
       12.61600000     2025.908178870862         3.034953924718859    
       12.61980000     2021.225392213868         3.037888325848039    
       12.62360000     2020.701827008539         3.023874095076677    
       12.62740000     2025.985034158210         3.032017621016700    
       12.63120000     2024.123063365196         3.020811823768685    
       12.63500000     2021.975484417428         3.006530588714619    
       12.63880000     2027.359554616350         3.028628535268987    
       12.64260000     2033.383602097394         3.058748253828946    
       12.64640000     2031.980469144099         3.038870107081359    
       12.65020000     2039.332722498378         3.072032078427620    
       12.65400000     2040.644784367710         3.049552289133886    
       12.65780000     2041.432601655932         3.045096917045776    
       12.66160000     2045.755758026314         3.049983193760927    
       12.66540000     2052.963742868298         3.069108320290673    
       12.66920000     2055.155347330990         3.049683477752693    
       12.67300000     2053.337918197858         3.070649136916907    
       12.67680000     2056.199390004084         3.068729407630985    
       12.68060000     2054.046522882128         3.080628872358882    
       12.68440000     2056.843757003904         3.087233854567639    
       12.68820000     2055.603547254036         3.070569545342180    
       12.69200000     2050.196898946366         3.055657894818688    
       12.69580000     2049.125260528843         3.058807587218735    
       12.69960000     2041.491329879016         3.052934649672211    
       12.70340000     2036.158536427232         3.043758793492138    
       12.70720000     2025.769458476752         3.035558541842204    
       12.71100000     2018.655721667634         3.028220303233430    
       12.71480000     2011.749946778811         3.011530862621224    
       12.71860000     2002.777079950959         2.995645125817567    
       12.72240000     1992.161334567198         2.991606779081605    
       12.72620000     1984.809965882949         2.971029087912826    
       12.73000000     1973.675746754893         2.952813683401373    
       12.73380000     1964.622275046856         2.941816413863544    
       12.73760000     1957.373356410676         2.949524892284306    
       12.74140000     1947.875837703854         2.928691164715768    
       12.74520000     1944.714836703160         2.934872698572244    
       12.74900000     1937.983676773495         2.909679547545781    
       12.75280000     1931.157544150555         2.884448600050392    
       12.75660000     1929.025706833979         2.893672174186217    
       12.76040000     1923.941515523692         2.890958601473572    
       12.76420000     1920.945725098480         2.908033467229838    
       12.76800000     1918.961778973488         2.886774365749109    
       12.77180000     1916.897129192913         2.882634168472442    
       12.77560000     1912.297694622579         2.875576291137409    
       12.77940000     1906.345686672104         2.864176482483083    
       12.78320000     1901.214766436352         2.861328944448834    
       12.78700000     1896.019896570778         2.855110065603253    
       12.79080000     1894.258804263294         2.852936052399697    
       12.79460000     1888.070232882965         2.848374607004700    
       12.79840000     1881.015955299909         2.827932092572579    
       12.80220000     1879.838373249062         2.845234266121343    
       12.80600000     1872.787487962155         2.836326418065929    
       12.80980000     1868.712659494023         2.831010929111046    
       12.81360000     1869.967684725868         2.830131463418266    
       12.81740000     1864.528146102334         2.812562082415985    
       12.82120000     1860.619499534521         2.810892059748860    
       12.82500000     1856.391891942222         2.809873644913290    
       12.82880000     1860.042542954294         2.802116861766331    
       12.83260000     1857.500444535154         2.814545380716404    
       12.83640000     1855.983507031282         2.814172217544724    
       12.84020000     1860.447864079169         2.815033919624650    
       12.84400000     1862.413995934970         2.797771053434287    
       12.84780000     1862.757921363153         2.796286117995844    
       12.85160000     1867.427855114093         2.815061517924249    
       12.85540000     1872.432966495666         2.827878324708581    
       12.85920000     1876.808673077421         2.838082596169535    
       12.86300000     1881.644626507708         2.852562065161839    
       12.86680000     1886.826587923014         2.862561565858997    
       12.87060000     1897.510062871065         2.872727161454050    
       12.87440000     1903.364017129698         2.876212911090390    
       12.87820000     1914.835581646541         2.899897890952624    
       12.88200000     1922.448647854230         2.921694734281932    
       12.88580000     1930.109474225313         2.926195148026523    
       12.88960000     1945.195295766760         2.926359691730719    
       12.89340000     1953.081954567810         2.943637727895847    
       12.89720000     1964.706476927306         2.950506060773042    
       12.90100000     1975.465546587762         2.970079850048242    
       12.90480000     1991.436987651151         2.986266879394575    
       12.90860000     2004.346010689955         2.973606149808792    
       12.91240000     2015.296617134675         3.000371673197661    
       12.91620000     2031.809847643892         3.047725045492549    
       12.92000000     2048.550662937203         3.077519019897321    
       12.92380000     2064.616328397866         3.079479663941180    
       12.92760000     2080.578030273925         3.105193857274664    
       12.93140000     2096.775616473912         3.126657755786864    
       12.93520000     2115.322219362296         3.143715572278955    
       12.93900000     2127.626793336679         3.169213218002460    
       12.94280000     2150.049669331628         3.193118417334272    
       12.94660000     2164.759405643255         3.224272378862825    
       12.95040000     2181.506177138562         3.245851913341820    
       12.95420000     2193.972176901709         3.251239585621230    
       12.95800000     2209.134408044101         3.266249685173234    
       12.96180000     2218.348828888258         3.271138779339196    
       12.96560000     2232.839486850486         3.282758160576888    
       12.96940000     2243.560223454329         3.279757224968684    
       12.97320000     2252.869949746369         3.312929086303617    
       12.97700000     2265.014288526993         3.338393766088085    
       12.98080000     2271.659141616635         3.335513551748608    
       12.98460000     2280.298308472365         3.370245143804513    
       12.98840000     2294.571271381456         3.379357756348991    
       12.99220000     2305.921602097562         3.377515385679570    
       12.99600000     2320.419050196104         3.403300968084712    
       12.99980000     2327.389889528226         3.440522014492069    
       13.00360000     2337.840227774427         3.433308376709797    
       13.00740000     2347.445067791783         3.460644267798858    
       13.01120000     2361.138521930225         3.471456247679509    
       13.01500000     2377.840648418559         3.463427996045041    
       13.01880000     2390.655983853752         3.483839231604883    
       13.02260000     2406.079211231228         3.517249058082894    
       13.02640000     2419.921143023004         3.526286797110904    
       13.03020000     2437.197813102436         3.543262560843759    
       13.03400000     2450.234066510576         3.559471466622458    
       13.03780000     2462.280093119196         3.577229256649973    
       13.04160000     2473.597690422530         3.616586439428031    
       13.04540000     2483.940350849728         3.621178409429092    
       13.04920000     2492.956561179639         3.606175216226279    
       13.05300000     2499.581063149437         3.625567084319484    
       13.05680000     2510.472242064629         3.647094090517412    
       13.06060000     2507.765871084701         3.630260217719516    
       13.06440000     2506.376251206952         3.640258352067466    
       13.06820000     2504.763952923817         3.640642371845870    
       13.07200000     2496.194999372964         3.631615611074216    
       13.07580000     2487.599532473031         3.612770856553129    
       13.07960000     2469.932316999131         3.566712570059678    
       13.08340000     2454.882018337738         3.561624951159486    
       13.08720000     2432.886727090866         3.518501020839465    
       13.09100000     2402.926943894543         3.516902910001455    
       13.09480000     2373.733384603428         3.478972245611969    
       13.09860000     2345.490813568611         3.439863304999724    
       13.10240000     2317.783376281545         3.401382715960978    
       13.10620000     2284.252602933255         3.355180965340168    
       13.11000000     2256.342184510629         3.341702503822299    
       13.11380000     2232.611712826104         3.294752718314731    
       13.11760000     2208.428884486201         3.256240307558750    
       13.12140000     2182.276062866761         3.215552588035508    
       13.12520000     2166.082643265357         3.186676352198233    
       13.12900000     2151.757127058068         3.185943892218788    
       13.13280000     2140.137434952483         3.170967116201706    
       13.13660000     2134.596873957719         3.174759890513995    
       13.14040000     2129.897315966026         3.162890731993479    
       13.14420000     2122.282643036567         3.144352317905150    
       13.14800000     2120.143865924231         3.141795495696726    
       13.15180000     2124.019782264832         3.141042381129851    
       13.15560000     2123.316490846519         3.148568763394724    
       13.15940000     2122.002851545463         3.151191773204155    
       13.16320000     2123.783944349211         3.154738187557166    
       13.16700000     2125.850748487811         3.153407152208445    
       13.17080000     2116.714012952688         3.142929102982229    
       13.17460000     2116.238462184809         3.158148377795599    
       13.17840000     2106.556243084113         3.150492557904994    
       13.18220000     2098.387549621361         3.138474371041665    
       13.18600000     2088.949680644921         3.129305767403047    
       13.18980000     2077.262377768165         3.093392297996515    
       13.19360000     2058.573507672952         3.071874313293673    
       13.19740000     2044.430806871890         3.045596405326734    
       13.20120000     2029.118920464778         3.049684555031354    
       13.20500000     2010.625050937623         3.015468717227502    
       13.20880000     1992.261930754856         2.972003871024178    
       13.21260000     1974.453929024510         2.948033242853831    
       13.21640000     1962.237748644322         2.957735135002543    
       13.22020000     1951.862044632595         2.953188985108490    
       13.22400000     1938.296016855182         2.928227634727115    
       13.22780000     1930.085107689846         2.902221720598342    
       13.23160000     1922.553141496058         2.898788161818953    
       13.23540000     1914.629889214769         2.886002681635699    
       13.23920000     1913.876088241967         2.897690812723486    
       13.24300000     1911.749411164340         2.886924274233438    
       13.24680000     1911.431621480836         2.900260552228902    
       13.25060000     1911.528323923527         2.893720593353070    
       13.25440000     1908.812206283096         2.883639570593349    
       13.25820000     1913.745627608121         2.887372336067596    
       13.26200000     1911.859906012389         2.877641683813270    
       13.26580000     1916.561961397863         2.880339148529825    
       13.26960000     1918.034128921251         2.883466183441252    
       13.27340000     1924.751163360415         2.898106961160311    
       13.27720000     1922.562300305487         2.896029681630727    
       13.28100000     1925.329261117879         2.891102977996463    
       13.28480000     1924.201692786441         2.910360845819354    
       13.28860000     1926.411132345005         2.918655992939006    
       13.29240000     1922.280915079926         2.911575011315899    
       13.29620000     1917.513945366506         2.903847497482807    
       13.30000000     1911.959127023556         2.901005211541109    
       13.30380000     1901.208084758248         2.868211756388796    
       13.30760000     1892.287805986487         2.866766963759209    
       13.31140000     1878.665453615242         2.853104779214097    
       13.31520000     1870.574827519640         2.834614578163082    
       13.31900000     1856.759771826339         2.826057291155273    
       13.32280000     1843.959965068108         2.796265965064515    
       13.32660000     1836.037430813688         2.794025340251857    
       13.33040000     1819.630789634638         2.771349322232342    
       13.33420000     1808.359173816893         2.752935159826083    
       13.33800000     1794.937954320960         2.723555291979589    
       13.34180000     1786.634897224128         2.735869402515395    
       13.34560000     1777.323945755650         2.712411080112230    
       13.34940000     1766.297443990218         2.704787427949499    
       13.35320000     1755.032437119882         2.685730702190803    
       13.35700000     1750.032354923854         2.684523656695877    
       13.36080000     1741.813356651028         2.668578254918564    
       13.36460000     1735.240432507295         2.661599687059830    
       13.36840000     1729.916414783825         2.670888499259565    
       13.37220000     1724.975917450434         2.643444890911699    
       13.37600000     1720.654603547925         2.644172766104157    
       13.37980000     1717.381938725338         2.643573714925741    
       13.38360000     1709.602528546935         2.616103288306777    
       13.38740000     1706.976286182552         2.623462894745770    
       13.39120000     1706.167111113881         2.631441278980861    
       13.39500000     1706.002787156376         2.619848727437496    
       13.39880000     1702.512587711186         2.611052936499292    
       13.40260000     1701.902315313743         2.611619581284827    
       13.40640000     1700.786422773866         2.621394732944933    
       13.41020000     1703.586710290306         2.620153132970643    
       13.41400000     1704.050660066666         2.621840170695053    
       13.41780000     1704.190377251587         2.615181435166258    
       13.42160000     1705.199757867588         2.627726843269966    
       13.42540000     1711.090172454773         2.633243882502976    
       13.42920000     1710.926793569179         2.625090515263838    
       13.43300000     1711.148405990148         2.631482744363713    
       13.43680000     1718.598176638890         2.641271315700748    
       13.44060000     1721.497495554731         2.645937524799825    
       13.44440000     1724.734472700642         2.646613620471062    
       13.44820000     1729.031258176624         2.641488531206924    
       13.45200000     1738.812204393765         2.659464197966011    
       13.45580000     1742.352977672343         2.652122205989837    
       13.45960000     1748.041449937043         2.671426239426033    
       13.46340000     1755.133167152490         2.698469222132933    
       13.46720000     1760.885478661081         2.696734006265419    
       13.47100000     1766.037780887586         2.709347929441874    
       13.47480000     1769.598502573539         2.713626169540623    
       13.47860000     1778.183497736171         2.720039088163485    
       13.48240000     1781.967634381536         2.735997067209288    
       13.48620000     1784.606243464454         2.733822772029786    
       13.49000000     1785.724999413058         2.718852841427012    
       13.49380000     1787.127183975592         2.719424774278714    
       13.49760000     1786.568826550125         2.736267369199366    
       13.50140000     1785.750940560139         2.751245003917776    
       13.50520000     1786.705457365189         2.746130815237216    
       13.50900000     1782.172899231980         2.725831971222557    
       13.51280000     1776.724858449278         2.706152170216053    
       13.51660000     1770.912912512938         2.717363567857206    
       13.52040000     1762.408991197141         2.717814308279948    
       13.52420000     1757.143581448763         2.695831235652109    
       13.52800000     1749.380208470280         2.677771524056990    
       13.53180000     1738.660185091374         2.671476895524822    
       13.53560000     1731.035696868929         2.664149204110079    
       13.53940000     1723.512669511502         2.661272781842019    
       13.54320000     1721.408415196086         2.656774683532934    
       13.54700000     1713.697557049307         2.631589640946909    
       13.55080000     1705.606149145783         2.620287865491754    
       13.55460000     1698.629200747732         2.622413800560333    
       13.55840000     1693.992312472965         2.620199854905049    
       13.56220000     1689.013861345196         2.607853518652731    
       13.56600000     1684.668636123386         2.593556413117469    
       13.56980000     1681.487368040869         2.580994844864166    
       13.57360000     1679.108051953017         2.587427357124910    
       13.57740000     1677.863668286639         2.591445658924371    
       13.58120000     1675.263346126716         2.573459276610572    
       13.58500000     1669.353693755200         2.588605038961072    
       13.58880000     1671.982408089445         2.597646299374041    
       13.59260000     1669.622195310330         2.589023387661026    
       13.59640000     1672.163339947835         2.579223416168040    
       13.60020000     1671.100720299203         2.588408245294962    
       13.60400000     1670.111947911421         2.577153389065772    
       13.60780000     1664.082897678571         2.570545490374585    
       13.61160000     1664.788356670065         2.575586633856664    
       13.61540000     1663.530597630841         2.575804794531104    
       13.61920000     1663.360430260919         2.562703781420839    
       13.62300000     1659.554341961731         2.565567753795722    
       13.62680000     1663.775521950866         2.576594507092458    
       13.63060000     1661.957281321909         2.565289862369446    
       13.63440000     1663.041325133508         2.569329120534899    
       13.63820000     1663.332102254778         2.559436176190582    
       13.64200000     1664.160011481745         2.564797398904247    
       13.64580000     1661.015097638930         2.569552836222718    
       13.64960000     1660.754480859019         2.568240644600312    
       13.65340000     1664.150108012265         2.577729417648910    
       13.65720000     1662.467291443502         2.565368228317168    
       13.66100000     1662.381859885476         2.570156526730120    
       13.66480000     1662.869675008183         2.577810794438927    
       13.66860000     1660.182728246931         2.561833969067483    
       13.67240000     1664.379608887351         2.573664299217012    
       13.67620000     1663.568916359968         2.569333816574905    
       13.68000000     1664.770166990076         2.578800893197663    
       13.68380000     1667.127154369832         2.564170819141550    
       13.68760000     1669.029713784982         2.568123964947343    
       13.69140000     1664.293461679608         2.564607445103252    
       13.69520000     1665.516852371178         2.550300564241471    
       13.69900000     1666.997989161402         2.579519129703855    
       13.70280000     1673.266144478541         2.587457148098104    
       13.70660000     1673.153451298731         2.573440150786144    
       13.71040000     1680.166775829510         2.585343918969882    
       13.71420000     1684.794865341300         2.613709081646442    
       13.71800000     1689.292593265809         2.604983366570375    
       13.72180000     1693.201989322841         2.631335483802507    
       13.72560000     1697.031561549843         2.616204515728559    
       13.72940000     1705.537014361651         2.622470196999686    
       13.73320000     1707.558162252330         2.628898012059481    
       13.73700000     1710.551780086230         2.633950160272905    
       13.74080000     1720.450346027460         2.634657638050550    
       13.74460000     1726.807596661578         2.648319480146577    
       13.74840000     1733.721166508626         2.670973542174126    
       13.75220000     1743.838777190760         2.681299335459536    
       13.75600000     1751.208508199056         2.670333784489347    
       13.75980000     1755.367170488629         2.676912169018592    
       13.76360000     1762.849794021367         2.711225846192935    
       13.76740000     1769.691245327691         2.714094905184075    
       13.77120000     1778.413496122026         2.704197216652455    
       13.77500000     1776.235074353963         2.717691335746192    
       13.77880000     1782.936538510323         2.721739244807450    
       13.78260000     1784.319318020165         2.731832251757714    
       13.78640000     1788.684044569216         2.723906659005545    
       13.79020000     1788.376866758049         2.735476316318346    
       13.79400000     1788.438111799790         2.750216286712026    
       13.79780000     1786.819270628706         2.724430762400022    
       13.80160000     1788.899487919616         2.747684405583025    
       13.80540000     1787.680455799856         2.739761535036781    
       13.80920000     1784.505304389434         2.710046181311781    
       13.81300000     1780.473611788916         2.717225180647715    
       13.81680000     1774.394325677330         2.725571208390051    
       13.82060000     1769.966319267455         2.711753339203707    
       13.82440000     1763.175212355455         2.707065984763185    
       13.82820000     1752.722579171255         2.691485695133419    
       13.83200000     1744.326822137373         2.672355924226315    
       13.83580000     1734.632112109160         2.653962841956139    
       13.83960000     1727.969093823500         2.658513937125566    
       13.84340000     1720.135014121096         2.649583756446807    
       13.84720000     1711.456270282303         2.631032090570556    
       13.85100000     1704.700709127896         2.636376105862832    
       13.85480000     1692.703552943408         2.613683876911904    
       13.85860000     1688.860347700604         2.613641714662509    
       13.86240000     1680.460519524561         2.596429878292999    
       13.86620000     1674.964347784301         2.578566024140789    
       13.87000000     1669.767471151010         2.576793310962554    
       13.87380000     1670.027009254003         2.579460448067732    
       13.87760000     1667.036506253854         2.585257719423119    
       13.88140000     1663.394851329570         2.569621499557235    
       13.88520000     1659.509356129427         2.562937085572423    
       13.88900000     1657.386221431954         2.573309634592711    
       13.89280000     1659.549597137063         2.567655425386847    
       13.89660000     1661.099983521789         2.567830194286338    
       13.90040000     1662.544300849671         2.571550766524489    
       13.90420000     1659.505876728248         2.559089854568132    
       13.90800000     1661.111938034251         2.569278584011572    
       13.91180000     1661.226949352322         2.563295069521240    
       13.91560000     1663.542337308193         2.558895692783866    
       13.91940000     1666.265866857027         2.575040237597003    
       13.92320000     1667.059374931788         2.572741255292398    
       13.92700000     1673.573186150059         2.583933482491534    
       13.93080000     1677.466217167000         2.595301314314855    
       13.93460000     1679.751565953989         2.596633415786744    
       13.93840000     1682.125911163138         2.591489894911115    
       13.94220000     1687.516259307493         2.596798332615251    
       13.94600000     1693.222239467868         2.609819052400111    
       13.94980000     1697.026883294980         2.607366876463434    
       13.95360000     1703.295105582832         2.634529265113636    
       13.95740000     1709.755159379163         2.633832202676103    
       13.96120000     1718.184465326069         2.650192075905878    
       13.96500000     1723.096771155142         2.655318034181281    
       13.96880000     1731.115389805837         2.657585991922176    
       13.97260000     1737.517153248055         2.659971224594614    
       13.97640000     1748.764227245739         2.684760012249030    
       13.98020000     1758.845854523108         2.691082254121127    
       13.98400000     1772.399348750076         2.718634582122312    
       13.98780000     1782.009954919914         2.704182898629533    
       13.99160000     1791.604552363002         2.744019713831636    
       13.99540000     1805.045698073063         2.741940103906338    
       13.99920000     1820.738701930941         2.768736406478362    
       14.00300000     1840.808232002296         2.804398887137544    
       14.00680000     1856.356898063869         2.820550462279528    
       14.01060000     1879.152520723894         2.844704306397380    
       14.01440000     1904.194641687188         2.873465276632735    
       14.01820000     1930.626349486947         2.922279774776468    
       14.02200000     1959.226009284818         2.980801967640545    
       14.02580000     1992.252364177741         2.998095016143721    
       14.02960000     2024.849787547144         3.032861801813532    
       14.03340000     2068.017076519029         3.090451813673520    
       14.03720000     2101.419580262823         3.139711714310347    
       14.04100000     2151.374031301694         3.181045588776315    
       14.04480000     2197.599871317069         3.257446690310302    
       14.04860000     2251.864298277832         3.487690302144148    
       14.05240000     2298.522422290222         3.508690724949477    
       14.05620000     2357.102160686894         3.474804635930936    
       14.06000000     2411.188199536543         3.633820592029684    
       14.06380000     2475.719373808886         3.744878924956663    
       14.06760000     2533.456684997002         3.706211124484410    
       14.07140000     2591.960430979512         3.842016351670885    
       14.07520000     2648.000963432095         4.007330492818510    
       14.07900000     2705.835959162166         3.902818154030354    
       14.08280000     2761.248282731240         3.973334175904106    
       14.08660000     2813.254194817499         4.035054211062215    
       14.09040000     2851.252997162288         4.095371218639029    
       14.09420000     2886.257779823829         4.128586103928088    
       14.09800000     2911.369415087046         4.144534948684163    
       14.10180000     2926.974409409578         4.200821993976448    
       14.10560000     2931.580434779833         4.212608496738318    
       14.10940000     2928.250367146728         4.184044183408763    
       14.11320000     2902.540812558241         4.132213120962382    
       14.11700000     2876.925102036342         4.116996256235577    
       14.12080000     2841.078892224118         4.089253418659589    
       14.12460000     2796.521431777844         3.998180401897706    
       14.12840000     2739.660179791661         3.943421605509606    
       14.13220000     2682.244758488524         4.269182724314881    
       14.13600000     2620.204922577288         4.232624499427742    
       14.13980000     2552.964806602236         4.345555484243137    
       14.14360000     2487.428306670765         4.299421796879442    
       14.14740000     2421.123674127596         4.216901161364278    
       14.15120000     2355.179394678450         4.190423274666465    
       14.15500000     2290.516072956066         3.903687812291826    
       14.15880000     2233.979171351116         3.875855109294370    
       14.16260000     2179.673904016927         3.584621016600565    
       14.16640000     2129.977656005407         3.342907102991938    
       14.17020000     2090.133633117880         3.119661448114639    
       14.17400000     2051.834019140063         3.089765610296352    
       14.17780000     2017.914375897761         3.021585485357495    
       14.18160000     1988.168173205618         2.970753784597423    
       14.18540000     1963.285437010930         2.960574878107566    
       14.18920000     1941.500880520137         2.932233741087608    
       14.19300000     1924.007517025715         2.920404482772960    
       14.19680000     1907.363213379609         2.893347436482056    
       14.20060000     1896.719863800715         2.860112756192733    
       14.20440000     1888.197485047945         2.844289825887956    
       14.20820000     1882.456706460670         2.846744826264112    
       14.21200000     1876.635493331736         2.846251995569446    
       14.21580000     1870.889403715229         2.837127300523147    
       14.21960000     1868.046921333748         2.832554084018331    
       14.22340000     1864.030474465443         2.826629731775180    
       14.22720000     1866.208762332913         2.837254035444137    
       14.23100000     1865.661497519565         2.840119843193600    
       14.23480000     1865.194654521364         2.835865825732263    
       14.23860000     1868.377326305901         2.815280068251731    
       14.24240000     1866.581409520225         2.836059802524749    
       14.24620000     1864.480571929313         2.823863058144884    
       14.25000000     1863.142771921467         2.820530015042947    
       14.25380000     1862.005938275188         2.839492982267738    
       14.25760000     1860.210463853575         2.827536786318309    
       14.26140000     1857.209921169137         2.815916918922990    
       14.26520000     1854.267289121073         2.819895809124848    
       14.26900000     1848.049268741031         2.800808395077615    
       14.27280000     1840.813618676384         2.777629432152990    
       14.27660000     1834.279904736231         2.795087605200162    
       14.28040000     1831.491713677795         2.801363338227899    
       14.28420000     1820.719713196877         2.764296531190523    
       14.28800000     1810.667979711305         2.757445209521360    
       14.29180000     1800.514206411806         2.739229853139320    
       14.29560000     1790.076251343032         2.723367810844222    
       14.29940000     1774.471832217476         2.702589966862295    
       14.30320000     1761.704671739417         2.696653627413606    
       14.30700000     1748.132387896542         2.686507889031429    
       14.31080000     1732.785122423829         2.650706091455511    
       14.31460000     1717.677018724807         2.636293002180973    
       14.31840000     1703.566736583896         2.622654983365350    
       14.32220000     1687.451073061296         2.622697855700047    
       14.32600000     1670.724892477880         2.606311362809312    
       14.32980000     1655.483561561376         2.573135356502623    
       14.33360000     1641.834196285859         2.530493905867726    
       14.33740000     1628.189616158733         2.532904417739394    
       14.34120000     1618.912231453368         2.515736644490195    
       14.34500000     1605.079297619443         2.490468687051358    
       14.34880000     1597.267495981038         2.491244054261564    
       14.35260000     1587.478610834124         2.497224901915097    
       14.35640000     1580.079601255014         2.465618903587052    
       14.36020000     1573.037657131257         2.451882694228116    
       14.36400000     1563.790931025728         2.449108848152564    
       14.36780000     1556.630090375664         2.443118956951491    
       14.37160000     1557.522930414821         2.436724470966306    
       14.37540000     1549.667437506678         2.409836431665725    
       14.37920000     1549.425276259105         2.422657521214877    
       14.38300000     1542.391053040972         2.432514397728140    
       14.38680000     1539.322174936460         2.418138793665705    
       14.39060000     1536.264201374028         2.407794019325765    
       14.39440000     1534.020264444166         2.411877710138689    
       14.39820000     1531.821829779650         2.413089511519307    
       14.40200000     1531.265844504286         2.396171629206998    
       14.40580000     1528.959182328036         2.417715878935946    
       14.40960000     1531.486123935192         2.406773178805479    
       14.41340000     1528.131224480853         2.384669459399809    
       14.41720000     1523.095861508327         2.388918112881700    
       14.42100000     1522.985919632295         2.410362734652610    
       14.42480000     1522.656642678003         2.391408293939911    
       14.42860000     1518.114868510484         2.379501504467362    
       14.43240000     1520.023663772255         2.395794121760023    
       14.43620000     1515.520505433745         2.374795961988776    
       14.44000000     1514.975332555523         2.377272963218247    
       14.44380000     1513.772850114071         2.382755982608444    
       14.44760000     1513.611961736788         2.378356654137974    
       14.45140000     1511.528341919979         2.369340067923597    
       14.45520000     1510.304256826777         2.378001221257252    
       14.45900000     1509.924777690655         2.372629972774670    
       14.46280000     1510.324451569311         2.380297808092870    
       14.46660000     1508.563946515291         2.381341314998866    
       14.47040000     1511.066214291047         2.377337636591381    
       14.47420000     1509.899690617042         2.382863837605936    
       14.47800000     1510.684218071830         2.379789191148215    
       14.48180000     1512.539882848650         2.374683068123778    
       14.48560000     1513.873973779222         2.386009511524161    
       14.48940000     1514.575642949701         2.391217341664018    
       14.49320000     1515.714310314669         2.395588590051644    
       14.49700000     1517.987701978631         2.392258279359275    
       14.50080000     1518.407333594693         2.383176999536155    
       14.50460000     1517.588163721671         2.377862467828893    
       14.50840000     1517.463394950695         2.371459931700149    
       14.51220000     1518.827767147013         2.382003365667431    
       14.51600000     1519.019662913231         2.381166166729868    
       14.51980000     1515.703418670231         2.385121580900434    
       14.52360000     1514.029816182073         2.384315054971581    
       14.52740000     1515.559221053988         2.390301185875896    
       14.53120000     1515.580272353701         2.387780217840309    
       14.53500000     1513.278089321792         2.376906145022855    
       14.53880000     1512.741876285627         2.379356861978624    
       14.54260000     1511.856416349825         2.387932509836759    
       14.54640000     1506.657108439790         2.379819689895961    
       14.55020000     1504.048601550295         2.367371396139917    
       14.55400000     1502.941897697472         2.366320579442950    
       14.55780000     1503.360577542085         2.362294964481852    
       14.56160000     1500.621491918892         2.350998462028220    
       14.56540000     1499.204364159533         2.349884735739511    
       14.56920000     1498.944906870412         2.353556251075448    
       14.57300000     1495.365493503533         2.342670796877309    
       14.57680000     1492.436325598359         2.347535068624504    
       14.58060000     1494.877840707020         2.356445415914309    
       14.58440000     1493.076406330557         2.353520624017289    
       14.58820000     1492.142047765563         2.340947719267249    
       14.59200000     1490.151698782796         2.352767567351893    
       14.59580000     1487.683527342206         2.343440535081814    
       14.59960000     1485.536442612258         2.346162446861014    
       14.60340000     1488.890357327028         2.346356527763535    
       14.60720000     1485.907640609623         2.355940193223456    
       14.61100000     1487.458338620246         2.357104364459292    
       14.61480000     1486.988454686627         2.344371463813200    
       14.61860000     1486.518696804340         2.346501192612955    
       14.62240000     1484.445477680536         2.360225088753775    
       14.62620000     1484.148151124624         2.360125091852758    
       14.63000000     1483.569419556167         2.349380217601047    
       14.63380000     1486.956800940506         2.355593413866712    
       14.63760000     1482.198185433218         2.352854169518910    
       14.64140000     1483.880069014717         2.338458709064351    
       14.64520000     1485.876574732956         2.325356604940084    
       14.64900000     1485.788393220128         2.336783401957919    
       14.65280000     1487.015872356260         2.352067236053449    
       14.65660000     1486.078671606901         2.340652962707487    
       14.66040000     1485.730075516963         2.333111151768969    
       14.66420000     1488.644449804554         2.352467614567283    
       14.66800000     1484.355901299059         2.334224578691835    
       14.67180000     1487.662641250177         2.337246230030878    
       14.67560000     1488.739887080943         2.341796071667195    
       14.67940000     1489.085012732603         2.339829332976659    
       14.68320000     1489.817108378770         2.350608613829637    
       14.68700000     1488.134220163650         2.350683450772980    
       14.69080000     1488.517644313799         2.351691072136775    
       14.69460000     1490.152366418164         2.350945875239444    
       14.69840000     1488.298021415879         2.345348121396690    
       14.70220000     1488.285772918806         2.352119955596016    
       14.70600000     1484.001227025197         2.347811368287843    
       14.70980000     1487.463144924356         2.342454874558919    
       14.71360000     1484.886657972601         2.332011764591066    
       14.71740000     1483.371844738545         2.333434703836962    
       14.72120000     1479.416014346780         2.354130268122887    
       14.72500000     1479.521599823962         2.329238602816543    
       14.72880000     1476.192426315313         2.334200538219329    
       14.73260000     1474.745474228789         2.323562302140059    
       14.73640000     1475.401095077671         2.312865736365983    
       14.74020000     1477.159999743009         2.322545397686220    
       14.74400000     1475.307049060130         2.329474587525958    
       14.74780000     1472.832460180521         2.330464810855986    
       14.75160000     1469.833950723985         2.329110613568566    
       14.75540000     1467.244018988066         2.313296000162026    
       14.75920000     1470.242854442764         2.314002999673221    
       14.76300000     1470.341682163717         2.325396205125902    
       14.76680000     1468.049463317157         2.325264142839926    
       14.77060000     1472.038339240215         2.329820602392510    
       14.77440000     1473.435610503240         2.329200262075379    
       14.77820000     1474.454019444547         2.316193455765229    
       14.78200000     1477.281616837545         2.325540000268108    
       14.78580000     1478.477314748497         2.330882366293400    
       14.78960000     1478.051982814201         2.334986014918456    
       14.79340000     1483.908169307107         2.356983352776389    
       14.79720000     1485.750073126771         2.344153328887093    
       14.80100000     1490.608119773644         2.345878110087501    
       14.80480000     1492.431145836181         2.346720732972369    
       14.80860000     1494.967940399780         2.353801818966061    
       14.81240000     1500.818054545085         2.359062291346442    
       14.81620000     1501.550848827095         2.360621503466101    
       14.82000000     1504.310626188093         2.371328175545190    
       14.82380000     1509.223427870141         2.378287627133056    
       14.82760000     1513.416641898475         2.384486884171084    
       14.83140000     1512.857046090126         2.394042008931409    
       14.83520000     1513.225845494300         2.393043808745192    
       14.83900000     1517.180154943465         2.393844466602706    
       14.84280000     1521.003440499555         2.398843543951593    
       14.84660000     1525.316006425718         2.399754522822823    
       14.85040000     1526.397233160754         2.398935846695425    
       14.85420000     1527.148128245988         2.383219628650902    
       14.85800000     1529.272922598095         2.388273413266794    
       14.86180000     1531.906531006078         2.393583591090091    
       14.86560000     1532.116552305811         2.405730104491960    
       14.86940000     1532.474404091864         2.402982705366833    
       14.87320000     1532.275033059776         2.379174528595307    
       14.87700000     1531.847261584184         2.402217291626431    
       14.88080000     1531.627476824473         2.418839715197724    
       14.88460000     1532.151429185984         2.406411532826503    
       14.88840000     1530.638261687831         2.397236632676301    
       14.89220000     1529.080279038003         2.407172731429965    
       14.89600000     1530.222043146257         2.404554773814974    
       14.89980000     1529.718624661768         2.397277304122562    
       14.90360000     1528.003295710758         2.400711011393585    
       14.90740000     1527.385399822361         2.414305663741076    
       14.91120000     1529.341949122988         2.415870193479212    
       14.91500000     1529.656640163753         2.411225740493943    
       14.91880000     1524.608313903341         2.398887258126196    
       14.92260000     1522.138949104671         2.401744066370336    
       14.92640000     1522.468752637369         2.406970908011370    
       14.93020000     1520.732230803419         2.403547385266279    
       14.93400000     1520.324682704683         2.381192242908375    
       14.93780000     1515.138739705488         2.387129751922796    
       14.94160000     1513.217262897844         2.380485634908506    
       14.94540000     1510.690836334128         2.364395386389665    
       14.94920000     1511.736805615126         2.377224080521795    
       14.95300000     1505.318369536863         2.380252848810528    
       14.95680000     1501.108744211969         2.361840457987760    
       14.96060000     1499.149254047003         2.361443278030598    
       14.96440000     1492.501339328073         2.341696926752514    
       14.96820000     1489.071857869310         2.341232487226740    
       14.97200000     1487.459676983543         2.336688471875824    
       14.97580000     1480.193586971544         2.322207904892380    
       14.97960000     1478.908936293723         2.322365255522522    
       14.98340000     1472.971064473465         2.321340234854883    
       14.98720000     1470.002510903465         2.324996937348187    
       14.99100000     1468.607939100232         2.307817194580638    
       14.99480000     1465.436286063514         2.314904005792799    
       14.99860000     1459.925055169460         2.305068067654866    
       15.00240000     1464.024622351200         2.325562221212818    
       15.00620000     1461.349002652933         2.324708458806872    
       15.01000000     1466.903721701424         2.323067932604360    
       15.01380000     1461.434911925824         2.306982924189428    
       15.01760000     1466.069100147160         2.315155035592410    
       15.02140000     1468.768552615268         2.320558261652641    
       15.02520000     1474.810223705962         2.328042541411584    
       15.02900000     1479.245267431088         2.331688488500302    
       15.03280000     1484.615460500921         2.334206281355709    
       15.03660000     1492.136782910595         2.343648890697488    
       15.04040000     1497.633297500883         2.346256320508230    
       15.04420000     1505.020358513079         2.374061089936577    
       15.04800000     1513.792674180087         2.358717887523277    
       15.05180000     1522.886225490319         2.390500571940103    
       15.05560000     1527.807662431899         2.767198602109262    
       15.05940000     1539.052971347542         2.769935798095465    
       15.06320000     1545.787875117374         2.794917961499281    
       15.06700000     1553.838501300852         2.806307634652284    
       15.07080000     1563.370960368781         2.813006452377909    
       15.07460000     1571.896817231148         2.829896907599756    
       15.07840000     1578.365922773251         2.838422014307005    
       15.08220000     1585.421293369236         2.834508116696506    
       15.08600000     1596.015134480175         2.861177450322733    
       15.08980000     1602.784339634292         2.888143629296724    
       15.09360000     1609.283875808953         2.901550003014732    
       15.09740000     1615.450860546878         2.910525926439663    
       15.10120000     1623.937109548593         2.915539258109292    
       15.10500000     1625.341262930053         2.908697371522764    
       15.10880000     1627.451928526155         2.925528236440842    
       15.11260000     1632.198529756822         2.919949324705423    
       15.11640000     1632.259760214893         2.916510355684135    
       15.12020000     1631.186016957882         2.924063196701654    
       15.12400000     1631.037527695475         2.932358559967156    
       15.12780000     1627.766769679160         2.927132841104210    
       15.13160000     1622.458551384308         2.928185655885276    
       15.13540000     1620.258399646654         2.916548923353583    
       15.13920000     1616.461565262693         2.912099284942923    
       15.14300000     1610.579875963281         2.911013517224859    
       15.14680000     1605.546941222679         2.897174112488528    
       15.15060000     1601.917461466449         2.875770581032774    
       15.15440000     1597.232058533428         2.857415976705216    
       15.15820000     1592.304400526316         2.853398673230470    
       15.16200000     1588.434405007986         2.850860266584830    
       15.16580000     1586.824241409429         2.842399751226716    
       15.16960000     1586.045368007627         2.841553561114888    
       15.17340000     1586.658416178736         2.836669835511482    
       15.17720000     1584.389335016722         2.849234236296852    
       15.18100000     1587.771542228723         2.866375127336034    
       15.18480000     1591.038183580864         2.868805828615384    
       15.18860000     1594.214661082869         2.866157922392221    
       15.19240000     1597.102513485959         2.872603688627466    
       15.19620000     1601.722934291479         2.887048722518544    
       15.20000000     1605.869752985885         2.889916065565960    
       15.20380000     1612.880004379108         2.894269845168945    
       15.20760000     1618.459281187685         2.919564165723396    
       15.21140000     1626.234975571142         2.943945110928536    
       15.21520000     1630.186795271658         2.949343660294490    
       15.21900000     1635.028842795072         2.927551617414903    
       15.22280000     1637.936188363210         2.943092181656889    
       15.22660000     1641.867967478311         2.958709328616520    
       15.23040000     1643.992316690392         2.948679629347349    
       15.23420000     1646.227104332142         2.954309114638949    
       15.23800000     1647.572177220534         2.954378778893507    
       15.24180000     1644.998581135080         2.949210882520822    
       15.24560000     1643.039218507928         2.622993423760305    
       15.24940000     1641.781812442678         2.517487390745662    
       15.25320000     1635.221718933817         2.520315000274567    
       15.25700000     1629.236040872284         2.505998371931808    
       15.26080000     1623.828827670156         2.509841371457288    
       15.26460000     1612.821057294285         2.504988101499165    
       15.26840000     1601.664595550211         2.482046744385923    
       15.27220000     1595.687988535839         2.458552147174443    
       15.27600000     1584.942126797482         2.461576404647178    
       15.27980000     1576.603014202208         2.448997731290005    
       15.28360000     1563.904719669545         2.430185069721333    
       15.28740000     1551.193717055701         2.424601915353444    
       15.29120000     1540.512065439647         2.400711304846106    
       15.29500000     1528.171977287482         2.379961878309437    
       15.29880000     1518.150603313228         2.375721202586597    
       15.30260000     1507.622143787434         2.371859970420993    
       15.30640000     1499.786714411128         2.378892895384772    
       15.31020000     1487.117154663430         2.347827611159910    
       15.31400000     1476.494083999582         2.329410663601487    
       15.31780000     1472.131812607350         2.317538897251526    
       15.32160000     1465.143275862374         2.319778015536548    
       15.32540000     1456.305546860645         2.308437104194879    
       15.32920000     1452.643762574435         2.299909276248887    
       15.33300000     1448.981370862121         2.313549426633348    
       15.33680000     1440.387771147513         2.261828280706168    
       15.34060000     1438.924241501198         2.266488582379260    
       15.34440000     1432.542809075140         2.272805097196160    
       15.34820000     1426.275161391915         2.247039102718622    
       15.35200000     1422.763077274776         2.252705842613214    
       15.35580000     1422.624290109144         2.605923981684739    
       15.35960000     1421.288769832734         2.604749244742953    
       15.36340000     1419.667769662325         2.600886875478893    
       15.36720000     1418.541572525550         2.601030532782411    
       15.37100000     1420.225984787195         2.598477619590743    
       15.37480000     1417.813596821793         2.623335129381939    
       15.37860000     1417.223609072545         2.603903886990436    
       15.38240000     1417.088103094277         2.599544773880471    
       15.38620000     1417.714115864803         2.588424402744903    
       15.39000000     1418.302190608518         2.587410138095794    
       15.39380000     1418.800123706794         2.615420956009149    
       15.39760000     1418.693207475089         2.605592314644193    
       15.40140000     1417.226602107369         2.602981788748704    
       15.40520000     1416.188599441096         2.604492970097891    
       15.40900000     1417.900276208682         2.593455869435669    
       15.41280000     1415.866394112476         2.609213592587705    
       15.41660000     1415.122411537970         2.597686249942253    
       15.42040000     1413.346579044715         2.582124598552349    
       15.42420000     1410.701110521406         2.598428837906733    
       15.42800000     1411.115842934353         2.593321026660286    
       15.43180000     1409.217624350737         2.599166953815077    
       15.43560000     1406.036393050550         2.598343026798900    
       15.43940000     1403.763294129615         2.593593706233570    
       15.44320000     1400.693035137217         2.591147467166585    
       15.44700000     1398.487640898414         2.590308866388554    
       15.45080000     1396.450077994994         2.578902497452251    
       15.45460000     1392.815527529532         2.560353925446122    
       15.45840000     1389.332151661488         2.540178158384178    
       15.46220000     1385.956768129684         2.530034075972389    
       15.46600000     1383.569378073723         2.542159745727758    
       15.46980000     1384.290374477016         2.551773521175736    
       15.47360000     1383.570216177840         2.543876620569678    
       15.47740000     1381.086528318238         2.533509899783348    
       15.48120000     1380.579599643664         2.554548676715247    
       15.48500000     1378.122838736963         2.559687449635025    
       15.48880000     1380.418537883675         2.548733024552351    
       15.49260000     1382.953918313674         2.559883615963018    
       15.49640000     1383.768621422193         2.560882806091765    
       15.50020000     1385.136691294833         2.555291530084723    
       15.50400000     1387.010350536581         2.553042611943315    
       15.50780000     1388.080787532842         2.567550228435183    
       15.51160000     1388.667287741676         2.571412714744926    
       15.51540000     1389.302132132590         2.572286495595494    
       15.51920000     1389.967678957993         2.573370730322512    
       15.52300000     1392.221234405700         2.571041044077766    
       15.52680000     1395.713548181508         2.582191873035608    
       15.53060000     1398.322318888588         2.588832610845648    
       15.53440000     1401.305502626081         2.578411881083007    
       15.53820000     1399.765298651054         2.587221327207547    
       15.54200000     1402.044773969644         2.583667636315201    
       15.54580000     1404.101251748296         2.296459438199481    
       15.54960000     1406.239787800065         2.213856482480321    
       15.55340000     1405.429214942941         2.227584175084948    
       15.55720000     1406.111003806846         2.231484773289401    
       15.56100000     1405.377485392380         2.232975810282209    
       15.56480000     1406.523334893089         2.237019978236827    
       15.56860000     1404.557088959820         2.220760772113182    
       15.57240000     1402.065845223773         2.221071180387629    
       15.57620000     1401.221716557068         2.217798034047172    
       15.58000000     1403.240218858336         2.223620804714770    
       15.58380000     1399.869615809468         2.219423211009909    
       15.58760000     1395.552319792029         2.226063863486564    
       15.59140000     1393.598904431098         2.212440173987318    
       15.59520000     1389.443697353514         2.199901973927828    
       15.59900000     1384.580895930184         2.203856566700924    
       15.60280000     1381.630679142223         2.205547871693385    
       15.60660000     1374.385971134230         2.204894763472274    
       15.61040000     1374.030422095857         2.196285472940039    
       15.61420000     1372.301965384223         2.194183727090552    
       15.61800000     1369.091262122511         2.193694472079037    
       15.62180000     1368.282127671690         2.194045408351923    
       15.62560000     1370.628393937614         2.186480290153686    
       15.62940000     1370.056816323201         2.194803353903985    
       15.63320000     1367.006525062958         2.189569732210761    
       15.63700000     1369.231369955847         2.185991587278779    
       15.64080000     1369.638740500084         2.182093863282411    
       15.64460000     1372.894310989116         2.191075067222456    
       15.64840000     1376.002403347262         2.198452650790401    
       15.65220000     1378.050205997975         2.187283419202735    
       15.65600000     1380.645049101573         2.276315866536250    
       15.65980000     1385.737596108352         2.520885229879510    
       15.66360000     1387.787585026109         2.557833341694765    
       15.66740000     1389.258951795257         2.552503328166688    
       15.67120000     1398.102465562241         2.570759619565888    
       15.67500000     1402.227417302226         2.595772014178486    
       15.67880000     1405.686756848285         2.573208971190163    
       15.68260000     1405.828440156638         2.569766000313418    
       15.68640000     1411.085848292423         2.573600442238265    
       15.69020000     1414.892708654954         2.588284122739398    
       15.69400000     1417.887261960719         2.613381420621445    
       15.69780000     1419.637720472378         2.592010807099903    
       15.70160000     1421.911066238982         2.612544659508235    
       15.70540000     1423.287286159380         2.612762559342331    
       15.70920000     1423.046613109731         2.600519595651330    
       15.71300000     1419.249250050104         2.614337400880141    
       15.71680000     1421.397122563351         2.606235957231764    
       15.72060000     1419.515412885482         2.590956355465873    
       15.72440000     1417.585929526218         2.604693207474366    
       15.72820000     1413.600325625842         2.590075925986735    
       15.73200000     1412.684069097294         2.606448249745994    
       15.73580000     1405.839175453852         2.589296735605974    
       15.73960000     1402.764011382466         2.585603410858494    
       15.74340000     1398.114741132521         2.564266941787145    
       15.74720000     1394.352943832507         2.565144434080380    
       15.75100000     1391.041401387540         2.565192047994330    
       15.75480000     1386.618443131819         2.545736987620273    
       15.75860000     1380.823301324127         2.527343989629693    
       15.76240000     1374.139454976633         2.514082935985881    
       15.76620000     1370.849783893029         2.524304681697613    
       15.77000000     1367.075231416821         2.517366523629877    
       15.77380000     1361.918801938505         2.494239514522538    
       15.77760000     1357.677949467805         2.502809221242553    
       15.78140000     1353.577994135715         2.507975353542737    
       15.78520000     1349.430832442819         2.502607957865201    
       15.78900000     1347.715389609517         2.480381054993859    
       15.79280000     1348.473698980305         2.488121159604476    
       15.79660000     1347.028709973080         2.485825954256511    
       15.80040000     1344.156622448555         2.480632827173143    
       15.80420000     1343.134995072399         2.493065010966870    
       15.80800000     1344.678803758087         2.495036045630277    
       15.81180000     1344.334555366031         2.491090915170485    
       15.81560000     1345.720804719763         2.508721987398387    
       15.81940000     1349.043456983382         2.498671081399387    
       15.82320000     1352.157663653516         2.503275980980530    
       15.82700000     1355.891724968492         2.515077938323817    
       15.83080000     1357.590526317666         2.503476056788470    
       15.83460000     1365.616597079954         2.514277555097184    
       15.83840000     1371.602657411296         2.516483505039393    
       15.84220000     1374.052370679222         2.526006397698075    
       15.84600000     1376.854902394609         2.453592383705898    
       15.84980000     1380.997176497735         2.286014373265790    
       15.85360000     1385.778773090118         2.201929674582501    
       15.85740000     1390.422214120983         2.212451814469543    
       15.86120000     1392.969273341980         2.218260961559156    
       15.86500000     1397.216291314542         2.221430928087941    
       15.86880000     1400.635785134182         2.232946469384153    
       15.87260000     1407.639395453067         2.238278728066319    
       15.87640000     1408.422499468638         2.222223215774183    
       15.88020000     1411.901868702881         2.238667704311398    
       15.88400000     1414.245080145526         2.244549345879158    
       15.88780000     1415.312666154659         2.249209147242383    
       15.89160000     1419.323489265840         2.251994056426514    
       15.89540000     1420.988523087116         2.255513534678651    
       15.89920000     1423.034926339584         2.246826319192041    
       15.90300000     1426.611272436948         2.257844497628637    
       15.90680000     1428.510992946853         2.269234459967964    
       15.91060000     1429.249993520870         2.275312938767088    
       15.91440000     1429.439371831209         2.274769181516514    
       15.91820000     1429.433514942782         2.273461550783278    
       15.92200000     1433.179703956901         2.270654553396801    
       15.92580000     1436.074288967257         2.261722572663536    
       15.92960000     1436.792724902959         2.275053283797239    
       15.93340000     1437.001984957494         2.287334179876871    
       15.93720000     1436.201378350858         2.273132654066912    
       15.94100000     1442.722304574308         2.269642045402157    
       15.94480000     1439.957103391075         2.279167989488093    
       15.94860000     1441.541873384460         2.269775537176037    
       15.95240000     1436.560180731376         2.280369805855828    
       15.95620000     1435.019581404470         2.520419288219824    
       15.96000000     1436.626937863127         2.613168204012485    
       15.96380000     1433.504631282387         2.620352280504788    
       15.96760000     1429.286955853045         2.608982161436644    
       15.97140000     1431.509273506885         2.615397395395573    
       15.97520000     1419.347818405455         2.601982193387593    
       15.97900000     1420.173348000131         2.623049392916821    
       15.98280000     1415.999962070727         2.593230145333267    
       15.98660000     1407.627791688172         2.582105069423647    
       15.99040000     1401.610049470228         2.563458160278768    
       15.99420000     1397.205523567889         2.580735323565789    
       15.99800000     1392.015044058431         2.553665685704891    
       16.00180000     1384.347461432071         2.561590196701055    
       16.00560000     1379.347102278006         2.536311803342347    
       16.00940000     1367.005846894519         2.510186718526093    
       16.01320000     1358.907350258783         2.508209369826771    
       16.01700000     1354.279576054307         2.520281951632907    
       16.02080000     1347.291034583064         2.500153862287375    
       16.02460000     1342.976628790752         2.474000876300628    
       16.02840000     1335.935538794882         2.457764754899225    
       16.03220000     1332.590129452610         2.472450882095485    
       16.03600000     1325.350817569778         2.466740080599889    
       16.03980000     1323.254494823839         2.454823209000658    
       16.04360000     1323.004119785271         2.446313914569120    
       16.04740000     1318.119666716941         2.447260746952385    
       16.05120000     1313.562506394483         2.453627034084641    
       16.05500000     1315.884847997502         2.458470423049794    
       16.05880000     1311.825805359203         2.428637247044107    
       16.06260000     1312.483263894881         2.428510849032696    
       16.06640000     1316.035628303086         2.432990569713929    
       16.07020000     1316.155580837978         2.429443451670419    
       16.07400000     1317.226898361227         2.439659558836293    
       16.07780000     1319.647750651327         2.440806308909985    
       16.08160000     1322.951545187012         2.436826912906481    
       16.08540000     1322.944658408670         2.447110175970518    
       16.08920000     1325.508472189453         2.440543446536847    
       16.09300000     1328.658504662782         2.442939849253545    
       16.09680000     1334.305721559558         2.463449031716140    
       16.10060000     1335.820140241799         2.477465989023622    
       16.10440000     1338.859826774670         2.475875678931547    
       16.10820000     1342.394607761002         2.484837725498228    
       16.11200000     1344.932285275818         2.491313426102852    
       16.11580000     1347.969535807782         2.508550608308704    
       16.11960000     1348.527318231909         2.496716277089286    
       16.12340000     1348.836427566644         2.486369644539806    
       16.12720000     1347.728290971756         2.491192988248783    
       16.13100000     1345.840528993063         2.489592619266922    
       16.13480000     1344.346048214868         2.487488644673432    
       16.13860000     1343.126834602794         2.474066696783487    
       16.14240000     1339.789800151922         2.471968188909420    
       16.14620000     1334.384727877570         2.244324704154999    
       16.15000000     1330.529029434821         2.138145294529016    
       16.15380000     1325.086371723895         2.125971771256565    
       16.15760000     1316.280169560875         2.112791431585733    
       16.16140000     1311.052985102819         2.102937188675712    
       16.16520000     1306.849626814748         2.108192283501031    
       16.16900000     1302.448256306913         2.105623790064183    
       16.17280000     1298.860686166981         2.094954413706471    
       16.17660000     1292.605309810142         2.086244061780445    
       16.18040000     1287.888545176953         2.080635600445389    
       16.18420000     1281.039892280751         2.077145819081993    
       16.18800000     1276.762356957579         2.084919384327153    
       16.19180000     1272.206179179752         2.064740378231074    
       16.19560000     1268.662381556356         2.054488803505870    
       16.19940000     1264.799474682285         2.051719321368245    
       16.20320000     1262.613259739917         2.044392114258610    
       16.20700000     1260.686191688664         2.042904627548432    
       16.21080000     1255.352338558948         2.047525775565632    
       16.21460000     1251.514054975062         2.038452792842107    
       16.21840000     1250.344246254080         2.042365636126165    
       16.22220000     1248.341091564583         2.036025479305640    
       16.22600000     1246.928518961452         2.021213772867704    
       16.22980000     1240.129124594197         2.025351633456010    
       16.23360000     1239.586076952734         2.016474451730939    
       16.23740000     1236.641603200565         2.016368424918867    
       16.24120000     1236.225338594693         2.012703914133839    
       16.24500000     1234.382584947418         2.010528232831251    
       16.24880000     1231.016097584197         2.013554376082770    
       16.25260000     1228.731869619163         1.997296806567137    
       16.25640000     1228.864663617232         2.007066714349505    
       16.26020000     1229.559357294812         2.009265756453631    
       16.26400000     1229.247894719582         2.013985747793689    
       16.26780000     1227.335753152124         2.000647397430387    
       16.27160000     1226.479247568611         1.991111652069135    
       16.27540000     1227.780903987104         2.014443421020079    
       16.27920000     1226.660739787490         2.015400107655389    
       16.28300000     1222.680332594725         1.997216291725032    
       16.28680000     1223.628222767711         1.998273116993690    
       16.29060000     1220.329487998795         1.983626964968059    
       16.29440000     1224.624307332402         2.017825419586432    
       16.29820000     1224.573960591672         2.003717932495156    
       16.30200000     1228.283986778790         2.012084258544874    
       16.30580000     1228.075837716018         2.005813574122939    
       16.30960000     1228.288222312910         1.998920370591770    
       16.31340000     1229.591487912330         2.004269164221290    
       16.31720000     1229.300223372983         2.010932436182639    
       16.32100000     1231.362598199081         2.015564227880863    
       16.32480000     1236.839490358030         2.023135867498987    
       16.32860000     1235.531680608847         2.001477959895506    
       16.33240000     1240.003699719359         2.020599608124735    
       16.33620000     1242.627457348266         2.028162250802848    
       16.34000000     1247.059491953292         2.022017715994196    
       16.34380000     1252.916752746001         2.038607831529396    
       16.34760000     1256.570413851174         2.050440021915533    
       16.35140000     1260.952288058224         2.052072189748025    
       16.35520000     1267.574349407186         2.052723293708993    
       16.35900000     1271.493374571888         2.050433080637388    
       16.36280000     1281.455629770100         2.062671401361441    
       16.36660000     1287.100730376749         2.070890139324829    
       16.37040000     1293.673419059543         2.073822989228565    
       16.37420000     1302.181380673890         2.098510859034961    
       16.37800000     1310.210920295688         2.107064766908677    
       16.38180000     1320.646527833875         2.121404628516736    
       16.38560000     1329.428256335475         2.135692426787831    
       16.38940000     1332.676256077268         2.127963948662508    
       16.39320000     1341.117964951346         2.134477314452223    
       16.39700000     1348.022890549892         2.155328047779494    
       16.40080000     1352.525239644408         2.157218059224007    
       16.40460000     1359.082217216251         2.162841440347806    
       16.40840000     1364.134469438788         2.181384495628024    
       16.41220000     1365.351712378273         2.184654198774516    
       16.41600000     1370.053623851588         2.198177423732991    
       16.41980000     1374.426039727435         2.198387679099442    
       16.42360000     1378.131411519656         2.196707334096780    
       16.42740000     1381.321976180214         2.196890650054995    
       16.43120000     1385.561290030567         2.207853427309718    
       16.43500000     1387.022541451549         2.212619588495504    
       16.43880000     1390.364907399070         2.222709984015148    
       16.44260000     1392.862661649619         2.216270790744102    
       16.44640000     1396.034119798730         2.212524561152939    
       16.45020000     1397.029520187288         2.224178586293314    
       16.45400000     1395.851583945789         2.228597619990471    
       16.45780000     1397.842453862491         2.235128322064851    
       16.46160000     1399.305992024220         2.227642514748846    
       16.46540000     1402.087643046345         2.232446935355202    
       16.46920000     1404.476266103567         2.234843929346483    
       16.47300000     1403.899740355632         2.235481368637704    
       16.47680000     1402.391027679208         2.232920028663583    
       16.48060000     1399.953464151447         2.232063291868800    
       16.48440000     1399.189979952966         2.241295620229186    
       16.48820000     1398.309879243530         2.251947002466072    
       16.49200000     1397.012959962953         2.230431360071338    
       16.49580000     1395.242119924050         2.223700747955027    
       16.49960000     1388.372881092752         2.215741449710163    
       16.50340000     1383.711053574212         2.208651893300236    
       16.50720000     1378.044853139666         2.195326745548563    
       16.51100000     1375.765509707157         2.193683608038111    
       16.51480000     1367.687365077415         2.185456847533825    
       16.51860000     1364.092878415778         2.190173267475786    
       16.52240000     1358.406427391217         2.181734943581630    
       16.52620000     1352.495448044741         2.159942594975524    
       16.53000000     1345.927400742564         2.153470883721738    
       16.53380000     1339.600086539780         2.153506783253633    
       16.53760000     1330.526669517096         2.134672957320848    
       16.54140000     1328.285301125929         2.134725950107762    
       16.54520000     1320.228361811558         2.117850299166980    
       16.54900000     1314.594818551710         2.120980009703744    
       16.55280000     1310.415596025795         2.108086193017031    
       16.55660000     1304.431242092405         2.103106684042299    
       16.56040000     1301.370075462635         2.100003937914338    
       16.56420000     1298.228752572272         2.103841085248250    
       16.56800000     1292.050054450759         2.093134659166572    
       16.57180000     1289.850963131032         2.091217325003969    
       16.57560000     1285.159662245139         2.082045153366324    
       16.57940000     1285.965608377541         2.081796518500914    
       16.58320000     1282.358378828086         2.077353584226182    
       16.58700000     1280.575019709160         2.078299750189322    
       16.59080000     1276.725962030884         2.056149663835510    
       16.59460000     1277.533530223892         2.081529408766576    
       16.59840000     1276.598330587787         2.077196456314312    
       16.60220000     1275.001174346154         2.074720281729189    
       16.60600000     1274.989010918469         2.076841559913438    
       16.60980000     1275.718926393746         2.060546184818069    
       16.61360000     1272.010283513669         2.048663014486853    
       16.61740000     1271.329925200369         2.063444101450434    
       16.62120000     1268.756561647459         2.060909473214975    
       16.62500000     1270.773826904016         2.070872798636482    
       16.62880000     1269.520066035029         2.054707977512151    
       16.63260000     1268.703561640666         2.065030559110882    
       16.63640000     1262.701153577985         2.054985208411593    
       16.64020000     1263.756903853991         2.052063604543298    
       16.64400000     1261.961557234501         2.045469942228055    
       16.64780000     1261.351208102214         2.048663447690098    
       16.65160000     1257.147374226206         2.046189231228206    
       16.65540000     1256.068546187553         2.039875949771218    
       16.65920000     1249.696832729530         2.028400682159509    
       16.66300000     1247.999899736798         2.019740926711966    
       16.66680000     1243.245075564679         2.028217582649574    
       16.67060000     1239.178486612466         2.009453564365840    
       16.67440000     1234.251977434665         2.000954657203085    
       16.67820000     1232.314079911486         2.017475889690103    
       16.68200000     1227.937109668928         2.009137734126066    
       16.68580000     1225.654131273054         2.004898214258824    
       16.68960000     1219.911515571369         1.979739330348411    
       16.69340000     1215.271444759326         1.979301994721321    
       16.69720000     1213.649957858355         1.983296052312904    
       16.70100000     1209.735347767272         1.973914221654768    
       16.70480000     1205.304298852559         1.977856894893699    
       16.70860000     1203.122668662301         1.963492402176138    
       16.71240000     1198.775875309969         1.965972639082862    
       16.71620000     1198.352620692818         1.974402402096977    
       16.72000000     1194.389050821005         1.971776693091453    
       16.72380000     1192.321889737013         1.961924675982121    
       16.72760000     1189.239049251234         1.945999743133348    
       16.73140000     1187.897048982819         1.952816149471641    
       16.73520000     1188.551198910503         1.959848084756157    
       16.73900000     1188.094022271459         1.952874311880157    
       16.74280000     1185.480561372033         1.943887373441441    
       16.74660000     1187.248246902352         1.945321748290523    
       16.75040000     1186.864241099984         1.946927779214426    
       16.75420000     1186.316212563873         1.962029418770920    
       16.75800000     1186.116777235246         1.966387844541493    
       16.76180000     1185.001794425105         1.955144092277344    
       16.76560000     1187.108105047663         1.950336356039836    
       16.76940000     1189.598881680423         1.955718372395991    
       16.77320000     1189.059071189232         1.963582355508005    
       16.77700000     1189.882072005856         1.964002293359431    
       16.78080000     1193.226291547979         1.972997327300354    
       16.78460000     1194.354620455312         1.966936572486597    
       16.78840000     1197.953245289536         1.977282512547087    
       16.79220000     1198.639961873910         1.977037317254952    
       16.79600000     1202.159476045661         1.973874135772032    
       16.79980000     1205.130224601031         1.985448204105132    
       16.80360000     1206.762764213852         1.979531347377073    
       16.80740000     1207.501721093567         1.977703976161575    
       16.81120000     1209.301121169469         1.983077709089137    
       16.81500000     1210.541075412117         1.975904942846988    
       16.81880000     1210.045244145492         1.985340898143510    
       16.82260000     1212.016541188868         1.991304940712827    
       16.82640000     1214.630371401686         1.987649416670325    
       16.83020000     1216.090666057321         1.998969942189132    
       16.83400000     1215.840187478000         1.994367478192419    
       16.83780000     1212.507028142745         1.976852578981118    
       16.84160000     1211.895436677572         1.978701975730627    
       16.84540000     1210.393341652867         1.982336575766670    
       16.84920000     1209.753840369739         1.983116136448713    
       16.85300000     1208.789874201792         1.978792841343890    
       16.85680000     1207.497689705376         1.978999393459156    
       16.86060000     1204.950751632647         1.976216448861456    
       16.86440000     1204.688733619624         1.982889787319060    
       16.86820000     1202.693044608706         1.972153895426600    
       16.87200000     1198.679154477308         1.970172725896549    
       16.87580000     1193.964660132224         1.962494138241301    
       16.87960000     1193.298297091547         1.972453077802541    
       16.88340000     1191.633411378475         1.960200137230447    
       16.88720000     1189.560965293311         1.952801241405627    
       16.89100000     1184.719706475277         1.938253819184162    
       16.89480000     1185.350647982288         1.959121813743496    
       16.89860000     1181.734664339741         1.949205593635930    
       16.90240000     1175.896464642919         1.955185588378171    
       16.90620000     1174.682316718428         1.940193522086578    
       16.91000000     1171.098052208841         1.927645708112778    
       16.91380000     1167.983367584390         1.919776242701661    
       16.91760000     1163.042310322314         1.923565999836710    
       16.92140000     1162.632813229212         1.923366554390553    
       16.92520000     1162.139248156381         1.924132610714674    
       16.92900000     1156.272561369511         1.916486949525246    
       16.93280000     1154.762754662691         1.920808677095929    
       16.93660000     1153.128356981031         1.923987308361525    
       16.94040000     1150.802603624111         1.906591489538549    
       16.94420000     1151.491286677723         1.904859089403919    
       16.94800000     1146.760859603281         1.900851471701559    
       16.95180000     1144.106367547873         1.913909850803126    
       16.95560000     1145.745133461870         1.901308600706145    
       16.95940000     1142.094909555109         1.893212751037050    
       16.96320000     1141.011574114064         1.895657296181853    
       16.96700000     1140.440189283873         1.901038910452274    
       16.97080000     1138.116430264489         1.892011628094304    
       16.97460000     1138.925418389586         1.890475365809886    
       16.97840000     1136.402480732914         1.889744757053653    
       16.98220000     1137.115028944365         1.901960904850694    
       16.98600000     1140.197550108966         1.909643383984210    
       16.98980000     1137.573362891534         1.897217595666832    
       16.99360000     1139.087880341174         1.894035914296616    
       16.99740000     1136.385212625301         1.894552949197223    
       17.00120000     1139.659781652376         1.885040608649491    
       17.00500000     1137.284676977839         1.889209513656892    
       17.00880000     1135.510120759121         1.881969134387615    
       17.01260000     1136.491946800817         1.896536846738776    
       17.01640000     1134.831710745779         1.891142490037991    
       17.02020000     1131.541530118126         1.891976222708333    
       17.02400000     1134.068575997312         1.889164263370171    
       17.02780000     1133.917119965218         1.890318451355139    
       17.03160000     1133.492655424862         1.882619946726073    
       17.03540000     1133.180275766121         1.895213272334649    
       17.03920000     1130.264774874880         1.881712640066572    
       17.04300000     1131.383339535469         1.882193551054121    
       17.04680000     1132.284397491732         1.883311840726424    
       17.05060000     1131.113877824954         1.877010983566189    
       17.05440000     1130.469602746218         1.891330822888210    
       17.05820000     1128.987215998295         1.893451642892985    
       17.06200000     1132.521498179781         1.904971325241127    
       17.06580000     1131.059114348106         1.889392980843951    
       17.06960000     1131.356419329604         1.886962548358001    
       17.07340000     1130.795096581637         1.890470296378770    
       17.07720000     1132.516553187826         1.891357166022871    
       17.08100000     1131.428487529703         1.890944022508128    
       17.08480000     1131.985183992169         1.894830514014313    
       17.08860000     1132.297208236272         1.896166380596688    
       17.09240000     1131.376071714473         1.902467330744307    
       17.09620000     1132.978850384098         1.898817455901214    
       17.10000000     1134.112975635192         1.883841372729329    
       17.10380000     1134.243604384600         1.885136832999875    
       17.10760000     1136.228153334347         1.888734364841062    
       17.11140000     1134.561859428011         1.885286307497390    
       17.11520000     1135.565052863469         1.881424846603035    
       17.11900000     1137.246808238121         1.888861510207054    
       17.12280000     1138.326008917054         1.891635441082938    
       17.12660000     1139.174016747596         1.897033830169995    
       17.13040000     1138.195051091201         1.899727784960924    
       17.13420000     1140.701009022144         1.897415925572567    
       17.13800000     1139.606054974375         1.889705242348081    
       17.14180000     1137.836748775280         1.884778129400031    
       17.14560000     1140.283661836709         1.891709303444825    
       17.14940000     1141.578911026784         1.903785134330274    
       17.15320000     1141.403822737338         1.896805433193008    
       17.15700000     1141.000767412516         1.901847296769478    
       17.16080000     1143.610963991047         1.909031050784314    
       17.16460000     1146.831584854828         1.910549561443645    
       17.16840000     1147.743384160210         1.914581291294512    
       17.17220000     1146.511211889216         1.911411629021002    
       17.17600000     1147.646310715576         1.904359623201471    
       17.17980000     1146.641207547158         1.908191800935187    
       17.18360000     1146.598629568436         1.907903776364778    
       17.18740000     1148.294795851755         1.906909757191885    
       17.19120000     1151.305450768574         1.897400315544174    
       17.19500000     1153.226833967858         1.900839460453947    
       17.19880000     1154.968300493580         1.911228296084209    
       17.20260000     1154.699338772934         1.913946567036958    
       17.20640000     1156.438009088614         1.921752411991511    
       17.21020000     1160.880369604527         1.921467296850455    
       17.21400000     1163.110223952017         1.909436282928810    
       17.21780000     1164.359217347670         1.912235658546531    
       17.22160000     1163.465255437889         1.931117245940865    
       17.22540000     1171.802923701345         1.946139513249361    
       17.22920000     1171.410987152008         1.940918918265879    
       17.23300000     1176.701221931994         1.953443910075601    
       17.23680000     1178.933642468433         1.957949114990352    
       17.24060000     1184.292699815951         1.948943163276710    
       17.24440000     1185.984033515310         1.953630093833606    
       17.24820000     1189.874193665931         1.967421874156293    
       17.25200000     1190.553284266490         1.964869134516003    
       17.25580000     1197.374498224073         1.974540616843558    
       17.25960000     1202.611948091227         1.972801009364115    
       17.26340000     1206.061290256647         1.982823084401725    
       17.26720000     1209.785017111267         1.995815040108523    
       17.27100000     1213.760841609176         2.000985465143828    
       17.27480000     1214.923986167850         1.996877527712980    
       17.27860000     1218.681024720391         2.002920746960300    
       17.28240000     1223.858922699158         2.015111317580683    
       17.28620000     1227.784447847883         2.028130464903021    
       17.29000000     1235.105376739605         2.038235025452203    
       17.29380000     1233.662176143854         2.029053949922700    
       17.29760000     1236.729737270516         2.023768760323976    
       17.30140000     1241.881732730195         2.025863601532975    
       17.30520000     1244.272309813824         2.031416689192032    
       17.30900000     1242.993492549597         2.031979646919498    
       17.31280000     1244.820897669763         2.033262313221149    
       17.31660000     1246.915940040209         2.040029939462429    
       17.32040000     1245.476139231822         2.040173068076807    
       17.32420000     1245.849445135442         2.028494412594227    
       17.32800000     1248.775977693987         2.030392811730877    
       17.33180000     1244.376864434492         2.021775169948302    
       17.33560000     1244.649986970901         2.054065958217433    
       17.33940000     1243.791061068213         2.034902973773257    
       17.34320000     1245.367768170380         2.039855502385095    
       17.34700000     1243.088270997188         2.018788719499478    
       17.35080000     1242.068718124489         2.022266249877832    
       17.35460000     1245.153046407666         2.045954018635320    
       17.35840000     1240.466639467737         2.037996283381865    
       17.36220000     1243.993139795478         2.048330196117009    
       17.36600000     1238.228789651233         2.045817313613285    
       17.36980000     1241.577831328178         2.035996024596291    
       17.37360000     1238.931576035457         2.027268546331559    
       17.37740000     1239.594720081388         2.031843537874910    
       17.38120000     1238.495458346230         2.037517375936253    
       17.38500000     1241.108362447393         2.035141503688687    
       17.38880000     1241.429418519108         2.037907575842852    
       17.39260000     1239.469027367624         2.029033432623497    
       17.39640000     1237.570819196403         2.031288168882454    
       17.40020000     1238.745727533450         2.029854134095157    
       17.40400000     1237.736375012436         2.025067512104664    
       17.40780000     1236.024258403874         2.017922538533575    
       17.41160000     1235.364216163723         2.019885220309675    
       17.41540000     1232.077572768197         2.007527696958467    
       17.41920000     1232.605232604321         2.001631289543998    
       17.42300000     1229.105448559890         2.008911660509404    
       17.42680000     1230.691074530461         2.027555795553519    
       17.43060000     1226.989137326918         2.015505070453036    
       17.43440000     1223.677051851107         2.012447077742831    
       17.43820000     1218.998075758058         1.997743503700384    
       17.44200000     1214.784192071459         1.985126858734386    
       17.44580000     1214.182688169256         2.002984388453018    
       17.44960000     1209.038837680812         1.992357341156454    
       17.45340000     1205.894614162394         1.982866585775891    
       17.45720000     1203.006525231520         1.981668681437419    
       17.46100000     1199.433767829533         1.987527601820591    
       17.46480000     1195.789734770675         1.987366504246540    
       17.46860000     1193.366529639208         1.972785503512048    
       17.47240000     1189.258376195289         1.963698194907931    
       17.47620000     1185.080277093206         1.961106378921305    
       17.48000000     1183.897874230221         1.958414447416847    
       17.48380000     1183.592419510384         1.956545437206500    
       17.48760000     1180.678468036852         1.948436022805869    
       17.49140000     1176.907671983457         1.935261706709855    
       17.49520000     1176.243158358187         1.939243497502800    
       17.49900000     1173.829124166886         1.931457004338024    
       17.50280000     1173.153132738343         1.946717450895244    
       17.50660000     1169.252372496350         1.945997790802646    
       17.51040000     1167.037722433681         1.932028081758310    
       17.51420000     1166.641065714946         1.915874266913214    
       17.51800000     1163.311999607674         1.915717115763691    
       17.52180000     1162.902773676138         1.924247771707066    
       17.52560000     1162.847453205603         1.931666571380420    
       17.52940000     1159.974403581554         1.927496868116991    
       17.53320000     1160.440405177795         1.936251118418065    
       17.53700000     1157.062293053798         1.930865490223268    
       17.54080000     1157.313754306512         1.924433544690629    
       17.54460000     1155.584702105457         1.911550392618958    
       17.54840000     1155.611348175810         1.908773511887217    
       17.55220000     1156.769159928677         1.923140913854651    
       17.55600000     1157.339707008464         1.927835180804304    
       17.55980000     1158.516771901140         1.927772708619650    
       17.56360000     1159.975885455490         1.927053954106031    
       17.56740000     1160.688682482213         1.936756237854705    
       17.57120000     1162.013677875826         1.936936692881098    
       17.57500000     1163.689500207327         1.938064925839450    
       17.57880000     1164.556231737361         1.935283466991931    
       17.58260000     1165.269484805657         1.940759801365488    
       17.58640000     1169.946758429975         1.957516914315082    
       17.59020000     1170.718318690821         1.951664890483295    
       17.59400000     1171.141565654105         1.950684086436926    
       17.59780000     1171.307684039850         1.945513026570334    
       17.60160000     1175.156290048001         1.950709287004583    
       17.60540000     1178.470676582366         1.948650825046332    
       17.60920000     1179.043248385286         1.948981491286190    
       17.61300000     1177.431699711717         1.954729726013157    
       17.61680000     1177.487684709310         1.951445327275273    
       17.62060000     1177.012945804034         1.952370082999493    
       17.62440000     1178.153271039934         1.946237904371279    
       17.62820000     1173.732354314957         1.935223266484484    
       17.63200000     1171.712419023919         1.941322274819791    
       17.63580000     1168.524089563628         1.941298700975990    
       17.63960000     1170.548816369607         1.943965612537628    
       17.64340000     1168.837514631441         1.936505164695066    
       17.64720000     1166.229537735981         1.929232670041406    
       17.65100000     1160.101379653312         1.921488963830744    
       17.65480000     1160.107404292245         1.932149059779121    
       17.65860000     1156.458645456399         1.922806583387450    
       17.66240000     1152.625421864505         1.918286983897582    
       17.66620000     1147.529169760933         1.919020744820031    
       17.67000000     1143.793146489431         1.905225605409066    
       17.67380000     1139.416638602095         1.904184288505835    
       17.67760000     1136.338009684292         1.895404406305189    
       17.68140000     1131.731061167336         1.893643656189144    
       17.68520000     1129.218871952425         1.877731071372390    
       17.68900000     1126.875802283826         1.878249578737298    
       17.69280000     1122.072515210693         1.873466657756374    
       17.69660000     1118.419207813881         1.874659853769786    
       17.70040000     1115.835704827067         1.868418919697253    
       17.70420000     1114.271491677327         1.856573694755463    
       17.70800000     1113.314266232097         1.855772120452687    
       17.71180000     1109.430095475246         1.842924675413484    
       17.71560000     1103.732761512207         1.848882455254444    
       17.71940000     1101.977667420278         1.839890434722912    
       17.72320000     1100.253300989512         1.842808571196425    
       17.72700000     1098.327230592964         1.840737263287874    
       17.73080000     1097.554201019671         1.849499733666908    
       17.73460000     1091.387319199553         1.838696382047730    
       17.73840000     1089.891600350807         1.837128710659097    
       17.74220000     1086.519090243065         1.820877713076962    
       17.74600000     1085.373935310527         1.823112052681870    
       17.74980000     1084.101202240550         1.824884631825945    
       17.75360000     1083.745296144531         1.825772916766375    
       17.75740000     1080.976022778209         1.825174047252764    
       17.76120000     1079.075343004663         1.829974778031899    
       17.76500000     1076.188208792231         1.818506250901857    
       17.76880000     1076.842441338108         1.819991800414158    
       17.77260000     1075.995397781119         1.825458693443539    
       17.77640000     1073.469069045898         1.811939442629103    
       17.78020000     1073.314806437731         1.814402678477084    
       17.78400000     1070.417941663773         1.812763354175026    
       17.78780000     1070.850182552917         1.802463514841275    
       17.79160000     1068.259915196330         1.801890944579607    
       17.79540000     1069.163899853663         1.803996125935870    
       17.79920000     1067.202202450399         1.793864240986430    
       17.80300000     1067.633867254337         1.800439721164517    
       17.80680000     1069.329531397164         1.806051566110563    
       17.81060000     1067.932391120740         1.809508526164947    
       17.81440000     1071.081953525382         1.804525390688851    
       17.81820000     1071.902961110396         1.798061708876949    
       17.82200000     1071.499703074013         1.805749511262307    
       17.82580000     1074.138392094051         1.811775189750169    
       17.82960000     1074.067673224466         1.816202626145534    
       17.83340000     1072.552958343316         1.810535522009157    
       17.83720000     1074.626111335091         1.813517610255108    
       17.84100000     1076.866248836173         1.806957061769648    
       17.84480000     1076.158001616380         1.806321708622472    
       17.84860000     1077.809073876125         1.810684127025750    
       17.85240000     1077.911931119748         1.817296153265491    
       17.85620000     1079.512274016623         1.822931053332197    
       17.86000000     1081.665262006485         1.824678977363564    
       17.86380000     1082.693412387847         1.833535668301508    
       17.86760000     1082.387623835008         1.834652808332522    
       17.87140000     1084.107191490778         1.838249492634266    
       17.87520000     1083.881219081767         1.839027177703741    
       17.87900000     1084.794891312417         1.837360123721426    
       17.88280000     1086.184022957820         1.844411970309039    
       17.88660000     1086.903301997277         1.842567869831721    
       17.89040000     1085.609598430656         1.840593602131719    
       17.89420000     1086.107442910944         1.838197344738020    
       17.89800000     1085.563413212441         1.832858713605173    
       17.90180000     1087.647087760131         1.826932915036197    
       17.90560000     1086.855816239389         1.835294240739627    
       17.90940000     1087.072006270882         1.833393456718737    
       17.91320000     1085.614674653712         1.828540628824746    
       17.91700000     1085.919600573481         1.829795029625032    
       17.92080000     1085.364851242661         1.836380882798586    
       17.92460000     1081.581527336602         1.827692407200548    
       17.92840000     1084.723949973742         1.825661047581466    
       17.93220000     1081.345881393000         1.815262972660887    
       17.93600000     1076.367875920880         1.814918171701528    
       17.93980000     1077.522880637573         1.823652682709849    
       17.94360000     1078.125769182842         1.828266038161144    
       17.94740000     1076.064846175460         1.828291533521095    
       17.95120000     1073.033793510503         1.805158778068953    
       17.95500000     1073.906770430616         1.817275654550086    
       17.95880000     1070.984622065415         1.814841553743338    
       17.96260000     1071.779001448974         1.815442590619013    
       17.96640000     1068.843676290763         1.809040517095885    
       17.97020000     1071.132618411473         1.817899043856768    
       17.97400000     1071.347832385678         1.818874492163696    
       17.97780000     1070.124491205441         1.811361295498606    
       17.98160000     1068.434006764277         1.813701091464245    
       17.98540000     1067.530194307003         1.807470059649429    
       17.98920000     1070.443025169932         1.811492955068080    
       17.99300000     1072.393657724808         1.812666678172455    
       17.99680000     1071.168272815833         1.800809152333386    
       18.00060000     1074.722597682478         1.804866756100818    
       18.00440000     1077.611656367933         1.806115665126248    
       18.00820000     1080.621150771465         1.816403335260960    
       18.01200000     1079.371728665388         1.819493342668517    
       18.01580000     1083.905585795861         1.821668772517667    
       18.01960000     1087.299814040585         1.828103152308691    
       18.02340000     1089.377382639860         1.821579150945884    
       18.02720000     1092.459219312311         1.828749196342404    
       18.03100000     1096.303730690631         1.850428700607943    
       18.03480000     1095.694619546522         1.846382541912960    
       18.03860000     1101.452775295761         1.854072670087366    
       18.04240000     1099.945698678083         1.841101434183446    
       18.04620000     1103.802392713792         1.852082161699667    
       18.05000000     1105.831755801265         1.859754349884842    
       18.05380000     1108.163455202446         1.860217243290229    
       18.05760000     1109.534667808894         1.871119382953234    
       18.06140000     1108.917451820528         1.867805510563733    
       18.06520000     1109.292117425014         1.874803967351762    
       18.06900000     1109.478075137424         1.868503919251528    
       18.07280000     1106.501200533487         1.864289672288152    
       18.07660000     1106.432937662164         1.860315895697880    
       18.08040000     1103.790274914064         1.859737261364868    
       18.08420000     1100.182059993053         1.850533124546108    
       18.08800000     1095.837231687220         1.838046454805774    
       18.09180000     1094.110588667795         1.837756204147664    
       18.09560000     1089.518123815315         1.833909764804775    
       18.09940000     1085.020654310357         1.830811968377353    
       18.10320000     1079.066134328600         1.813148898959137    
       18.10700000     1079.733423240560         1.820623022027916    
       18.11080000     1077.030609610733         1.819962349388395    
       18.11460000     1072.403427257933         1.808725114075580    
       18.11840000     1068.697037503436         1.797285341916115    
       18.12220000     1068.816307581787         1.806421450927185    
       18.12600000     1065.001813607816         1.800057482228880    
       18.12980000     1062.295631957156         1.801759807127216    
       18.13360000     1058.011472375015         1.789044854823179    
       18.13740000     1057.431898272289         1.783243217618485    
       18.14120000     1057.743833812845         1.780018563189686    
       18.14500000     1054.635440445932         1.781426142287109    
       18.14880000     1051.088893461239         1.782564875007315    
       18.15260000     1050.090679766650         1.781624516838210    
       18.15640000     1048.386840673426         1.782994832928156    
       18.16020000     1047.315823460486         1.778310471051109    
       18.16400000     1044.675579236396         1.774415069042408    
       18.16780000     1044.501995489451         1.783542987274714    
       18.17160000     1043.489896963612         1.776905865730880    
       18.17540000     1041.261515019238         1.771632338920164    
       18.17920000     1037.231918759507         1.766837505099948    
       18.18300000     1036.003548745059         1.768174540172907    
       18.18680000     1036.041639243701         1.772393492086598    
       18.19060000     1034.172973315332         1.776001986614609    
       18.19440000     1031.327164114694         1.761004894945247    
       18.19820000     1027.556517259348         1.741722012898744    
       18.20200000     1027.334090936716         1.754445264940885    
       18.20580000     1025.997217792149         1.752759406576512    
       18.20960000     1024.736278162771         1.747009309339363    
       18.21340000     1023.372657696449         1.745942537080221    
       18.21720000     1021.280741957110         1.746017599788800    
       18.22100000     1018.241979707145         1.748751141129349    
       18.22480000     1017.142468718312         1.736253860725726    
       18.22860000     1017.716378073896         1.730363720882345    
       18.23240000     1014.836823013927         1.728047360773096    
       18.23620000     1012.186119791614         1.730206126459576    
       18.24000000     1011.664655877576         1.733909374887896    
       18.24380000     1013.898216452923         1.741245483259919    
       18.24760000     1011.392305258535         1.733682219981913    
       18.25140000     1007.868705898796         1.728346758027041    
       18.25520000     1006.014668425025         1.725001468667985    
       18.25900000     1004.832058427673         1.721724205010151    
       18.26280000     1003.514480534705         1.717581794020394    
       18.26660000     1001.037389600422         1.714379824281780    
       18.27040000     1002.696984902271         1.719392545602959    
       18.27420000     999.9876829169605         1.725604052869346    
       18.27800000     998.9597069766905         1.717752489744678    
       18.28180000     998.3913709383243         1.715865949353993    
       18.28560000     995.2522647690283         1.715060298176108    
       18.28940000     996.0801870578148         1.708338602169198    
       18.29320000     995.2826232393182         1.703631299764360    
       18.29700000     995.0056543996880         1.699850077427183    
       18.30080000     995.1598171222698         1.692703857648993    
       18.30460000     995.9435416886480         1.702365537534467    
       18.30840000     993.0322836717683         1.697847287307503    
       18.31220000     992.2599280529627         1.700648531144927    
       18.31600000     992.4483908697246         1.697158902129302    
       18.31980000     991.5982869547684         1.704546950779116    
       18.32360000     992.2925976715651         1.701751480267263    
       18.32740000     991.1635764024035         1.703804440126618    
       18.33120000     988.4489427167410         1.700115875117016    
       18.33500000     989.1945640422392         1.705426430182619    
       18.33880000     990.0753047087209         1.704672890445962    
       18.34260000     988.6833489555164         1.700279853592189    
       18.34640000     988.7897810878230         1.705549458395176    
       18.35020000     986.8621245969696         1.694234416091233    
       18.35400000     989.6894602366415         1.702827546130328    
       18.35780000     987.1237630094977         1.700463918025128    
       18.36160000     984.7461104560956         1.696639423191117    
       18.36540000     986.7140471803633         1.701350793256341    
       18.36920000     986.5884050211672         1.699559472800075    
       18.37300000     987.6906418538344         1.708614643039901    
       18.37680000     987.5847173718953         1.702184789147505    
       18.38060000     985.8292357511338         1.698874321887836    
       18.38440000     988.1247901857334         1.708869943629424    
       18.38820000     989.5246876260480         1.695677080053986    
       18.39200000     988.8129938472953         1.701944349082756    
       18.39580000     987.8506344912980         1.704865296293343    
       18.39960000     987.3881066141918         1.705776176426539    
       18.40340000     990.0261158442995         1.703299970346842    
       18.40720000     992.2486999565649         1.710558801450434    
       18.41100000     993.2430071141559         1.709827314574068    
       18.41480000     995.5411483243622         1.712843612821559    
       18.41860000     996.5877021686417         1.704901154416502    
       18.42240000     1000.877224251738         1.715463958970365    
       18.42620000     1002.201733722128         1.720305401804376    
       18.43000000     1002.738853245311         1.729907183910956    
       18.43380000     1004.277005620355         1.723961617772462    
       18.43760000     1005.777035841120         1.707800327771432    
       18.44140000     1010.647153228926         1.728202603497120    
       18.44520000     1013.097207397705         1.728102122087171    
       18.44900000     1015.408425536522         1.730465565782218    
       18.45280000     1019.778997909453         1.739323008210170    
       18.45660000     1023.287648638499         1.746833711301589    
       18.46040000     1027.963933147946         1.755610242334333    
       18.46420000     1030.416600024319         1.758536438311952    
       18.46800000     1035.040940852437         1.773037765239457    
       18.47180000     1038.988274591847         1.769537055475005    
       18.47560000     1041.834853328826         1.769306497427371    
       18.47940000     1043.811608162221         1.772809412318635    
       18.48320000     1046.573452946353         1.793002786053659    
       18.48700000     1053.953858022698         1.799281089300863    
       18.49080000     1056.478185025413         1.794528749642312    
       18.49460000     1060.449952397558         1.790859105792015    
       18.49840000     1066.380813280104         1.802992747737676    
       18.50220000     1067.128252231227         1.802607657285993    
       18.50600000     1070.235825514302         1.805497671092018    
       18.50980000     1073.852092907372         1.813698124269675    
       18.51360000     1078.451943671785         1.817492709226205    
       18.51740000     1080.985761580944         1.821541963413982    
       18.52120000     1086.099094351651         1.833232757303295    
       18.52500000     1085.712967699114         1.832191609769367    
       18.52880000     1091.348490036652         1.837381977847683    
       18.53260000     1092.139426826911         1.834164590094546    
       18.53640000     1094.062005630302         1.835661332836944    
       18.54020000     1099.323433402391         1.846775034927524    
       18.54400000     1099.384412889120         1.851919623319433    
       18.54780000     1100.873416276509         1.859946733581192    
       18.55160000     1100.598931205907         1.853521731634648    
       18.55540000     1103.661279255199         1.849409558330183    
       18.55920000     1104.106136737950         1.840828933898464    
       18.56300000     1102.820125589486         1.847583246644974    
       18.56680000     1103.439023972419         1.845220863910720    
       18.57060000     1104.556334358632         1.846411170128832    
       18.57440000     1106.482945448944         1.857373911538935    
       18.57820000     1106.911499652273         1.854699874654502    
       18.58200000     1104.851237367766         1.861600256919552    
       18.58580000     1102.884771476401         1.854650270792917    
       18.58960000     1104.655333339045         1.858007784711863    
       18.59340000     1103.279835109970         1.856484943269538    
       18.59720000     1100.585650822755         1.841867185984026    
       18.60100000     1101.111398713070         1.832577246819900    
       18.60480000     1103.904975144960         1.836128232040377    
       18.60860000     1103.383597211161         1.847273656449655    
       18.61240000     1099.017312785012         1.842142603793895    
       18.61620000     1096.797922873869         1.841342384483451    
       18.62000000     1095.779950290649         1.839691964704038    
       18.62380000     1092.340337560531         1.842029911538480    
       18.62760000     1090.939892672434         1.829653612658286    
       18.63140000     1087.991363104670         1.831993917806014    
       18.63520000     1082.220659110552         1.830452524133615    
       18.63900000     1079.976520012254         1.824403381591461    
       18.64280000     1079.677730559747         1.823073291679304    
       18.64660000     1074.575899239541         1.805411478881219    
       18.65040000     1071.610293706586         1.799681002597137    
       18.65420000     1068.866309109144         1.799951288096301    
       18.65800000     1063.598995056987         1.793435693880814    
       18.66180000     1060.271181987068         1.792639053817950    
       18.66560000     1056.217167359533         1.793308014241727    
       18.66940000     1053.406662449732         1.791876925646235    
       18.67320000     1050.175466464401         1.785822238978776    
       18.67700000     1047.866307765470         1.777746462988227    
       18.68080000     1045.610715672240         1.781502089431308    
       18.68460000     1042.446241030039         1.774970495504660    
       18.68840000     1041.145291754144         1.764132767151291    
       18.69220000     1036.513583974304         1.759684651983169    
       18.69600000     1033.460675676812         1.761410315410294    
       18.69980000     1031.090998647005         1.758273639298740    
       18.70360000     1028.037601154620         1.750761361655842    
       18.70740000     1028.871578361525         1.756066119252254    
       18.71120000     1026.217894121685         1.753834413779380    
       18.71500000     1025.775066057605         1.743077020212365    
       18.71880000     1020.485413663045         1.736155136802070    
       18.72260000     1021.361613234886         1.748773478075104    
       18.72640000     1019.288874003090         1.742480021659187    
       18.73020000     1017.449737741494         1.742066970847573    
       18.73400000     1017.443969498156         1.741973644598504    
       18.73780000     1015.792491565884         1.726795373028144    
       18.74160000     1015.639817864109         1.733771902764458    
       18.74540000     1015.340893424905         1.736923307777689    
       18.74920000     1012.249338926219         1.734085138059897    
       18.75300000     1011.584039745894         1.728192277137013    
       18.75680000     1014.979116121051         1.729722320562644    
       18.76060000     1015.593323839734         1.738188461484599    
       18.76440000     1014.802557578244         1.745945134487316    
       18.76820000     1017.223198960591         1.747636247608850    
       18.77200000     1015.497144459592         1.743310647628739    
       18.77580000     1012.518689467489         1.729767178121872    
       18.77960000     1014.234023221869         1.726909960247841    
       18.78340000     1014.704369236204         1.735421705774400    
       18.78720000     1014.793967320154         1.740889976363196    
       18.79100000     1013.168929133703         1.733950101682483    
       18.79480000     1013.033283540841         1.730541830323203    
       18.79860000     1015.583259722247         1.740048330368766    
       18.80240000     1011.462810422508         1.724642235307086    
       18.80620000     1011.084401167498         1.731230451726950    
       18.81000000     1007.727482451563         1.713620300617770    
       18.81380000     1008.448700628408         1.722488834963319    
       18.81760000     1007.638441862519         1.731262195411035    
       18.82140000     1007.947990051629         1.729915635372041    
       18.82520000     1004.698420990103         1.724350345384097    
       18.82900000     1004.357881156109         1.725283022775146    
       18.83280000     1003.301211262069         1.715889456284972    
       18.83660000     998.4661387111868         1.705442131186675    
       18.84040000     995.7635478871374         1.711097231185748    
       18.84420000     995.1012478104386         1.715838200080920    
       18.84800000     994.7476832663526         1.715071281317476    
       18.85180000     992.1245812295756         1.707847419155046    
       18.85560000     991.2308024550315         1.702745304686070    
       18.85940000     990.0227137897032         1.697474538437094    
       18.86320000     987.2845697991565         1.697381180203776    
       18.86700000     985.8536657985192         1.694209595762283    
       18.87080000     983.7920597982344         1.689931382395553    
       18.87460000     983.0981391613670         1.693435844619186    
       18.87840000     982.7078300650643         1.692420013040010    
       18.88220000     980.2052349982513         1.693545712583442    
       18.88600000     978.0622791237455         1.696380384623169    
       18.88980000     976.7178455402109         1.692288126142032    
       18.89360000     975.5367754489613         1.686580035003995    
       18.89740000     975.9685708892803         1.686168022423440    
       18.90120000     976.0088252176157         1.672013439652392    
       18.90500000     974.1955313090295         1.666871358859705    
       18.90880000     972.0571418357571         1.684558624843315    
       18.91260000     972.2280565552969         1.689301017408834    
       18.91640000     974.0301930707027         1.675789986774970    
       18.92020000     974.2632433111711         1.677444036680976    
       18.92400000     974.0022290720304         1.676856582697837    
       18.92780000     973.2733137416894         1.677279537183038    
       18.93160000     974.3577720276642         1.687989965700051    
       18.93540000     974.0764389985254         1.687953407208840    
       18.93920000     975.5172784283653         1.688754000794973    
       18.94300000     977.7196791981362         1.684521061209857    
       18.94680000     980.3524093673652         1.688097483915949    
       18.95060000     981.3861980640762         1.685925184963695    
       18.95440000     980.7542011616289         1.685882436871709    
       18.95820000     982.3302220739880         1.694341120685702    
       18.96200000     984.6853331623774         1.690349653235963    
       18.96580000     988.4382448603943         1.700406649357532    
       18.96960000     990.7585775364905         1.703476361549592    
       18.97340000     995.4948027701256         1.715534896160364    
       18.97720000     999.3803778451451         1.717713905135575    
       18.98100000     998.4787746963751         1.713784034744681    
       18.98480000     1003.977541718412         1.718667115203984    
       18.98860000     1005.638044802246         1.727616371180432    
       18.99240000     1008.378138055345         1.731323585151951    
       18.99620000     1009.976786734553         1.725454839949672    
       19.00000000     1009.943801347711         1.731772398467121    
       19.00380000     1009.964673813332         1.729227855277432    
       19.00760000     1015.362403761600         1.740991605764332    
       19.01140000     1016.643724157578         1.740227431011436    
       19.01520000     1015.487026132914         1.734727940775221    
       19.01900000     1015.619682188275         1.732446408914547    
       19.02280000     1017.534781885694         1.741496369051164    
       19.02660000     1015.986401831327         1.745111501009684    
       19.03040000     1015.969447806051         1.751760546192980    
       19.03420000     1013.378394656690         1.745889624738699    
       19.03800000     1011.810030549568         1.728751355358505    
       19.04180000     1012.526870180458         1.735337503342021    
       19.04560000     1011.738490166484         1.739171370561812    
       19.04940000     1006.361074830550         1.730254986761791    
       19.05320000     1007.755157448003         1.721164785814688    
       19.05700000     1005.903622876639         1.721868719891513    
       19.06080000     1003.833952597832         1.726535627004075    
       19.06460000     1001.553249151297         1.729986540472989    
       19.06840000     1001.665198789356         1.727702724937731    
       19.07220000     998.0706768106046         1.713661140645753    
       19.07600000     993.2855179970471         1.707798064381552    
       19.07980000     990.1309103841760         1.695203670653189    
       19.08360000     989.4583279327270         1.695264648572788    
       19.08740000     985.5128580677194         1.698860056388615    
       19.09120000     983.7587885552124         1.696793762309545    
       19.09500000     981.7779860282802         1.686991599870549    
       19.09880000     977.2287185425172         1.683703728755661    
       19.10260000     972.6371555362765         1.685545727540585    
       19.10640000     970.7164931005665         1.668659694796912    
       19.11020000     968.4266997653530         1.666664148207505    
       19.11400000     965.6660151709316         1.670139704269806    
       19.11780000     960.2206847541216         1.672109879990737    
       19.12160000     959.5688521751248         1.663034751369872    
       19.12540000     958.9369114336658         1.661720799310848    
       19.12920000     956.1833178242279         1.651500923942850    
       19.13300000     953.6598035481604         1.651381066744228    
       19.13680000     953.2469387043900         1.648391642611840    
       19.14060000     951.8784016200235         1.641845958298703    
       19.14440000     950.5103512613445         1.653057182969399    
       19.14820000     947.9508326809837         1.646975413141391    
       19.15200000     947.9490307529762         1.647014220619519    
       19.15580000     945.8042911773641         1.642977872294153    
       19.15960000     947.2430680663235         1.639160600358420    
       19.16340000     946.2603086046857         1.634338446413727    
       19.16720000     942.5107714637513         1.632710004920494    
       19.17100000     941.0055146314478         1.636355128911612    
       19.17480000     942.6729793530477         1.636005054916240    
       19.17860000     941.3892401712927         1.629444195467180    
       19.18240000     942.3069625715939         1.631723352762210    
       19.18620000     940.8883546103286         1.641458675864046    
       19.19000000     939.4345877436534         1.638105592878516    
       19.19380000     939.7821825183332         1.636560564690285    
       19.19760000     938.6363265275891         1.634925669133113    
       19.20140000     938.7857737033000         1.628281715407772    
       19.20520000     936.7676214149780         1.623995939157731    
       19.20900000     936.6346916499821         1.631883198565097    
       19.21280000     935.4108712279991         1.632862801987291    
       19.21660000     935.1256040230196         1.626507626448802    
       19.22040000     935.7678194497971         1.623684726680866    
       19.22420000     932.1845118950392         1.620677052926653    
       19.22800000     930.7792774745380         1.623072600070991    
       19.23180000     930.6260544722862         1.625700316822148    
       19.23560000     929.9556244539278         1.622495757702715    
       19.23940000     928.2164100749043         1.615209491612860    
       19.24320000     928.4143105050626         1.616475802705446    
       19.24700000     927.2121429382119         1.619304146947088    
       19.25080000     925.7314913155340         1.610066972115834    
       19.25460000     926.4928749687487         1.608571370669978    
       19.25840000     923.0049602424789         1.605028085587678    
       19.26220000     923.4345568351769         1.608927583092971    
       19.26600000     921.5087256370063         1.602662892369681    
       19.26980000     921.5393447377483         1.611413740249801    
       19.27360000     921.7051368602267         1.615500899430339    
       19.27740000     920.7767220454889         1.601867333790749    
       19.28120000     919.3050091963102         1.601067048642266    
       19.28500000     920.0045276773518         1.606805627060745    
       19.28880000     919.2332587297745         1.600721759031979    
       19.29260000     920.5909729377104         1.603754951463570    
       19.29640000     920.5504625923569         1.606574508751488    
       19.30020000     920.2268164476484         1.613422825426432    
       19.30400000     918.4743231393261         1.603799070228384    
       19.30780000     919.6782910748761         1.609244071291540    
       19.31160000     919.4697467000220         1.610230088878427    
       19.31540000     918.2833146730483         1.599962419902820    
       19.31920000     918.9494066204579         1.601941804445512    
       19.32300000     921.5612588025327         1.611811489976908    
       19.32680000     921.8608433634055         1.619737618350525    
       19.33060000     922.3762988689364         1.622750937544874    
       19.33440000     921.5597123907089         1.619306606056850    
       19.33820000     924.0062420338352         1.608070043688634    
       19.34200000     925.3309936139678         1.617075960801097    
       19.34580000     926.1989274636549         1.621462882660530    
       19.34960000     925.5569438781457         1.619261289499672    
       19.35340000     925.6955617674611         1.618756765003069    
       19.35720000     928.1791673028998         1.621502833318109    
       19.36100000     929.1796663263667         1.625039196060849    
       19.36480000     929.6578867217314         1.629688854969860    
       19.36860000     932.7485993798934         1.639538226222477    
       19.37240000     935.3418067851500         1.626354618036189    
       19.37620000     934.3895741291383         1.633367391051366    
       19.38000000     934.1419055607860         1.632495235403002    
       19.38380000     938.1536891470245         1.627998727559298    
       19.38760000     937.8346748402331         1.631379114526615    
       19.39140000     939.7856510756257         1.630648010417525    
       19.39520000     942.9045933962773         1.630090672923548    
       19.39900000     944.5938131764555         1.642044703055150    
       19.40280000     944.5648186344758         1.650157149987685    
       19.40660000     945.8297147900765         1.635404180418347    
       19.41040000     945.2355250373394         1.641277231791143    
       19.41420000     947.7840230345229         1.638483558055202    
       19.41800000     949.9614946313463         1.653031212063247    
       19.42180000     949.8320297807038         1.650804114707222    
       19.42560000     951.5181690577815         1.648170084899586    
       19.42940000     954.4293992086147         1.644472507073403    
       19.43320000     953.0333972695056         1.645889196116609    
       19.43700000     955.5404498857732         1.643945239185052    
       19.44080000     954.3358575691527         1.645140843544062    
       19.44460000     956.2642592475542         1.654293041306675    
       19.44840000     955.8449557707318         1.654522965900998    
       19.45220000     960.3149968518271         1.661587150110071    
       19.45600000     960.9110456974043         1.659860795380263    
       19.45980000     960.5247183014989         1.657311104439809    
       19.46360000     960.8222400021791         1.658538977785319    
       19.46740000     961.5025206968952         1.662774649473749    
       19.47120000     960.2392189358451         1.652550851498063    
       19.47500000     961.4838747013868         1.648983931078556    
       19.47880000     961.4608328479551         1.654540938926255    
       19.48260000     961.9237367760101         1.656941723142772    
       19.48640000     961.0593451684416         1.664803484802969    
       19.49020000     959.9651176884230         1.659786838074654    
       19.49400000     960.0152295980871         1.667365025275042    
       19.49780000     956.5396861890347         1.655470003089387    
       19.50160000     956.0324112665835         1.656971227884305    
       19.50540000     954.2428169300676         1.650756632761149    
       19.50920000     951.2504207147209         1.647142055177497    
       19.51300000     949.3421605703418         1.648939415221223    
       19.51680000     947.5049108299477         1.645775844832687    
       19.52060000     946.9336117741718         1.638120540251262    
       19.52440000     945.4016371316444         1.633571605369676    
       19.52820000     943.0819224493742         1.632037717550492    
       19.53200000     942.2061838465044         1.634235177612611    
       19.53580000     941.4987408433076         1.634021334645243    
       19.53960000     940.3115632058075         1.635324231181071    
       19.54340000     942.8109290948610         1.630467549950633    
       19.54720000     940.2387849301050         1.635791581169971    
       19.55100000     939.8754207090884         1.633056592277703    
       19.55480000     940.9316369380151         1.627806199929380    
       19.55860000     939.3252440378618         1.627025231729219    
       19.56240000     939.0244050534750         1.627515636172264    
       19.56620000     941.1550182124209         1.633014717535608    
       19.57000000     941.7101416472037         1.634257284486196    
       19.57380000     942.5245715763050         1.635208170080380    
       19.57760000     944.9422305743805         1.637282047458247    
       19.58140000     947.2000553653402         1.636179717879223    
       19.58520000     946.4993603337758         1.631397879801259    
       19.58900000     946.7812901675544         1.637887983994435    
       19.59280000     949.4684443196724         1.644016677459397    
       19.59660000     950.9989591593409         1.645793429870153    
       19.60040000     948.6279145894409         1.643472734554877    
       19.60420000     950.4277340838638         1.646230675382826    
       19.60800000     954.1710424836513         1.658636050407747    
       19.61180000     954.2211295036934         1.651057480373237    
       19.61560000     953.7270577964814         1.645438386728032    
       19.61940000     955.3577887334210         1.650696782833367    
       19.62320000     956.9241461686578         1.655809342028268    
       19.62700000     957.0318105786804         1.658657711283500    
       19.63080000     956.0589458493349         1.661863357076789    
       19.63460000     956.2626299643441         1.656620248819897    
       19.63840000     956.8475998114974         1.650742502532980    
       19.64220000     954.6312185345931         1.652459334886931    
       19.64600000     954.6407320685860         1.658020870339698    
       19.64980000     955.6534119649516         1.656157859800877    
       19.65360000     955.5241930534621         1.653637019156860    
       19.65740000     951.3709340870427         1.647541427003521    
       19.66120000     950.7159600117820         1.648762053475648    
       19.66500000     947.2276761808810         1.655610658293368    
       19.66880000     948.8365090048796         1.648611884265808    
       19.67260000     944.9401703051795         1.639451228470602    
       19.67640000     940.8214657321130         1.634108917139385    
       19.68020000     939.2652988208620         1.632070244459069    
       19.68400000     941.0677243741494         1.634776046751837    
       19.68780000     938.6919722749709         1.624867747925522    
       19.69160000     937.7089840153966         1.627927194807238    
       19.69540000     938.1923502756788         1.625313586789278    
       19.69920000     935.3267281287642         1.625276090371640    
       19.70300000     932.9130889996633         1.627471984812300    
       19.70680000     932.5147793037881         1.627102002233769    
       19.71060000     932.1089338004897         1.611078131822712    
       19.71440000     930.9970066536829         1.621961033436728    
       19.71820000     930.7910314469508         1.618271120339386    
       19.72200000     929.3618725744521         1.621847775381190    
       19.72580000     927.9807751506479         1.603500962913603    
       19.72960000     926.9533080365273         1.608916986441656    
       19.73340000     924.8635567366191         1.604328853495105    
       19.73720000     923.5572541215428         1.601222021391590    
       19.74100000     923.0446554514333         1.601379006313683    
       19.74480000     922.2574463327087         1.599122877722837    
       19.74860000     922.9361953419716         1.605838448782920    
       19.75240000     923.3974673263124         1.605377078288976    
       19.75620000     921.8310427317780         1.603372623902223    
       19.76000000     923.2818988217873         1.608009283946833    
       19.76380000     920.4361185088352         1.604357475175247    
       19.76760000     917.5354856988619         1.597061637740870    
       19.77140000     916.3183215410561         1.594483494806274    
       19.77520000     916.0348728183852         1.589222767532652    
       19.77900000     916.8595598182103         1.593970050874281    
       19.78280000     918.8472588882356         1.603468208353619    
       19.78660000     917.0675785455115         1.605037729558235    
       19.79040000     915.8025654504914         1.599978252532208    
       19.79420000     913.5086685595312         1.597268698195127    
       19.79800000     915.6403026433289         1.621616822485810    
       19.80180000     916.0010487749191         1.809853345721006    
       19.80560000     915.6934073881284         1.595293985298823    
       19.80940000     913.5201862470429         1.595256009921845    
       19.81320000     915.8711044922862         1.593783029395548    
       19.81700000     916.3782871495481         1.596662984265694    
       19.82080000     916.1416559659474         1.593283595537210    
       19.82460000     919.1092387178342         1.592847452426350    
       19.82840000     920.7235294628543         1.593098621315552    
       19.83220000     921.9064960706454         1.601947989898383    
       19.83600000     923.9706900787445         1.612374740951374    
       19.83980000     925.1385021972895         1.614755181814744    
       19.84360000     929.2397670909046         1.618497869887664    
       19.84740000     932.4341816503942         1.625407293720378    
       19.85120000     933.0251779325831         1.622122018117018    
       19.85500000     934.9033647685736         1.617456805998216    
       19.85880000     939.2319342331489         1.629912350538659    
       19.86260000     942.4614850730560         1.633213648916266    
       19.86640000     943.8342364274109         1.634838976478806    
       19.87020000     945.3497342987549         1.633661259927464    
       19.87400000     948.7666646510756         1.642956921908243    
       19.87780000     952.6712501087085         1.644036739261288    
       19.88160000     955.6172286677748         1.643298792986791    
       19.88540000     957.5902198585443         1.645120349442779    
       19.88920000     959.2991574203598         1.653104885904640    
       19.89300000     959.5128448738288         1.652720411283474    
       19.89680000     961.7321385824524         1.654422707423090    
       19.90060000     962.7625982469588         1.661198351623554    
       19.90440000     964.3949093105120         1.670600726919038    
       19.90820000     968.3476798099676         1.676114086848316    
       19.91200000     969.5458326010813         1.668231938509132    
       19.91580000     971.2131542431731         1.667420571741777    
       19.91960000     970.5257546310775         1.666975834536601    
       19.92340000     969.4943954647227         1.669399160024418    
       19.92720000     970.6554662818294         1.676391264605714    
       19.93100000     970.9929732292213         1.678441075053023    
       19.93480000     973.3285184870576         1.675471865134708    
       19.93860000     973.8464955843074         1.670038417047840    
       19.94240000     970.5914698989948         1.674051541379702    
       19.94620000     969.6429666773748         1.668114506492372    
       19.95000000     966.7949665372035         1.663453364304133    
       19.95380000     965.7901052634896         1.663863824257104    
       19.95760000     965.3719779845854         1.670944300455364    
       19.96140000     964.1593408249671         1.678630153207152    
       19.96520000     961.7200050916564         1.668360456658706    
       19.96900000     961.1845057037258         1.664806411146451    
       19.97280000     956.4092727425231         1.650998186584523    
       19.97660000     954.6287797500704         1.651252512439245    
       19.98040000     952.4777871368537         1.650451121455306    
       19.98420000     949.3798742316581         1.646794078851004    
       19.98800000     945.6835939256279         1.639222265324435    
       19.99180000     944.9043057799344         1.631038038582964    
       19.99560000     942.2849802205823         1.635327825061798    
       19.99940000     939.4545687907456         1.624876291671116    
       20.00320000     939.0312637464162         1.813495370593264    
       20.00700000     936.1949583326560         1.673623203477991    
       20.01080000     934.6894702962420         1.626669234929796    
       20.01460000     932.5842350146835         1.621680250383464    
       20.01840000     929.3787201741163         1.618249641749850    
       20.02220000     928.8581143024122         1.610411528497284    
       20.02600000     925.8239555119386         1.610663169193660    
       20.02980000     924.5198198583581         1.602223912337286    
       20.03360000     922.8104647285213         1.594757581755864    
       20.03740000     921.8608716522310         1.597262754269569    
       20.04120000     920.1582172977071         1.594290007854721    
       20.04500000     919.6556037790258         1.594878767645080    
       20.04880000     918.8026258947057         1.588619236786070    
       20.05260000     918.0681794080928         1.581230545867649    
       20.05640000     919.2835833851968         1.827280115161325    
       20.06020000     920.6255558017724         1.839047065084256    
       20.06400000     917.9772970708934         1.841166881436847    
       20.06780000     920.5689713559124         1.852062175934484    
       20.07160000     918.7804151489379         1.845724416151564    
       20.07540000     922.7220465919644         1.844855586285491    
       20.07920000     921.3689198530519         1.841500748573815    
       20.08300000     923.0443807726474         1.860078388839759    
       20.08680000     925.2364909721118         1.855795678704289    
       20.09060000     929.0032093764477         1.878170631702057    
       20.09440000     928.2847352380284         1.853898381527356    
       20.09820000     932.6021310038343         1.907659905541919    
       20.10200000     935.0288609330698         2.231014374831565    
       20.10580000     937.4378230111544         1.878185806514430    
       20.10960000     939.5935590419112         1.876662204316588    
       20.11340000     939.5610104408738         1.873364072831589    
       20.11720000     942.0581468338229         1.873970610318016    
       20.12100000     943.2252653812224         1.885144287482430    
       20.12480000     946.5158133080450         1.881809862961522    
       20.12860000     948.8749889651452         1.883142858074323    
       20.13240000     951.0021915483861         1.891322141163081    
       20.13620000     950.4022884594108         1.896103600349949    
       20.14000000     950.8613740467581         1.896820163463501    
       20.14380000     950.6902406630569         1.896524806856605    
       20.14760000     951.0514232651101         1.902879172184331    
       20.15140000     950.7629074479303         1.899081525268918    
       20.15520000     949.8368800829456         1.891146128931661    
       20.15900000     947.8604085866986         1.895499582196703    
       20.16280000     947.1026313318775         1.889727966725090    
       20.16660000     946.4054333600145         1.889706630616400    
       20.17040000     945.0354331137162         1.882609142882409    
       20.17420000     944.1963908979297         1.883516215589918    
       20.17800000     940.5613932086010         1.879913407067140    
       20.18180000     939.2198001921724         1.866920008935479    
       20.18560000     937.5775814000165         1.862414665359832    
       20.18940000     935.8786698094603         1.867283856227937    
       20.19320000     931.8585360225460         1.859873698616478    
       20.19700000     930.0643716875227         1.857733939143999    
       20.20080000     926.9204217551129         1.864055840088467    
       20.20460000     922.4000284701509         1.854874895550030    
       20.20840000     920.7986033101549         1.855281705799686    
       20.21220000     917.0727797479251         1.846325474759887    
       20.21600000     915.3727811376856         1.842175696688930    
       20.21980000     913.3550754825594         1.837334149539678    
       20.22360000     911.1705327580225         1.832952538279794    
       20.22740000     910.3864240093052         1.828101191907736    
       20.23120000     907.5067775097632         1.832200642258881    
       20.23500000     905.8070294370197         1.828216503613866    
       20.23880000     903.4451266203992         1.814843639582054    
       20.24260000     899.4717536859633         1.814751694537959    
       20.24640000     898.0345646554705         1.815596909758536    
       20.25020000     897.1290529280600         1.554979222471074    
       20.25400000     898.2976122934157         1.565245649431829    
       20.25780000     895.0509745994617         1.564012256761982    
       20.26160000     893.9637687678519         1.564490834513917    
       20.26540000     892.1438275458257         1.566410559137413    
       20.26920000     891.4461822425204         1.562106784084810    
       20.27300000     890.7413823586952         1.556812973450165    
       20.27680000     891.2183644962907         1.561449252536362    
       20.28060000     889.1787237547644         1.562310320268388    
       20.28440000     889.3253943712183         1.563925920209193    
       20.28820000     887.5605861826729         1.560415299233654    
       20.29200000     884.9346229483431         1.551023843843053    
       20.29580000     886.6891422098555         1.551882480306748    
       20.29960000     885.2597792403386         1.552832256451999    
       20.30340000     884.4714793479186         1.721998414994553    
       20.30720000     884.8320628213385         1.597775268352909    
       20.31100000     882.6879336427647         1.559000316931690    
       20.31480000     883.0646922495662         1.553815037584469    
       20.31860000     883.0121017363305         1.551293080651024    
       20.32240000     882.0860841843532         1.543362622921851    
       20.32620000     884.1901350079405         1.547551470336269    
       20.33000000     883.8762423936101         1.543997259723715    
       20.33380000     884.0477488791679         1.544176645700316    
       20.33760000     884.3778843898478         1.542473396618538    
       20.34140000     882.8079164515522         1.549447836370686    
       20.34520000     882.7817059370842         1.539216959430400    
       20.34900000     883.1270139821817         1.537961596016509    
       20.35280000     883.0488873513467         1.530071970638941    
       20.35660000     884.5308601047974         1.757766574492465    
       20.36040000     883.0709573637020         1.785470166174302    
       20.36420000     882.7622778522945         1.780958801835106    
       20.36800000     883.4294999319624         1.782253657889437    
       20.37180000     883.7856686459947         1.780497035565713    
       20.37560000     881.5172506860246         1.771941643083869    
       20.37940000     882.3112873851290         1.773592485689667    
       20.38320000     882.8276755238877         1.781421222073862    
       20.38700000     881.6756666367318         1.794249461964339    
       20.39080000     882.0383125456364         1.785991999838973    
       20.39460000     881.7741587416157         1.793258841711470    
       20.39840000     880.8560587401161         1.790971939503277    
       20.40220000     879.1098396304275         1.859563720956161    
       20.40600000     879.2478591432359         2.003791457042964    
       20.40980000     876.8974659246023         1.788242357238631    
       20.41360000     877.2083729842153         1.772333579480408    
       20.41740000     879.4726475197245         1.780009728852573    
       20.42120000     877.8728980229810         1.774424644382936    
       20.42500000     876.3191350150639         1.774547578010804    
       20.42880000     876.7423494075074         1.771946711796297    
       20.43260000     876.4337809531582         1.770630487370571    
       20.43640000     877.0857520137022         1.772800650488282    
       20.44020000     873.5377640390899         1.775591131135793    
       20.44400000     875.4659774479171         1.784139792337580    
       20.44780000     875.8206500200967         1.783674296273715    
       20.45160000     871.2691599371107         1.776602683316994    
       20.45540000     872.3687503969985         1.766788013432319    
       20.45920000     872.5484435865237         1.766003080410008    
       20.46300000     871.7817420961146         1.776031430065232    
       20.46680000     870.9339676457956         1.771318082032652    
       20.47060000     871.7218770865253         1.773153834180908    
       20.47440000     871.1452604073908         1.765875883967535    
       20.47820000     871.5811848061940         1.761104993436261    
       20.48200000     870.4109904736933         1.768001993114537    
       20.48580000     872.1533193138760         1.766321238864874    
       20.48960000     870.4519927995260         1.760420831495814    
       20.49340000     870.4969717806534         1.770555478351693    
       20.49720000     869.3309174028368         1.768416082894124    
       20.50100000     869.0209102310803         1.764658407831688    
       20.50480000     869.6147308606951         1.769250774469102    
       20.50860000     869.7792929803023         1.772620731677231    
       20.51240000     870.4226352183946         1.771942431797044    
       20.51620000     870.1466530518305         1.774668154928469    
       20.52000000     867.4247787032361         1.771240769669057    
       20.52380000     868.5049056022090         1.768635902781076    
       20.52760000     869.9853471956769         1.773333400282070    
       20.53140000     870.4274590316006         1.775302082181110    
       20.53520000     868.1431868109872         1.761816896121036    
       20.53900000     868.7214244168380         1.765370384480089    
       20.54280000     866.9674240386416         1.763915344105386    
       20.54660000     869.1639655664428         1.776215202718884    
       20.55040000     869.3141081762029         1.516276673663972    
       20.55420000     871.5921549614477         1.524700986625926    
       20.55800000     870.2651597907054         1.526355494795957    
       20.56180000     871.4226347767615         1.534540167748659    
       20.56560000     871.7679915385385         1.534523433645435    
       20.56940000     871.4965672940147         1.529539289960655    
       20.57320000     872.0628068662558         1.536705135701699    
       20.57700000     870.7898458237020         1.535169619638209    
       20.58080000     871.3747928774587         1.531851060437732    
       20.58460000     872.5263978960706         1.537955629682564    
       20.58840000     871.0308480700949         1.537442625758874    
       20.59220000     872.6550576272170         1.536180599170071    
       20.59600000     871.1807425187783         1.532401264951885    
       20.59980000     872.6797474864748         1.533464030060142    
       20.60360000     872.1789801882881         1.576225300196987    
       20.60740000     873.0876477157950         1.648675215035485    
       20.61120000     873.9906868140226         1.589874197026732    
       20.61500000     875.7204377940058         1.547751921076735    
       20.61880000     875.9413733664372         1.540771110831958    
       20.62260000     875.4051083204756         1.533630186885787    
       20.62640000     874.5844118584758         1.533176154314112    
       20.63020000     875.3300854764267         1.534397748347465    
       20.63400000     877.4925332804678         1.538224442324105    
       20.63780000     879.2679228098339         1.540665313031281    
       20.64160000     878.5250350933535         1.543716712367142    
       20.64540000     880.5168156122959         1.537522582848526    
       20.64920000     882.0109765464921         1.542212366227184    
       20.65300000     883.0421005829623         1.538540467500980    
       20.65680000     882.8308386485173         1.587483674222948    
       20.66060000     885.9724316839589         1.744370933733313    
       20.66440000     886.8588785435998         1.785388133212183    
       20.66820000     887.0557894508390         1.789452359508091    
       20.67200000     887.2613479707604         1.786625212397257    
       20.67580000     886.5370196902600         1.781414021910702    
       20.67960000     887.7586931922589         1.786691347961774    
       20.68340000     889.5214307666805         1.799173281706216    
       20.68720000     887.9673771886827         1.796953383525938    
       20.69100000     887.8992546410623         1.797614690198247    
       20.69480000     889.1189433741872         1.787265585876296    
       20.69860000     890.3788610374423         1.823212199128997    
       20.70240000     889.6613405970188         2.008942325127115    
       20.70620000     889.3174187268564         1.848948069362153    
       20.71000000     889.0289738279448         1.789412674356425    
       20.71380000     889.0390453579548         1.790071772842152    
       20.71760000     890.0363487357470         1.791986093136499    
       20.72140000     891.0988887121954         1.792369166983488    
       20.72520000     890.1391655684079         1.788977797736639    
       20.72900000     889.4097009309440         1.791303857159066    
       20.73280000     889.7521231717457         1.797238397284662    
       20.73660000     889.4846160587280         1.788854390264321    
       20.74040000     890.4719388944505         1.790396861972243    
       20.74420000     891.3961530293196         1.798526919333550    
       20.74800000     891.8966203343616         1.801911188246162    
       20.75180000     892.2998132880160         1.799609336097681    
       20.75560000     890.4760290767606         1.788888474344965    
       20.75940000     889.1715085114706         1.791043772383353    
       20.76320000     891.2366640889245         1.801464278426133    
       20.76700000     892.0866729278944         1.802655946706773    
       20.77080000     891.7725182798381         1.797388020717254    
       20.77460000     891.4984114999334         1.797075204762873    
       20.77840000     892.8471904742134         1.797172723048021    
       20.78220000     892.6194265299587         1.800118658546328    
       20.78600000     890.9677447403200         1.791540229399190    
       20.78980000     890.9085293914284         1.800191072530020    
       20.79360000     891.8712864784771         1.800299476398511    
       20.79740000     889.8014070106813         1.795101691135226    
       20.80120000     889.5691694398488         1.796834499077432    
       20.80500000     887.3904682136958         1.794727474882671    
       20.80880000     886.9619730856651         1.791677646057755    
       20.81260000     887.3430879792134         1.799287687150585    
       20.81640000     887.0413243282444         1.803485192622698    
       20.82020000     884.6631694355580         1.804230966400224    
       20.82400000     883.0828029665263         1.788923884161814    
       20.82780000     881.8744476855866         1.783571465639033    
       20.83160000     878.2234436022736         1.780525855939677    
       20.83540000     879.1818555708629         1.782442151660250    
       20.83920000     877.0300494372839         1.775967197408199    
       20.84300000     872.8057583185434         1.778240118700187    
       20.84680000     872.6770010452005         1.772504067965569    
       20.85060000     868.9261169345331         1.693974556280523    
       20.85440000     867.4892751371480         1.532420072910299    
       20.85820000     866.1243316321189         1.520129631523409    
       20.86200000     866.3660086689472         1.521458942067715    
       20.86580000     862.5154385886774         1.519559290612783    
       20.86960000     860.5737811400871         1.506361998659719    
       20.87340000     859.3513460580964         1.517620148462260    
       20.87720000     859.5567886518436         1.523230781775514    
       20.88100000     857.3758332728736         1.508363846829196    
       20.88480000     857.5812318865442         1.517091156267481    
       20.88860000     853.4973020234377         1.512890173723483    
       20.89240000     852.7999739704555         1.510368274890361    
       20.89620000     850.2953240256038         1.511507068507337    
       20.90000000     848.2327367114958         1.506186424422103    
       20.90380000     847.3775808961459         1.633837798287757    
       20.90760000     848.0730649690634         1.565907020506408    
       20.91140000     843.8894615390062         1.514435466197940    
       20.91520000     843.7927228820040         1.499657662022915    
       20.91900000     841.9783035862918         1.499316021987916    
       20.92280000     840.5786230794009         1.493587182798503    
       20.92660000     841.2921127765866         1.487653837701874    
       20.93040000     838.4935954819755         1.485730010643702    
       20.93420000     837.3425429388711         1.482134508441879    
       20.93800000     837.6619175767183         1.486857448153488    
       20.94180000     836.1058019529240         1.488861700559481    
       20.94560000     835.2458089123860         1.483825494596699    
       20.94940000     835.2425667336752         1.481145835830138    
       20.95320000     835.1722539844260         1.476588444869234    
       20.95700000     835.0163192549463         1.638243122753918    
       20.96080000     834.7511943972947         1.708616709641166    
       20.96460000     831.6609588294444         1.710842235855713    
       20.96840000     833.9422047801939         1.712220263959871    
       20.97220000     831.7308474225508         1.706694076638530    
       20.97600000     831.4734168164190         1.701785255379324    
       20.97980000     830.0072015445780         1.704784826020277    
       20.98360000     829.3130577371635         1.701938624159382    
       20.98740000     828.8965458031927         1.698994939164382    
       20.99120000     825.8544243593095         1.693379245011407    
       20.99500000     825.2716689469146         1.688174606851548    
       20.99880000     825.3143863992486         1.683048419193962    
       21.00260000     825.4290262747221         1.686797498012819    
       21.00640000     824.9385628843982         1.691287473479126    
       21.01020000     823.5788507501165         1.694152418354218    
       21.01400000     823.2011907161286         1.693031647201159    
       21.01780000     822.4469783830955         1.691324233272841    
       21.02160000     823.2119015819377         1.694862389874196    
       21.02540000     823.9814284550343         1.694651651882638    
       21.02920000     824.3865630152691         1.704421770027259    
       21.03300000     823.5594576288961         1.710351595409482    
       21.03680000     821.5175552648475         1.696959065695834    
       21.04060000     822.5349049879610         1.691625755922507    
       21.04440000     823.6034736068995         1.692081894229169    
       21.04820000     823.6593332632876         1.693748659643319    
       21.05200000     824.8327579110015         1.700667296561419    
       21.05580000     824.4825082335757         1.695897460533157    
       21.05960000     824.6402352706609         1.691910729664613    
       21.06340000     822.4288637011499         1.697733266732064    
       21.06720000     822.1519788188796         1.698885733220715    
       21.07100000     823.5637543842471         1.702843225139620    
       21.07480000     824.5311105191475         1.704928400881979    
       21.07860000     827.2809742550730         1.706780948645196    
       21.08240000     826.6272148630582         1.704157625189290    
       21.08620000     826.7867741617604         1.703575292464797    
       21.09000000     828.2442721043473         1.706220424221314    
       21.09380000     829.7127342233027         1.699543649382368    
       21.09760000     829.9416783105913         1.702721619780270    
       21.10140000     831.4508901798943         1.710149002271844    
       21.10520000     830.6114505538030         1.709471279940692    
       21.10900000     830.9967083638934         1.705632903162136    
       21.11280000     832.7697087184413         1.717665874205525    
       21.11660000     837.1420937146867         1.724671558381835    
       21.12040000     838.6404773818658         1.727290062914264    
       21.12420000     837.7110837367306         1.721316601845337    
       21.12800000     838.5550984373715         1.724675493982740    
       21.13180000     840.5447388844133         1.724959413348514    
       21.13560000     844.4262790386956         1.737121095823209    
       21.13940000     845.9452848006105         1.739921634911934    
       21.14320000     844.4442331736044         1.738214262305405    
       21.14700000     844.3565548750402         1.724232142488118    
       21.15080000     846.5309570282059         1.539264708678159    
       21.15460000     852.4415524255047         1.500135809589912    
       21.15840000     852.4460586743529         1.509496410421240    
       21.16220000     854.1617564963136         1.505361657450497    
       21.16600000     855.3854423266467         1.504492075618331    
       21.16980000     858.6759529052996         1.509437159166730    
       21.17360000     857.6930076898209         1.516505762651261    
       21.17740000     860.6984232663093         1.524499009365139    
       21.18120000     861.7215888337781         1.521437204270998    
       21.18500000     862.5935954679096         1.518601523293585    
       21.18880000     862.6318099994651         1.527552238765289    
       21.19260000     865.4825137792358         1.529339449331214    
       21.19640000     866.5168404978662         1.529083608898479    
       21.20020000     865.1025355098018         1.530252587956575    
       21.20400000     866.2301180494040         1.528541666862882    
       21.20780000     867.9872997067126         1.531625959318037    
       21.21160000     866.0568276326181         1.526121355963031    
       21.21540000     867.7445733658075         1.523344261111134    
       21.21920000     866.0038319401683         1.528334628542304    
       21.22300000     866.3613820023919         1.521917431789669    
       21.22680000     866.8801324564913         1.517071332957047    
       21.23060000     865.8194475980717         1.519955296538026    
       21.23440000     865.9064719585012         1.520175921043641    
       21.23820000     865.5592869847658         1.523389994264700    
       21.24200000     866.2298920533093         1.529458551924453    
       21.24580000     864.1670562934671         1.522766222591149    
       21.24960000     863.2416004230453         1.517237621651417    
       21.25340000     862.7104969432480         1.521422988510658    
       21.25720000     861.2055798106239         1.512937148610831    
       21.26100000     859.7893682835938         1.514673743676404    
       21.26480000     860.6008175979306         1.515785461192709    
       21.26860000     858.1281083206541         1.508395227231544    
       21.27240000     857.2733062777919         1.511194491018663    
       21.27620000     855.0714478856818         1.508417455745350    
       21.28000000     854.7489930924304         1.508035238057121    
       21.28380000     853.0602536135850         1.506175136725658    
       21.28760000     851.0139138820335         1.502627515250852    
       21.29140000     849.8463809652267         1.499585036268590    
       21.29520000     848.0190188209187         1.495403166745177    
       21.29900000     847.1287329281456         1.485108028318456    
       21.30280000     845.9806354927337         1.490329717747227    
       21.30660000     844.7050101341256         1.495030497215144    
       21.31040000     842.5608576935025         1.494070232178554    
       21.31420000     840.1816565574143         1.492488352568165    
       21.31800000     840.3092285383004         1.490463824485857    
       21.32180000     838.9540657518671         1.481800573430265    
       21.32560000     838.3519751221637         1.485401282493905    
       21.32940000     838.3287374893198         1.491545862380363    
       21.33320000     837.1104518324215         1.495889473868708    
       21.33700000     834.4850587773664         1.489345476348894    
       21.34080000     833.8740633189008         1.480528579708649    
       21.34460000     834.2130071683188         1.477424311889700    
       21.34840000     834.0871203208686         1.478691516634552    
       21.35220000     833.1589148647059         1.484685007412653    
       21.35600000     831.6536805601199         1.481253143325640    
       21.35980000     831.1514020335431         1.478192333735853    
       21.36360000     830.4960374684957         1.477635458092079    
       21.36740000     830.6483575564203         1.483331624757778    
       21.37120000     829.3235171259823         1.482777965176607    
       21.37500000     830.8319421312067         1.482585990213626    
       21.37880000     830.9929332863062         1.480464664479986    
       21.38260000     829.9437085432190         1.480779205978598    
       21.38640000     830.9581879965863         1.478327289395131    
       21.39020000     831.4080341843509         1.477667377655444    
       21.39400000     831.4312234262579         1.480271873513210    
       21.39780000     831.4883566522715         1.479976644989126    
       21.40160000     832.9320147333365         1.481248565909195    
       21.40540000     831.8014629173713         1.481224205363654    
       21.40920000     832.8302760117714         1.480508084485989    
       21.41300000     834.8864228355976         1.489910101423854    
       21.41680000     838.1629360185333         1.498811643867135    
       21.42060000     837.9542596219995         1.491641436960158    
       21.42440000     837.6065838809120         1.490724948097188    
       21.42820000     838.0256559929885         1.490625677628979    
       21.43200000     838.5557797666148         1.492507543148738    
       21.43580000     837.6833384345712         1.633959662848671    
       21.43960000     838.0648400734466         1.565138929001493    
       21.44340000     839.0054813184920         1.497355852224885    
       21.44720000     839.7187960074418         1.500115913444482    
       21.45100000     840.1889194029219         1.498619290291094    
       21.45480000     840.6785603975808         1.499431049897230    
       21.45860000     841.2436119844571         1.502859424599927    
       21.46240000     841.6879005067337         1.494484925676748    
       21.46620000     841.8002865159707         1.494296581114652    
       21.47000000     840.7169008375578         1.497243285273076    
       21.47380000     842.7754872270556         1.498843674433745    
       21.47760000     844.0444928755678         1.500918603438210    
       21.48140000     842.8295074459139         1.499808770560385    
       21.48520000     842.4064571742863         1.495185564815301    
       21.48900000     840.8735029793469         1.500423861577565    
       21.49280000     840.7074239516080         1.499682652454722    
       21.49660000     839.2668791136391         1.497901804688899    
       21.50040000     839.8297570243777         1.497651171300728    
       21.50420000     836.2168643903931         1.498529046981923    
       21.50800000     836.1001069545515         1.493892742767023    
       21.51180000     833.6824105361252         1.479466306892583    
       21.51560000     834.9534602862333         1.484272986119382    
       21.51940000     832.8446828991385         1.481864319798289    
       21.52320000     831.8238771606763         1.478989063045573    
       21.52700000     831.3333913388207         1.481005183121092    
       21.53080000     830.4491413698294         1.471697619570466    
       21.53460000     829.6881066728611         1.482081955348658    
       21.53840000     829.7910076370573         1.479408219910679    
       21.54220000     828.4578018554381         1.480649566263369    
       21.54600000     827.9022218840037         1.473241466666041    
       21.54980000     826.9197914755146         1.485649649549668    
       21.55360000     827.5624726361575         1.476778538189728    
       21.55740000     828.0459197966798         1.475784955746078    
       21.56120000     827.1262956011628         1.480011277064802    
       21.56500000     828.0639073108414         1.481470802228272    
       21.56880000     826.4337189577769         1.477554008241351    
       21.57260000     826.1623445713241         1.478413858639396    
       21.57640000     825.8867404814464         1.476257882245476    
       21.58020000     826.2865015777147         1.477364324535172    
       21.58400000     827.7646470185829         1.474712783470266    
       21.58780000     827.5216740238867         1.478011905324960    
       21.59160000     829.0815801193509         1.471499226184266    
       21.59540000     829.9009889542733         1.474346006664193    
       21.59920000     828.9848804753184         1.470034179119470    
       21.60300000     829.6724860034616         1.473877682839257    
       21.60680000     829.2668972789153         1.474929541639383    
       21.61060000     828.7133917288995         1.483646542878529    
       21.61440000     832.1795105689259         1.483541328942873    
       21.61820000     831.5465296461899         1.484025593207269    
       21.62200000     829.5369751168652         1.475420897701174    
       21.62580000     829.6448894512173         1.479756505224498    
       21.62960000     830.0927987925344         1.484559396541128    
       21.63340000     829.8850390902426         1.486872542717222    
       21.63720000     826.8479008926289         1.485802857327666
[truncated: 903,618 more chars]
