# Supplementary material for: Structural insight into cocrystallization with zwitterionic co-formers: cocrystals of S-naproxen
Source: Royal Society of Chemistry journal article supplement (doi:10.1039/c4ce00353e), 2014-05-13
Supplement: c4ce00353e2.dat [file c4ce00353e2.dat]

2.200210 130.351530 2.216305
2.205787 130.019810 2.207864
2.211365 129.720440 2.199736
2.216942 130.316640 2.199216
2.222519 129.420150 2.186116
2.228096 129.254350 2.179225
2.233673 129.396480 2.174956
2.239250 129.043260 2.166553
2.244828 128.843340 2.159473
2.250405 129.262530 2.157600
2.255982 129.523440 2.154415
2.261559 129.743530 2.150904
2.267137 129.575490 2.144201
2.272714 129.249330 2.136223
2.278291 129.319930 2.131553
2.283868 129.431630 2.127243
2.289445 128.529450 2.114630
2.295022 129.367100 2.116331
2.300600 129.630330 2.113325
2.306177 130.035550 2.111484
2.311754 130.054150 2.106518
2.317331 129.958600 2.100654
2.322909 129.921450 2.095288
2.328486 129.908480 2.090143
2.334063 129.578450 2.082475
2.339640 129.828610 2.079493
2.345217 129.958400 2.075562
2.350795 129.786130 2.069242
2.356372 130.050380 2.066423
2.361949 130.660640 2.066352
2.367526 131.179980 2.065555
2.373104 132.252870 2.069087
2.378681 132.137150 2.063310
2.384258 132.002850 2.057414
2.389835 132.189830 2.054043
2.395412 132.708910 2.053258
2.400990 132.623890 2.047809
2.406567 133.562090 2.050254
2.412144 134.151440 2.049999
2.417721 134.326340 2.046580
2.423298 134.402560 2.042426
2.428876 135.012440 2.042331
2.434453 136.317670 2.047455
2.440030 137.393370 2.050796
2.445607 138.471050 2.054105
2.451185 139.619510 2.057889
2.456762 140.911210 2.062670
2.462339 142.299470 2.068087
2.467916 143.924120 2.075135
2.473493 146.326740 2.087642
2.479071 149.214460 2.103374
2.484648 153.564680 2.129001
2.490225 158.649090 2.159087
2.495802 165.990460 2.203517
2.501380 175.724300 2.262123
2.506957 189.621900 2.344619
2.512534 207.657260 2.448113
2.518111 233.245100 2.588786
2.523688 268.699250 2.772408
2.529265 313.691130 2.988899
2.534843 372.349790 3.249181
2.540420 438.919010 3.519905
2.545997 509.982360 3.785810
2.551574 573.349610 4.005305
2.557152 621.617550 4.161348
2.562729 648.440430 4.240881
2.568306 641.505620 4.208932
2.573883 607.675230 4.087523
2.579460 549.557860 3.878698
2.585037 480.343540 3.618362
2.590615 405.354460 3.316747
2.596192 340.062590 3.031343
2.601769 285.858830 2.773283
2.607346 242.467210 2.548647
2.612924 211.762700 2.376702
2.618501 189.295230 2.242273
2.624078 173.563050 2.142486
2.629655 162.903750 2.071226
2.635232 155.686020 2.020511
2.640810 150.063690 1.979478
2.646387 146.088000 1.948941
2.651964 142.831410 1.923019
2.657541 140.479200 1.903093
2.663119 138.901280 1.888388
2.668696 137.119550 1.872293
2.674273 136.521240 1.864285
2.679850 135.274340 1.851866
2.685427 133.645920 1.836840
2.691005 132.164510 1.822823
2.696582 131.296250 1.813045
2.702159 130.274190 1.802225
2.707736 129.774830 1.795040
2.713313 128.706500 1.783939
2.718891 127.901310 1.774680
2.724468 127.243550 1.766464
2.730045 126.605910 1.758411
2.735622 126.684840 1.755350
2.741200 126.855930 1.752939
2.746777 126.789070 1.748896
2.752354 126.555750 1.743724
2.757931 125.914620 1.735762
2.763508 125.960240 1.732550
2.769086 125.925010 1.728796
2.774663 126.395680 1.728520
2.780240 126.257820 1.724090
2.785817 126.407570 1.721636
2.791395 126.195590 1.716732
2.796972 125.431050 1.708089
2.802549 125.400600 1.704461
2.808126 125.165690 1.699459
2.813703 125.184020 1.696192
2.819280 124.771740 1.690025
2.824858 124.557760 1.685219
2.830435 124.326510 1.680314
2.836012 124.292630 1.676759
2.841589 124.665450 1.675954
2.847167 124.737680 1.673133
2.852744 124.842040 1.670538
2.858321 124.637770 1.665892
2.863898 124.768880 1.663500
2.869475 124.481760 1.658333
2.875052 124.537140 1.655462
2.880630 124.948330 1.654960
2.886207 124.839510 1.651020
2.891784 124.545220 1.645871
2.897362 124.833150 1.644578
2.902939 124.683960 1.640415
2.908516 124.823650 1.638164
2.914093 125.096220 1.636791
2.919670 124.808490 1.631762
2.925247 125.033670 1.630097
2.930825 125.331130 1.628907
2.936402 124.858540 1.622723
2.941979 125.127580 1.621368
2.947556 125.536140 1.620918
2.953134 125.153950 1.615370
2.958711 125.098190 1.611943
2.964288 125.218960 1.609665
2.969865 125.180530 1.606373
2.975442 125.802010 1.607315
2.981019 125.977390 1.605403
2.986597 125.686840 1.600534
2.992174 126.201070 1.600793
2.997751 125.988700 1.596448
3.003328 125.372630 1.589560
3.008906 125.416110 1.586866
3.014483 125.459250 1.584180
3.020060 125.040830 1.578594
3.025637 125.197410 1.576648
3.031214 125.338400 1.574610
3.036792 125.401880 1.572094
3.042369 125.658770 1.570796
3.047946 125.145740 1.564696
3.053523 125.433400 1.563610
3.059101 125.624520 1.561925
3.064678 125.562910 1.558678
3.070255 125.658740 1.556418
3.075832 125.872400 1.554894
3.081409 125.900650 1.552231
3.086987 125.529330 1.547118
3.092564 125.695950 1.545330
3.098141 125.746150 1.542834
3.103718 125.804780 1.540398
3.109295 125.853630 1.537911
3.114873 125.641300 1.533839
3.120450 125.764530 1.531826
3.126027 126.018640 1.530615
3.131604 126.311250 1.529639
3.137182 126.534460 1.528246
3.142759 127.189420 1.529455
3.148336 127.035980 1.525801
3.153913 126.844280 1.521931
3.159490 126.788440 1.518888
3.165068 126.815800 1.516352
3.170645 126.745190 1.513241
3.176222 127.224000 1.513412
3.181799 127.377170 1.511646
3.187377 127.097990 1.507324
3.192954 127.210580 1.505335
3.198531 126.791240 1.500208
3.204108 126.641330 1.496689
3.209685 126.668590 1.494227
3.215262 126.492040 1.490572
3.220840 126.839450 1.490011
3.226417 126.748700 1.486881
3.231994 127.031170 1.485945
3.237571 127.318470 1.485039
3.243149 127.462390 1.483301
3.248726 127.355900 1.480113
3.254303 127.519050 1.478500
3.259880 127.645510 1.476680
3.265457 127.370920 1.472548
3.271034 127.496890 1.470742
3.276612 127.575670 1.468669
3.282189 127.739510 1.467092
3.287766 127.984090 1.465982
3.293344 127.961890 1.463350
3.298921 128.062240 1.461426
3.304498 128.355440 1.460606
3.310075 128.322570 1.457936
3.315652 127.808570 1.452543
3.321229 127.891140 1.450550
3.326807 127.442780 1.445555
3.332384 127.219110 1.441846
3.337961 127.197210 1.439290
3.343538 127.469190 1.438402
3.349116 127.627320 1.436875
3.354693 127.429280 1.433350
3.360270 127.359390 1.430556
3.365847 127.497580 1.428937
3.371424 127.695140 1.427656
3.377001 127.428470 1.423786
3.382579 127.551890 1.422104
3.388156 127.561140 1.419792
3.393733 127.639530 1.417872
3.399310 127.904130 1.416989
3.404888 127.606160 1.412997
3.410465 127.457490 1.409842
3.416042 127.441600 1.407429
3.421619 127.197620 1.403767
3.427196 127.285290 1.401943
3.432774 127.860750 1.402803
3.438351 128.349530 1.403179
3.443928 128.477130 1.401580
3.449505 128.599380 1.399957
3.455083 128.568660 1.397507
3.460660 128.988770 1.397510
3.466237 128.797150 1.394202
3.471814 128.812000 1.392020
3.477391 128.861100 1.390029
3.482969 128.746260 1.387162
3.488546 128.682980 1.384581
3.494123 128.414720 1.380907
3.499700 128.516400 1.379229
3.505277 128.553760 1.377212
3.510855 128.420730 1.374290
3.516432 128.038850 1.370046
3.522009 128.450530 1.370051
3.527586 128.735400 1.369378
3.533164 128.442950 1.365640
3.538741 128.530980 1.363932
3.544318 128.471300 1.361447
3.549895 128.564960 1.359781
3.555472 128.749220 1.358597
3.561050 128.871490 1.357091
3.566627 129.130000 1.356304
3.572204 129.150250 1.354270
3.577781 129.082930 1.351784
3.583359 128.998210 1.349214
3.588936 129.282940 1.348580
3.594513 129.262020 1.346356
3.600090 129.551250 1.345750
3.605667 129.409870 1.342913
3.611244 129.479510 1.341177
3.616822 129.564380 1.339524
3.622399 129.357030 1.336368
3.627976 129.423630 1.334635
3.633553 129.436600 1.332630
3.639131 129.550740 1.331151
3.644708 129.162670 1.327099
3.650285 128.873000 1.323562
3.655862 128.951340 1.321922
3.661439 129.302280 1.321680
3.667016 129.390630 1.320098
3.672594 129.707640 1.319684
3.678171 129.920140 1.318739
3.683748 129.738540 1.315799
3.689326 129.674090 1.313460
3.694903 129.665820 1.311413
3.700480 129.924510 1.310719
3.706057 130.028210 1.309246
3.711634 129.951190 1.306868
3.717211 129.889970 1.304577
3.722789 129.697880 1.301636
3.728366 129.704480 1.299699
3.733943 129.307240 1.295746
3.739520 129.540390 1.294957
3.745098 129.552670 1.293067
3.750675 129.649290 1.291603
3.756252 129.620300 1.289518
3.761829 129.359310 1.286286
3.767406 129.494170 1.285028
3.772984 129.638670 1.283821
3.778561 129.743240 1.282420
3.784138 129.456440 1.279091
3.789715 129.883320 1.279290
3.795292 129.866730 1.277306
3.800870 129.519910 1.273704
3.806447 129.679260 1.272597
3.812024 129.824340 1.271423
3.817601 129.917650 1.269999
3.823179 129.920240 1.268136
3.828756 129.935120 1.266338
3.834333 130.038620 1.264976
3.839910 130.083710 1.263335
3.845487 129.609770 1.259180
3.851065 129.660690 1.257580
3.856642 130.020020 1.257477
3.862219 129.837620 1.254757
3.867796 129.982590 1.253624
3.873374 129.919310 1.251492
3.878951 129.821560 1.249199
3.884528 129.881760 1.247672
3.890105 129.699780 1.244987
3.895682 129.775210 1.243543
3.901259 130.031330 1.242967
3.906837 130.158780 1.241778
3.912414 130.079380 1.239606
3.917991 130.549960 1.240055
3.923568 130.321910 1.237188
3.929146 130.657960 1.237000
3.934723 130.404050 1.234023
3.940300 130.284650 1.231689
3.945877 130.661410 1.231702
3.951454 130.814680 1.230662
3.957032 130.614400 1.227963
3.962609 130.681230 1.226525
3.968186 130.468060 1.223779
3.973763 130.358180 1.221524
3.979341 130.313340 1.219579
3.984918 130.506090 1.218749
3.990495 130.521120 1.217093
3.996072 130.478550 1.215173
4.001649 130.190730 1.212117
4.007226 130.079440 1.209889
4.012804 130.169040 1.208601
4.018381 130.485640 1.208367
4.023958 130.688840 1.207608
4.029535 130.702770 1.205978
4.035112 130.905980 1.205224
4.040690 131.218030 1.204971
4.046267 131.011520 1.202339
4.051844 130.981490 1.200524
4.057421 131.447560 1.200981
4.062999 131.175690 1.198069
4.068576 130.936540 1.195312
4.074153 131.000700 1.193945
4.079730 130.704820 1.190942
4.085308 130.630230 1.188954
4.090885 130.226900 1.185476
4.096462 130.297180 1.184158
4.102039 130.715160 1.184420
4.107616 131.034190 1.184231
4.113194 131.252230 1.183586
4.118771 131.648150 1.183741
4.124348 131.730030 1.182485
4.129925 131.590410 1.180239
4.135502 131.427900 1.177896
4.141079 131.368640 1.176021
4.146657 131.320470 1.174200
4.152234 131.241870 1.172249
4.157811 131.414320 1.171422
4.163388 131.564040 1.170496
4.168966 131.578870 1.168973
4.174543 131.677510 1.167825
4.180120 131.670180 1.166211
4.185697 131.615430 1.164392
4.191275 131.504120 1.162327
4.196852 131.499530 1.160739
4.202429 130.947220 1.156739
4.208006 130.954640 1.155215
4.213584 131.230060 1.154875
4.219161 131.524440 1.154618
4.224738 131.591870 1.153366
4.230315 131.846880 1.152938
4.235892 131.908480 1.151666
4.241469 131.661180 1.149049
4.247046 131.713610 1.147746
4.252624 131.494610 1.145264
4.258201 131.313630 1.142953
4.263778 131.505510 1.142268
4.269355 131.438720 1.140463
4.274933 131.603820 1.139667
4.280510 131.804340 1.139026
4.286087 131.626430 1.136752
4.291664 131.339480 1.134013
4.297242 131.400770 1.132782
4.302819 131.568360 1.132012
4.308396 131.648010 1.130866
4.313973 131.713360 1.129661
4.319551 131.835950 1.128703
4.325128 131.965060 1.127776
4.330705 131.933170 1.126165
4.336282 131.804080 1.124143
4.341859 131.847430 1.122860
4.347436 131.738890 1.120934
4.353014 131.876860 1.120061
4.358591 132.051090 1.119343
4.364168 132.595920 1.120193
4.369745 132.880260 1.119938
4.375322 132.485460 1.116825
4.380900 132.237850 1.114336
4.386477 132.162990 1.112581
4.392054 131.959960 1.110291
4.397631 132.083530 1.109379
4.403209 132.351810 1.109075
4.408786 132.283890 1.107364
4.414363 132.321010 1.106097
4.419940 132.192210 1.104140
4.425518 132.112340 1.102392
4.431095 132.340180 1.101930
4.436672 132.269930 1.100229
4.442249 132.308290 1.098984
4.447826 132.192990 1.097104
4.453404 132.068760 1.095191
4.458981 132.107090 1.093957
4.464558 132.244060 1.093133
4.470135 132.178650 1.091476
4.475712 132.221100 1.090267
4.481289 132.749730 1.091061
4.486867 132.727580 1.089591
4.492444 132.807750 1.088543
4.498021 133.055310 1.088183
4.503598 133.024670 1.086686
4.509176 132.558490 1.083415
4.514753 132.626190 1.082330
4.520330 132.760440 1.081518
4.525907 132.557070 1.079334
4.531485 132.638370 1.078312
4.537062 132.499680 1.076400
4.542639 132.838760 1.076430
4.548216 132.824010 1.075027
4.553793 132.694550 1.073163
4.559370 132.809190 1.072290
4.564948 132.674910 1.070415
4.570525 132.539340 1.068539
4.576102 132.525880 1.067159
4.581679 132.718140 1.066609
4.587256 132.561390 1.064659
4.592834 132.832150 1.064428
4.598411 132.658710 1.062419
4.603988 132.594070 1.060850
4.609565 133.011170 1.061208
4.615142 132.913160 1.059512
4.620720 133.110170 1.058993
4.626297 133.475810 1.059145
4.631874 133.613420 1.058391
4.637452 133.759200 1.057671
4.643029 133.795550 1.056520
4.648606 133.777620 1.055158
4.654183 133.565750 1.053035
4.659760 133.656770 1.052110
4.665338 133.642910 1.050774
4.670915 133.757020 1.049943
4.676492 133.710880 1.048487
4.682069 133.782460 1.047494
4.687646 133.611340 1.045555
4.693224 133.628660 1.044357
4.698801 133.785780 1.043706
4.704378 133.579500 1.041641
4.709955 133.609090 1.040499
4.715532 133.803650 1.040001
4.721109 133.948940 1.039313
4.726687 134.328080 1.039531
4.732264 134.503430 1.038960
4.737841 134.277080 1.036839
4.743418 134.202060 1.035307
4.748996 134.520450 1.035293
4.754573 134.216690 1.032887
4.760150 134.362240 1.032212
4.765727 134.638900 1.032041
4.771305 134.530490 1.030396
4.776882 134.439210 1.028820
4.782459 134.634290 1.028342
4.788036 134.606120 1.027013
4.793613 134.724730 1.026246
4.799190 134.829760 1.025429
4.804768 134.892610 1.024453
4.810345 135.187790 1.024361
4.815922 135.319020 1.023647
4.821499 135.154860 1.021819
4.827076 135.528730 1.022025
4.832654 135.481380 1.020643
4.838231 135.610750 1.019929
4.843808 135.505830 1.018337
4.849385 135.395290 1.016727
4.854963 135.334240 1.015306
4.860540 135.496310 1.014724
4.866117 135.498170 1.013544
4.871694 135.810990 1.013528
4.877272 136.254490 1.013996
4.882849 136.396120 1.013340
4.888426 136.673020 1.013187
4.894003 136.550830 1.011556
4.899580 136.782180 1.011236
4.905158 136.866420 1.010373
4.910735 136.723600 1.008675
4.916312 136.930310 1.008268
4.921889 137.193100 1.008067
4.927466 137.549640 1.008209
4.933044 137.823530 1.008048
4.938621 138.319310 1.008694
4.944198 138.718380 1.008985
4.949775 139.015490 1.008902
4.955352 139.235230 1.008539
4.960930 139.836580 1.009553
4.966507 140.337630 1.010200
4.972084 140.843960 1.010862
4.977661 141.411180 1.011736
4.983239 141.915710 1.012380
4.988816 142.535580 1.013430
4.994393 143.437420 1.015471
4.999970 144.530030 1.018169
5.005547 145.652710 1.020952
5.011125 146.705670 1.023471
5.016702 147.927000 1.026554
5.022279 148.821350 1.028484
5.027856 150.340520 1.032548
5.033433 152.663310 1.039316
5.039010 154.746170 1.045198
5.044588 157.934560 1.054717
5.050165 161.761030 1.066213
5.055742 166.501690 1.080504
5.061319 173.310000 1.101131
5.066897 181.880540 1.126760
5.072474 193.768360 1.161692
5.078051 210.067080 1.208205
5.083628 230.657010 1.264613
5.089206 258.296390 1.336738
5.094783 293.655210 1.423704
5.100360 335.240140 1.519472
5.105937 383.749330 1.623877
5.111515 435.287570 1.727557
5.117092 482.939880 1.817634
5.122669 526.160580 1.895113
5.128246 558.465880 1.950252
5.133823 581.101440 1.987172
5.139400 595.415530 2.009265
5.144978 601.432130 2.017151
5.150555 602.612120 2.016892
5.156132 598.846500 2.008355
5.161709 586.988950 1.986173
5.167286 566.761900 1.949497
5.172864 535.131710 1.892226
5.178441 495.520480 1.818840
5.184018 448.014130 1.727552
5.189595 397.268400 1.624985
5.195173 347.971920 1.519154
5.200750 300.945980 1.411227
5.206327 263.411830 1.318845
5.211904 232.755480 1.238369
5.217482 208.757140 1.171508
5.223059 191.641330 1.121228
5.228636 179.099950 1.082736
5.234213 170.127780 1.054116
5.239790 163.485290 1.032206
5.245368 158.481200 1.015179
5.250945 154.721710 1.001974
5.256522 151.871960 0.991625
5.262099 149.357670 0.982315
5.267676 147.524990 0.975211
5.273253 146.108220 0.969465
5.278830 144.646070 0.963558
5.284408 143.596790 0.959019
5.289985 142.581330 0.954590
5.295562 141.867430 0.951169
5.301140 141.220690 0.947976
5.306717 140.770370 0.945444
5.312294 140.311750 0.942887
5.317871 139.703640 0.939830
5.323449 139.287020 0.937420
5.329026 138.832610 0.934885
5.334603 138.390660 0.932396
5.340180 138.155040 0.930605
5.345758 137.934310 0.928866
5.351335 137.488080 0.926372
5.356912 137.266570 0.924637
5.362489 137.230550 0.923530
5.368066 137.072740 0.922015
5.373643 137.168350 0.921355
5.379220 137.028720 0.919907
5.384798 136.839980 0.918297
5.390375 136.889280 0.917488
5.395952 136.621570 0.915618
5.401529 136.424880 0.913990
5.407106 136.576100 0.913529
5.412684 136.386830 0.911931
5.418261 136.110080 0.910043
5.423838 136.083400 0.908994
5.429416 135.989970 0.907724
5.434993 135.890110 0.906435
5.440570 135.796630 0.905170
5.446147 135.709990 0.903930
5.451725 135.578670 0.902544
5.457302 135.619800 0.901734
5.462879 135.419280 0.900123
5.468456 135.246980 0.898609
5.474033 135.189830 0.897479
5.479610 135.240910 0.896711
5.485188 135.290420 0.895939
5.490765 135.496440 0.895686
5.496342 135.738970 0.895553
5.501919 135.589310 0.894128
5.507496 135.398330 0.892569
5.513073 135.333600 0.891428
5.518651 135.015170 0.889455
5.524228 134.902950 0.888163
5.529805 135.061330 0.887764
5.535382 135.170560 0.887204
5.540960 135.412690 0.887080
5.546537 135.646060 0.886927
5.552114 135.612670 0.885903
5.557692 135.444820 0.884441
5.563269 135.241970 0.882868
5.568846 135.184920 0.881774
5.574423 135.191510 0.880889
5.580000 135.085370 0.879639
5.585578 134.907580 0.878157
5.591155 134.920460 0.877299
5.596732 135.020080 0.876724
5.602309 135.135330 0.876201
5.607886 135.672470 0.877043
5.613463 135.812850 0.876600
5.619040 135.582520 0.874963
5.624618 135.482350 0.873748
5.630195 135.455900 0.872773
5.635772 135.169450 0.870962
5.641349 135.359160 0.870687
5.646927 135.449910 0.870095
5.652504 135.285230 0.868683
5.658081 135.134870 0.867320
5.663658 135.000230 0.866010
5.669236 134.789120 0.864457
5.674813 134.734540 0.863408
5.680390 134.714680 0.862473
5.685967 134.727840 0.861644
5.691545 134.816670 0.861059
5.697122 134.867720 0.860355
5.702699 135.119960 0.860292
5.708276 135.258670 0.859869
5.713853 135.360370 0.859328
5.719430 135.698990 0.859538
5.725008 135.491410 0.858020
5.730585 135.141780 0.856053
5.736162 135.044710 0.854890
5.741739 134.850520 0.853421
5.747316 134.751500 0.852255
5.752894 134.752900 0.851409
5.758471 134.753330 0.850561
5.764048 134.713150 0.849587
5.769625 134.793780 0.848995
5.775203 134.901790 0.848491
5.780780 135.200940 0.848587
5.786357 135.298980 0.848052
5.791934 135.228930 0.846992
5.797512 135.102570 0.845757
5.803089 134.928830 0.844376
5.808666 135.166200 0.844283
5.814243 135.284870 0.843819
5.819820 135.518130 0.843712
5.825398 135.701280 0.843449
5.830975 135.718600 0.842671
5.836552 135.395550 0.840839
5.842129 135.293610 0.839696
5.847706 135.229490 0.838672
5.853283 135.094310 0.837429
5.858861 135.077220 0.836554
5.864438 135.021510 0.835562
5.870015 135.129620 0.835078
5.875592 135.269330 0.834692
5.881170 135.014680 0.833090
5.886747 135.136250 0.832651
5.892324 135.028470 0.831507
5.897901 134.735020 0.829793
5.903479 134.852480 0.829346
5.909056 134.971240 0.828903
5.914633 135.075710 0.828418
5.920210 135.394700 0.828589
5.925787 135.459930 0.827984
5.931364 135.538640 0.827421
5.936942 135.599810 0.826806
5.942519 135.412350 0.825434
5.948096 135.268490 0.824198
5.953673 135.189740 0.823161
5.959250 135.173900 0.822318
5.964828 135.229060 0.821692
5.970405 135.192060 0.820788
5.975982 135.473850 0.820851
5.981559 135.551770 0.820297
5.987137 135.407290 0.819072
5.992714 135.250260 0.817810
5.998291 135.173160 0.816792
6.003868 135.043300 0.815617
6.009446 135.003690 0.814716
6.015023 135.320450 0.814890
6.020600 135.400920 0.814353
6.026177 135.458800 0.813748
6.031754 135.428990 0.812882
6.037332 135.655350 0.812785
6.042909 135.872800 0.812660
6.048486 135.696500 0.811359
6.054063 135.714550 0.810641
6.059640 135.814010 0.810167
6.065218 135.631710 0.808854
6.070795 135.635270 0.808097
6.076372 135.802520 0.807828
6.081949 135.577650 0.806394
6.087526 135.790310 0.806262
6.093104 136.014970 0.806166
6.098681 136.052640 0.805515
6.104258 136.503400 0.806086
6.109835 136.687770 0.805870
6.115413 136.476870 0.804488
6.120990 136.571490 0.804009
6.126567 136.612730 0.803374
6.132144 136.504490 0.802300
6.137721 136.730940 0.802211
6.143299 136.985720 0.802204
6.148876 136.932940 0.801297
6.154453 137.118790 0.801089
6.160030 137.040310 0.800110
6.165608 137.188450 0.799793
6.171184 137.422060 0.799726
6.176762 137.645800 0.799629
6.182339 137.966870 0.799814
6.187916 138.283920 0.799986
6.193493 138.455720 0.799737
6.199071 138.990750 0.800534
6.204648 139.537160 0.801360
6.210225 140.160100 0.802400
6.215802 141.055210 0.804211
6.221379 142.627440 0.807930
6.226957 144.756420 0.813183
6.232534 147.620410 0.820427
6.238111 151.113600 0.829309
6.243689 155.311830 0.839973
6.249266 159.928630 0.851578
6.254843 164.697310 0.863383
6.260420 169.214340 0.874335
6.265997 172.540770 0.882074
6.271574 174.274720 0.885678
6.277152 174.444350 0.885294
6.282729 173.902310 0.883105
6.288306 173.302000 0.880769
6.293883 173.656140 0.880859
6.299460 175.793440 0.885450
6.305038 179.257540 0.893312
6.310615 184.920490 0.906482
6.316192 191.223750 0.920959
6.321769 197.469250 0.935022
6.327346 202.808380 0.946712
6.332924 205.451050 0.951990
6.338501 205.205090 0.950553
6.344078 201.931990 0.942082
6.349655 195.798690 0.926820
6.355233 188.330800 0.908146
6.360810 180.103320 0.887281
6.366387 171.669130 0.865469
6.371964 164.143800 0.845519
6.377542 157.781690 0.828219
6.383119 152.402500 0.813241
6.388696 148.298370 0.801490
6.394273 145.438230 0.793005
6.399850 143.335070 0.786539
6.405428 141.875170 0.781817
6.411004 140.673800 0.777797
6.416582 139.682330 0.774352
6.422159 138.927690 0.771561
6.427736 138.302230 0.769130
6.433313 137.756390 0.766920
6.438891 137.420500 0.765296
6.444468 137.197650 0.763988
6.450045 137.175080 0.763239
6.455622 137.162370 0.762520
6.461200 137.319080 0.762271
6.466777 137.342940 0.761655
6.472354 136.987260 0.759988
6.477931 136.833130 0.758881
6.483509 136.727070 0.757909
6.489086 136.435260 0.756424
6.494663 136.551410 0.756071
6.500240 136.592970 0.755512
6.505817 136.369610 0.754222
6.511394 136.355990 0.753513
6.516972 136.257930 0.752573
6.522549 136.005070 0.751206
6.528126 136.221740 0.751137
6.533703 136.125750 0.750206
6.539280 136.275220 0.749953
6.544858 136.205600 0.749097
6.550435 135.891340 0.747570
6.556012 135.844190 0.746780
6.561589 135.854200 0.746147
6.567167 135.887920 0.745581
6.572744 136.213420 0.745815
6.578321 136.227260 0.745195
6.583898 136.146130 0.744317
6.589476 136.138400 0.743641
6.595053 136.209350 0.743181
6.600630 136.290280 0.742748
6.606207 136.318360 0.742172
6.611784 136.413620 0.741780
6.617362 136.512680 0.741399
6.622939 136.282200 0.740124
6.628516 136.302540 0.739531
6.634093 136.542240 0.739534
6.639670 136.489070 0.738743
6.645247 136.168620 0.737231
6.650825 136.241960 0.736786
6.656402 136.038380 0.735594
6.661979 135.894850 0.734565
6.667556 136.163540 0.734650
6.673134 136.327850 0.734454
6.678711 136.317320 0.733787
6.684288 136.463780 0.733543
6.689865 136.350660 0.732603
6.695443 136.240360 0.731671
6.701020 136.315250 0.731238
6.706597 136.406920 0.730850
6.712174 136.556930 0.730619
6.717752 136.720580 0.730424
6.723329 136.855830 0.730154
6.728906 136.902390 0.729648
6.734483 136.886930 0.728977
6.740060 136.562390 0.727485
6.745637 136.361660 0.726324
6.751214 136.340530 0.725642
6.756792 136.140410 0.724486
6.762369 136.350770 0.724422
6.767946 136.524140 0.724260
6.773523 136.643970 0.723955
6.779101 136.497790 0.722947
6.784678 136.320770 0.721859
6.790255 136.139800 0.720762
6.795832 136.227620 0.720378
6.801410 136.263640 0.719857
6.806987 136.486680 0.719830
6.812564 136.653520 0.719655
6.818141 136.467390 0.718551
6.823719 136.532850 0.718111
6.829296 136.601810 0.717680
6.834873 136.553160 0.716941
6.840450 137.020660 0.717557
6.846027 136.917880 0.716678
6.851604 136.816410 0.715803
6.857182 136.791610 0.715131
6.862759 136.548370 0.713889
6.868336 136.441700 0.713005
6.873913 136.480900 0.712504
6.879490 136.537770 0.712049
6.885067 136.823870 0.712192
6.890645 136.899170 0.711786
6.896222 136.851170 0.711060
6.901799 137.036220 0.710940
6.907377 136.907840 0.710008
6.912954 136.882570 0.709344
6.918531 136.983920 0.709009
6.924108 137.088440 0.708683
6.929686 137.055770 0.708002
6.935263 137.147380 0.707644
6.940840 137.193100 0.707168
6.946417 137.129930 0.706412
6.951994 137.140080 0.705846
6.957572 137.256150 0.705553
6.963149 137.264420 0.704983
6.968726 137.443340 0.704852
6.974303 137.553180 0.704545
6.979880 137.570820 0.704001
6.985457 137.444930 0.703092
6.991034 137.310640 0.702162
6.996612 137.216540 0.701336
7.002189 136.778230 0.699632
7.007766 136.723340 0.698909
7.013343 136.909610 0.698803
7.018921 136.935530 0.698289
7.024498 137.290470 0.698612
7.030075 137.372060 0.698240
7.035653 137.347560 0.697599
7.041230 137.512890 0.697440
7.046807 137.241260 0.696174
7.052384 137.239650 0.695593
7.057962 137.289670 0.695145
7.063539 137.099010 0.694088
7.069116 137.097460 0.693511
7.074693 137.179410 0.693145
7.080270 137.346630 0.692996
7.085847 137.516490 0.692853
7.091424 137.407170 0.692007
7.097002 137.336140 0.691259
7.102579 137.655080 0.691492
7.108156 137.741610 0.691141
7.113733 137.790950 0.690697
7.119310 138.080410 0.690854
7.124888 138.079100 0.690285
7.130465 138.012310 0.689552
7.136042 138.115100 0.689244
7.141619 139.092930 0.691113
7.147197 140.143050 0.693150
7.152774 140.626430 0.693777
7.158351 141.565400 0.695521
7.163928 144.476040 0.702061
7.169506 145.889420 0.704912
7.175083 147.487050 0.708183
7.180660 149.580640 0.712611
7.186237 149.099700 0.710886
7.191814 146.659320 0.704471
7.197392 145.323390 0.700685
7.202969 142.922070 0.694307
7.208546 140.686490 0.688297
7.214123 139.427570 0.684655
7.219700 138.412950 0.681606
7.225277 137.971680 0.679968
7.230855 137.726210 0.678813
7.236432 137.829350 0.678518
7.242009 137.694640 0.677638
7.247586 137.319790 0.676168
7.253164 137.481490 0.676020
7.258741 137.562070 0.675673
7.264318 137.306270 0.674500
7.269895 137.421770 0.674240
7.275473 137.677520 0.674324
7.281050 137.552460 0.673476
7.286627 137.826810 0.673605
7.292204 138.073260 0.673666
7.297782 137.928760 0.672773
7.303359 137.874830 0.672101
7.308936 137.811140 0.671408
7.314513 137.703800 0.670608
7.320090 137.816010 0.670344
7.325667 137.824280 0.669828
7.331245 137.591600 0.668728
7.336822 137.469500 0.667897
7.342399 137.247990 0.666826
7.347976 137.131350 0.666011
7.353553 137.350510 0.666011
7.359131 137.506160 0.665857
7.364708 137.479660 0.665263
7.370285 137.524320 0.664842
7.375862 137.377410 0.663958
7.381440 137.276260 0.663186
7.387017 137.355880 0.662852
7.392594 137.356510 0.662327
7.398171 137.532750 0.662226
7.403748 137.720260 0.662153
7.409326 137.988650 0.662272
7.414903 138.023040 0.661831
7.420480 138.173710 0.661668
7.426057 138.312260 0.661477
7.431634 138.270230 0.660854
7.437212 138.074220 0.659864
7.442789 138.010680 0.659192
7.448366 137.953980 0.658537
7.453943 137.836650 0.657738
7.459520 137.977390 0.657556
7.465098 138.088200 0.657302
7.470675 138.004530 0.656586
7.476252 138.046980 0.656171
7.481829 137.914430 0.655341
7.487407 137.968400 0.654955
7.492984 138.086750 0.654722
7.498561 138.295090 0.654702
7.504138 138.416900 0.654478
7.509716 138.433210 0.654004
7.515293 138.667800 0.654046
7.520870 138.745730 0.653718
7.526447 138.788070 0.653307
7.532024 138.856960 0.652959
7.537602 139.044100 0.652889
7.543179 139.012470 0.652306
7.548756 139.123020 0.652057
7.554333 139.205000 0.651741
7.559910 139.558470 0.652061
7.565487 139.825000 0.652176
7.571065 140.003250 0.652084
7.576642 140.433690 0.652578
7.582219 140.897720 0.653148
7.587796 141.126500 0.653172
7.593374 141.482510 0.653488
7.598951 142.017880 0.654216
7.604528 142.551420 0.654936
7.610105 143.195080 0.655906
7.615683 144.209000 0.657715
7.621260 145.345140 0.659791
7.626837 146.844240 0.662672
7.632414 148.491090 0.665864
7.637991 150.701890 0.670285
7.643568 153.708080 0.676416
7.649146 157.709700 0.684636
7.654723 162.707020 0.694864
7.660300 169.315190 0.708288
7.665877 177.401870 0.724448
7.671454 186.215130 0.741655
7.677032 194.977200 0.758321
7.682609 203.078130 0.773320
7.688186 209.121640 0.784141
7.693763 212.010800 0.788934
7.699341 211.448440 0.787284
7.704918 207.535770 0.779369
7.710495 200.613710 0.765675
7.716072 192.367020 0.749200
7.721650 183.787890 0.731744
7.727227 174.905140 0.713297
7.732804 167.157990 0.696789
7.738381 161.067050 0.683454
7.743958 156.290420 0.672731
7.749536 152.525800 0.664073
7.755113 149.837490 0.657694
7.760690 147.939640 0.653019
7.766267 146.423000 0.649169
7.771844 145.209550 0.645983
7.777421 144.466020 0.643838
7.782999 143.892930 0.642072
7.788576 143.395460 0.640475
7.794153 143.098140 0.639326
7.799730 143.000370 0.638624
7.805307 142.892410 0.637900
7.810885 142.858570 0.637342
7.816462 142.722350 0.636556
7.822039 142.489840 0.635557
7.827616 142.265910 0.634578
7.833194 142.292980 0.634160
7.838771 142.206560 0.633489
7.844348 142.075010 0.632719
7.849926 142.041280 0.632168
7.855503 141.937640 0.631462
7.861080 142.118350 0.631388
7.866657 142.354190 0.631437
7.872234 142.400240 0.631065
7.877811 142.599530 0.631032
7.883388 142.725630 0.630838
7.888966 142.698150 0.630304
7.894543 142.890370 0.630256
7.900120 143.167020 0.630393
7.905697 143.275600 0.630160
7.911274 143.390530 0.629941
7.916852 143.579880 0.629886
7.922429 143.819350 0.629940
7.928006 143.921490 0.629693
7.933583 143.988360 0.629370
7.939161 144.226010 0.629419
7.944738 144.259660 0.629024
7.950315 144.332760 0.628714
7.955892 144.736570 0.629125
7.961470 145.149990 0.629554
7.967047 145.744020 0.630372
7.972624 146.249040 0.630994
7.978201 146.585240 0.631250
7.983778 146.963500 0.631595
7.989356 147.490420 0.632257
7.994933 148.132130 0.633161
8.000510 149.087830 0.634730
8.006087 150.318470 0.636872
8.011664 151.989430 0.639928
8.017242 153.618930 0.642874
8.022819 155.919390 0.647191
8.028396 158.925900 0.652918
8.033974 163.048400 0.660844
8.039551 168.966230 0.672234
8.045128 177.017170 0.687556
8.050705 187.583860 0.707258
8.056282 200.652020 0.730940
8.061859 215.767230 0.757414
8.067436 231.325040 0.783668
8.073013 245.338180 0.806462
8.078591 256.946530 0.824715
8.084168 263.058690 0.833854
8.089745 263.683290 0.834230
8.095323 258.896670 0.826018
8.100900 250.038960 0.811169
8.106477 240.414610 0.794822
8.112054 232.822920 0.781600
8.117632 228.473250 0.773698
8.123209 230.035290 0.775770
8.128786 238.573850 0.789460
8.134363 253.385680 0.813003
8.139940 276.158480 0.848132
8.145517 304.281520 0.889621
8.151094 333.658910 0.930898
8.156671 361.993870 0.968913
8.162250 383.902620 0.997076
8.167827 397.403720 1.013719
8.173404 399.931980 1.016199
8.178981 389.599430 1.002257
8.184558 368.288060 0.973751
8.190135 339.195190 0.933821
8.195712 306.972050 0.887714
8.201289 276.544590 0.841959
8.206867 248.982970 0.798322
8.212444 225.525710 0.759236
8.218021 206.800160 0.726507
8.223598 192.752620 0.700890
8.229176 182.619250 0.681725
8.234753 175.073790 0.667010
8.240330 170.294480 0.657368
8.245908 167.221820 0.650940
8.251485 165.832470 0.647762
8.257062 165.895650 0.647418
8.262639 167.886370 0.650822
8.268216 172.940090 0.660069
8.273793 180.911850 0.674625
8.279370 193.058560 0.696403
8.284947 209.418610 0.724789
8.290525 228.093660 0.755872
8.296102 248.283370 0.788049
8.301680 265.600010 0.814483
8.307257 275.413640 0.828798
8.312834 275.208440 0.827896
8.318411 265.756350 0.812971
8.323988 248.214050 0.785119
8.329565 227.092880 0.750435
8.335143 207.024350 0.715997
8.340720 188.623370 0.682948
8.346297 174.907750 0.657179
8.351874 165.340440 0.638497
8.357451 159.428960 0.626531
8.363029 155.384230 0.618091
8.368606 153.417720 0.613730
8.374184 152.790010 0.612036
8.379761 153.248840 0.612518
8.385338 154.525790 0.614627
8.390915 157.481600 0.620036
8.396492 160.790250 0.626070
8.402069 162.982380 0.629876
8.407646 163.718320 0.630848
8.413223 162.501190 0.628052
8.418801 159.068160 0.620942
8.424378 154.823320 0.612167
8.429956 151.580800 0.605293
8.435533 149.113920 0.599922
8.441110 147.440870 0.596125
8.446687 146.900130 0.594610
8.452264 146.603780 0.593590
8.457841 146.609760 0.593182
8.463419 146.663680 0.592872
8.468996 146.594880 0.592315
8.474573 146.364200 0.591431
8.480150 145.983050 0.590244
8.485727 145.766160 0.589390
8.491304 145.657580 0.588755
8.496882 145.727570 0.588482
8.502460 145.764360 0.588142
8.508037 145.944110 0.588091
8.513614 146.102630 0.587997
8.519191 145.910110 0.587197
8.524768 146.120640 0.587207
8.530345 146.245190 0.587046
8.535922 145.949360 0.586040
8.541499 145.979310 0.585690
8.547077 146.094790 0.585511
8.552654 146.124390 0.585160
8.558231 146.334290 0.585170
8.563808 146.570050 0.585232
8.569385 146.528660 0.584740
8.574963 146.486570 0.584248
8.580540 146.400740 0.583669
8.586117 146.393300 0.583247
8.591695 146.614730 0.583280
8.597272 146.830800 0.583303
8.602849 146.925920 0.583086
8.608426 146.949890 0.582727
8.614003 146.840700 0.582105
8.619580 146.964810 0.581946
8.625157 146.965790 0.581543
8.630734 146.773850 0.580760
8.636313 146.956160 0.580716
8.641890 147.040560 0.580480
8.647467 146.908620 0.579817
8.653044 147.158780 0.579908
8.658621 147.291310 0.579767
8.664198 147.170140 0.579127
8.669775 147.263460 0.578910
8.675353 147.422580 0.578821
8.680930 147.478780 0.578531
8.686507 147.693010 0.578551
8.692084 147.805270 0.578371
8.697661 147.771220 0.577905
8.703238 147.662020 0.577293
8.708816 147.772770 0.577111
8.714393 147.804500 0.576775
8.719971 147.845670 0.576458
8.725548 147.852840 0.576075
8.731125 148.069950 0.576101
8.736702 148.135480 0.575832
8.742279 148.263980 0.575686
8.747856 148.320210 0.575399
8.753433 148.397570 0.575154
8.759010 148.429210 0.574820
8.764588 148.570530 0.574699
8.770165 148.536940 0.574240
8.775742 148.673600 0.574110
8.781320 148.418950 0.573225
8.786897 148.179930 0.572371
8.792474 148.330810 0.572271
8.798051 148.470690 0.572149
8.803629 148.906570 0.572596
8.809206 149.338910 0.573035
8.814783 149.462140 0.572880
8.820360 149.696290 0.572937
8.825937 149.729340 0.572610
8.831514 149.697780 0.572159
8.837091 149.655620 0.571688
8.842669 149.603330 0.571199
8.848247 149.671970 0.570941
8.853824 149.739780 0.570682
8.859401 149.884290 0.570569
8.864978 150.221210 0.570821
8.870555 150.327510 0.570635
8.876132 150.635570 0.570832
8.881709 150.985610 0.571107
8.887286 150.800870 0.570370
8.892864 150.887770 0.570147
8.898441 150.803190 0.569601
8.904018 150.799160 0.569208
8.909596 151.252850 0.569677
8.915173 151.604030 0.569952
8.920750 152.015240 0.570339
8.926327 153.117450 0.572016
8.931905 154.122790 0.573502
8.937482 155.141240 0.575006
8.943059 156.345250 0.576843
8.948636 157.002470 0.577664
8.954213 156.701280 0.576720
8.959790 156.389790 0.575759
8.965367 155.496110 0.573724
8.970944 154.466280 0.571436
8.976522 153.682890 0.569602
8.982100 153.225890 0.568372
8.987677 153.044250 0.567653
8.993254 153.213150 0.567584
8.998831 153.053790 0.566908
9.004408 153.183000 0.566766
9.009985 153.111910 0.566255
9.015562 153.067110 0.565792
9.021140 153.207140 0.565671
9.026717 153.526790 0.565882
9.032294 153.834960 0.566070
9.037871 154.094250 0.566168
9.043448 154.197100 0.565978
9.049026 154.285640 0.565762
9.054603 154.223400 0.565269
9.060181 154.269240 0.564976
9.065758 154.554050 0.565119
9.071335 154.582960 0.564795
9.076912 154.761140 0.564744
9.082489 154.912860 0.564644
9.088066 154.939700 0.564316
9.093643 155.171220 0.564361
9.099220 155.675860 0.564902
9.104798 155.894420 0.564922
9.110375 156.066940 0.564859
9.115953 156.160190 0.564652
9.121530 156.373670 0.564662
9.127107 156.618330 0.564729
9.132684 156.959750 0.564968
9.138261 157.291980 0.565191
9.143838 157.721120 0.565586
9.149416 158.074490 0.565844
9.154993 158.508930 0.566245
9.160570 159.046260 0.566829
9.166147 159.481860 0.567229
9.171724 159.874480 0.567551
9.177301 159.845520 0.567124
9.182878 159.908100 0.566860
9.188456 160.426250 0.567403
9.194034 160.745850 0.567593
9.199611 161.429700 0.568423
9.205188 162.141690 0.569300
9.210765 162.573100 0.569681
9.216342 163.029300 0.570103
9.221919 163.564730 0.570663
9.227496 164.084870 0.571193
9.233074 165.073430 0.572534
9.238651 166.239990 0.574175
9.244228 167.448760 0.575880
9.249806 168.666280 0.577590
9.255382 169.765470 0.579089
9.260960 170.631230 0.580182
9.266537 171.210340 0.580784
9.272114 172.099300 0.581908
9.277692 172.976930 0.583008
9.283269 174.122470 0.584552
9.288846 175.426010 0.586351
9.294423 177.419540 0.589287
9.300000 179.876190 0.592965
9.305577 182.575450 0.597007
9.311154 185.986110 0.602163
9.316732 189.617840 0.607616
9.322309 193.976620 0.614159
9.327887 199.366490 0.622227
9.333464 205.824200 0.631811
9.339041 213.978640 0.643785
9.344618 224.324800 0.658736
9.350195 237.370100 0.677177
9.355772 254.145030 0.700240
9.361350 277.463590 0.731184
9.366927 310.709410 0.773246
9.372504 357.234410 0.828581
9.378081 423.319760 0.901384
9.383658 521.062990 0.999398
9.389235 659.958440 1.124008
9.394813 848.105650 1.273368
9.400390 1079.758800 1.435855
9.405968 1364.815700 1.613252
9.411545 1676.729100 1.786961
9.417122 1960.345100 1.930938
9.422699 2176.092300 2.033103
9.428276 2297.121300 2.087523
9.433853 2281.823700 2.079214
9.439430 2142.527300 2.013448
9.445008 1903.873800 1.896773
9.450585 1598.583900 1.736933
9.456162 1284.291700 1.555846
9.461740 1008.772800 1.378005
9.467317 787.007140 1.216363
9.472894 610.910030 1.070982
9.478471 483.790620 0.952450
9.484048 399.659700 0.865124
9.489626 341.640050 0.799352
9.495203 300.645360 0.749378
9.500780 271.341580 0.711463
9.506357 250.886800 0.683681
9.511934 235.761800 0.662326
9.517511 223.719540 0.644775
9.523089 214.655810 0.631173
9.528666 207.882170 0.620735
9.534244 202.960210 0.612949
9.539821 200.040510 0.608134
9.545398 199.030300 0.606207
9.550975 200.721240 0.608386
9.556552 206.318040 0.616415
9.562129 212.833510 0.625671
9.567706 220.841580 0.636925
9.573284 228.637590 0.647655
9.578861 230.113010 0.649326
9.584438 226.535980 0.643847
9.590015 219.199080 0.632930
9.595593 207.416110 0.615291
9.601170 195.914280 0.597606
9.606747 186.647520 0.582929
9.612324 180.617550 0.573069
9.617902 176.423510 0.566016
9.623479 174.253280 0.562165
9.629056 172.837890 0.559520
9.634633 172.070820 0.557922
9.640210 171.360080 0.556414
9.645787 171.008100 0.555488
9.651364 170.606090 0.554482
9.656941 170.295990 0.553626
9.662520 170.253370 0.553205
9.668097 170.243910 0.552838
9.673674 170.210170 0.552432
9.679251 169.938190 0.551640
9.684828 169.699260 0.550903
9.690405 169.571530 0.550346
9.695982 169.413440 0.549741
9.701559 169.398940 0.549369
9.707137 169.482590 0.549157
9.712714 169.542270 0.548906
9.718291 169.478160 0.548454
9.723868 169.460420 0.548079
9.729446 169.424590 0.547674
9.735022 169.162640 0.546905
9.740600 169.216110 0.546646
9.746178 168.957050 0.545882
9.751755 169.122510 0.545805
9.757332 169.361340 0.545846
9.762909 169.549320 0.545804
9.768486 169.794300 0.545854
9.774063 170.084790 0.545976
9.779640 170.142530 0.545725
9.785217 170.300920 0.545635
9.790795 170.309010 0.545305
9.796372 170.740880 0.545653
9.801949 171.342070 0.546269
9.807527 171.682370 0.546467
9.813104 171.976930 0.546592
9.818681 172.305050 0.546770
9.824258 172.254850 0.546347
9.829835 172.451900 0.546316
9.835413 172.583760 0.546182
9.840990 172.974730 0.546458
9.846567 173.459470 0.546880
9.852144 174.027760 0.547432
9.857721 174.509060 0.547845
9.863298 175.040450 0.548335
9.868875 175.470750 0.548666
9.874453 175.978790 0.549116
9.880031 176.594920 0.549732
9.885608 177.387510 0.550620
9.891185 178.152270 0.551461
9.896762 179.056550 0.552514
9.902339 180.291400 0.554070
9.907916 181.798680 0.556034
9.913493 183.401730 0.558132
9.919071 185.179120 0.560480
9.924648 187.473820 0.563591
9.930225 190.362270 0.567562
9.935802 193.993070 0.572593
9.941380 198.339000 0.578611
9.946957 204.390870 0.587006
9.952534 211.870450 0.597279
9.958111 220.637700 0.609133
9.963689 231.016620 0.622908
9.969266 243.151500 0.638661
9.974843 255.921300 0.654811
9.980420 267.523440 0.669074
9.985997 277.397490 0.680887
9.991574 284.437320 0.689045
9.997151 287.572630 0.692403
10.002729 287.444640 0.691820
10.008307 284.529480 0.687876
10.013884 280.582980 0.682666
10.019461 277.157320 0.678066
10.025038 276.649230 0.677026
10.030615 280.833620 0.681705
10.036192 292.646940 0.695465
10.041769 314.673250 0.720717
10.047347 350.030030 0.759660
10.052924 408.294890 0.819946
10.058501 495.230040 0.902472
10.064078 611.707760 1.002385
10.069655 756.134950 1.113767
10.075233 921.366940 1.228692
10.080810 1092.430400 1.337076
10.086387 1237.166100 1.422020
10.091965 1329.453700 1.473197
10.097542 1361.138400 1.489732
10.103119 1331.408600 1.472466
10.108696 1258.698700 1.430815
10.114273 1161.293500 1.373493
10.119850 1058.771900 1.310660
10.125427 964.765990 1.250354
10.131005 886.244020 1.197655
10.136582 820.085390 1.151379
10.142159 756.353700 1.105057
10.147737 688.615110 1.053765
10.153314 622.154600 1.001010
10.158891 557.810490 0.947254
10.164468 495.322600 0.892075
10.170045 441.877960 0.842059
10.175623 401.083650 0.801757
10.181200 372.390320 0.772074
10.186777 355.252230 0.753637
10.192354 348.924530 0.746439
10.197931 352.547550 0.749845
10.203508 365.354550 0.762878
10.209085 386.238310 0.783899
10.214663 412.632540 0.809746
10.220241 441.552700 0.837131
10.225818 471.843570 0.864841
10.231395 502.591280 0.892031
10.236972 531.650270 0.916897
10.242549 557.834590 0.938633
10.248126 581.898500 0.958081
10.253703 604.709230 0.976084
10.259281 622.238100 0.989527
10.264858 633.161130 0.997568
10.270435 636.330870 0.999454
10.276012 628.951420 0.993038
10.281590 611.725340 0.978749
10.287167 584.720760 0.956321
10.292744 548.054870 0.925289
10.298321 503.727290 0.886543
10.303899 457.563140 0.844430
10.309476 412.831790 0.801607
10.315053 368.811430 0.757205
10.320630 329.492130 0.715271
10.326207 298.179840 0.680024
10.331784 273.138730 0.650450
10.337361 253.292470 0.625994
10.342938 238.077710 0.606535
10.348516 226.769810 0.591597
10.354094 218.489380 0.580345
10.359671 211.810290 0.571060
10.365248 206.505550 0.563523
10.370825 202.530120 0.557735
10.376402 199.328410 0.552975
10.381979 196.525790 0.548743
10.387557 194.212080 0.545174
10.393134 192.147170 0.541941
10.398711 190.710330 0.539585
10.404288 189.259080 0.537204
10.409865 188.067550 0.535188
10.415442 187.484440 0.534036
10.421020 186.851390 0.532813
10.426597 186.038250 0.531332
10.432175 185.456330 0.530181
10.437752 184.782150 0.528898
10.443329 184.206450 0.527756
10.448906 183.500210 0.526427
10.454483 183.074620 0.525501
10.460060 182.783460 0.524767
10.465637 182.521840 0.524077
10.471214 182.247180 0.523368
10.476792 182.243060 0.523048
10.482369 182.205510 0.522681
10.487947 182.070620 0.522174
10.493524 182.398240 0.522330
10.499101 182.841640 0.522652
10.504678 183.330140 0.523036
10.510255 184.453890 0.524323
10.515833 185.383790 0.525328
10.521410 186.025700 0.525922
10.526987 186.515580 0.526299
10.532564 186.224370 0.525574
10.538141 185.723560 0.524553
10.543718 184.651090 0.522724
10.549295 183.272170 0.520458
10.554873 182.643520 0.519254
10.560451 182.432740 0.518645
10.566028 182.975800 0.519106
10.571605 185.151960 0.521873
10.577182 189.212880 0.527250
10.582759 194.035160 0.533609
10.588336 199.649580 0.540951
10.593913 205.690580 0.548747
10.599490 209.731170 0.553781
10.605068 210.712300 0.554745
10.610645 208.909970 0.552039
10.616222 203.747670 0.544851
10.621799 197.344060 0.535902
10.627377 191.466950 0.527548
10.632954 186.827480 0.520808
10.638531 184.192370 0.516815
10.644109 182.655180 0.514348
10.649686 181.918670 0.513006
10.655263 181.709560 0.512407
10.660840 181.803050 0.512235
10.666417 181.757660 0.511867
10.671994 181.755250 0.511560
10.677571 181.925860 0.511497
10.683148 182.096050 0.511433
10.688726 182.188110 0.511260
10.694304 182.180830 0.510947
10.699881 182.134000 0.510579
10.705458 182.161100 0.510315
10.711035 182.209290 0.510081
10.716612 182.405850 0.510054
10.722189 182.662900 0.510112
10.727766 182.797500 0.509999
10.733344 182.932190 0.509885
10.738921 183.365920 0.510188
10.744498 183.481110 0.510047
10.750075 183.708150 0.510062
10.755652 183.825910 0.509924
10.761230 183.971310 0.509825
10.766807 184.529140 0.510297
10.772384 184.990490 0.510633
10.777962 185.508870 0.511047
10.783539 186.128310 0.511598
10.789116 186.848040 0.512285
10.794693 188.478130 0.514212
10.800270 192.280520 0.519068
10.805847 199.352450 0.528216
10.811424 210.300690 0.542208
10.817002 227.815280 0.564004
10.822579 243.163670 0.582351
10.828156 259.131130 0.600814
10.833734 271.454010 0.614573
10.839311 273.117740 0.616092
10.844888 266.908660 0.608691
10.850465 254.455400 0.593973
10.856042 236.759580 0.572611
10.861620 220.373600 0.552117
10.867197 209.056320 0.537439
10.872774 201.944900 0.527909
10.878351 196.737490 0.520753
10.883928 195.431380 0.518718
10.889505 195.320220 0.518267
10.895082 195.985930 0.518846
10.900660 196.888460 0.519735
10.906238 197.997850 0.520893
10.911815 199.167770 0.522124
10.917392 200.886860 0.524066
10.922969 202.698590 0.526117
10.928546 205.038960 0.528837
10.934123 207.814190 0.532093
10.939700 211.334490 0.536268
10.945278 215.431320 0.541125
10.950855 220.329650 0.546923
10.956432 226.356990 0.554030
10.962009 234.093570 0.563090
10.967587 244.710340 0.575382
10.973164 258.218870 0.590706
10.978741 275.745330 0.610068
10.984318 301.816380 0.637886
10.989896 334.254390 0.670900
10.995473 374.888430 0.710096
11.001050 429.008180 0.759183
11.006627 495.205540 0.815181
11.012204 570.319700 0.874315
11.017781 648.443970 0.931736
11.023358 721.788450 0.982447
11.028935 787.680110 1.025716
11.034513 829.441280 1.051944
11.040091 841.291320 1.058817
11.045668 821.671570 1.045791
11.051245 773.665950 1.014193
11.056822 707.254030 0.969125
11.062399 630.858460 0.914758
11.067976 553.734010 0.856524
11.073554 480.292600 0.797242
11.079131 421.069920 0.746041
11.084708 377.102020 0.705608
11.090285 342.231290 0.671804
11.095862 317.449620 0.646650
11.101439 302.199280 0.630561
11.107017 293.404390 0.620959
11.112594 290.452510 0.617470
11.118172 293.511140 0.620354
11.123749 302.527800 0.629447
11.129326 318.454530 0.645430
11.134903 345.782470 0.672166
11.140480 386.053380 0.709819
11.146057 440.919190 0.758146
11.151634 518.887150 0.821976
11.157211 620.321110 0.898216
11.162789 737.299500 0.978687
11.168366 865.457520 1.059728
11.173944 985.257320 1.130046
11.179521 1086.564700 1.186039
11.185098 1146.260100 1.217482
11.190675 1151.555100 1.219589
11.196252 1102.744600 1.192775
11.201830 1008.986300 1.140286
11.207407 891.888550 1.071462
11.212984 764.812130 0.991629
11.218561 647.964540 0.912216
11.224138 546.370180 0.837174
11.229715 469.828340 0.775876
11.235292 419.754120 0.732944
11.240870 387.207370 0.703551
11.246448 371.082210 0.688350
11.252025 368.564880 0.685618
11.257602 376.486570 0.692550
11.263179 394.585940 0.708594
11.268756 420.552610 0.731119
11.274333 454.481200 0.759603
11.279910 495.664700 0.792819
11.285487 546.678410 0.832141
11.291065 603.148320 0.873563
11.296642 657.713500 0.911700
11.302219 709.879700 0.946624
11.307796 750.667850 0.972883
11.313374 773.065800 0.986725
11.318951 776.420960 0.988299
11.324528 762.662780 0.978943
11.330106 739.173400 0.963199
11.335683 715.331180 0.946996
11.341260 701.531250 0.937281
11.346837 701.365780 0.936636
11.352414 717.330570 0.946695
11.357991 743.435490 0.963217
11.363568 772.854550 0.981529
11.369145 797.044680 0.996203
11.374723 807.378230 1.002068
11.380301 797.604190 0.995416
11.385878 768.038700 0.976236
11.391455 719.007450 0.944023
11.397032 654.979060 0.900497
11.402609 589.334530 0.853693
11.408186 522.233400 0.803167
11.413763 457.556490 0.751361
11.419341 404.611180 0.706152
11.424918 359.672180 0.665404
11.430495 325.038640 0.632197
11.436072 297.196350 0.604170
11.441649 275.015870 0.580857
11.447227 259.359650 0.563761
11.452804 246.937940 0.549782
11.458382 237.045380 0.538351
11.463959 229.640010 0.529575
11.469536 223.721800 0.522409
11.475113 219.493710 0.517155
11.480690 216.546800 0.513381
11.486267 215.222930 0.511518
11.491844 215.424410 0.511468
11.497421 216.488340 0.512438
11.502999 217.420720 0.513249
11.508576 218.112290 0.513774
11.514153 217.533360 0.512801
11.519731 214.138520 0.508495
11.525308 210.138870 0.503439
11.530885 205.398990 0.497447
11.536462 200.831390 0.491606
11.542039 197.367430 0.487072
11.547617 194.966890 0.483827
11.553194 193.579500 0.481830
11.558771 192.530120 0.480250
11.564348 191.529140 0.478730
11.569925 191.261110 0.478124
11.575502 190.784530 0.477258
11.581079 190.304080 0.476388
11.586658 189.956510 0.475683
11.592235 189.519840 0.474868
11.597812 188.921970 0.473851
11.603389 188.534820 0.473098
11.608966 188.139360 0.472335
11.614543 187.578640 0.471364
11.620120 187.279240 0.470722
11.625697 187.149150 0.470293
11.631275 186.921250 0.469742
11.636852 186.713470 0.469216
11.642429 186.533620 0.468726
11.648006 186.354370 0.468237
11.653584 186.110980 0.467667
11.659161 185.837070 0.467060
11.664738 185.730880 0.466664
11.670315 185.440410 0.466036
11.675893 185.169560 0.465433
11.681470 184.996220 0.464954
11.687047 184.764300 0.464401
11.692624 184.316040 0.463576
11.698201 184.179990 0.463145
11.703778 184.079540 0.462758
11.709355 183.965150 0.462355
11.714933 183.762820 0.461841
11.720510 183.692410 0.461493
11.726088 183.673690 0.461210
11.731665 183.547610 0.460793
11.737242 183.745100 0.460782
11.742819 183.761060 0.460543
11.748396 183.601810 0.460086
11.753973 183.382690 0.459553
11.759551 182.977390 0.458787
11.765128 182.617780 0.458079
11.770705 182.420720 0.457576
11.776282 182.303700 0.457172
11.781859 182.428630 0.457073
11.787436 182.526700 0.456940
11.793014 182.377210 0.456497
11.798591 182.218120 0.456042
11.804169 182.025410 0.455546
11.809746 181.876630 0.455105
11.815323 181.720310 0.454654
11.820900 181.428280 0.454035
11.826477 181.340790 0.453671
11.832054 181.141480 0.453169
11.837631 180.986950 0.452722
11.843208 181.017430 0.452507
11.848786 180.907910 0.452117
11.854363 180.701900 0.451607
11.859941 180.582370 0.451206
11.865518 180.335830 0.450646
11.871095 180.232250 0.450265
11.876672 180.386640 0.450206
11.882249 180.314970 0.449865
11.887827 180.400440 0.449721
11.893404 180.474010 0.449562
11.898981 180.361050 0.449170
11.904558 180.122060 0.448622
11.910135 180.072430 0.448310
11.915712 179.890270 0.447834
11.921289 179.695100 0.447341
11.926867 179.642270 0.447026
11.932445 179.496550 0.446596
11.938022 179.425090 0.446258
11.943599 179.356670 0.445925
11.949176 179.008650 0.445244
11.954753 178.908430 0.444872
11.960330 178.922440 0.444641
11.965907 178.875640 0.444336
11.971484 178.939500 0.444168
11.977062 179.055370 0.444065
11.982639 179.127380 0.443907
11.988216 178.798540 0.443253
11.993793 178.712100 0.442899
11.999371 178.648560 0.442574
12.004948 178.364240 0.441976
12.010525 178.226330 0.441560
12.016103 178.223940 0.441312
12.021680 178.208360 0.441047
12.027257 178.135910 0.440713
12.032834 178.046110 0.440357
12.038411 177.955860 0.440001
12.043988 177.650390 0.439379
12.049565 177.249070 0.438639
12.055142 176.918580 0.437987
12.060720 176.851240 0.437661
12.066298 176.742030 0.437283
12.071875 176.918690 0.437259
12.077452 176.794970 0.436864
12.083029 176.642000 0.436433
12.088606 176.578310 0.436112
12.094183 176.316440 0.435547
12.099760 176.447560 0.435468
12.105338 176.470050 0.435254
12.110915 176.097750 0.434554
12.116492 176.052490 0.434258
12.122069 175.982010 0.433931
12.127646 175.975170 0.433682
12.133224 176.262990 0.433796
12.138801 176.254610 0.433546
12.144379 176.269450 0.433324
12.149956 176.035640 0.432798
12.155533 175.867190 0.432351
12.161110 175.797810 0.432027
12.166687 175.693700 0.431660
12.172264 175.726970 0.431463
12.177841 176.005580 0.431566
12.183418 175.711170 0.430967
12.188996 175.777220 0.430809
12.194573 175.780430 0.430575
12.200150 175.532870 0.430035
12.205728 175.602770 0.429883
12.211305 175.625890 0.429674
12.216882 175.650270 0.429466
12.222459 175.627010 0.429201
12.228036 175.527010 0.428842
12.233614 175.696080 0.428812
12.239191 175.580570 0.428434
12.244768 175.337750 0.427902
12.250345 175.337420 0.427666
12.255922 175.238460 0.427309
12.261499 175.190290 0.427015
12.267076 175.170670 0.426756
12.272655 175.235670 0.426600
12.278232 175.190000 0.426309
12.283809 175.169100 0.426049
12.289386 175.073850 0.425698
12.294963 175.340330 0.425788
12.300540 175.425480 0.425656
12.306117 175.495700 0.425507
12.311694 175.766600 0.425601
12.317272 175.758760 0.425357
12.322849 175.693280 0.425044
12.328426 175.740570 0.424867
12.334003 175.493130 0.424335
12.339581 175.274980 0.423838
12.345158 175.277310 0.423607
12.350735 175.033290 0.423080
12.356312 174.878250 0.422660
12.361890 175.067540 0.422656
12.367467 175.205780 0.422590
12.373044 175.033750 0.422151
12.378621 175.316560 0.422259
12.384198 175.583540 0.422349
12.389775 175.615310 0.422155
12.395352 175.806270 0.422152
12.400930 176.160280 0.422345
12.406507 176.227460 0.422194
12.412085 176.470600 0.422253
12.417662 176.851910 0.422477
12.423239 177.045850 0.422476
12.428816 177.565890 0.422864
12.434393 178.007000 0.423157
12.439970 178.435850 0.423434
12.445548 179.206590 0.424114
12.451125 179.837600 0.424627
12.456702 180.452620 0.425119
12.462279 181.115540 0.425666
12.467856 182.019360 0.426493
12.473433 183.004070 0.427410
12.479011 184.662230 0.429107
12.484588 186.983230 0.431559
12.490166 189.708940 0.434455
12.495743 193.028230 0.437999
12.501320 197.101760 0.442354
12.506897 201.925960 0.447489
12.512474 207.427890 0.453296
12.518051 213.795150 0.459949
12.523628 221.329560 0.467727
12.529206 228.937550 0.475437
12.534783 236.085010 0.482538
12.540360 242.643920 0.488927
12.545938 247.494050 0.493519
12.551515 250.415880 0.496152
12.557092 251.623050 0.497074
12.562669 251.473390 0.496654
12.568246 251.568570 0.496476
12.573824 253.031200 0.497645
12.579401 256.276000 0.500552
12.584978 263.220890 0.507011
12.590555 274.579930 0.517552
12.596132 290.098360 0.531686
12.601709 311.533050 0.550677
12.607286 339.082370 0.574196
12.612864 370.511600 0.599889
12.618442 404.890900 0.626760
12.624019 439.021330 0.652286
12.629596 474.056880 0.677443
12.635173 504.062010 0.698172
12.640750 527.159850 0.713599
12.646327 545.975770 0.725826
12.651904 559.985350 0.734677
12.657482 571.243160 0.741620
12.663059 581.057070 0.747555
12.668636 590.143800 0.752966
12.674213 598.975340 0.758165
12.679790 605.471130 0.761849
12.685368 609.110470 0.763718
12.690945 609.039610 0.763256
12.696522 605.456420 0.760592
12.702100 599.870120 0.756662
12.707677 594.478210 0.752843
12.713254 593.489200 0.751806
12.718831 598.743350 0.754714
12.724408 611.506290 0.762300
12.729985 630.033810 0.773339
12.735562 651.310670 0.785860
12.741139 667.028380 0.794852
12.746717 673.509770 0.798269
12.752295 665.178590 0.792884
12.757872 640.685910 0.777725
12.763449 603.164430 0.754196
12.769026 555.144590 0.723157
12.774603 501.537410 0.686981
12.780180 445.142120 0.646853
12.785758 395.246250 0.609190
12.791335 352.861270 0.575287
12.796912 314.988280 0.543241
12.802489 286.937410 0.518206
12.808066 264.893460 0.497631
12.813643 248.273300 0.481505
12.819221 236.065920 0.469262
12.824798 225.978090 0.458876
12.830376 218.977520 0.451466
12.835953 213.469380 0.445509
12.841530 208.467880 0.440019
12.847107 204.801320 0.435895
12.852684 201.810550 0.432465
12.858261 199.309560 0.429543
12.863838 197.349010 0.427192
12.869415 196.213330 0.425729
12.874993 195.653340 0.424889
12.880570 195.850420 0.424872
12.886147 197.404370 0.426322
12.891725 199.990360 0.428872
12.897302 203.965940 0.432878
12.902879 210.054600 0.439052
12.908456 217.592530 0.446617
12.914033 226.736070 0.455656
12.919611 237.453570 0.466047
12.925188 249.457860 0.477422
12.930765 262.789920 0.489747
12.936342 276.167630 0.501785
12.941919 291.027950 0.514828
12.947496 308.506620 0.529774
12.953074 326.790650 0.544950
12.958652 348.102780 0.562133
12.964229 371.183500 0.580154
12.969806 394.666110 0.597899
12.975383 415.833740 0.613389
12.980960 432.125610 0.624949
12.986537 443.155400 0.632531
12.992114 448.362520 0.635890
12.997691 448.629490 0.635733
13.003269 444.895690 0.632738
13.008846 438.042690 0.627504
13.014423 429.338290 0.620900
13.020000 419.233180 0.613216
13.025578 406.972780 0.603854
13.031155 391.859990 0.592214
13.036732 374.081240 0.578309
13.042309 354.074370 0.562325
13.047887 331.821350 0.544072
13.053464 307.069150 0.523102
13.059041 284.476840 0.503217
13.064618 263.490880 0.484037
13.070195 244.669480 0.466175
13.075772 229.177670 0.450930
13.081349 216.687090 0.438231
13.086927 208.173660 0.429303
13.092505 202.401090 0.423078
13.098082 200.298080 0.420646
13.103659 200.537540 0.420668
13.109236 203.645580 0.423685
13.114813 204.147750 0.423976
13.120390 203.109310 0.422667
13.125967 200.543080 0.419760
13.131545 193.299320 0.411885
13.137122 185.809710 0.403607
13.142699 179.462770 0.396438
13.148276 173.450290 0.389529
13.153853 168.996900 0.384287
13.159431 166.011120 0.380670
13.165008 164.323900 0.378524
13.170585 163.173570 0.376992
13.176163 162.135650 0.375587
13.181740 161.354250 0.374477
13.187317 160.548770 0.373338
13.192894 159.831160 0.372300
13.198471 159.380920 0.371573
13.204048 158.790010 0.370682
13.209625 158.623180 0.370286
13.215203 158.399090 0.369823
13.220780 157.819550 0.368945
13.226357 157.462550 0.368327
13.231935 157.122500 0.367729
13.237512 156.710420 0.367047
13.243089 156.494800 0.366595
13.248666 156.287510 0.366153
13.254243 156.114590 0.365751
13.259821 155.889790 0.365289
13.265398 155.871370 0.365069
13.270975 155.717070 0.364689
13.276552 155.319470 0.364025
13.282129 155.109510 0.363582
13.287706 154.774990 0.362992
13.293283 154.447020 0.362410
13.298861 154.588780 0.362379
13.304439 154.290240 0.361832
13.310016 154.002790 0.361298
13.315593 153.943240 0.361031
13.321170 153.721820 0.360575
13.326747 153.403750 0.360006
13.332324 153.213120 0.359587
13.337901 152.974760 0.359111
13.343479 152.765640 0.358671
13.349056 152.458190 0.358114
13.354633 152.373250 0.357820
13.360210 152.292180 0.357530
13.365788 152.090000 0.357098
13.371365 152.196350 0.357029
13.376942 152.200730 0.356839
13.382519 152.197540 0.356641
13.388097 152.121490 0.356358
13.393674 151.951260 0.355965
13.399251 151.921600 0.355736
13.404828 151.996060 0.355630
13.410405 152.224660 0.355703
13.415982 152.623150 0.355975
13.421559 153.223740 0.356480
13.427136 153.770140 0.356921
13.432714 154.180440 0.357202
13.438292 154.414630 0.357278
13.443869 154.095250 0.356714
13.449446 153.800480 0.356179
13.455023 153.003920 0.355062
13.460600 152.493940 0.354276
13.466177 152.101580 0.353628
13.471755 151.640150 0.352898
13.477332 151.358890 0.352379
13.482909 151.276580 0.352091
13.488486 151.203960 0.351815
13.494063 151.274340 0.351705
13.499640 151.260500 0.351497
13.505218 151.384550 0.351449
13.510795 151.307540 0.351168
13.516373 151.129390 0.350770
13.521950 151.188420 0.350647
13.527527 151.231860 0.350507
13.533104 151.214370 0.350295
13.538681 151.570390 0.350516
13.544258 151.740370 0.350521
13.549835 151.991880 0.350620
13.555412 152.508680 0.351024
13.560990 152.888520 0.351269
13.566567 153.392680 0.351656
13.572145 153.938750 0.352089
13.577722 154.383270 0.352404
13.583299 155.256120 0.353206
13.588876 156.094680 0.353965
13.594453 156.999370 0.354796
13.600031 158.326250 0.356097
13.605608 159.639180 0.357376
13.611185 161.635800 0.359407
13.616762 164.282300 0.362140
13.622339 167.581180 0.365558
13.627916 171.829100 0.369960
13.633493 177.217860 0.375511
13.639071 184.678540 0.383124
13.644649 195.247480 0.393719
13.650226 210.052000 0.408150
13.655803 229.968440 0.426828
13.661380 259.457180 0.453121
13.666957 298.941800 0.486112
13.672534 346.186830 0.522831
13.678111 403.701230 0.564285
13.683688 469.964080 0.608503
13.689266 538.149480 0.650795
13.694843 599.890560 0.686738
13.700420 646.979370 0.712791
13.705997 674.355350 0.727317
13.711575 674.470400 0.726981
13.717152 649.786930 0.713163
13.722729 601.867190 0.685987
13.728307 539.308530 0.649002
13.733884 472.389470 0.607071
13.739461 409.495150 0.564906
13.745038 354.769840 0.525517
13.750615 309.250820 0.490378
13.756192 276.833100 0.463710
13.761769 254.475780 0.444347
13.767346 238.926710 0.430322
13.772924 229.110280 0.421158
13.778502 223.054890 0.415327
13.784079 218.439500 0.410782
13.789656 214.280210 0.406629
13.795233 210.003710 0.402330
13.800810 205.179150 0.397463
13.806387 199.842680 0.392045
13.811964 193.950130 0.386010
13.817542 188.236100 0.380072
13.823119 182.746290 0.374283
13.828696 177.496410 0.368665
13.834273 172.435470 0.363171
13.839850 167.795590 0.358055
13.845428 164.168140 0.353969
13.851005 161.288010 0.350657
13.856583 159.558750 0.348580
13.862160 159.668610 0.348509
13.867737 160.305760 0.349011
13.873314 161.713000 0.350347
13.878891 163.635240 0.352229
13.884468 165.377240 0.353904
13.890045 164.933940 0.353234
13.895622 163.224490 0.351206
13.901200 160.172640 0.347715
13.906777 155.778870 0.342724
13.912354 152.102950 0.338469
13.917932 149.007840 0.334823
13.923509 146.956670 0.332327
13.929086 145.447970 0.330435
13.934663 144.439590 0.329105
13.940240 143.788760 0.328182
13.945818 143.280330 0.327420
13.951395 142.880140 0.326782
13.956972 142.633820 0.326320
13.962549 142.180860 0.325622
13.968126 142.035280 0.325275
13.973703 141.760670 0.324781
13.979280 141.416440 0.324207
13.984858 141.387970 0.323995
13.990436 141.140630 0.323532
13.996013 141.074510 0.323278
14.001590 141.109340 0.323139
14.007167 140.705610 0.322497
14.012744 140.748030 0.322367
14.018321 140.477650 0.321879
14.023898 140.152180 0.321328
14.029476 140.200560 0.321205
14.035053 140.207340 0.321035
14.040630 139.992400 0.320611
14.046207 140.130950 0.320592
14.051785 140.115050 0.320396
14.057362 140.003430 0.320090
14.062939 140.152890 0.320083
14.068516 140.060170 0.319800
14.074094 140.038530 0.319597
14.079671 139.979340 0.319352
14.085248 139.664890 0.318816
14.090825 139.716870 0.318698
14.096402 139.539490 0.318319
14.101979 139.468260 0.318061
14.107556 139.811830 0.318275
14.113133 139.751190 0.318029
14.118711 140.145540 0.318300
14.124289 140.462910 0.318482
14.129866 140.701230 0.318575
14.135443 140.997240 0.318732
14.141020 141.039690 0.318602
14.146597 141.310730 0.318730
14.152174 141.605580 0.318885
14.157752 142.105760 0.319269
14.163329 142.904860 0.319987
14.168906 143.679410 0.320674
14.174483 144.841280 0.321788
14.180060 146.134250 0.323040
14.185637 147.878680 0.324781
14.191215 150.242950 0.327184
14.196792 152.943130 0.329926
14.202370 156.524220 0.333579
14.207947 161.817960 0.338984
14.213524 168.761550 0.345986
14.219101 177.683040 0.354815
14.224678 189.366580 0.366089
14.230255 203.842960 0.379612
14.235832 220.000670 0.394149
14.241409 237.042770 0.408900
14.246987 253.313000 0.422463
14.252564 266.741270 0.433273
14.258142 274.852910 0.439564
14.263719 276.837280 0.440900
14.269296 272.080290 0.436850
14.274873 261.403080 0.427952
14.280450 247.126590 0.415867
14.286028 230.895320 0.401752
14.291605 214.197690 0.386735
14.297182 199.105060 0.372651
14.302759 187.049740 0.360990
14.308336 177.444500 0.351401
14.313913 169.909910 0.343665
14.319490 164.764480 0.338231
14.325068 161.372100 0.334542
14.330646 159.368850 0.332271
14.336223 159.023670 0.331723
14.341800 159.842760 0.332389
14.347377 161.827220 0.334256
14.352954 165.458570 0.337795
14.358531 171.050950 0.343261
14.364108 179.272050 0.351214
14.369685 190.475620 0.361818
14.375263 205.136110 0.375271
14.380840 224.864670 0.392679
14.386417 244.724530 0.409420
14.391994 264.361720 0.425288
14.397572 283.325380 0.440028
14.403149 298.527560 0.451422
14.408726 308.277220 0.458474
14.414304 313.913910 0.462383
14.419881 314.745570 0.462732
14.425458 308.784880 0.458068
14.431035 298.543090 0.450151
14.436612 284.069980 0.438854
14.442189 266.475800 0.424803
14.447766 247.915480 0.409509
14.453343 229.717320 0.393967
14.458921 212.223430 0.378453
14.464499 197.199910 0.364603
14.470076 184.691730 0.352649
14.475653 174.637760 0.342720
14.481230 166.502410 0.334450
14.486807 160.345280 0.328020
14.492384 155.549160 0.322892
14.497961 151.440320 0.318416
14.503539 148.262500 0.314877
14.509116 145.650890 0.311912
14.514693 143.508530 0.309432
14.520270 141.905590 0.307522
14.525847 140.691420 0.306028
14.531425 139.719360 0.304793
14.537002 138.918960 0.303744
14.542580 138.261430 0.302850
14.548157 137.584200 0.301933
14.553734 136.982390 0.301098
14.559311 136.436650 0.300325
14.564888 136.022960 0.299696
14.570465 135.479460 0.298924
14.576042 135.296860 0.298550
14.581619 134.890150 0.297928
14.587197 134.420350 0.297237
14.592774 134.316010 0.296949
14.598351 134.095690 0.296534
14.603929 133.978500 0.296232
14.609506 133.937380 0.296015
14.615083 133.751860 0.295638
14.620660 133.606110 0.295305
14.626237 133.694930 0.295231
14.631815 133.809590 0.295186
14.637392 133.946610 0.295165
14.642969 133.937740 0.294984
14.648546 133.833480 0.294697
14.654123 133.810090 0.294499
14.659700 133.959000 0.294491
14.665277 134.022090 0.294388
14.670856 134.275530 0.294494
14.676433 134.522160 0.294592
14.682010 134.692780 0.294606
14.687587 134.949620 0.294714
14.693164 135.253340 0.294872
14.698741 135.584200 0.295060
14.704318 136.132920 0.295482
14.709895 136.616650 0.295833
14.715473 137.141420 0.296226
14.721050 137.735670 0.296693
14.726627 138.355010 0.297184
14.732204 139.327610 0.298051
14.737782 140.549190 0.299178
14.743359 141.954220 0.300492
14.748936 143.692280 0.302147
14.754513 145.789890 0.304165
14.760091 148.327410 0.306619
14.765668 151.580950 0.309780
14.771245 155.839860 0.313915
14.776822 161.445650 0.319322
14.782399 168.465130 0.325996
14.787976 177.706590 0.334619
14.793553 190.037630 0.345828
14.799131 205.349850 0.359277
14.804708 223.827470 0.374869
14.810286 246.703660 0.393325
14.815863 273.235780 0.413688
14.821440 300.857450 0.433836
14.827017 328.761290 0.453237
14.832594 354.080410 0.470085
14.838171 373.777890 0.482694
14.843749 385.293850 0.489779
14.849326 387.395690 0.490818
14.854903 380.552730 0.486172
14.860480 367.354220 0.477379
14.866057 350.252870 0.465855
14.871634 332.742130 0.453787
14.877212 317.814510 0.443223
14.882789 308.047180 0.436096
14.888367 304.006530 0.432965
14.893944 306.203460 0.434264
14.899521 313.238010 0.438958
14.905098 322.659030 0.445240
14.910675 333.535950 0.452407
14.916252 343.820070 0.459050
14.921829 351.798160 0.464063
14.927407 356.686250 0.466992
14.932984 358.019810 0.467579
14.938561 356.100220 0.466039
14.944139 351.287450 0.462596
14.949716 344.218020 0.457638
14.955293 334.975010 0.451176
14.960870 323.786320 0.443305
14.966447 312.102200 0.434966
14.972025 299.899900 0.426117
14.977602 287.858730 0.417218
14.983179 277.484710 0.409379
14.988756 268.790830 0.402667
14.994333 263.397580 0.398360
14.999910 261.974000 0.397037
15.005487 264.150600 0.398437
15.011065 270.982030 0.403306
15.016643 282.056550 0.411210
15.022220 296.521640 0.421361
15.027797 312.236450 0.432113
15.033374 327.315890 0.442149
15.038951 339.773900 0.450205
15.044528 347.721710 0.455156
15.050105 349.774080 0.456212
15.055682 345.258730 0.452974
15.061260 333.945340 0.445212
15.066837 320.121610 0.435627
15.072414 307.229920 0.426497
15.077991 287.782010 0.412518
15.083569 267.485900 0.397455
15.089146 247.560200 0.382124
15.094723 223.593670 0.362927
15.100301 206.130630 0.348246
15.105878 191.276210 0.335252
15.111455 178.964570 0.324077
15.117032 168.431750 0.314196
15.122609 160.158200 0.306188
15.128186 153.873460 0.299929
15.133763 149.089230 0.295041
15.139340 145.221620 0.291003
15.144918 142.085110 0.287660
15.150496 139.541720 0.284891
15.156073 137.112150 0.282219
15.161650 135.264140 0.280130
15.167227 133.854340 0.278487
15.172804 132.519700 0.276917
15.178381 131.469350 0.275639
15.183958 130.562620 0.274510
15.189536 129.688580 0.273412
15.195113 129.047090 0.272558
15.200690 128.765410 0.272084
15.206267 128.687770 0.271825
15.211844 128.770840 0.271735
15.217422 129.377700 0.272197
15.222999 130.371640 0.273062
15.228577 131.920960 0.274500
15.234154 134.215010 0.276694
15.239731 135.542800 0.277877
15.245308 136.406850 0.278577
15.250885 136.088620 0.278069
15.256462 134.616610 0.276378
15.262039 132.283220 0.273791
15.267616 129.731930 0.270958
15.273194 127.548390 0.268489
15.278771 125.275960 0.265909
15.284348 124.036350 0.264414
15.289926 123.309720 0.263462
15.295503 122.557010 0.262481
15.301080 122.056660 0.261768
15.306657 121.723230 0.261235
15.312234 121.472310 0.260789
15.317812 121.377240 0.260511
15.323389 121.336240 0.260291
15.328966 121.236040 0.260007
15.334543 121.255890 0.259851
15.340120 121.075170 0.259481
15.345697 121.024980 0.259250
15.351274 121.125500 0.259180
15.356853 121.129760 0.259007
15.362430 121.052380 0.258746
15.368007 120.865460 0.258368
15.373584 120.909420 0.258236
15.379161 120.993770 0.258148
15.384738 121.416940 0.258419
15.390315 122.045880 0.258907
15.395892 122.698300 0.259417
15.401470 123.406820 0.259983
15.407047 123.976800 0.260400
15.412624 124.809960 0.261090
15.418201 125.835460 0.261976
15.423779 126.573620 0.262558
15.429356 127.486430 0.263316
15.434933 128.081150 0.263742
15.440510 128.145130 0.263620
15.446088 127.956140 0.263237
15.451665 127.332530 0.262407
15.457242 126.694820 0.261561
15.462819 126.171910 0.260833
15.468396 125.995880 0.260463
15.473973 126.150560 0.260434
15.479550 126.714210 0.260825
15.485128 127.768440 0.261717
15.490705 129.211520 0.262998
15.496283 131.439740 0.265062
15.501860 134.272310 0.267705
15.507437 137.250460 0.270458
15.513014 140.609650 0.273545
15.518591 144.269910 0.276877
15.524168 147.394680 0.279651
15.529746 150.037490 0.281935
15.535323 151.768200 0.283344
15.540900 152.300460 0.283626
15.546477 151.302550 0.282482
15.552054 149.346330 0.280437
15.557631 146.571810 0.277608
15.563209 143.164580 0.274153
15.568786 139.746050 0.270652
15.574364 136.183260 0.266974
15.579941 132.962390 0.263594
15.585518 130.107770 0.260546
15.591095 127.512950 0.257734
15.596672 125.621880 0.255615
15.602249 123.758050 0.253512
15.607826 122.127540 0.251638
15.613404 121.093100 0.250371
15.618981 120.048360 0.249090
15.624558 119.238590 0.248050
15.630136 118.564470 0.247149
15.635713 117.947190 0.246305
15.641290 117.439410 0.245575
15.646867 116.982200 0.244897
15.652444 116.651750 0.244350
15.658022 116.369090 0.243852
15.663599 116.102910 0.243372
15.669176 115.993350 0.243054
15.674753 115.784360 0.242632
15.680330 115.571080 0.242204
15.685907 115.456770 0.241879
15.691484 115.191350 0.241395
15.697062 115.105740 0.241099
15.702640 115.076740 0.240860
15.708217 114.811030 0.240374
15.713794 114.722900 0.240072
15.719371 114.479930 0.239606
15.724948 114.220360 0.239123
15.730525 114.169670 0.238857
15.736102 114.017280 0.238484
15.741680 113.919140 0.238166
15.747257 113.824540 0.237850
15.752834 113.765320 0.237570
15.758411 113.876050 0.237466
15.763988 113.914250 0.237285
15.769566 113.830380 0.236975
15.775143 113.848890 0.236770
15.780720 113.615490 0.236301
15.786298 113.641170 0.236100
15.791875 114.052280 0.236297
15.797452 114.403590 0.236428
15.803029 115.107110 0.236919
15.808606 115.823070 0.237416
15.814183 116.536050 0.237905
15.819760 117.311510 0.238451
15.825337 118.083260 0.238986
15.830915 118.833980 0.239494
15.836493 119.127020 0.239535
15.842070 119.078260 0.239229
15.847647 118.749500 0.238639
15.853224 117.987010 0.237609
15.858801 117.117360 0.236468
15.864378 116.094020 0.235165
15.869956 115.171110 0.233959
15.875533 114.579990 0.233084
15.881110 114.159030 0.232378
15.886687 114.410020 0.232351
15.892264 115.237820 0.232902
15.897841 115.888150 0.233264
15.903419 116.729640 0.233807
15.908996 117.109360 0.233878
15.914574 117.242610 0.233695
15.920151 117.124290 0.233253
15.925728 116.638690 0.232436
15.931305 116.387820 0.231844
15.936882 115.837300 0.230943
15.942459 115.154940 0.229898
15.948036 114.790220 0.229157
15.953613 114.829940 0.228802
15.959191 115.094180 0.228650
15.964768 115.169470 0.228285
15.970345 115.635300 0.228274
15.975923 116.315630 0.228431
15.981500 117.487270 0.229007
15.987077 119.316110 0.230119
15.992654 122.580430 0.232417
15.998232 127.041420 0.235283
16.003809 132.690630 0.194164
16.009386 140.897930 0.200059
16.014963 152.276310 0.207959
16.020540 165.840450 0.217001
16.026117 181.353620 0.226900
16.031694 197.712390 0.236889
16.037271 211.593080 0.245039
16.042849 220.758940 0.250264
16.048426 223.837420 0.251977
16.054003 220.401440 0.250010
16.059580 211.320950 0.244781
16.065159 198.688660 0.237328
16.070736 184.028290 0.228381
16.076313 169.530580 0.219178
16.081890 156.672990 0.210682
16.087467 145.766270 0.203195
16.093044 137.640380 0.197430
16.098621 131.227130 0.192756
16.104198 126.378490 0.189142
16.109776 123.486720 0.186947
16.115353 121.262340 0.185237
16.120930 119.727490 0.184042
16.126507 118.796400 0.183306
16.132084 118.156770 0.182793
16.137661 117.892160 0.182570
16.143238 117.644250 0.182359
16.148817 117.668680 0.182359
16.154394 117.849180 0.182480
16.159971 118.276350 0.182792
16.165548 118.890230 0.183247
16.171125 119.555130 0.183740
16.176702 120.560970 0.184493
16.182280 121.685050 0.185332
16.187857 122.764660 0.186133
16.193434 124.119740 0.187138
16.199011 125.601490 0.188233
16.204588 127.025630 0.189278
16.210165 128.926070 0.190669
16.215742 131.367190 0.192446
16.221319 134.441100 0.194664
16.226896 138.598680 0.197631
16.232473 143.969730 0.201403
16.238052 150.176850 0.205678
16.243629 157.146610 0.210375
16.249207 164.102290 0.214959
16.254784 170.430570 0.219042
16.260361 175.948320 0.222536
16.265938 179.742070 0.224900
16.271515 181.577390 0.226022
16.277092 181.547300 0.225980
16.282669 180.212460 0.225124
16.288246 178.052860 0.223749
16.293823 175.698870 0.222242
16.299400 174.191130 0.221263
16.304977 173.111470 0.220554
16.310555 173.405350 0.220719
16.316132 174.869350 0.221626
16.321711 176.911100 0.222893
16.327288 179.701710 0.224621
16.332865 182.668620 0.226444
16.338442 186.412260 0.228729
16.344019 191.686340 0.231919
16.349596 198.018100 0.235694
16.355173 205.844570 0.240282
16.360750 215.292140 0.245708
16.366327 225.306810 0.251332
16.371904 235.455220 0.256904
16.377481 245.092040 0.262082
16.383059 252.889330 0.266191
16.388636 258.386050 0.269040
16.394213 261.121860 0.270433
16.399790 261.617000 0.270662
16.405369 260.131990 0.269864
16.410946 257.860960 0.268656
16.416523 255.900480 0.267605
16.422100 254.663440 0.266930
16.427677 254.695210 0.266920
16.433254 256.385960 0.267777
16.438831 259.231110 0.269230
16.444408 262.422670 0.270855
16.449986 265.068760 0.272189
16.455563 266.132720 0.272707
16.461140 264.143680 0.271658
16.466717 258.915890 0.268928
16.472294 250.885970 0.264698
16.477871 239.896670 0.258809
16.483448 227.919710 0.252240
16.489025 214.535450 0.244696
16.494604 201.050290 0.236857
16.500181 189.154570 0.229719
16.505758 177.465320 0.222485
16.511335 167.744920 0.216284
16.516912 160.151630 0.211310
16.522490 153.629970 0.206941
16.528067 148.922130 0.203725
16.533644 144.897920 0.200933
16.539221 141.089140 0.198254
16.544798 137.884220 0.195969
16.550375 134.298550 0.193384
16.555952 131.088060 0.191039
16.561529 128.638460 0.189226
16.567106 126.713660 0.187786
16.572683 125.632890 0.186964
16.578262 125.287340 0.186687
16.583839 125.381810 0.186738
16.589417 126.203540 0.187330
16.594994 127.690670 0.188411
16.600571 130.076770 0.190144
16.606148 134.429690 0.193279
16.611725 140.939960 0.197883
16.617302 149.888470 0.204048
16.622879 163.008120 0.212768
16.628456 180.007260 0.223564
16.634033 201.663440 0.236606
16.639610 226.328690 0.250633
16.645187 250.454680 0.263626
16.650764 272.347230 0.274878
16.656342 286.699460 0.281998
16.661919 291.620450 0.284379
16.667498 286.259740 0.281724
16.673075 272.039730 0.274609
16.678652 251.497700 0.264010
16.684229 227.976870 0.251336
16.689806 204.394560 0.237957
16.695383 182.290040 0.224699
16.700960 164.553710 0.213466
16.706537 150.683380 0.204250
16.712114 139.991990 0.196850
16.717691 132.233700 0.191298
16.723269 126.706180 0.187238
16.728846 122.900380 0.184385
16.734423 120.389210 0.182473
16.740000 118.246860 0.180823
16.745577 116.482930 0.179451
16.751156 115.230420 0.178465
16.756733 114.129750 0.177592
16.762310 113.320260 0.176943
16.767887 112.663830 0.176411
16.773464 112.344280 0.176143
16.779041 111.910290 0.175784
16.784618 111.563390 0.175493
16.790195 111.382400 0.175333
16.795773 110.895650 0.174931
16.801350 110.631340 0.174704
16.806927 110.399820 0.174503
16.812504 110.534410 0.174592
16.818081 110.798550 0.174782
16.823658 111.249050 0.175119
16.829235 112.426810 0.176025
16.834814 113.952160 0.177197
16.840391 115.176390 0.178128
16.845968 116.462800 0.179101
16.851545 116.836360 0.179369
16.857122 116.270680 0.178916
16.862700 115.656110 0.178424
16.868277 114.458040 0.177479
16.873854 113.415790 0.176651
16.879431 112.760970 0.176122
16.885008 112.623490 0.175996
16.890585 112.824640 0.176135
16.896162 113.269440 0.176464
16.901739 113.977080 0.176996
16.907316 114.614010 0.177471
16.912893 115.194470 0.177902
16.918470 116.127580 0.178602
16.924049 117.139870 0.179360
16.929626 118.185370 0.180140
16.935204 119.843140 0.181380
16.940781 121.660400 0.182731
16.946358 123.772930 0.184292
16.951935 126.610900 0.186373
16.957512 129.959440 0.188802
16.963089 134.023070 0.191712
16.968666 139.183460 0.195347
16.974243 145.208540 0.199510
16.979820 152.876270 0.204688
16.985397 161.202100 0.210166
16.990974 170.267940 0.215973
16.996552 181.015120 0.222662
17.002129 192.116810 0.229364
17.007708 204.180220 0.236431
17.013285 216.398060 0.243377
17.018862 228.496750 0.250062
17.024439 240.700150 0.256626
17.030016 251.682910 0.262388
17.035593 261.558960 0.267459
17.041170 269.950070 0.271687
17.046747 275.087040 0.274231
17.052324 276.823000 0.275067
17.057901 275.309970 0.274285
17.063478 270.231600 0.271716
17.069056 261.518920 0.267272
17.074633 250.281010 0.261439
17.080210 235.735820 0.253702
17.085787 219.574220 0.244825
17.091366 203.481020 0.235658
17.096943 187.388020 0.226124
17.102520 172.687850 0.217051
17.108097 160.762680 0.209401
17.113674 150.871410 0.202835
17.119251 143.185700 0.197581
17.124828 136.943700 0.193206
17.130405 131.587490 0.189370
17.135983 127.727180 0.186553
17.141560 124.059350 0.183835
17.147137 120.932420 0.181485
17.152714 118.669140 0.179760
17.158291 116.276910 0.177920
17.163868 114.596870 0.176612
17.169445 113.335290 0.175619
17.175022 112.091100 0.174634
17.180601 111.137490 0.173872
17.186178 110.249660 0.173158
17.191755 109.363360 0.172442
17.197332 108.870800 0.172036
17.202909 108.664630 0.171855
17.208487 108.553820 0.171749
17.214064 108.457790 0.171655
17.219641 108.283740 0.171500
17.225218 108.082370 0.171322
17.230795 107.947140 0.171197
17.236372 107.982400 0.171207
17.241949 108.273800 0.171420
17.247526 108.863040 0.171868
17.253103 109.555390 0.172396
17.258680 110.922210 0.173450
17.264259 113.148740 0.175164
17.269836 115.363430 0.176852
17.275414 117.903690 0.178770
17.280991 120.319340 0.180573
17.286568 121.701760 0.181588
17.292145 121.787670 0.181633
17.297722 121.259360 0.181220
17.303299 119.883070 0.180170
17.308876 118.323520 0.178976
17.314453 117.813320 0.178571
17.320030 117.817510 0.178555
17.325607 119.058750 0.179475
17.331184 120.958030 0.180882
17.336761 123.635950 0.182854
17.342339 127.555740 0.185711
17.347918 131.913440 0.188837
17.353495 137.071760 0.192473
17.359072 142.613770 0.196305
17.364649 148.464480 0.200271
17.370226 154.274990 0.204131
17.375803 159.879180 0.207784
17.381380 165.368360 0.211299
17.386957 171.203410 0.214972
17.392534 176.677060 0.218359
17.398111 183.102290 0.222270
17.403688 190.453700 0.226665
17.409266 197.786590 0.230963
17.414843 204.862960 0.235034
17.420420 210.418200 0.238175
17.425997 213.302150 0.239776
17.431574 212.559250 0.239333
17.437153 208.396840 0.236954
17.442730 200.348160 0.232309
17.448307 190.062390 0.226243
17.453884 178.583160 0.219282
17.459461 167.208680 0.212161
17.465038 156.884260 0.205486
17.470615 147.344730 0.199120
17.476192 140.175400 0.194195
17.481770 134.621220 0.190289
17.487347 129.865550 0.186878
17.492924 126.444710 0.184381
17.498501 123.283000 0.182042
17.504078 120.789280 0.180173
17.509655 118.723800 0.178607
17.515232 116.888160 0.177203
17.520811 115.507330 0.176134
17.526388 114.314300 0.175204
17.531965 113.020230 0.174191
17.537542 112.081950 0.173449
17.543119 111.666310 0.173109
17.548697 111.290060 0.172799
17.554274 111.401920 0.172868
17.559851 111.890220 0.173228
17.565428 112.617510 0.173772
17.571005 113.477910 0.174417
17.576582 114.465180 0.175155
17.582159 115.596380 0.176000
17.587736 116.958500 0.177016
17.593313 118.604440 0.178238
17.598890 120.625810 0.179732
17.604469 122.450870 0.181068
17.610046 124.231450 0.182361
17.615623 125.722340 0.183432
17.621201 126.473850 0.183961
17.626778 126.704080 0.184109
17.632355 126.150960 0.183687
17.637932 124.495370 0.182459
17.643509 122.036970 0.180630
17.649086 119.243420 0.178532
17.654663 116.412160 0.176381
17.660240 114.117100 0.174616
17.665817 112.469580 0.173332
17.671394 111.164390 0.172306
17.676971 110.380080 0.171679
17.682549 109.749920 0.171170
17.688126 109.247270 0.170760
17.693705 109.006340 0.170554
17.699282 108.365150 0.170034
17.704859 108.010290 0.169738
17.710436 107.457790 0.169285
17.716013 106.874670 0.168808
17.721590 106.554080 0.168537
17.727167 106.426380 0.168418
17.732744 106.501540 0.168460
17.738321 107.172200 0.168972
17.743898 108.507120 0.170003
17.749475 110.343210 0.171418
17.755053 113.078880 0.173512
17.760630 116.216120 0.175884
17.766207 120.358380 0.178972
17.771784 125.520150 0.182750
17.777363 130.595140 0.186389
17.782940 136.400910 0.190467
17.788517 142.324490 0.194539
17.794094 147.710880 0.198165
17.799671 152.936480 0.201619
17.805248 157.213490 0.204397
17.810825 161.010970 0.206830
17.816402 163.670290 0.208509
17.821980 165.628040 0.209730
17.827557 166.692900 0.210381
17.833134 166.724230 0.210379
17.838711 165.791150 0.209768
17.844288 163.502580 0.208293
17.849865 160.191380 0.206152
17.855442 155.357130 0.202996
17.861019 149.560650 0.199153
17.866598 143.358660 0.194959
17.872175 136.581560 0.190275
17.877752 130.360810 0.185872
17.883329 125.147120 0.182099
17.888906 120.543700 0.178699
17.894484 116.989270 0.176027
17.900061 114.183650 0.173885
17.905638 111.911190 0.172128
17.911215 110.354160 0.170909
17.916792 109.129290 0.169940
17.922369 108.430400 0.169377
17.927946 108.565600 0.169465
17.933523 108.914220 0.169719
17.939100 109.528500 0.170179
17.944677 110.028360 0.170549
17.950256 110.360050 0.170788
17.955833 110.590280 0.170949
17.961411 110.523210 0.170879
17.966988 110.974300 0.171210
17.972565 111.336240 0.171471
17.978142 112.110120 0.172048
17.983719 113.630060 0.173192
17.989296 115.529960 0.174616
17.994873 118.366080 0.176727
18.000450 121.800420 0.179254
18.006027 125.719890 0.182097
18.011604 130.885360 0.185780
18.017181 136.546190 0.189736
18.022758 142.572910 0.193857
18.028336 149.524860 0.198507
18.033915 156.254680 0.202904
18.039492 162.446470 0.206863
18.045069 167.866240 0.210264
18.050646 172.054140 0.212848
18.056223 175.649230 0.215038
18.061800 178.177200 0.216557
18.067377 180.440690 0.217906
18.072954 183.534150 0.219743
18.078531 187.226140 0.221919
18.084108 192.447540 0.224969
18.089685 198.372040 0.228381
18.095263 203.938630 0.231539
18.100840 208.075070 0.233851
18.106417 209.308460 0.234519
18.111994 207.265990 0.233348
18.117571 201.904720 0.230286
18.123150 193.708450 0.225540
18.128727 183.784770 0.219664
18.134304 172.799360 0.212975
18.139881 162.536680 0.206533
18.145458 153.779020 0.200871
18.151035 146.882350 0.196294
18.156612 142.370270 0.193236
18.162189 139.903880 0.191534
18.167767 139.578320 0.191292
18.173344 141.136400 0.192336
18.178921 144.254390 0.194429
18.184498 148.248280 0.197081
18.190075 153.128540 0.200278
18.195652 157.132720 0.202859
18.201229 159.733440 0.204509
18.206808 160.267730 0.204830
18.212385 158.200870 0.203483
18.217962 154.358380 0.200976
18.223539 149.779630 0.197952
18.229116 145.437590 0.195042
18.234694 141.551590 0.192398
18.240271 138.505490 0.190297
18.245848 136.436780 0.188851
18.251425 135.270800 0.188023
18.257002 135.195650 0.187951
18.262579 136.508260 0.188841
18.268156 139.192320 0.190669
18.273733 143.156490 0.193345
18.279310 148.320330 0.196780
18.284887 154.245850 0.200652
18.290466 160.244980 0.204495
18.296043 166.144910 0.208204
18.301620 170.223980 0.210723
18.307198 172.321910 0.211995
18.312775 172.248920 0.211928
18.318352 169.685550 0.210323
18.323929 165.049100 0.207408
18.329506 158.747560 0.203389
18.335083 151.362350 0.198581
18.340660 143.617610 0.193414
18.346237 136.214230 0.188343
18.351814 129.574750 0.183676
18.357391 123.644050 0.179405
18.362968 118.757620 0.175806
18.368546 114.882720 0.172896
18.374123 111.748740 0.170504
18.379702 109.004950 0.168380
18.385279 107.031080 0.166831
18.390856 105.578350 0.165678
18.396433 104.184670 0.164563
18.402010 103.188030 0.163757
18.407587 102.268260 0.163009
18.413164 101.495740 0.162375
18.418741 100.871630 0.161858
18.424318 100.261660 0.161351
18.429895 99.912247 0.161053
18.435472 99.502815 0.160706
18.441050 99.033432 0.160310
18.446627 98.650444 0.159983
18.452204 98.534439 0.159872
18.457781 98.346352 0.159703
18.463360 98.315308 0.159661
18.468937 98.488632 0.159785
18.474514 98.280388 0.159600
18.480091 98.189026 0.159509
18.485668 98.114365 0.159432
18.491245 97.950012 0.159281
18.496822 97.843842 0.159178
18.502399 97.827477 0.159149
18.507977 97.661385 0.158997
18.513554 97.784317 0.159080
18.519131 97.629227 0.158938
18.524708 97.481850 0.158801
18.530285 97.596771 0.158878
18.535862 97.562325 0.158834
18.541439 97.791122 0.159003
18.547018 97.953484 0.159118
18.552595 98.279961 0.159367
18.558172 98.912285 0.159862
18.563749 99.266556 0.160131
18.569326 99.533058 0.160330
18.574903 99.494591 0.160282
18.580481 98.865730 0.159758
18.586058 98.298744 0.159283
18.591635 97.796509 0.158859
18.597212 97.384056 0.158507
18.602789 97.031723 0.158203
18.608366 96.760963 0.157966
18.613943 96.845886 0.158019
18.619520 96.710091 0.157892
18.625097 96.710999 0.157876
18.630674 96.856773 0.157978
18.636253 96.855431 0.157961
18.641830 97.279640 0.158290
18.647408 97.436180 0.158401
18.652985 97.982216 0.158828
18.658562 98.187286 0.158977
18.664139 98.613747 0.159305
18.669716 99.387665 0.159913
18.675293 100.032590 0.160414
18.680870 101.244950 0.161366
18.686447 102.340810 0.162220
18.692024 104.140900 0.163624
18.697601 106.613580 0.165538
18.703178 109.440640 0.167701
18.708755 113.257290 0.170582
18.714333 117.817960 0.173965
18.719912 123.588990 0.178156
18.725489 130.375500 0.182963
18.731066 138.439650 0.188517
18.736643 147.458110 0.194540
18.742220 155.670530 0.199863
18.747797 162.543380 0.204206
18.753374 167.720730 0.207411
18.758951 169.534380 0.208508
18.764528 168.544330 0.207877
18.770105 164.908920 0.205601
18.775682 158.326480 0.201435
18.781260 150.976840 0.196684
18.786837 143.051470 0.191432
18.792414 135.430890 0.186244
18.797991 128.638240 0.181494
18.803568 123.310020 0.177677
18.809147 119.456930 0.174861
18.814724 116.594800 0.172736
18.820301 115.088650 0.171599
18.825878 114.622630 0.171233
18.831455 115.163460 0.171619
18.837032 116.998310 0.172963
18.842609 120.115360 0.175233
18.848186 124.747590 0.178562
18.853764 131.357350 0.183212
18.859341 139.288680 0.188643
18.864918 148.785930 0.194948
18.870495 159.613600 0.201896
18.876072 170.561940 0.208683
18.881649 180.794460 0.214830
18.887226 189.385860 0.219852
18.892805 196.291240 0.223801
18.898382 200.781850 0.226323
18.903959 203.327100 0.227729
18.909536 203.935360 0.228046
18.915113 202.402830 0.227164
18.920691 199.327270 0.225408
18.926268 193.773830 0.222223
18.931845 185.719020 0.217532
18.937422 176.458440 0.212018
18.942999 166.486710 0.205919
18.948576 156.836520 0.199841
18.954153 147.592540 0.193842
18.959730 139.245800 0.188261
18.965307 131.978270 0.183264
18.970884 125.635180 0.178787
18.976463 120.002870 0.174715
18.982040 115.521160 0.171404
18.987617 112.309290 0.168987
18.993195 109.533100 0.166868
18.998772 107.408740 0.165225
19.004349 105.501660 0.163734
19.009926 104.031910 0.162573
19.015503 103.146750 0.161863
19.021080 102.624770 0.161436
19.026657 102.392410 0.161237
19.032234 102.411420 0.161235
19.037811 102.418470 0.161224
19.043388 102.756450 0.161473
19.048965 103.594670 0.162113
19.054543 104.553810 0.162845
19.060120 105.767190 0.163770
19.065699 107.043900 0.164739
19.071276 109.002800 0.166222
19.076853 111.180980 0.167857
19.082430 113.880090 0.169865
19.088007 117.176900 0.172288
19.093584 120.620920 0.174784
19.099161 124.660420 0.177668
19.104738 129.073070 0.180766
19.110315 134.246400 0.184334
19.115892 139.599200 0.187954
19.121469 144.553040 0.191240
19.127047 149.181110 0.194257
19.132624 153.294780 0.196896
19.138201 156.574430 0.198971
19.143778 158.821060 0.200372
19.149357 159.917270 0.201042
19.154934 159.334590 0.200655
19.160511 157.448210 0.199443
19.166088 154.906780 0.197806
19.171665 151.203920 0.195407
19.177242 147.098630 0.192716
19.182819 142.821200 0.189874
19.188396 139.175060 0.187415
19.193974 136.310460 0.185457
19.199551 134.921160 0.184491
19.205128 134.746700 0.184352
19.210705 135.110930 0.184582
19.216282 135.224230 0.184640
19.221859 135.047380 0.184500
19.227436 134.226010 0.183919
19.233015 132.292070 0.182571
19.238592 129.979230 0.180949
19.244169 126.998210 0.178843
19.249746 123.472760 0.176325
19.255323 119.752830 0.173631
19.260900 116.178090 0.171002
19.266478 112.824040 0.168498
19.272055 110.024770 0.166377
19.277632 107.500480 0.164441
19.283209 105.354290 0.162774
19.288786 103.776010 0.161534
19.294363 102.092380 0.160201
19.299940 100.845570 0.159204
19.305517 100.033620 0.158545
19.311094 99.095596 0.157784
19.316671 98.487549 0.157283
19.322250 98.182327 0.157022
19.327827 98.040039 0.156892
19.333405 98.031235 0.156869
19.338982 97.987801 0.156818
19.344559 98.124664 0.156911
19.350136 98.354034 0.157078
19.355713 98.655289 0.157302
19.361290 99.362755 0.157849
19.366867 100.494000 0.158729
19.372444 102.129810 0.159999
19.378021 104.560520 0.161875
19.383598 107.766010 0.164320
19.389175 112.258980 0.167694
19.394753 117.983700 0.171898
19.400330 124.479410 0.176549
19.405909 132.159940 0.181895
19.411486 139.944780 0.187156
19.417063 147.238690 0.191952
19.422640 152.857350 0.195560
19.428217 156.351070 0.197762
19.433794 157.006670 0.198155
19.439371 154.780900 0.196725
19.444948 150.196750 0.193770
19.450525 144.015120 0.189721
19.456102 138.062520 0.185740
19.461679 132.625690 0.182027
19.467257 128.363490 0.179060
19.472834 124.823650 0.176555
19.478411 122.282610 0.174731
19.483988 120.260870 0.173263
19.489567 118.578170 0.172028
19.495144 116.726990 0.170663
19.500721 114.658540 0.169126
19.506298 112.237100 0.167314
19.511875 109.653440 0.165360
19.517452 107.086570 0.163396
19.523029 104.731240 0.161572
19.528606 102.754650 0.160024
19.534184 100.734860 0.158427
19.539761 99.189346 0.157191
19.545338 97.982353 0.156215
19.550915 96.803276 0.155256
19.556492 96.196724 0.154753
19.562069 95.574936 0.154236
19.567646 95.198494 0.153916
19.573223 94.678284 0.153479
19.578802 94.341019 0.153190
19.584379 94.326363 0.153162
19.589956 94.425224 0.153227
19.595533 94.734314 0.153461
19.601110 94.746490 0.153456
19.606688 95.096870 0.153723
19.612265 95.120499 0.153726
19.617842 95.098694 0.153693
19.623419 95.716377 0.154175
19.628996 96.411194 0.154718
19.634573 97.032471 0.155200
19.640150 98.254494 0.156158
19.645727 99.345840 0.157006
19.651304 100.497650 0.157898
19.656881 101.896530 0.158976
19.662460 103.269180 0.160027
19.668037 104.958710 0.161314
19.673615 106.097060 0.162170
19.679192 107.341590 0.163101
19.684769 108.044140 0.163617
19.690346 107.951630 0.163531
19.695923 107.728490 0.163345
19.701500 106.945410 0.162733
19.707077 106.095900 0.162069
19.712654 105.091320 0.161283
19.718231 103.879170 0.160334
19.723808 102.842990 0.159516
19.729385 101.368250 0.158351
19.734962 100.286480 0.157488
19.740540 99.618881 0.156947
19.746119 99.196716 0.156598
19.751696 99.261787 0.156633
19.757273 99.102249 0.156491
19.762850 99.119415 0.156488
19.768427 98.602257 0.156063
19.774004 97.896698 0.155488
19.779581 97.308060 0.155004
19.785158 96.461014 0.154312
19.790735 95.794334 0.153762
19.796312 95.373947 0.153408
19.801889 95.105370 0.153176
19.807467 94.940178 0.153028
19.813044 94.801834 0.152900
19.818621 94.462250 0.152610
19.824198 94.298691 0.152463
19.829775 94.134567 0.152314
19.835354 94.020134 0.152206
19.840931 94.539276 0.152610
19.846508 94.909782 0.152893
19.852085 95.457115 0.153317
19.857662 96.273415 0.153956
19.863239 96.905785 0.154444
19.868816 97.728279 0.155083
19.874393 98.519348 0.155693
19.879971 99.471863 0.156428
19.885548 100.285060 0.157050
19.891125 100.951480 0.157554
19.896702 101.570080 0.158020
19.902279 102.289120 0.158562
19.907856 103.081880 0.159159
19.913433 103.957390 0.159817
19.919012 104.888210 0.160514
19.924589 105.999650 0.161346
19.930166 107.111970 0.162174
19.935743 108.981810 0.163566
19.941320 110.900920 0.164983
19.946898 112.851780 0.166411
19.952475 115.157340 0.168085
19.958052 117.187590 0.169543
19.963629 118.965410 0.170806
19.969206 120.251130 0.171709
19.974783 121.130150 0.172318
19.980360 121.177350 0.172334
19.985937 121.214840 0.172343
19.991514 121.087370 0.172234
19.997091 121.055480 0.172194
20.002668 121.604570 0.172566
20.008247 122.812990 0.173404
20.013824 124.447630 0.174536
20.019402 127.055240 0.176337
20.024979 130.022450 0.178366
20.030556 133.517010 0.180728
20.036133 137.737150 0.183544
20.041710 141.208570 0.185823
20.047287 144.801100 0.188153
20.052864 147.202700 0.189687
20.058441 148.417770 0.190449
20.064018 148.781430 0.190662
20.069595 147.886180 0.190068
20.075172 146.624710 0.189237
20.080750 144.908290 0.188106
20.086327 143.717560 0.187313
20.091906 143.403930 0.187089
20.097483 143.749020 0.187295
20.103060 145.377750 0.188333
20.108637 147.584210 0.189738
20.114214 150.370120 0.191501
20.119791 154.047450 0.193808
20.125368 158.005080 0.196262
20.130945 161.651790 0.198493
20.136522 164.342120 0.200118
20.142099 166.053880 0.201137
20.147676 166.015140 0.201093
20.153254 165.388080 0.200692
20.158831 164.144560 0.199915
20.164408 162.313510 0.198777
20.169985 160.529890 0.197661
20.175564 158.843020 0.196600
20.181141 157.314970 0.195632
20.186718 156.377030 0.195028
20.192295 156.503200 0.195087
20.197872 157.385410 0.195616
20.203449 159.726170 0.197045
20.209026 163.116070 0.199104
20.214603 168.389250 0.202276
20.220181 174.851240 0.206100
20.225758 182.329790 0.210440
20.231335 190.321060 0.214980
20.236912 198.375850 0.219459
20.242489 205.267040 0.223216
20.248066 209.347730 0.225401
20.253643 209.699420 0.225567
20.259220 205.795240 0.223434
20.264799 199.107120 0.219751
20.270376 189.328510 0.214265
20.275953 178.649610 0.208113
20.281530 167.671800 0.201597
20.287107 157.598820 0.195428
20.292685 149.513030 0.190329
20.298262 142.483230 0.185781
20.303839 137.135680 0.182243
20.309416 132.935490 0.179412
20.314993 129.220490 0.176869
20.320570 125.763060 0.174469
20.326147 122.571430 0.172224
20.331724 119.594600 0.170102
20.337301 116.371990 0.167777
20.342878 113.545560 0.165710
20.348457 110.946290 0.163786
20.354034 108.623990 0.162046
20.359612 106.802060 0.160665
20.365189 105.246160 0.159474
20.370766 103.892260 0.158429
20.376343 102.946530 0.157690
20.381920 102.136750 0.157053
20.387497 101.394320 0.156465
20.393074 101.606850 0.156613
20.398651 101.970240 0.156876
20.404228 102.615660 0.157356
20.409805 104.162450 0.158521
20.415382 105.360760 0.159414
20.420959 106.560850 0.160303
20.426537 108.050480 0.161403
20.432116 109.607770 0.162545
20.437693 111.561100 0.163971
20.443270 113.164400 0.165128
20.448847 115.113900 0.166527
20.454424 116.917200 0.167809
20.460001 118.918660 0.169222
20.465578 121.713260 0.171182
20.471155 124.521840 0.173128
20.476732 127.566440 0.175213
20.482309 129.792100 0.176717
20.487886 131.136610 0.177612
20.493464 131.270690 0.177685
20.499041 130.280850 0.176995
20.504618 128.335240 0.175651
20.510195 125.919410 0.173972
20.515772 123.371390 0.172185
20.521351 121.236270 0.170671
20.526928 119.973780 0.169763
20.532505 119.068790 0.169104
20.538082 118.288410 0.168532
20.543659 117.666240 0.168071
20.549236 116.576350 0.167274
20.554813 115.328140 0.166359
20.560390 113.814500 0.165247
20.565968 111.863460 0.163808
20.571545 109.383660 0.161965
20.577122 106.653920 0.159915
20.582699 103.985210 0.157886
20.588276 101.460570 0.155941
20.593853 99.415955 0.154346
20.599430 97.724152 0.153012
20.605009 96.736412 0.152221
20.610586 95.814621 0.151479
20.616163 95.159782 0.150945
20.621740 94.642303 0.150518
20.627317 94.117226 0.150085
20.632895 93.847122 0.149854
20.638472 93.666611 0.149695
20.644049 93.514336 0.149558
20.649626 93.535324 0.149559
20.655203 93.604370 0.149599
20.660780 93.509209 0.149508
20.666357 94.058304 0.149931
20.671934 94.297272 0.150106
20.677511 94.684914 0.150399
20.683088 95.074013 0.150692
20.688667 95.162605 0.150747
20.694244 95.439674 0.150951
20.699821 95.510452 0.150992
20.705399 95.574715 0.151027
20.710976 95.816444 0.151202
20.716553 95.817589 0.151188
20.722130 95.984520 0.151304
20.727707 96.324867 0.151557
20.733284 96.215538 0.151455
20.738861 96.013054 0.151280
20.744438 95.635757 0.150967
20.750015 94.917854 0.150384
20.755592 94.157036 0.149765
20.761169 93.549469 0.149266
20.766747 92.788513 0.148643
20.772324 92.303566 0.148239
20.777903 91.578796 0.147641
20.783480 90.915512 0.147090
20.789057 90.303185 0.146579
20.794634 89.749062 0.146114
20.800211 89.476990 0.145877
20.805788 89.199867 0.145636
20.811365 88.501572 0.145050
20.816942 88.052490 0.144667
20.822519 87.659294 0.144329
20.828096 87.197441 0.143934
20.833673 87.205574 0.143926
20.839251 87.060387 0.143791
20.844828 87.140533 0.143843
20.850405 87.217049 0.143891
20.855982 87.413605 0.144039
20.861561 87.721764 0.144278
20.867138 87.982491 0.144477
20.872715 88.297806 0.144721
20.878292 88.677032 0.145017
20.883869 89.269363 0.145486
20.889446 89.570618 0.145716
20.895023 90.024742 0.146070
20.900600 90.526016 0.146461
20.906178 90.935448 0.146777
20.911755 91.253220 0.147019
20.917332 91.787643 0.147434
20.922909 92.351547 0.147871
20.928486 92.798325 0.148213
20.934063 92.745056 0.148155
20.939640 91.726158 0.147324
20.945217 90.417244 0.146255
20.950796 88.680649 0.144828
20.956373 87.584671 0.143916
20.961950 86.755959 0.143219
20.967527 85.854263 0.142458
20.973104 85.634071 0.142261
20.978682 85.588226 0.142209
20.984259 85.414833 0.142050
20.989836 85.524857 0.142127
20.995413 85.393867 0.142004
21.000990 85.329559 0.141936
21.006567 85.499367 0.142063
21.012144 85.393898 0.141961
21.017721 85.330666 0.141894
21.023298 85.389877 0.141929
21.028875 85.402420 0.141925
21.034454 85.362747 0.141877
21.040031 85.631721 0.142086
21.045609 85.123062 0.141649
21.051186 84.853096 0.141410
21.056763 85.046089 0.141556
21.062340 84.730728 0.141279
21.067917 84.834648 0.141352
21.073494 84.913208 0.141403
21.079071 84.679420 0.141194
21.084648 84.666443 0.141169
21.090225 84.804298 0.141269
21.095802 84.892265 0.141328
21.101379 84.941307 0.141355
21.106956 85.271965 0.141615
21.112534 85.510796 0.141799
21.118113 86.094429 0.142268
21.123690 86.528656 0.142611
21.129267 86.838905 0.142852
21.134844 87.154251 0.143097
21.140421 86.831406 0.142817
21.145998 86.781151 0.142761
21.151575 86.535515 0.142545
21.157152 86.008118 0.142095
21.162729 85.845535 0.141947
21.168306 85.517319 0.141661
21.173883 85.378098 0.141531
21.179461 85.507492 0.141624
21.185038 85.403740 0.141524
21.190615 85.232185 0.141367
21.196192 84.992653 0.141154
21.201769 84.754852 0.140942
21.207348 84.846924 0.141004
21.212925 85.109756 0.141208
21.218502 85.164017 0.141239
21.224079 85.068230 0.141145
21.229656 85.300728 0.141324
21.235233 85.397163 0.141389
21.240810 85.602242 0.141545
21.246387 85.899849 0.141776
21.251965 85.828453 0.141703
21.257542 86.031982 0.141857
21.263119 85.975899 0.141796
21.268696 85.951149 0.141761
21.274273 85.922447 0.141723
21.279850 85.845146 0.141645
21.285427 86.148926 0.141881
21.291006 86.713516 0.142331
21.296583 87.106697 0.142639
21.302160 87.278961 0.142765
21.307737 87.931671 0.143284
21.313314 88.153465 0.143450
21.318892 88.633003 0.143825
21.324469 89.603264 0.144595
21.330046 90.261551 0.145111
21.335623 91.403740 0.146012
21.341200 92.777092 0.147089
21.346777 94.581070 0.148498
21.352354 96.614265 0.150070
21.357931 98.549904 0.151551
21.363508 100.596500 0.153101
21.369085 102.386260 0.154441
21.374664 104.077380 0.155696
21.380241 106.108290 0.157191
21.385818 108.327290 0.158811
21.391396 110.940250 0.160698
21.396973 113.979020 0.162868
21.402550 117.584920 0.165407
21.408127 121.716580 0.168271
21.413704 125.228440 0.170664
21.419281 128.467270 0.172840
21.424858 131.487300 0.174842
21.430435 133.516950 0.176168
21.436012 135.370820 0.177369
21.441589 136.760790 0.178260
21.447166 137.536760 0.178747
21.452744 138.091260 0.179089
21.458321 138.593350 0.179396
21.463900 138.535220 0.179340
21.469477 138.078870 0.179026
21.475054 137.189000 0.178431
21.480631 135.721280 0.177456
21.486208 133.888670 0.176236
21.491785 131.819170 0.174851
21.497362 129.416760 0.173233
21.502939 126.583150 0.171308
21.508516 123.582760 0.169249
21.514093 120.237090 0.166925
21.519670 117.073130 0.164698
21.525248 114.348470 0.162754
21.530825 112.369000 0.161323
21.536402 110.813430 0.160186
21.541979 109.143970 0.158959
21.547558 107.422940 0.157685
21.553135 105.633020 0.156350
21.558712 104.040710 0.155151
21.564289 102.724880 0.154151
21.569866 101.504460 0.153218
21.575443 100.338130 0.152319
21.581020 99.082664 0.151348
21.586597 97.898445 0.150426
21.592175 96.855453 0.149607
21.597752 95.934441 0.148879
21.603329 95.117996 0.148230
21.608906 93.974236 0.147321
21.614483 93.225754 0.146718
21.620060 92.458710 0.146099
21.625637 91.835236 0.145591
21.631216 91.551460 0.145351
21.636793 91.362648 0.145186
21.642370 91.355461 0.145166
21.647947 91.501755 0.145268
21.653524 91.910385 0.145577
21.659101 91.855179 0.145519
21.664679 92.275459 0.145837
21.670256 92.772041 0.146214
21.675833 93.384209 0.146681
21.681410 94.087418 0.147217
21.686987 94.755295 0.147724
21.692564 95.530327 0.148312
21.698141 96.466331 0.149022
21.703718 97.311211 0.149658
21.709295 98.013222 0.150181
21.714872 98.582932 0.150602
21.720451 98.655869 0.150643
21.726028 98.598991 0.150584
21.731606 98.554871 0.150535
21.737183 98.541794 0.150510
21.742760 98.471085 0.150441
21.748337 98.663246 0.150573
21.753914 98.971680 0.150793
21.759491 99.014122 0.150810
21.765068 99.604355 0.151244
21.770645 100.589960 0.151975
21.776222 101.752010 0.152835
21.781799 103.462410 0.154098
21.787376 105.644390 0.155699
21.792953 108.212540 0.157565
21.798531 111.355260 0.159820
21.804110 115.080020 0.162455
21.809687 119.652570 0.165634
21.815264 124.321240 0.168818
21.820841 128.590640 0.171675
21.826418 132.784390 0.174434
21.831995 135.961620 0.176491
21.837572 138.113480 0.177865
21.843149 139.225020 0.178561
21.848726 139.527940 0.178737
21.854303 139.523800 0.178717
21.859880 139.757580 0.178848
21.865458 140.575780 0.179353
21.871035 142.272630 0.180414
21.876612 144.713640 0.181937
21.882189 148.928410 0.184549
21.887768 154.592180 0.188007
21.893345 160.185420 0.191358
21.898922 165.436690 0.194450
21.904499 169.481450 0.196793
21.910076 171.528700 0.197958
21.915653 172.140670 0.198291
21.921230 170.414110 0.197275
21.926807 166.306630 0.194863
21.932384 160.514950 0.191421
21.937962 153.851100 0.187386
21.943539 146.529540 0.182855
21.949116 139.367710 0.178313
21.954693 133.070560 0.174220
21.960270 127.035290 0.170207
21.965847 121.946430 0.166746
21.971424 118.190850 0.164142
21.977003 115.559430 0.162288
21.982580 113.840550 0.161060
21.988157 113.020520 0.160463
21.993734 112.737370 0.160246
21.999311 113.302630 0.160631
22.004889 114.504710 0.161465
22.010466 116.371510 0.162759
22.016043 118.780090 0.164419
22.021620 121.424940 0.166223
22.027197 124.339920 0.168189
22.032774 126.746520 0.169792
22.038351 128.966350 0.171255
22.043928 130.521300 0.172267
22.049505 130.911880 0.172508
22.055082 130.944630 0.172512
22.060661 130.672290 0.172315
22.066238 130.336590 0.172077
22.071815 130.635250 0.172256
22.077393 130.704270 0.172285
22.082970 130.796630 0.172328
22.088547 131.210250 0.172583
22.094124 131.341130 0.172652
22.099701 132.075470 0.173117
22.105278 132.856060 0.173610
22.110855 133.908250 0.174279
22.116432 135.263310 0.175141
22.122009 136.371840 0.175840
22.127586 137.819370 0.176753
22.133163 139.252840 0.177652
22.138741 140.839000 0.178643
22.144318 142.915190 0.179937
22.149897 144.993740 0.181223
22.155474 147.948270 0.183041
22.161051 150.813550 0.184787
22.166628 154.397090 0.186951
22.172205 158.827330 0.189595
22.177782 163.675510 0.192448
22.183359 168.840300 0.195441
22.188936 173.549030 0.198128
22.194513 177.807630 0.200524
22.200090 180.213230 0.201856
22.205667 181.132610 0.202350
22.211245 180.234830 0.201828
22.216822 177.481250 0.200260
22.222399 174.316770 0.198447
22.227976 170.713470 0.196365
22.233555 166.998700 0.194198
22.239132 164.116650 0.192496
22.244709 160.954560 0.190613
22.250286 157.402330 0.188479
22.255863 153.538100 0.186133
22.261440 148.977950 0.183329
22.267017 143.810420 0.180104
22.272594 138.798750 0.176920
22.278172 133.406040 0.173432
22.283749 128.124510 0.169947
22.289326 123.079170 0.166551
22.294903 118.275510 0.163252
22.300480 114.355260 0.160508
22.306057 111.346920 0.158367
22.311634 108.589990 0.156378
22.317213 106.861970 0.155114
22.322790 106.159560 0.154588
22.328367 105.472650 0.154071
22.333944 105.473980 0.154057
22.339521 105.253810 0.153881
22.345098 104.394030 0.153236
22.350676 103.355190 0.152456
22.356253 102.221020 0.151602
22.361830 100.868100 0.150581
22.367407 99.860039 0.149812
22.372984 99.083076 0.149213
22.378561 98.933189 0.149085
22.384138 99.316719 0.149359
22.389715 99.927155 0.149802
22.395292 100.817650 0.150453
22.400869 101.875530 0.151226
22.406448 102.930140 0.151991
22.412025 103.974790 0.152745
22.417603 105.047760 0.153516
22.423180 105.810490 0.154057
22.428757 106.544460 0.154575
22.434334 107.482600 0.155239
22.439911 108.821430 0.156187
22.445488 110.362620 0.157274
22.451065 112.004670 0.158424
22.456642 113.624340 0.159549
22.462219 115.115620 0.160577
22.467796 116.191200 0.161309
22.473373 116.857460 0.161755
22.478951 116.348610 0.161386
22.484528 114.669300 0.160201
22.490107 112.063800 0.158355
22.495684 108.573030 0.155854
22.501261 105.173510 0.153379
22.506838 101.701900 0.150812
22.512415 98.666817 0.148529
22.517992 96.091469 0.146564
22.523569 93.925560 0.144888
22.529146 92.627296 0.143869
22.534723 91.601631 0.143056
22.540300 90.534622 0.142206
22.545877 89.723763 0.141554
22.551455 89.050911 0.141008
22.557032 88.563713 0.140608
22.562609 88.285629 0.140373
22.568186 88.099266 0.140211
22.573765 88.120575 0.140214
22.579342 88.252174 0.140305
22.584919 88.434242 0.140435
22.590496 89.056099 0.140914
22.596073 89.503380 0.141254
22.601650 89.773361 0.141453
22.607227 89.831902 0.141485
22.612804 89.973198 0.141582
22.618382 89.755028 0.141396
22.623959 90.054878 0.141618
22.629536 90.678955 0.142094
22.635113 91.081894 0.142395
22.640690 91.701622 0.142865
22.646267 92.132072 0.143185
22.651844 92.323135 0.143319
22.657421 92.376068 0.143346
22.663000 92.529572 0.143451
22.668577 92.767647 0.143621
22.674154 93.452133 0.144136
22.679731 93.670509 0.144290
22.685308 94.396873 0.144834
22.690886 95.198875 0.145434
22.696463 95.903618 0.145956
22.702040 97.790802 0.147371
22.707617 99.793930 0.148858
22.713194 101.882470 0.150393
22.718771 104.537730 0.152325
22.724348 107.476340 0.154435
22.729925 110.503850 0.156580
22.735502 113.554310 0.158711
22.741079 117.087920 0.161145
22.746658 120.930820 0.163752
22.752235 125.237910 0.166626
22.757813 130.103990 0.169816
22.763390 134.960270 0.172939
22.768967 138.677120 0.175287
22.774544 141.072130 0.176776
22.780121 141.692320 0.177147
22.785698 140.627590 0.176463
22.791275 138.394240 0.175039
22.796852 135.759600 0.173347
22.802429 132.727200 0.171383
22.808006 130.328260 0.169811
22.813583 128.650570 0.168698
22.819160 128.056460 0.168291
22.824738 128.478440 0.168551
22.830317 129.717240 0.169345
22.835894 132.087950 0.170869
22.841471 134.369610 0.172321
22.847048 136.069660 0.173391
22.852625 137.320530 0.174169
22.858202 137.532030 0.174286
22.863779 136.891450 0.173862
22.869356 135.443510 0.172923
22.874933 132.685360 0.171136
22.880510 128.695470 0.168527
22.886087 124.274310 0.165591
22.891665 119.358090 0.162266
22.897242 114.491840 0.158908
22.902819 110.002440 0.155746
22.908396 106.051970 0.152909
22.913973 102.500470 0.150312
22.919552 99.181961 0.147844
22.925129 96.836861 0.146071
22.930706 94.787918 0.144504
22.936283 93.420578 0.143443
22.941860 92.380989 0.142629
22.947437 91.413177 0.141866
22.953014 90.839775 0.141406
22.958591 90.228905 0.140916
22.964169 89.830322 0.140591
22.969746 89.612251 0.140406
22.975323 89.176208 0.140050
22.980900 88.952446 0.139861
22.986477 89.175903 0.140022
22.992054 89.446724 0.140221
22.997631 89.979828 0.140624
23.003210 90.273270 0.140840
23.008787 90.350945 0.140886
23.014364 90.114006 0.140688
23.019941 90.024483 0.140604
23.025518 89.969437 0.140547
23.031096 89.907913 0.140485
23.036673 89.880791 0.140450
23.042250 89.397301 0.140058
23.047827 89.000687 0.139733
23.053404 88.371758 0.139225
23.058981 87.676247 0.138662
23.064558 87.155418 0.138236
23.070135 86.320061 0.137559
23.075712 85.640015 0.137002
23.081289 85.361610 0.136766
23.086866 84.754227 0.136265
23.092445 84.308708 0.135893
23.098022 84.155457 0.135756
23.103600 84.209290 0.135786
23.109177 84.303795 0.135849
23.114754 84.782776 0.136221
23.120331 84.953316 0.136344
23.125908 84.808304 0.136214
23.131485 84.850296 0.136235
23.137062 84.927742 0.136284
23.142639 84.605423 0.136011
23.148216 84.472481 0.135891
23.153793 84.170029 0.135634
23.159370 83.546913 0.135118
23.164948 83.298164 0.134903
23.170525 82.990273 0.134641
23.176104 82.701035 0.134392
23.181681 82.453560 0.134178
23.187258 82.108704 0.133884
23.192835 82.069710 0.133839
23.198412 82.102318 0.133852
23.203989 82.118034 0.133852
23.209566 81.989426 0.133734
23.215143 82.151726 0.133853
23.220720 81.990311 0.133709
23.226297 82.111183 0.133794
23.231874 82.229576 0.133877
23.237452 81.988029 0.133667
23.243029 82.040504 0.133697
23.248606 82.033226 0.133678
23.254183 82.054909 0.133682
23.259762 81.742180 0.133414
23.265339 81.508522 0.133210
23.270916 81.265717 0.132999
23.276493 81.048065 0.132808
23.282070 81.203346 0.132922
23.287647 81.254715 0.132951
23.293224 81.365303 0.133028
23.298801 81.478317 0.133107
23.304379 81.503632 0.133115
23.309956 81.515518 0.133112
23.315533 81.360664 0.132972
23.321110 81.359428 0.132958
23.326687 81.352982 0.132940
23.332264 81.219841 0.132818
23.337841 81.324257 0.132890
23.343418 81.394821 0.132935
23.348997 81.436661 0.132956
23.354574 81.467438 0.132968
23.360151 81.186913 0.132726
23.365728 81.163078 0.132693
23.371305 80.948792 0.132505
23.376883 81.057030 0.132580
23.382460 81.134933 0.132631
23.388037 81.184677 0.132659
23.393614 81.474861 0.132883
23.399191 81.703804 0.133056
23.404768 81.717957 0.133055
23.410345 81.647232 0.132984
23.415922 81.383018 0.132756
23.421499 81.360527 0.132724
23.427076 81.277184 0.132643
23.432655 81.300522 0.132649
23.438232 81.235069 0.132583
23.443810 81.241707 0.132575
23.449387 81.315681 0.132623
23.454964 81.367058 0.132652
23.460541 81.390427 0.132658
23.466118 81.467522 0.132708
23.471695 81.524925 0.132741
23.477272 81.675575 0.132851
23.482849 81.885033 0.133008
23.488426 81.784363 0.132913
23.494003 81.924316 0.133014
23.499580 82.078926 0.133126
23.505157 82.173729 0.133190
23.510735 82.294540 0.133275
23.516314 82.478447 0.133411
23.521891 82.547058 0.133453
23.527468 82.614082 0.133494
23.533045 82.800034 0.133631
23.538622 82.702438 0.133540
23.544199 82.503174 0.133366
23.549776 82.742325 0.133546
23.555353 82.874359 0.133639
23.560930 83.400604 0.134050
23.566507 84.179756 0.134661
23.572084 84.740639 0.135096
23.577662 85.732239 0.135871
23.583239 86.879761 0.136764
23.588816 88.481857 0.138005
23.594393 90.212509 0.139335
23.599970 91.769165 0.140518
23.605549 93.684006 0.141963
23.611126 95.886223 0.143607
23.616703 97.963478 0.145140
23.622280 99.862602 0.146526
23.627857 101.048380 0.147379
23.633434 101.391670 0.147615
23.639011 100.955880 0.147283
23.644588 100.032100 0.146593
23.650166 98.586479 0.145516
23.655743 96.739822 0.144133
23.661320 95.361900 0.143088
23.666897 94.016541 0.142062
23.672474 92.955307 0.141244
23.678051 92.298050 0.140730
23.683628 91.583420 0.140170
23.689207 90.790634 0.139549
23.694784 90.189751 0.139073
23.700361 89.927902 0.138857
23.705938 89.617996 0.138604
23.711515 89.144234 0.138224
23.717093 89.127411 0.138197
23.722670 88.928558 0.138029
23.728247 89.155952 0.138192
23.733824 89.728157 0.138621
23.739401 90.264839 0.139022
23.744978 91.034363 0.139600
23.750555 91.742706 0.140128
23.756132 92.413048 0.140625
23.761709 93.025490 0.141077
23.767286 93.581200 0.141484
23.772865 94.396301 0.142085
23.778442 95.396347 0.142821
23.784019 96.796310 0.143852
23.789597 98.148506 0.144839
23.795174 99.785973 0.146028
23.800751 102.222180 0.147785
23.806328 105.214190 0.149918
23.811905 109.429560 0.152876
23.817482 114.837900 0.156593
23.823059 120.408360 0.160331
23.828636 126.405640 0.164259
23.834213 133.470210 0.168770
23.839790 139.395580 0.172459
23.845367 144.403210 0.175512
23.850945 147.124660 0.177141
23.856522 147.265950 0.177209
23.862101 145.235230 0.175966
23.867678 140.896730 0.173301
23.873255 135.255330 0.169780
23.878832 128.939770 0.165752
23.884409 122.600840 0.161611
23.889986 116.274320 0.157370
23.895563 110.994430 0.153741
23.901140 106.920560 0.150879
23.906717 104.148640 0.148895
23.912294 102.304420 0.147557
23.917871 100.877360 0.146510
23.923449 99.834404 0.145736
23.929026 98.837646 0.144993
23.934603 98.141327 0.144467
23.940180 97.632980 0.144079
23.945759 97.585037 0.144029
23.951336 98.164375 0.144442
23.956913 99.313553 0.145271
23.962490 101.185740 0.146620
23.968067 103.534450 0.148297
23.973644 106.442090 0.150350
23.979221 109.257950 0.152311
23.984798 112.246800 0.154366
23.990376 114.629110 0.155980
23.995953 116.582340 0.157288
24.001530 118.141210 0.158321
24.007107 118.841550 0.158774
24.012684 119.045430 0.158894
24.018261 118.815530 0.158726
24.023838 118.187780 0.158290
24.029417 117.659850 0.157921
24.034994 116.653300 0.157229
24.040571 115.216390 0.156242
24.046148 113.390570 0.154984
24.051725 110.936740 0.153283
24.057302 108.714810 0.151726
24.062880 106.252200 0.149983
24.068457 104.161290 0.148485
24.074034 101.891620 0.146845
24.079611 99.446884 0.145058
24.085188 97.393387 0.143539
24.090765 95.529312 0.142145
24.096342 94.248909 0.141175
24.101919 93.095329 0.140295
24.107496 91.776810 0.139284
24.113073 90.728119 0.138473
24.118652 89.312531 0.137375
24.124229 88.098465 0.136425
24.129807 86.920959 0.135497
24.135384 85.723267 0.134547
24.140961 84.863640 0.133858
24.146538 84.294601 0.133395
24.152115 83.855194 0.133034
24.157692 83.510727 0.132748
24.163269 83.170273 0.132464
24.168846 83.099388 0.132395
24.174423 83.113083 0.132393
24.180000 82.993118 0.132285
24.185577 83.215515 0.132449
24.191154 83.096901 0.132342
24.196732 83.013260 0.132262
24.202311 83.179367 0.132382
24.207888 83.061134 0.132275
24.213465 83.192352 0.132366
24.219042 83.392990 0.132513
24.224619 83.231796 0.132372
24.230196 83.281876 0.132399
24.235773 83.395309 0.132476
24.241350 83.727715 0.132727
24.246927 84.510345 0.133333
24.252504 85.096046 0.133782
24.258081 85.574341 0.134144
24.263659 86.124458 0.134561
24.269236 86.683640 0.134985
24.274813 87.754509 0.135803
24.280390 89.057869 0.136794
24.285967 89.831108 0.137373
24.291546 90.443871 0.137828
24.297123 90.678352 0.137993
24.302700 90.913330 0.138158
24.308277 91.299774 0.138438
24.313854 91.957314 0.138922
24.319431 92.417702 0.139256
24.325008 93.033066 0.139706
24.330585 93.597260 0.140115
24.336163 94.311852 0.140635
24.341740 95.604538 0.141582
24.347317 97.597656 0.143037
24.352894 100.163960 0.144891
24.358471 103.334250 0.147152
24.364048 107.089650 0.149787
24.369625 111.751070 0.152998
24.375204 117.332760 0.156757
24.380781 124.051700 0.161167
24.386358 131.194550 0.165726
24.391935 138.896820 0.170505
24.397512 146.353730 0.175005
24.403090 153.036180 0.178939
24.408667 157.475140 0.181498
24.414244 158.741850 0.182209
24.419821 156.777730 0.181061
24.425398 151.896410 0.178203
24.430975 145.419740 0.174345
24.436552 137.645510 0.169604
24.442129 129.394230 0.164426
24.447706 121.619390 0.159395
24.453283 114.407360 0.154581
24.458862 108.450690 0.150489
24.464439 103.940930 0.147313
24.470016 100.119450 0.144565
24.475594 97.060623 0.142326
24.481171 94.460480 0.140393
24.486748 92.234535 0.138716
24.492325 91.008018 0.137777
24.497902 90.057327 0.137042
24.503479 89.628220 0.136702
24.509056 89.051056 0.136248
24.514633 88.670067 0.135943
24.520210 88.785477 0.136019
24.525787 88.865852 0.136067
24.531364 88.813828 0.136014
24.536942 89.049759 0.136182
24.542519 89.375900 0.136418
24.548098 89.873497 0.136784
24.553675 90.511650 0.137255
24.559252 90.957161 0.137579
24.564829 90.907394 0.137528
24.570406 90.433220 0.137156
24.575983 90.088158 0.136881
24.581560 89.377548 0.136327
24.587137 88.878677 0.135933
24.592714 88.693550 0.135778
24.598291 88.165413 0.135360
24.603868 88.270744 0.135428
24.609446 89.050018 0.136011
24.615023 89.831131 0.136593
24.620600 91.343872 0.137725
24.626177 93.159790 0.139074
24.631756 95.694206 0.140940
24.637333 99.720764 0.143861
24.642910 104.951500 0.147571
24.648487 111.448140 0.152055
24.654064 118.991810 0.157102
24.659641 127.434560 0.162564
24.665218 136.193390 0.168042
24.670795 144.421200 0.173027
24.676373 150.117250 0.176389
24.681950 152.517230 0.177776
24.687527 150.576750 0.176625
24.693104 145.182420 0.173416
24.698681 137.712490 0.168879
24.704258 128.995730 0.163431
24.709835 120.388500 0.157870
24.715414 112.550740 0.152629
24.720991 105.906460 0.148042
24.726568 100.613010 0.144281
24.732145 96.657578 0.141402
24.737722 93.427567 0.139006
24.743299 90.852959 0.137064
24.748877 88.796951 0.135492
24.754454 86.863617 0.133996
24.760031 85.522194 0.132944
24.765608 84.266853 0.131952
24.771185 83.413086 0.131269
24.776762 83.063705 0.130982
24.782339 82.815285 0.130773
24.787916 82.552719 0.130553
24.793493 82.056061 0.130147
24.799070 81.838203 0.129962
24.804649 82.291199 0.130309
24.810226 82.947647 0.130815
24.815804 83.645187 0.131351
24.821381 84.264061 0.131823
24.826958 84.954605 0.132350
24.832535 85.656334 0.132882
24.838112 86.759323 0.133722
24.843689 87.483864 0.134267
24.849266 88.663841 0.135156
24.854843 90.606033 0.136615
24.860420 92.404961 0.137952
24.865997 94.370415 0.139398
24.871574 96.081741 0.140643
24.877151 96.493141 0.140930
24.882729 96.864716 0.141187
24.888308 96.605270 0.140985
24.893885 95.807007 0.140387
24.899462 95.057304 0.139824
24.905039 94.068077 0.139081
24.910616 92.810623 0.138135
24.916193 91.222229 0.136935
24.921770 89.847458 0.135886
24.927347 88.283989 0.134685
24.932924 86.796524 0.133533
24.938501 85.829353 0.132774
24.944078 84.845490 0.131999
24.949656 84.132111 0.131430
24.955233 83.733871 0.131106
24.960810 83.310127 0.130761
24.966387 82.920311 0.130442
24.971966 82.769646 0.130311
24.977543 82.702110 0.130246
24.983120 82.533859 0.130101
24.988697 82.423706 0.130001
24.994274 82.588585 0.130119
24.999851 82.781189 0.130258
25.005428 82.863914 0.130311
25.011005 83.255684 0.130606
25.016582 83.796753 0.131017
25.022160 84.558601 0.131599
25.027737 86.288124 0.132925
25.033314 87.865440 0.134122
25.038891 89.845345 0.135611
25.044468 92.510635 0.137595
25.050045 95.162682 0.139540
25.055622 98.143738 0.141695
25.061201 101.079640 0.143785
25.066778 103.522470 0.145498
25.072355 105.062160 0.146562
25.077932 105.705030 0.146996
25.083509 105.562060 0.146882
25.089087 104.359670 0.146029
25.094664 102.729930 0.144871
25.100241 100.222890 0.143078
25.105818 97.037010 0.140773
25.111395 94.082420 0.138600
25.116972 91.255928 0.136489
25.122549 88.915977 0.134715
25.128126 87.350365 0.133511
25.133703 85.979774 0.132446
25.139280 84.853989 0.131564
25.144859 83.909042 0.130817
25.150436 83.134155 0.130199
25.156013 82.863426 0.129974
25.161591 82.890656 0.129983
25.167168 83.486938 0.130437
25.172745 84.332138 0.131083
25.178322 84.967407 0.131564
25.183899 86.193550 0.132497
25.189476 87.780640 0.133698
25.195053 89.666618 0.135114
25.200630 92.033524 0.136873
25.206207 94.197311 0.138459
25.211784 95.865013 0.139666
25.217361 96.789291 0.140324
25.222939 97.233505 0.140633
25.228516 96.747963 0.140268
25.234095 96.060944 0.139755
25.239672 95.131737 0.139065
25.245249 94.199501 0.138368
25.250826 92.493095 0.137096
25.256403 91.136826 0.136074
25.261980 89.972977 0.135190
25.267557 88.239998 0.133869
25.273134 87.206879 0.133070
25.278711 85.735382 0.131930
25.284288 84.288521 0.130800
25.289865 83.779373 0.130392
25.295443 83.382950 0.130070
25.301020 83.055939 0.129803
25.306597 82.685471 0.129500
25.312174 82.417389 0.129278
25.317753 82.059616 0.128985
25.323330 81.642578 0.128644
25.328907 81.187965 0.128273
25.334484 80.734222 0.127902
25.340061 80.527328 0.127726
25.345638 80.283730 0.127521
25.351215 80.064804 0.127335
25.356792 79.854492 0.127155
25.362370 79.932144 0.127205
25.367947 80.034836 0.127274
25.373524 79.835297 0.127103
25.379101 79.750168 0.127024
25.384678 79.986130 0.127199
25.390255 80.219193 0.127372
25.395832 80.635941 0.127691
25.401411 81.148582 0.128084
25.406988 81.206024 0.128117
25.412565 81.568291 0.128390
25.418142 82.085205 0.128784
25.423719 82.427628 0.129040
25.429296 82.837090 0.129348
25.434874 83.231003 0.129643
25.440451 83.405724 0.129766
25.446028 83.367805 0.129724
25.451605 83.903320 0.130128
25.457182 84.589233 0.130646
25.462759 85.189758 0.131097
25.468336 86.199600 0.131859
25.473913 87.015198 0.132469
25.479490 88.144714 0.133313
25.485067 90.230919 0.134869
25.490646 92.339439 0.136422
25.496223 94.332809 0.137874
25.501801 96.781990 0.139639
25.507378 98.844345 0.141106
25.512955 100.859830 0.142523
25.518532 102.912180 0.143952
25.524109 104.044010 0.144728
25.529686 104.556910 0.145071
25.535263 104.509520 0.145024
25.540840 104.052340 0.144693
25.546417 103.652820 0.144401
25.551994 103.187350 0.144063
25.557571 102.903630 0.143851
25.563148 102.908940 0.143841
25.568726 102.508510 0.143547
25.574305 103.331990 0.144109
25.579882 104.460030 0.144879
25.585459 105.440900 0.145544
25.591036 107.127680 0.146690
25.596613 108.118130 0.147352
25.602190 109.172040 0.148055
25.607767 110.062620 0.148643
25.613344 110.463940 0.148900
25.618921 110.804340 0.149115
25.624498 110.203230 0.148696
25.630075 109.811600 0.148417
25.635653 108.409520 0.147453
25.641230 106.929250 0.146429
25.646807 104.950500 0.145054
25.652384 102.800220 0.143547
25.657963 100.927570 0.142220
25.663540 98.976891 0.140825
25.669117 97.743607 0.139932
25.674694 95.849785 0.138556
25.680271 94.147102 0.137307
25.685848 92.887451 0.136373
25.691425 91.218796 0.135129
25.697002 90.088005 0.134276
25.702579 88.997322 0.133448
25.708157 88.045586 0.132720
25.713734 87.402771 0.132222
25.719311 87.157112 0.132024
25.724888 87.111237 0.131977
25.730465 87.110748 0.131964
25.736042 87.160522 0.131989
25.741619 87.088593 0.131922
25.747198 87.174431 0.131975
25.752775 87.350021 0.132095
25.758352 88.015060 0.132584
25.763929 88.204063 0.132714
25.769506 88.349159 0.132810
25.775084 88.461136 0.132882
25.780661 88.136658 0.132626
25.786238 88.429520 0.132833
25.791815 88.879623 0.133158
25.797392 89.118546 0.133324
25.802969 88.839775 0.133103
25.808546 88.714882 0.132997
25.814123 88.584221 0.132886
25.819700 88.502762 0.132813
25.825277 88.513077 0.132808
25.830856 88.194061 0.132556
25.836433 87.329704 0.131892
25.842010 86.744598 0.131437
25.847588 86.170273 0.130989
25.853165 85.236618 0.130265
25.858742 84.742432 0.129874
25.864319 84.405739 0.129604
25.869896 84.176094 0.129415
25.875473 84.738953 0.129835
25.881050 85.484360 0.130392
25.886627 86.241310 0.130956
25.892204 87.050392 0.131556
25.897781 87.411026 0.131816
25.903358 88.340683 0.132503
25.908936 89.115685 0.133070
25.914515 89.601639 0.133420
25.920092 90.098724 0.133777
25.925669 90.639900 0.134165
25.931246 90.694618 0.134193
25.936823 90.845840 0.134292
25.942400 90.252380 0.133840
25.947977 89.590843 0.133336
25.953554 89.554291 0.133296
25.959131 89.770447 0.133445
25.964708 90.727066 0.134141
25.970285 91.759514 0.134889
25.975863 93.113686 0.135868
25.981440 94.584991 0.136925
25.987017 96.835464 0.138531
25.992594 99.108078 0.140134
25.998171 101.523250 0.141818
26.003750 104.116200 0.143604
26.009327 106.898220 0.145496
26.014904 110.064850 0.147621
26.020481 113.047840 0.149594
26.026058 115.453860 0.151163
26.031635 116.595960 0.151895
26.037212 116.901630 0.152079
26.042789 116.073210 0.151525
26.048367 114.450530 0.150448
26.053944 112.419490 0.149093
26.059521 109.618480 0.147210
26.065098 107.139890 0.145523
26.070675 104.164690 0.143474
26.076252 101.468870 0.141592
26.081829 99.358856 0.140099
26.087408 96.579407 0.138113
26.092985 94.985733 0.136956
26.098562 93.363525 0.135768
26.104139 92.378563 0.135037
26.109716 91.721191 0.134543
26.115294 90.867218 0.133903
26.120871 90.087677 0.133315
26.126448 89.463463 0.132840
26.132025 89.117409 0.132570
26.137602 89.650581 0.132953
26.143179 90.115555 0.133285
26.148756 91.413727 0.134229
26.154333 92.466988 0.134987
26.159910 93.445206 0.135687
26.165487 95.209579 0.136949
26.171066 97.072800 0.138269
26.176643 98.822678 0.139497
26.182220 101.184710 0.141141
26.187798 102.966370 0.142365
26.193375 105.553000 0.144128
26.198952 108.260540 0.145951
26.204529 110.745180 0.147603
26.210106 112.739910 0.148912
26.215683 113.901280 0.149663
26.221260 114.749060 0.150205
26.226837 114.759320 0.150197
26.232414 114.501050 0.150014
26.237991 114.191040 0.149797
26.243568 113.278500 0.149183
26.249146 111.485650 0.147984
26.254723 109.247690 0.146477
26.260302 106.544190 0.144640
26.265879 103.606330 0.142618
26.271456 101.282970 0.140997
26.277033 99.103149 0.139458
26.282610 96.689789 0.137737
26.288187 94.961922 0.136488
26.293764 92.968590 0.135035
26.299341 91.547401 0.133986
26.304918 90.697380 0.133350
26.310495 89.941582 0.132781
26.316072 89.609154 0.132523
26.321650 89.060196 0.132104
26.327227 88.532707 0.131700
26.332804 87.971939 0.131270
26.338381 87.020195 0.130545
26.343960 87.074684 0.130574
26.349537 87.341896 0.130762
26.355114 88.376350 0.131522
26.360691 89.129234 0.132068
26.366268 90.128189 0.132794
26.371845 91.425522 0.133734
26.377422 93.087990 0.134931
26.382999 94.223244 0.135739
26.388577 95.397896 0.136569
26.394154 97.022438 0.137714
26.399731 99.171867 0.139218
26.405308 102.184620 0.141304
26.410885 104.559570 0.142923
26.416462 106.823580 0.144449
26.422039 109.042770 0.145928
26.427616 110.333720 0.146775
26.433195 111.707170 0.147672
26.438772 112.788910 0.148371
26.444349 113.718050 0.148967
26.449926 115.065440 0.149833
26.455503 115.343950 0.150000
26.461081 115.206800 0.149897
26.466658 114.835110 0.149641
26.472235 113.792880 0.148946
26.477812 113.398120 0.148674
26.483389 112.667790 0.148181
26.488966 111.270450 0.147245
26.494543 109.282390 0.145910
26.500120 106.987370 0.144356
26.505697 104.821730 0.142874
26.511274 102.258130 0.141103
26.516853 99.969040 0.139502
26.522430 96.914238 0.137341
26.528008 94.534698 0.135632
26.533585 92.290665 0.134000
26.539162 90.123985 0.132405
26.544739 88.336205 0.131073
26.550316 87.097359 0.130138
26.555893 86.090279 0.129372
26.561470 85.380669 0.128825
26.567047 84.805626 0.128379
26.572624 83.644943 0.127485
26.578201 82.921928 0.126921
26.583778 83.035851 0.126996
26.589355 83.259354 0.127155
26.594933 83.986137 0.127697
26.600512 84.786179 0.128292
26.606089 84.897751 0.128364
26.611666 86.039696 0.129213
26.617243 86.913071 0.129854
26.622820 87.794930 0.130499
26.628397 89.585434 0.131811
26.633974 90.725082 0.132634
26.639551 91.491653 0.133181
26.645128 91.627708 0.133268
26.650705 91.478935 0.133147
26.656282 91.163651 0.132905
26.661860 91.582817 0.133198
26.667437 91.146980 0.132868
26.673014 90.744537 0.132562
26.678591 90.308342 0.132230
26.684168 89.348701 0.131514
26.689747 89.409805 0.131546
26.695324 89.180893 0.131366
26.700901 89.321129 0.131456
26.706478 89.144218 0.131314
26.712055 88.551201 0.130864
26.717632 87.839684 0.130325
26.723209 87.776604 0.130266
26.728786 87.830276 0.130294
26.734364 88.516785 0.130790
26.739941 89.130272 0.131230
26.745518 89.173691 0.131250
26.751095 89.235970 0.131283
26.756672 89.100143 0.131171
26.762249 88.597816 0.130789
26.767826 88.206123 0.130487
26.773405 87.120468 0.129669
26.778982 85.774338 0.128652
26.784559 84.821030 0.127923
26.790136 83.966911 0.127265
26.795713 83.635773 0.127002
26.801291 83.382622 0.126798
26.806868 83.693268 0.127022
26.812445 83.664490 0.126988
26.818022 83.568199 0.126903
26.823599 82.684593 0.126219
26.829176 82.310555 0.125921
26.834753 82.665123 0.126180
26.840330 83.576981 0.126863
26.845907 84.585289 0.127614
26.851484 85.655258 0.128406
26.857063 85.629105 0.128375
26.862640 86.252274 0.128829
26.868217 86.234718 0.128804
26.873795 86.152168 0.128730
26.879372 87.037971 0.129378
26.884949 87.042374 0.129369
26.890526 87.178200 0.129458
26.896103 86.978210 0.129298
26.901680 86.139427 0.128661
26.907257 85.065308 0.127844
26.912834 84.289116 0.127247
26.918411 83.998802 0.127016
26.923988 84.475891 0.127365
26.929565 85.279282 0.127957
26.935143 85.014877 0.127746
26.940720 84.578262 0.127406
26.946299 84.335159 0.127211
26.951876 84.166786 0.127072
26.957453 84.862411 0.127584
26.963030 85.535492 0.128077
26.968607 85.920982 0.128354
26.974184 86.857475 0.129039
26.979761 88.055817 0.129914
26.985338 89.963654 0.131302
26.990915 92.363335 0.133029
26.996492 95.425308 0.135204
27.002069 97.857323 0.136903
27.007647 99.106705 0.137761
27.013224 100.903120 0.138991
27.018801 102.730430 0.140231
27.024378 105.849510 0.142331
27.029957 109.957920 0.145053
27.035534 112.688470 0.146829
27.041111 115.994800 0.148954
27.046688 118.261610 0.150388
27.052265 120.926860 0.152059
27.057842 123.590200 0.153710
27.063419 126.165170 0.155289
27.068996 128.211070 0.156528
27.074574 129.117430 0.157066
27.080151 129.262340 0.157140
27.085728 128.518370 0.156672
27.091305 128.678040 0.156755
27.096882 128.917110 0.156886
27.102459 128.019870 0.156324
27.108036 125.524860 0.154779
27.113615 121.795170 0.152448
27.119192 118.377690 0.150280
27.124769 115.462670 0.148405
27.130346 112.545650 0.146504
27.135923 109.970190 0.144805
27.141500 107.239770 0.142983
27.147078 105.361630 0.141712
27.152655 102.897360 0.140032
27.158232 100.972090 0.138703
27.163809 98.833138 0.137213
27.169386 97.477570 0.136256
27.174963 96.427826 0.135508
27.180540 94.707695 0.134281
27.186117 92.400429 0.132623
27.191694 89.577835 0.130570
27.197271 87.403084 0.128963
27.202850 85.475616 0.127521
27.208427 84.074310 0.126460
27.214005 83.223335 0.125806
27.219582 81.839455 0.124745
27.225159 80.962746 0.124063
27.230736 79.757156 0.123124
27.236313 78.677826 0.122277
27.241890 78.405411 0.122054
27.247467 78.446465 0.122075
27.253044 78.926903 0.122436
27.258621 78.681198 0.122234
27.264198 78.166756 0.121823
27.269775 77.263657 0.121106
27.275352 75.774658 0.119922
27.280930 74.676369 0.119039
27.286509 73.664772 0.118219
27.292086 73.392853 0.117989
27.297663 74.016441 0.118479
27.303240 74.989418 0.119244
27.308817 75.240089 0.119432
27.314394 74.718590 0.119006
27.319971 74.201553 0.118583
27.325548 74.496620 0.118807
27.331125 74.755325 0.119002
27.336702 74.992546 0.119180
27.342279 74.091370 0.118451
27.347857 71.803688 0.116597
27.353434 72.064354 0.116797
27.359011 72.400948 0.117059
27.364588 74.137070 0.118443
27.370165 75.381348 0.119422
27.375744 75.382881 0.119412
27.381321 75.301140 0.119336
27.386898 74.124153 0.118389
27.392475 74.160393 0.118407
27.398052 74.522598 0.118685
