# Supplementary material for: Structural insight into cocrystallization with zwitterionic co-formers: cocrystals of S-naproxen
Source: Royal Society of Chemistry journal article supplement (doi:10.1039/c4ce00353e), 2014-05-13
Supplement: c4ce00353e3.dat [file c4ce00353e3.dat]

        0.23560000     1986.375075879827         121.1319995440300    
        0.23940000     1975.617206154136         30.15810653658027    
        0.24320000     1657.893588778736         25.19466964381345    
        0.24700000     1464.343993753831         21.12708497182232    
        0.25080000     1314.855705328154         18.00364720280947    
        0.25460000     1215.050900346197         11.16325274980880    
        0.25840000     1197.854057945836         11.20760964110328    
        0.26220000     1196.719768339225         10.90270937063169    
        0.26600000     1211.779599832729         11.45593688903928    
        0.26980000     1200.974656831105         11.14927256392068    
        0.27360000     1227.882947105462         11.32161208522380    
        0.27740000     1233.993521572622         13.43112646839422    
        0.28120000     1274.044684365819         11.70122827988495    
        0.28500000     1283.370041907671         11.79898585401071    
        0.28880000     1286.943040471696         11.88451037293482    
        0.29260000     1293.944377053577         11.79317033407539    
        0.29640000     1309.311672114713         12.03342149680651    
        0.30020000     1328.013769618146         12.10355226856848    
        0.30400000     1352.962054988399         12.49031077750582    
        0.30780000     1365.311342918024         12.34801072552674    
        0.31160000     1370.486573422272         12.58685122015741    
        0.31540000     1382.091339877202         15.51976088539669    
        0.31920000     1408.820790073955         12.66635084344541    
        0.32300000     1399.796458593877         15.04765314033125    
        0.32680000     1423.466119378894         12.91412191799563    
        0.33060000     1419.478027926858         13.52297223262154    
        0.33440000     1446.531826510867         12.95683422363057    
        0.33820000     1458.174908517803         13.10987215202503    
        0.34200000     1463.692804901459         13.19216143076821    
        0.34580000     1479.810869828541         13.16944052064548    
        0.34960000     1489.886011338204         13.15076441168914    
        0.35340000     1498.323168655841         13.52791552630124    
        0.35720000     1500.282477496323         13.45239293158310    
        0.36100000     1512.117469251686         13.34379694804722    
        0.36480000     1519.161194312324         13.33061760501813    
        0.36860000     1535.528899776230         13.85011723627564    
        0.37240000     1555.114376874644         13.88624254408595    
        0.37620000     1568.236330940490         14.03553484677810    
        0.38000000     1566.955040093795         14.06375003798790    
        0.38380000     1569.202757056700         16.30418996777221    
        0.38760000     1585.919791336086         14.00015818901942    
        0.39140000     1596.150061387101         14.99653580357866    
        0.39520000     1613.762492095094         14.31557874603442    
        0.39900000     1622.368628303131         14.33600705212005    
        0.40280000     1629.907203093159         14.38909931492987    
        0.40660000     1632.269022279941         14.45664944472140    
        0.41040000     1643.184773758541         14.39782909300320    
        0.41420000     1643.558998822642         14.39121515028672    
        0.41800000     1642.416840787014         14.37144159140853    
        0.42180000     1650.881581454650         14.49571286333943    
        0.42560000     1662.827308740040         14.67466575310490    
        0.42940000     1674.727772055808         14.49539142003401    
        0.43320000     1670.698654838351         14.38449304091566    
        0.43700000     1676.825045454277         14.53488189625287    
        0.44080000     1675.754827190086         14.52196615314073    
        0.44460000     1693.108813655395         15.59612556849233    
        0.44840000     1688.288828879121         14.79938541693728    
        0.45220000     1704.274797703639         16.21030814379194    
        0.45600000     1713.781330604086         15.12295814617769    
        0.45980000     1712.549523048155         15.01298634471639    
        0.46360000     1713.525693894468         15.12178021760871    
        0.46740000     1718.891839847412         14.86604147102061    
        0.47120000     1715.341086243596         14.66321202336418    
        0.47500000     1730.373423470824         14.92725014462589    
        0.47880000     1741.382354969028         15.23363889096816    
        0.48260000     1743.729842494187         15.22659914467721    
        0.48640000     1748.221856068113         15.36893664685336    
        0.49020000     1750.620968562634         15.27435403429693    
        0.49400000     1742.924231737322         15.22293368886972    
        0.49780000     1742.709470783927         15.33956434230139    
        0.50160000     1761.652268647964         15.25097148457560    
        0.50540000     1763.460500094845         15.17783957807615    
        0.50920000     1762.966683394768         15.33616183099823    
        0.51300000     1780.037981290349         15.28992434254735    
        0.51680000     1778.112299806572         15.56256652798702    
        0.52060000     1794.424331210828         15.61574633059631    
        0.52440000     1806.533366403319         15.59740706408804    
        0.52820000     1785.758331175005         15.37248903186709    
        0.53200000     1807.139066848245         15.51656650761735    
        0.53580000     1782.791412074819         15.74771974613249    
        0.53960000     1843.444494189394         19.30855668216176    
        0.54340000     1842.107123343362         13.87042017342490    
        0.54720000     1854.331965194370         16.52372280798038    
        0.55100000     1849.089990136793         16.26574326468764    
        0.55480000     1847.710211449393         11.22626613171624    
        0.55860000     1855.664602218323         11.47718917706150    
        0.56240000     1858.603721891688         11.16015925465499    
        0.56620000     1841.473282781173         12.44835023462809    
        0.57000000     1854.759924681912         11.28575116870198    
        0.57380000     1868.745945511515         13.82458925533247    
        0.57760000     1868.513244999952         12.48504489744624    
        0.58140000     1883.192523956269         15.13536342234197    
        0.58520000     1868.518047003914         14.29214626265730    
        0.58900000     1877.555207155362         14.89619987164868    
        0.59280000     1877.612711514220         13.90739090588947    
        0.59660000     1898.635489759277         16.04883934175696    
        0.60040000     1894.994936679702         12.74264558445717    
        0.60420000     1885.954803934886         11.56533671758410    
        0.60800000     1882.714415971324         14.00082728324005    
        0.61180000     1894.383725750383         15.12711592524638    
        0.61560000     1897.176468416666         14.32417168183936    
        0.61940000     1911.996123436053         16.61395766627104    
        0.62320000     1898.026541208816         14.02008891495941    
        0.62700000     1923.567989826862         16.90414346661193    
        0.63080000     1902.881320618264         12.72850568825862    
        0.63460000     1922.810755907542         16.23822742176960    
        0.63840000     1927.753943885168         15.56276842839884    
        0.64220000     1915.718831573164         14.63195215165995    
        0.64600000     1927.491195239914         14.63915965725162    
        0.64980000     1929.597612541123         14.29718651180117    
        0.65360000     1926.543790235351         15.81364737914027    
        0.65740000     1933.920093606032         17.53257847704570    
        0.66120000     1945.514556336128         18.06579286451327    
        0.66500000     1933.304363398058         14.10996604262034    
        0.66880000     1934.725711840148         15.50515529256687    
        0.67260000     1948.361647094553         15.94439725117299    
        0.67640000     1946.274034170469         16.40264136063782    
        0.68020000     1951.177805021065         17.22447008532689    
        0.68400000     1942.629604452363         14.79423218276203    
        0.68780000     1952.498789002901         16.35293428316073    
        0.69160000     1951.077278888978         15.20309081805834    
        0.69540000     1965.651716708970         17.17907463460356    
        0.69920000     1962.559062523841         18.38355448702993    
        0.70300000     1963.727482310789         17.13318874931909    
        0.70680000     1967.374513576426         14.91590450340228    
        0.71060000     1969.047015376270         15.95666652201007    
        0.71440000     1977.420179046896         17.09780151945047    
        0.71820000     1971.435056307562         14.88124252179755    
        0.72200000     1973.392689533945         16.28682676198357    
        0.72580000     1973.838490634736         17.85017358684569    
        0.72960000     1977.518395573804         16.80215092232628    
        0.73340000     1976.337401557944         15.93600731910276    
        0.73720000     1977.650701575699         15.47180222820361    
        0.74100000     1984.488635262968         13.28890716647170    
        0.74480000     1986.528896104514         16.18460548150651    
        0.74860000     1984.929943075152         16.98317190973832    
        0.75240000     1985.841013179493         15.50618705812957    
        0.75620000     1990.301057097636         14.41751128133018    
        0.76000000     1999.120324824567         15.55597785321093    
        0.76380000     2000.217207700232         16.88393534447878    
        0.76760000     1993.455434055117         16.17173597802654    
        0.77140000     1999.413853155152         15.13824906157326    
        0.77520000     2004.268942004637         16.37821977271677    
        0.77900000     2008.343062328792         16.09234552995959    
        0.78280000     1996.868529612035         15.64056635853026    
        0.78660000     2001.476405703350         16.58094506569997    
        0.79040000     2005.680117269822         14.89218586586959    
        0.79420000     2001.138147545824         12.11058123203026    
        0.79800000     2003.681143720813         12.18530633699322    
        0.80180000     2010.364158291282         12.59304270495955    
        0.80560000     2011.619496458401         12.49271495462413    
        0.80940000     2016.702735709075         14.29666919713615    
        0.81320000     2009.959026253993         12.97307852381336    
        0.81700000     2015.756378943330         12.14278396874940    
        0.82080000     2018.035012999565         15.76199425002587    
        0.82460000     2018.362241220647         17.61815278064526    
        0.82840000     2019.515129479146         15.29153426756490    
        0.83220000     2031.572587652581         13.46826317614311    
        0.83600000     2030.207359001064         12.25499711748710    
        0.83980000     2065.240739248793         17.33785770148603    
        0.84360000     2050.220722024485         15.23625107313908    
        0.84740000     2064.604814786962         16.56260281965451    
        0.85120000     2055.563419836868         14.31344989339091    
        0.85500000     2060.532319345599         13.43047696490706    
        0.85880000     2053.604794123705         13.26723624484226    
        0.86260000     2059.318659328353         13.05383907284254    
        0.86640000     2060.599365349608         11.48766965235303    
        0.87020000     2056.474229590857         10.32514889172420    
        0.87400000     2057.095718780361         13.14393454084971    
        0.87780000     2060.522766054923         13.55798955097330    
        0.88160000     2063.928617586046         14.62940732367189    
        0.88540000     2061.209961241135         13.04004726538574    
        0.88920000     2061.253511871891         14.07797837072046    
        0.89300000     2065.880693386084         11.60194259839251    
        0.89680000     2070.188978354226         14.34437009129628    
        0.90060000     2063.253761093383         11.24915771629645    
        0.90440000     2075.410590031651         12.62333353379826    
        0.90820000     2075.257492216909         13.66045552209068    
        0.91200000     2068.927564702980         14.01412941159556    
        0.91580000     2074.385775094384         14.93698043123188    
        0.91960000     2072.519870877898         15.87909474790434    
        0.92340000     2072.487102584804         13.24345681621954    
        0.92720000     2079.375854260661         13.82140820152717    
        0.93100000     2078.208702083244         13.61254419410639    
        0.93480000     2088.842273208714         14.36759678305952    
        0.93860000     2090.827058648321         14.06472608191482    
        0.94240000     2076.676777801758         14.20735054541782    
        0.94620000     2086.906603968205         13.25037854972382    
        0.95000000     2082.744610822997         12.50332431638870    
        0.95380000     2085.922207682197         13.43131665499858    
        0.95760000     2092.199064761638         13.80769498182871    
        0.96140000     2086.615406000469         13.79938882104566    
        0.96520000     2088.483116980743         13.44416121359717    
        0.96900000     2093.481481786023         12.81139331903739    
        0.97280000     2094.986753571706         13.20393275448270    
        0.97660000     2099.087300116602         14.14580035304252    
        0.98040000     2093.526676757321         14.78234264044143    
        0.98420000     2099.162480409248         13.58117275923067    
        0.98800000     2096.074411061762         14.96526150475547    
        0.99180000     2093.963816761976         14.32196314212314    
        0.99560000     2097.957971438494         13.27750323228243    
        0.99940000     2103.364103760659         14.36686716589918    
        1.00320000     2107.324163272652         14.13387048320585    
        1.00700000     2104.380262112516         13.95790217484594    
        1.01080000     2105.464682805464         15.11231685565049    
        1.01460000     2108.659315140161         14.32436758924016    
        1.01840000     2101.633288158843         13.18125937464517    
        1.02220000     2100.062530072378         13.38474850776329    
        1.02600000     2108.330952647407         14.18136187751097    
        1.02980000     2116.328511805098         13.67608968573956    
        1.03360000     2115.538544005447         13.35474519528064    
        1.03740000     2114.294066682954         13.89696776596873    
        1.04120000     2112.655785467897         12.78604638601341    
        1.04500000     2128.554259112386         13.13485965452907    
        1.04880000     2129.062484244476         13.92416700975687    
        1.05260000     2124.320957859627         14.15468562030376    
        1.05640000     2126.738669873846         13.54805682537278    
        1.06020000     2142.909508849662         13.07285568435612    
        1.06400000     2142.071129690212         12.97572106883171    
        1.06780000     2143.537888749450         12.94948673206128    
        1.07160000     2149.463094034221         12.84216101127612    
        1.07540000     2152.861860949986         11.92887258194726    
        1.07920000     2163.482249439639         12.34149133012728    
        1.08300000     2178.123610509238         13.11591097823293    
        1.08680000     2190.331709126610         12.56101314343105    
        1.09060000     2191.352543177919         11.76431029772588    
        1.09440000     2190.968549370392         10.75006174206368    
        1.09820000     2199.864136451925         10.71357934878102    
        1.10200000     2215.764476755047         11.48433057313879    
        1.10580000     2213.932842118938         11.75817254461203    
        1.10960000     2222.868388635468         12.22598825775223    
        1.11340000     2235.578706972392         11.05097364994925    
        1.11720000     2240.354526981946         10.86237471227572    
        1.12100000     2241.453972289302         10.83847403444470    
        1.12480000     2255.414841007935         14.62206709221932    
        1.12860000     2254.677994313800         11.83234937577117    
        1.13240000     2272.356359671458         11.75700943600524    
        1.13620000     2277.246627852351         11.08544320815957    
        1.14000000     2321.601902517526         15.29755243494215    
        1.14380000     2319.111659932038         15.26467534630308    
        1.14760000     2331.999252201992         15.34465418046373    
        1.15140000     2330.738141462475         12.59943308896210    
        1.15520000     2341.102359381382         13.13830677011130    
        1.15900000     2340.099893228402         12.40430013436455    
        1.16280000     2344.460557665073         13.54717247868910    
        1.16660000     2354.645903688206         12.77510439378127    
        1.17040000     2357.253438471059         12.00001021927937    
        1.17420000     2371.537096998548         12.74255875237213    
        1.17800000     2372.381061076237         12.68836370519020    
        1.18180000     2381.516284344209         13.78169667616986    
        1.18560000     2386.255885144578         13.39657478057323    
        1.18940000     2389.404406527860         12.99039785522436    
        1.19320000     2407.387611468994         12.98104272887977    
        1.19700000     2410.050972673877         14.28269466492563    
        1.20080000     2414.159247446163         11.79761834758392    
        1.20460000     2428.072634239988         13.40975485825047    
        1.20840000     2435.077712570616         13.63690224694875    
        1.21220000     2434.725872455587         13.85550200443216    
        1.21600000     2440.547964119424         13.97370339337984    
        1.21980000     2437.604291189974         14.55876056566350    
        1.22360000     2441.720748481830         12.10665118700037    
        1.22740000     2439.135887265447         13.80278152781428    
        1.23120000     2452.182308510156         13.26185734714133    
        1.23500000     2451.851051383719         13.55811579611796    
        1.23880000     2464.494518774594         14.00730044213421    
        1.24260000     2457.620042601337         14.00397249740488    
        1.24640000     2464.721017000678         12.95779610555359    
        1.25020000     2459.209142713320         13.22636727726496    
        1.25400000     2470.552167433905         12.72226372853324    
        1.25780000     2470.195215882346         13.47666003427915    
        1.26160000     2484.448843923911         13.69943064193306    
        1.26540000     2484.076456255351         14.00497257515715    
        1.26920000     2496.540953650228         14.22288966588366    
        1.27300000     2503.254209352968         13.89617339331960    
        1.27680000     2502.243985775005         14.17104937593929    
        1.28060000     2498.715187351507         14.05989380301433    
        1.28440000     2503.991847644378         14.14924193352105    
        1.28820000     2506.251034562771         14.96078981408585    
        1.29200000     2511.844227526176         13.02379869370245    
        1.29580000     2509.193413353496         13.58219643910181    
        1.29960000     2518.319175932827         13.44723998439820    
        1.30340000     2518.760386872869         13.47405591418825    
        1.30720000     2520.784689586242         12.62624034170107    
        1.31100000     2517.986751711251         13.46065968622085    
        1.31480000     2517.227467642201         12.33219155571484    
        1.31860000     2520.213382620571         12.14397130181571    
        1.32240000     2524.710914141656         12.42815128697856    
        1.32620000     2527.353779038262         12.86337422294304    
        1.33000000     2525.700743771119         13.28753788695465    
        1.33380000     2529.905271872337         13.27864889329300    
        1.33760000     2535.303594628789         12.82286993815465    
        1.34140000     2526.213128017014         12.66828081948109    
        1.34520000     2523.588382599854         12.02471478599993    
        1.34900000     2530.752026501021         12.96121536062275    
        1.35280000     2534.107516773036         13.68377867673436    
        1.35660000     2526.943981743061         12.65601804299571    
        1.36040000     2534.028104471325         13.09689779202294    
        1.36420000     2534.165131751311         12.75276462869457    
        1.36800000     2523.873139120608         11.57533836514707    
        1.37180000     2519.978280462135         12.40011358387129    
        1.37560000     2523.256449467698         12.29715261481260    
        1.37940000     2521.032923798385         12.04907556980002    
        1.38320000     2521.399609790446         12.51933698061825    
        1.38700000     2518.899701188131         11.08170573060000    
        1.39080000     2516.663543575220         10.99466302492426    
        1.39460000     2513.224493063250         11.76821815528059    
        1.39840000     2511.195841368811         11.30844660401146    
        1.40220000     2518.563895954880         11.36859537525771    
        1.40600000     2516.730950222556         11.24181019157959    
        1.40980000     2507.866652924513         10.58211400507745    
        1.41360000     2510.773483803134         10.36936759133539    
        1.41740000     2512.592532917847         10.34782796136128    
        1.42120000     2503.779593866613         11.45190427164497    
        1.42500000     2505.922610498028         12.46717257570952    
        1.42880000     2500.978600775889         10.32577934514606    
        1.43260000     2505.303891901473         11.39764604392630    
        1.43640000     2490.097361806049         10.86287008016531    
        1.44020000     2486.779366822212         10.26227923413950    
        1.44400000     2490.912905120578         10.32559114432289    
        1.44780000     2488.599254211081         10.31885853203098    
        1.45160000     2483.355049930164         10.29715353627065    
        1.45540000     2485.296408518227         11.41675443263080    
        1.45920000     2476.891705554497         11.66171694426817    
        1.46300000     2480.499023335113         10.28030423381115    
        1.46680000     2475.285219085085         10.18578654294601    
        1.47060000     2479.513635174371         10.25452281328603    
        1.47440000     2475.209630957128         10.24946764710353    
        1.47820000     2473.227019960041         10.16599622663141    
        1.48200000     2469.187874893026         10.22417135347311    
        1.48580000     2469.024683704768         10.15710504593935    
        1.48960000     2468.930429705678         10.19314567147301    
        1.49340000     2468.199320682556         10.23707107985146    
        1.49720000     2462.408757251524         10.16378269322255    
        1.50100000     2472.162402154789         10.23099862097778    
        1.50480000     2466.559874288533         10.22420847865888    
        1.50860000     2456.047626679795         10.07324491582102    
        1.51240000     2452.889521327187         10.15294720848454    
        1.51620000     2460.132849890351         10.18213173275253    
        1.52000000     2458.886567443233         10.15570942699439    
        1.52380000     2460.722069186072         10.20518990410058    
        1.52760000     2449.710322924061         10.24926340859952    
        1.53140000     2458.952724026883         10.12298932292316    
        1.53520000     2447.880058156217         10.13248883760993    
        1.53900000     2442.631168583527         10.19834157322852    
        1.54280000     2448.023390601913         10.11144003355682    
        1.54660000     2448.300910506468         10.20542845695762    
        1.55040000     2446.170551019993         10.25839910205268    
        1.55420000     2452.979948064606         10.10573199524010    
        1.55800000     2434.069177795150         10.07695777569086    
        1.56180000     2445.482675353519         10.13340831896610    
        1.56560000     2443.588487329321         10.14756019200984    
        1.56940000     2443.706431895856         10.02812353717305    
        1.57320000     2443.155533374170         10.13151074707503    
        1.57700000     2448.013542411582         10.16674633111058    
        1.58080000     2432.928470474981         10.18174785010454    
        1.58460000     2433.921446663668         10.10423941520148    
        1.58840000     2424.972112105655         10.07617218723301    
        1.59220000     2431.331527601800         10.07234908584776    
        1.59600000     2434.682965702248         10.12012903816681    
        1.59980000     2435.515914034204         10.08046047006923    
        1.60360000     2429.584494749177         10.03731669418683    
        1.60740000     2433.790278698683         10.14444259453980    
        1.61120000     2423.707211663347         10.10375201957202    
        1.61500000     2434.147820992193         10.06557266887681    
        1.61880000     2428.104254888404         10.16649235404582    
        1.62260000     2427.394017734532         10.00285070989894    
        1.62640000     2422.931814327050         9.999538672476572    
        1.63020000     2421.224104848323         10.06862498373828    
        1.63400000     2425.898630290180         10.16918997928929    
        1.63780000     2415.559399021234         10.02113480433424    
        1.64160000     2415.449524647508         10.08331562444761    
        1.64540000     2420.677765954897         10.05454030312324    
        1.64920000     2420.528148331729         10.07197859424770    
        1.65300000     2419.229540639889         10.04574287164669    
        1.65680000     2411.804628717715         9.998488055363323    
        1.66060000     2411.561788940800         9.966047665997346    
        1.66440000     2416.240346073621         9.978331497999417    
        1.66820000     2414.107827093962         10.08455990858945    
        1.67200000     2406.098627441223         10.02096119854830    
        1.67580000     2413.740373748477         10.04531514086255    
        1.67960000     2411.846960771923         9.987840283491483    
        1.68340000     2409.913203510339         10.02244946299970    
        1.68720000     2410.965559228803         9.974276040296225    
        1.69100000     2415.307850952055         10.00862121573609    
        1.69480000     2406.757720902832         9.893319116382241    
        1.69860000     2405.970268216135         9.948872281488065    
        1.70240000     2407.021454974554         9.984431091313020    
        1.70620000     2412.617669895353         10.01165964168292    
        1.71000000     2408.483825241496         9.939970917934554    
        1.71380000     2407.886268919225         9.967526895175896    
        1.71760000     2400.298846361000         9.892652334785152    
        1.72140000     2397.469250001902         9.944748631131787    
        1.72520000     2398.968976721399         10.01414567306308    
        1.72900000     2404.748054106949         9.976645051143732    
        1.73280000     2397.397561626905         9.948985457738488    
        1.73660000     2402.676137169605         9.920984004207076    
        1.74040000     2410.666739665326         9.981436463495129    
        1.74420000     2408.497302840171         10.02260725582283    
        1.74800000     2408.276576530572         9.992776763422512    
        1.75180000     2398.170357976249         9.979202869083046    
        1.75560000     2398.506404803246         9.916461800935782    
        1.75940000     2397.481823899841         9.958378184800809    
        1.76320000     2399.987897038750         9.952460093134679    
        1.76700000     2405.042118355749         9.924275739634419    
        1.77080000     2403.135719102336         9.989425000243497    
        1.77460000     2402.927384166620         9.957305485188055    
        1.77840000     2406.508906705063         9.963192705679285    
        1.78220000     2404.378359793775         9.944271314090987    
        1.78600000     2404.107601910589         9.902415679725557    
        1.78980000     2399.352181749494         9.918457785348737    
        1.79360000     2396.215059008324         9.924749534484272    
        1.79740000     2394.937833234660         9.922963256164174    
        1.80120000     2394.741816676736         9.952198217617745    
        1.80500000     2396.983258223116         9.984187651373709    
        1.80880000     2396.943630519025         9.846135122227917    
        1.81260000     2392.915912523017         9.901973019912774    
        1.81640000     2392.651766331309         9.922040752092343    
        1.82020000     2391.254578513118         9.907575816814443    
        1.82400000     2389.698287190885         9.945183044432731    
        1.82780000     2388.659117279132         9.928124182440266    
        1.83160000     2394.178646371039         9.849700897069237    
        1.83540000     2400.349513554443         9.916885548967796    
        1.83920000     2400.083012405586         9.995162531141814    
        1.84300000     2389.495060488751         9.890888902464214    
        1.84680000     2396.461243086480         9.967032446547478    
        1.85060000     2398.004934669324         10.04357221255617    
        1.85440000     2400.701844857083         9.938041469321066    
        1.85820000     2396.989495453799         9.936261592449721    
        1.86200000     2396.244345995137         9.898930890572803    
        1.86580000     2383.362826456565         9.923208268212766    
        1.86960000     2386.229261820463         9.794415608570938    
        1.87340000     2391.724845055509         9.944472358466632    
        1.87720000     2403.565987784169         10.02310336910121    
        1.88100000     2393.632521806773         10.00245719732456    
        1.88480000     2393.009967777046         9.944526552935088    
        1.88860000     2385.481622651621         9.970568746917639    
        1.89240000     2387.379109041841         9.923236936220425    
        1.89620000     2393.989222140900         9.965331170569538    
        1.90000000     2398.120632623742         9.945152879107463    
        1.90380000     2389.934109861883         9.922534577512522    
        1.90760000     2395.493855170214         10.00932416306429    
        1.91140000     2393.402169708403         9.926189101234925    
        1.91520000     2391.852324315094         9.903309566645348    
        1.91900000     2394.223598834357         9.965796730641440    
        1.92280000     2393.907607921428         9.867745325185416    
        1.92660000     2387.241335841785         9.880905322100679    
        1.93040000     2390.194945411224         9.949503377401365    
        1.93420000     2394.466101200218         9.987481735432757    
        1.93800000     2394.180872961550         9.895250166566207    
        1.94180000     2387.348399464647         9.976112686578535    
        1.94560000     2393.421607782381         9.947646928116066    
        1.94940000     2393.295620196912         9.940916388424286    
        1.95320000     2393.308244942052         9.983695570290131    
        1.95700000     2391.257393503966         9.954710731488223    
        1.96080000     2388.983769649728         9.854221912610564    
        1.96460000     2395.731425001526         9.906423814652948    
        1.96840000     2400.189105091295         10.02543789594062    
        1.97220000     2378.361389268583         9.899703552992996    
        1.97600000     2386.695198502838         9.951165361780596    
        1.97980000     2392.123546608744         9.944369181127174    
        1.98360000     2393.340691240279         9.962097666893852    
        1.98740000     2396.593032028722         9.960376816831520    
        1.99120000     2388.097627401927         9.883476931468673    
        1.99500000     2395.341310184567         9.816856200277183    
        1.99880000     2395.883760071265         9.881097653012182    
        2.00260000     2389.578309093285         9.984119066498591    
        2.00640000     2396.561887999994         9.942102846552295    
        2.01020000     2396.651339335353         9.934302033846038    
        2.01400000     2398.231856786145         9.863780444275752    
        2.01780000     2403.394939462985         9.921140839725071    
        2.02160000     2395.305152511205         9.951850284254704    
        2.02540000     2393.990146050570         9.961354549525032    
        2.02920000     2398.351346415672         9.952960768987618    
        2.03300000     2402.296327147015         9.916286224973497    
        2.03680000     2404.487714522912         9.963258684707267    
        2.04060000     2392.663656853006         9.954503167638045    
        2.04440000     2404.256098820550         10.01501936606021    
        2.04820000     2411.084397690325         10.02464515322607    
        2.05200000     2408.976049549762         10.00056340013261    
        2.05580000     2410.321565593138         9.937691984327826    
        2.05960000     2403.421471562049         9.956504353120870    
        2.06340000     2403.224810157926         9.930123537743720    
        2.06720000     2401.590348800413         9.920527795056771    
        2.07100000     2407.705901158418         9.957568333321079    
        2.07480000     2409.547855673704         10.00167546254916    
        2.07860000     2406.116057105486         9.983460064403918    
        2.08240000     2408.411293526937         9.988256544676247    
        2.08620000     2406.500519398536         9.968925980155223    
        2.09000000     2407.944139348625         10.00962269572642    
        2.09380000     2405.345016653898         9.978350902558921    
        2.09760000     2407.248483582950         9.938771579190009    
        2.10140000     2414.657607312253         9.984037117414980    
        2.10520000     2415.825779882409         10.00220460659764    
        2.10900000     2422.175360530200         9.986302357987411    
        2.11280000     2418.400225398815         10.02524178596383    
        2.11660000     2417.815344006548         9.994547624409892    
        2.12040000     2417.419624484919         10.00401563496649    
        2.12420000     2421.048363123216         10.04095738674222    
        2.12800000     2419.857901330742         10.07448464800105    
        2.13180000     2420.312445704882         9.970483419362214    
        2.13560000     2423.068085880700         9.958589870262449    
        2.13940000     2420.955635974794         10.03854398350727    
        2.14320000     2419.977162030609         10.01751158126285    
        2.14700000     2428.883410126875         10.11832701505109    
        2.15080000     2422.487435697847         10.09495632277085    
        2.15460000     2432.541197650943         10.11903687256706    
        2.15840000     2428.341727645379         10.05864552888907    
        2.16220000     2431.885762201155         10.03470336902929    
        2.16600000     2432.864285503950         10.08061863485298    
        2.16980000     2437.033864454181         9.993015908080819    
        2.17360000     2433.276033599435         10.07209919726437    
        2.17740000     2439.964322728142         10.12579163081022    
        2.18120000     2435.851340610152         10.12715531172031    
        2.18500000     2442.440456296890         10.11694688496832    
        2.18880000     2443.061063829533         10.16599164564479    
        2.19260000     2444.233777196508         10.14917971278509    
        2.19640000     2448.423103987224         10.11694838050044    
        2.20020000     2453.768501180770         10.08533656579817    
        2.20400000     2444.597553483918         10.09920135311430    
        2.20780000     2455.225398841553         10.21431462204868    
        2.21160000     2463.306896745392         10.17564476075087    
        2.21540000     2461.198469194184         10.16637533192543    
        2.21920000     2459.833160422439         10.22057518014769    
        2.22300000     2473.464768991841         10.16034614158623    
        2.22680000     2469.768331985237         10.19087968056645    
        2.23060000     2473.331879032538         10.25405858395966    
        2.23440000     2479.664533247896         10.23706821100734    
        2.23820000     2488.464168512414         10.19655966916176    
        2.24200000     2497.776059278621         10.36560936563857    
        2.24580000     2501.532458988812         10.29323250557460    
        2.24960000     2503.393191696372         10.29877399188818    
        2.25340000     2511.813929662655         10.40475570276710    
        2.25720000     2514.526471049721         10.38263841733255    
        2.26100000     2523.327775779225         10.39364124877429    
        2.26480000     2524.227302211284         10.37597514844029    
        2.26860000     2537.141364480191         10.52768190511769    
        2.27240000     2539.026733207614         10.51599516683425    
        2.27620000     2559.478631834819         10.55542412795246    
        2.28000000     2556.538127527836         10.52158748868606    
        2.28380000     2577.188415321659         10.61955696319820    
        2.28760000     2593.041602630400         10.67890912674026    
        2.29140000     2607.584792536663         10.66096050717677    
        2.29520000     2621.162246195682         10.65844047777856    
        2.29900000     2639.799779459338         10.75244595249331    
        2.30280000     2657.564343054610         10.90808464930604    
        2.30660000     2687.057155532182         10.95121329454191    
        2.31040000     2708.185882439923         11.05951381488098    
        2.31420000     2741.292727422222         11.09421953330629    
        2.31800000     2766.600449580259         11.21548386219482    
        2.32180000     2803.986774073071         11.48312218844351    
        2.32560000     2849.374854609378         11.64873772657016    
        2.32940000     2889.662993138297         11.70263446888828    
        2.33320000     2935.205734355104         12.73495431983459    
        2.33700000     3022.967047405180         12.19863898969015    
        2.34080000     3077.171693112678         13.32089794932491    
        2.34460000     3198.167596834380         12.83204254038741    
        2.34840000     3293.499143825085         15.54348137737286    
        2.35220000     3440.951171275896         15.41413449711131    
        2.35600000     3581.789718385343         19.33853710066921    
        2.35980000     3780.439921809138         19.03386723689386    
        2.36360000     3958.862039329603         20.66907267703228    
        2.36740000     4212.517553520663         24.07068600716116    
        2.37120000     4451.490257885966         27.60107941665179    
        2.37500000     4748.345002653728         24.41466947945416    
        2.37880000     5002.162163891191         31.01306026689865    
        2.38260000     5335.788974002249         29.02584288585744    
        2.38640000     5662.242854312585         36.11372358592277    
        2.39020000     6057.365610805522         35.64472463606921    
        2.39400000     6469.333526504543         42.95678550928189    
        2.39780000     6952.380073216676         41.67607475595015    
        2.40160000     7423.895854935286         49.63236424826897    
        2.40540000     7949.129532626267         45.59774032696802    
        2.40920000     8409.013869977651         47.15576421353781    
        2.41300000     8792.352810477973         38.29691479603851    
        2.41680000     8993.855437680893         33.36277867997568    
        2.42060000     8992.371206658563         33.66180374156915    
        2.42440000     8809.549237920635         42.41110843182288    
        2.42820000     8399.932655934283         51.38720389040670    
        2.43200000     7821.136761233694         55.28926204578624    
        2.43580000     7153.178161645533         54.39753488900987    
        2.43960000     6444.061289909967         55.06040742977248    
        2.44340000     5725.760770697148         48.24638829098045    
        2.44720000     5071.662228237207         45.08690318360016    
        2.45100000     4520.784498363674         37.02125505481566    
        2.45480000     4071.109367285586         33.00039144947627    
        2.45860000     3726.451280381867         26.02440859337556    
        2.46240000     3478.300411440241         21.87451119475964    
        2.46620000     3285.749511043873         19.45838740893177    
        2.47000000     3120.995422741917         18.65634200396360    
        2.47380000     2951.570654464600         16.75256363710270    
        2.47760000     2843.516776701262         12.60613846256833    
        2.48140000     2772.216243461807         11.33345761733755    
        2.48520000     2738.974165855136         11.16064372393024    
        2.48900000     2697.677855464935         11.00949150046587    
        2.49280000     2669.233761724078         10.94459203461281    
        2.49660000     2656.654554280065         10.80961399084227    
        2.50040000     2637.303736239556         10.72760540688301    
        2.50420000     2570.018464676623         10.59867857374400    
        2.50800000     2542.598256310979         10.49698566988574    
        2.51180000     2511.939174999888         10.26324988887850    
        2.51560000     2499.244438368549         10.27893840583689    
        2.51940000     2486.853497736469         10.31516529323593    
        2.52320000     2480.676672212931         10.17368888227359    
        2.52700000     2464.894423026937         10.16600737196896    
        2.53080000     2452.850430222200         10.16164792321081    
        2.53460000     2438.244733012795         10.01827198592846    
        2.53840000     2437.657250253641         10.01761304745113    
        2.54220000     2429.671433198121         10.12326567254217    
        2.54600000     2426.145303741176         10.04142622269130    
        2.54980000     2426.068128662594         10.00748640876956    
        2.55360000     2418.449986396497         10.05233576895227    
        2.55740000     2404.665090637683         9.963902069961190    
        2.56120000     2401.085983034502         9.926416830641900    
        2.56500000     2387.957288640636         9.883972526694558    
        2.56880000     2393.530866125132         9.958712019517730    
        2.57260000     2392.785789116310         9.959272627652377    
        2.57640000     2386.385488420638         9.915179077079655    
        2.58020000     2386.275899132065         9.879028683263217    
        2.58400000     2389.865396812416         9.904347461133566    
        2.58780000     2381.851856506623         9.919604215015555    
        2.59160000     2378.675351754412         9.838158003830287    
        2.59540000     2385.196750794077         9.806355052008696    
        2.59920000     2374.413773365291         9.768310369750996    
        2.60300000     2369.176227478085         9.839452990076643    
        2.60680000     2368.579911549484         9.760803141794259    
        2.61060000     2369.626906365228         9.807010059027469    
        2.61440000     2369.889338793475         9.766432932561401    
        2.61820000     2365.765528684694         9.818233998392065    
        2.62200000     2360.792252582979         9.816706399786456    
        2.62580000     2360.728835538671         9.806311282440719    
        2.62960000     2354.061131122754         9.747031086827770    
        2.63340000     2352.587535766751         9.727698285285127    
        2.63720000     2353.945713593704         9.781387106719706    
        2.64100000     2353.359567472924         9.781972387630688    
        2.64480000     2366.771825306171         9.786149432391754    
        2.64860000     2352.101703579420         9.758108751031841    
        2.65240000     2356.453606023849         9.734196928792402    
        2.65620000     2356.314736644533         9.735788970776833    
        2.66000000     2350.862914417010         9.682038582234078    
        2.66380000     2345.594538266049         9.713069002148458    
        2.66760000     2349.496096190438         9.705794752784163    
        2.67140000     2354.132409078932         9.764283597481226    
        2.67520000     2357.080615239874         9.783780666275922    
        2.67900000     2345.222555583624         9.706972210603313    
        2.68280000     2346.943269022247         9.751863589022784    
        2.68660000     2340.285768621629         9.735132574440035    
        2.69040000     2340.227119572610         9.711919064170022    
        2.69420000     2345.921891477137         9.767424109211992    
        2.69800000     2340.934331042649         9.703228632597220    
        2.70180000     2341.397743308623         9.728952513621534    
        2.70560000     2346.094499221265         9.778703578514113    
        2.70940000     2343.852698261662         9.774278296833138    
        2.71320000     2340.135184126651         9.740426854795759    
        2.71700000     2335.657400953650         9.648697701213480    
        2.72080000     2340.230726592783         9.665708879991426    
        2.72460000     2342.838055091367         9.687939145774088    
        2.72840000     2340.943197065801         9.678344254110396    
        2.73220000     2342.877481266582         9.659731465405885    
        2.73600000     2344.093676698419         9.690481372059455    
        2.73980000     2343.926110873472         9.683279383105345    
        2.74360000     2341.837943367373         9.810790169428333    
        2.74740000     2344.371606883006         9.668107114305386    
        2.75120000     2345.263488553564         9.693732498193080    
        2.75500000     2342.242693994081         9.818862785050159    
        2.75880000     2343.639517183258         9.672739821015663    
        2.76260000     2330.851742464537         9.675242240708023    
        2.76640000     2339.449864367532         9.699082039607244    
        2.77020000     2335.978509832632         9.597606958718236    
        2.77400000     2343.455094272319         9.721381459379309    
        2.77780000     2345.430027223283         9.701781243678333    
        2.78160000     2342.047262380779         9.696386586191418    
        2.78540000     2334.372354789632         9.686731242525445    
        2.78920000     2334.814915308549         9.772446234336673    
        2.79300000     2336.402331272006         9.687947747275565    
        2.79680000     2335.289302202586         9.660521156534156    
        2.80060000     2327.562864635492         9.604350963092072    
        2.80440000     2332.283027001714         9.732606696593766    
        2.80820000     2337.801678568308         9.730312278312047    
        2.81200000     2338.280295404171         9.610139702096410    
        2.81580000     2338.901790018466         9.714820235189066    
        2.81960000     2344.936113985324         9.747299985259263    
        2.82340000     2335.007737276587         9.662034167860972    
        2.82720000     2333.088833796870         9.672395701843069    
        2.83100000     2334.301084408884         9.696517398259974    
        2.83480000     2333.099526946331         9.608456363439595    
        2.83860000     2337.216616842256         9.660711410308654    
        2.84240000     2332.812566683792         9.749845896249832    
        2.84620000     2329.990441010046         9.640892060277267    
        2.85000000     2330.184945044290         9.674136728149724    
        2.85380000     2334.220235333177         9.755072339498186    
        2.85760000     2327.829018422592         9.680873282232161    
        2.86140000     2332.914990002918         9.708704098527663    
        2.86520000     2330.401325467555         9.659403117533071    
        2.86900000     2334.403774671258         9.714828217613634    
        2.87280000     2328.939679709912         9.718064308112371    
        2.87660000     2329.837757784269         9.689683761360113    
        2.88040000     2335.091612830756         9.723507073661334    
        2.88420000     2330.266885288348         9.717214065456186    
        2.88800000     2341.361765684226         9.776961849873599    
        2.89180000     2331.176533699359         9.675374866241945    
        2.89560000     2329.698578186830         9.658362480979894    
        2.89940000     2332.414828318741         9.629723456562505    
        2.90320000     2332.983188584661         9.660971171285141    
        2.90700000     2334.985286470499         9.638643414616187    
        2.91080000     2329.643430085592         9.686220680629184    
        2.91460000     2329.799779008451         9.635466848806139    
        2.91840000     2327.498110448197         9.669584590354511    
        2.92220000     2333.273453649088         9.730946408884877    
        2.92600000     2322.566457634622         9.696515974911136    
        2.92980000     2331.203044603600         9.696443797161397    
        2.93360000     2326.684932941720         9.641317332553434    
        2.93740000     2331.836080554629         9.698914954780811    
        2.94120000     2326.490968348492         9.674912901391140    
        2.94500000     2325.724174007055         9.653333796834987    
        2.94880000     2331.190709669960         9.702019315522657    
        2.95260000     2326.714284907102         9.570266671624724    
        2.95640000     2324.778797553289         9.637783946575384    
        2.96020000     2321.971241162937         9.597011121451102    
        2.96400000     2325.487009332675         9.644341666571490    
        2.96780000     2330.690970733949         9.601220337464817    
        2.97160000     2331.840547164874         9.693468420159583    
        2.97540000     2335.908168285319         9.712662990854415    
        2.97920000     2326.346524093350         9.639422795163894    
        2.98300000     2331.663050561129         9.716661606669776    
        2.98680000     2323.633558104779         9.683384463916223    
        2.99060000     2328.289210465799         9.696918849238358    
        2.99440000     2321.466527259302         9.673178242512318    
        2.99820000     2331.502442819689         9.695188046000867    
        3.00200000     2321.472876955498         9.644217511811007    
        3.00580000     2324.866696977402         9.663504718842891    
        3.00960000     2326.910331243985         9.682382558557865    
        3.01340000     2327.369167863325         9.726735417995359    
        3.01720000     2326.631298938340         9.655723742545751    
        3.02100000     2327.607079745560         9.588703774643195    
        3.02480000     2324.386150677996         9.563272832365984    
        3.02860000     2327.095960884736         9.668991378321016    
        3.03240000     2319.045814252437         9.606083931072453    
        3.03620000     2326.299703512268         9.632761488187359    
        3.04000000     2324.514040774155         9.633857026732532    
        3.04380000     2328.743960908275         9.698577427128869    
        3.04760000     2324.643408710554         9.610465786165433    
        3.05140000     2327.524586564166         9.673706012194677    
        3.05520000     2325.546053132166         9.740677314721351    
        3.05900000     2332.031498481854         9.618256463855216    
        3.06280000     2320.945353198817         9.683623514801925    
        3.06660000     2323.710858838147         9.620444348908880    
        3.07040000     2320.019743522836         9.544101379590142    
        3.07420000     2327.122561934879         9.666200387877343    
        3.07800000     2321.175821903847         9.646944496941336    
        3.08180000     2316.767954858318         9.637153613172465    
        3.08560000     2324.867308010630         9.664682936051582    
        3.08940000     2322.031552492669         9.704530164737299    
        3.09320000     2318.458298870671         9.592383216802641    
        3.09700000     2333.247589451953         9.640828458502016    
        3.10080000     2314.311476031351         9.561659597960123    
        3.10460000     2325.029482222967         9.712557611093503    
        3.10840000     2330.702496825679         9.663094849955206    
        3.11220000     2325.865719725544         9.586198905365775    
        3.11600000     2326.622428808118         9.728681583663320    
        3.11980000     2332.063081587945         9.731813976293074    
        3.12360000     2325.627030016065         9.682620463044193    
        3.12740000     2323.461483969149         9.629985880555031    
        3.13120000     2320.161506527732         9.598870143350263    
        3.13500000     2324.910815658749         9.597242794250116    
        3.13880000     2316.711982886026         9.621631532186608    
        3.14260000     2325.739452947130         9.681193765614065    
        3.14640000     2322.790503026670         9.615452904034568    
        3.15020000     2318.798870548852         9.616979661726013    
        3.15400000     2316.049475559705         9.668345788567709    
        3.15780000     2329.548489129330         9.678821118826649    
        3.16160000     2329.343871777109         9.733344824915651    
        3.16540000     2318.850741246579         9.566657541512091    
        3.16920000     2320.820972485245         9.692551504972183    
        3.17300000     2317.778590826375         9.648291976124847    
        3.17680000     2315.465842543379         9.593048250857509    
        3.18060000     2321.770819528428         9.661545652084738    
        3.18440000     2320.524278043926         9.669350761823130    
        3.18820000     2319.850916746386         9.668294219684853    
        3.19200000     2323.516244556549         9.621971070520788    
        3.19580000     2314.954487495749         9.600587634028395    
        3.19960000     2323.232746274806         9.562971284888496    
        3.20340000     2316.499405192410         9.515026040774620    
        3.20720000     2331.954946767453         9.625481276954297    
        3.21100000     2329.512833147295         9.675511174079928    
        3.21480000     2322.728292798085         9.647531808972133    
        3.21860000     2314.724577370780         9.576073337330980    
        3.22240000     2318.771284814211         9.636973468469121    
        3.22620000     2314.834930478094         9.690367807903939    
        3.23000000     2319.597426317711         9.669561108854314    
        3.23380000     2324.216064829135         9.656933921558224    
        3.23760000     2315.203015312554         9.602150209386860    
        3.24140000     2311.880265752462         9.615302230186309    
        3.24520000     2317.996324098710         9.664050656976263    
        3.24900000     2316.764384281561         9.596225249823572    
        3.25280000     2324.092053969268         9.601187421333119    
        3.25660000     2319.651035631877         9.667835024586896    
        3.26040000     2313.551330422410         9.600416857469442    
        3.26420000     2319.846491697908         9.635363850685374    
        3.26800000     2329.377335158497         9.618060943990075    
        3.27180000     2320.937891913143         9.664833698618619    
        3.27560000     2318.966548772383         9.689156174228218    
        3.27940000     2320.456112626241         9.623877046298780    
        3.28320000     2320.809502618069         9.651382505573075    
        3.28700000     2317.526704607381         9.631969709618575    
        3.29080000     2325.598569065434         9.692653716558590    
        3.29460000     2320.442789992846         9.712958399657037    
        3.29840000     2322.192712399433         9.683443007485664    
        3.30220000     2319.191691871068         9.663470552104023    
        3.30600000     2323.144213669120         9.622171771552329    
        3.30980000     2314.290552271799         9.651776502864482    
        3.31360000     2310.858154307297         9.676171651379166    
        3.31740000     2318.137710758197         9.624762491109523    
        3.32120000     2317.471417887307         9.558329720610574    
        3.32500000     2317.021304390657         9.559379312612956    
        3.32880000     2322.735899508607         9.615052607055922    
        3.33260000     2314.745128501877         9.596709347879385    
        3.33640000     2319.297968666899         9.633266961709463    
        3.34020000     2316.541789021709         9.618623151041193    
        3.34400000     2318.748582531980         9.645294967729111    
        3.34780000     2316.560259150865         9.548791401011993    
        3.35160000     2320.801473393738         9.623389198448805    
        3.35540000     2319.818643772833         9.688122153804033    
        3.35920000     2316.591182046588         9.499944714350661    
        3.36300000     2309.659521860249         9.611279862752868    
        3.36680000     2314.206599309739         9.588503651680549    
        3.37060000     2308.295995184559         9.542569739977679    
        3.37440000     2318.255357712198         9.654207990118598    
        3.37820000     2319.115388146211         9.678153662656703    
        3.38200000     2323.555048872595         9.661752148482581    
        3.38580000     2304.860888145427         9.569520677339312    
        3.38960000     2315.790143711890         9.640029837605489    
        3.39340000     2316.463036058359         9.601122603264974    
        3.39720000     2317.759860063557         9.579167131577707    
        3.40100000     2310.882227580448         9.555043410042837    
        3.40480000     2326.231610740384         9.698620785660648    
        3.40860000     2311.475634018922         9.583047501160703    
        3.41240000     2310.885188661714         9.480480867914586    
        3.41620000     2313.479110393741         9.647056103282926    
        3.42000000     2310.079751424834         9.655983365402436    
        3.42380000     2310.413270981390         9.641512425895302    
        3.42760000     2321.452385444319         9.637496919906397    
        3.43140000     2315.922762086497         9.568984489894802    
        3.43520000     2316.610907251657         9.597551757389583    
        3.43900000     2316.882202939963         9.667620641397571    
        3.44280000     2328.308103079487         9.629401988905743    
        3.44660000     2319.209948386427         9.624690448747186    
        3.45040000     2312.051878185716         9.648624256054729    
        3.45420000     2310.274807492656         9.656639611277207    
        3.45800000     2309.905326954382         9.640860805556841    
        3.46180000     2312.596844346133         9.668797018486151    
        3.46560000     2311.343202150465         9.583557470297253    
        3.46940000     2317.428280106255         9.738198969770190    
        3.47320000     2317.871327231694         9.620559589126335    
        3.47700000     2318.329225382926         9.592668749430294    
        3.48080000     2313.708954659764         9.615864949794755    
        3.48460000     2311.354335273551         9.584456220891955    
        3.48840000     2315.387775279269         9.599834457758071    
        3.49220000     2319.783822610696         9.661991441535557    
        3.49600000     2314.584795507017         9.583738475563685    
        3.49980000     2319.871887523841         9.525221853447963    
        3.50360000     2311.830518851572         9.512339882826605    
        3.50740000     2309.531026730933         9.560354756968701    
        3.51120000     2323.866817134051         9.657575615445447    
        3.51500000     2324.611182864870         9.738352122247539    
        3.51880000     2316.164085402807         9.570255080365818    
        3.52260000     2312.791468544948         9.657475630632364    
        3.52640000     2316.574964524026         9.704420205971173    
        3.53020000     2313.288251361671         9.719924109194187    
        3.53400000     2317.415532044434         9.656776694853248    
        3.53780000     2320.067392823199         9.640721554343859    
        3.54160000     2310.525061071271         9.705610953115492    
        3.54540000     2306.467113729456         9.639208080480358    
        3.54920000     2310.748724799299         9.550088219443550    
        3.55300000     2309.068034028837         9.573507047026155    
        3.55680000     2312.146927702441         9.646513243962012    
        3.56060000     2313.053981991183         9.654702124833886    
        3.56440000     2317.642073857790         9.614894949875925    
        3.56820000     2314.251050299670         9.616511384771222    
        3.57200000     2316.890618946927         9.658653409430086    
        3.57580000     2313.137040593078         9.635201737292540    
        3.57960000     2317.219175901359         9.572037189417935    
        3.58340000     2318.323451032010         9.630726584409665    
        3.58720000     2314.497405847999         9.597373687536322    
        3.59100000     2314.153198334972         9.641618613662658    
        3.59480000     2309.462948802915         9.682376052731190    
        3.59860000     2303.556002045283         9.645466784079330    
        3.60240000     2312.688310682325         9.626077462384835    
        3.60620000     2311.869101415878         9.601443997610545    
        3.61000000     2311.514375903615         9.616637989160028    
        3.61380000     2320.312063117666         9.703570928192763    
        3.61760000     2320.466747124437         9.665011938287215    
        3.62140000     2316.967243760515         9.540666188542017    
        3.62520000     2308.185037609899         9.506907628679533    
        3.62900000     2317.761632928220         9.577752314943512    
        3.63280000     2314.617809895470         9.583061200016477    
        3.63660000     2315.161677396463         9.589625112306162    
        3.64040000     2316.126559815441         9.650252287390131    
        3.64420000     2312.252398630946         9.642233770176341    
        3.64800000     2309.949302408566         9.591720672230231    
        3.65180000     2317.486524475533         9.635480427692109    
        3.65560000     2310.547627546990         9.610009740551353    
        3.65940000     2312.719086094058         9.545247134634929    
        3.66320000     2309.672791431841         9.604436072492804    
        3.66700000     2315.124129694143         9.607296114916892    
        3.67080000     2308.437030578870         9.559619823844406    
        3.67460000     2309.962464600844         9.641154096974116    
        3.67840000     2309.088229108636         9.674745701174587    
        3.68220000     2312.136074979019         9.638295577308961    
        3.68600000     2307.825071281774         9.583251413123323    
        3.68980000     2312.522404914898         9.623920799761459    
        3.69360000     2309.308691633613         9.619039839094885    
        3.69740000     2311.535827483284         9.584505571296354    
        3.70120000     2303.911865014378         9.548538829183890    
        3.70500000     2310.287294682696         9.656201228040107    
        3.70880000     2317.161582081590         9.664981020279070    
        3.71260000     2314.469749418827         9.588394672355319    
        3.71640000     2307.199374190831         9.619121622141014    
        3.72020000     2313.822752004591         9.625749811369484    
        3.72400000     2314.389516713064         9.636828134756380    
        3.72780000     2313.868978635308         9.589444224407188    
        3.73160000     2303.834099849420         9.540336134851648    
        3.73540000     2299.517766866139         9.546095360517544    
        3.73920000     2301.331621431711         9.642064837109752    
        3.74300000     2312.362145920325         9.602016093755015    
        3.74680000     2306.979474851421         9.612482750150303    
        3.75060000     2305.611376608702         9.632075076411615    
        3.75440000     2308.160465020013         9.653464018658878    
        3.75820000     2306.669134843362         9.628544493211756    
        3.76200000     2309.835491464449         9.687345889147307    
        3.76580000     2310.244664588960         9.640874144756527    
        3.76960000     2311.691923151426         9.720903935332796    
        3.77340000     2306.261623415387         9.616803478665719    
        3.77720000     2308.043238854720         9.596226213377857    
        3.78100000     2310.601940112104         9.622618786388886    
        3.78480000     2304.336945037804         9.622754724087764    
        3.78860000     2306.986720717320         9.563282427542854    
        3.79240000     2312.688490398070         9.607019811288801    
        3.79620000     2306.757361013268         9.598114970878536    
        3.80000000     2308.603657799225         9.543747603662649    
        3.80380000     2310.762176773389         9.526425363573004    
        3.80760000     2305.717865689395         9.560359799612419    
        3.81140000     2315.266622760540         9.618762245474892    
        3.81520000     2305.556633051393         9.661739309043785    
        3.81900000     2304.269766384953         9.516597058178787    
        3.82280000     2312.601739631516         9.665497429099034    
        3.82660000     2308.987732229752         9.654770688944684    
        3.83040000     2307.738928673362         9.746999387637610    
        3.83420000     2306.015541413314         9.591298587521987    
        3.83800000     2308.097279571076         9.590835589235187    
        3.84180000     2305.563693208990         9.672717832492717    
        3.84560000     2311.736238874584         9.708993863831596    
        3.84940000     2309.050530129972         9.582650040352549    
        3.85320000     2307.399732408520         9.641759296408814    
        3.85700000     2308.293179381350         9.605730002862128    
        3.86080000     2303.568990269197         9.622933082385725    
        3.86460000     2315.256779328914         9.611556416449488    
        3.86840000     2313.465366561855         9.617968585706183    
        3.87220000     2308.077108388075         9.609200439954950    
        3.87600000     2308.502470912092         9.622180347124331    
        3.87980000     2307.514729110179         9.596897414459482    
        3.88360000     2304.485677007799         9.599278131381347    
        3.88740000     2311.035681052325         9.590701211423742    
        3.89120000     2302.344343783984         9.667793824120610    
        3.89500000     2315.470709358317         9.620640282600840    
        3.89880000     2315.352611644197         9.714690020034331    
        3.90260000     2311.623312182062         9.556078874428104    
        3.90640000     2308.159761273016         9.559495972363024    
        3.91020000     2317.351212257602         9.625056664130566    
        3.91400000     2317.422485863464         9.732247535645877    
        3.91780000     2309.002222415581         9.636108333599296    
        3.92160000     2301.071149460838         9.562448425909144    
        3.92540000     2305.964396037774         9.545707416343680    
        3.92920000     2309.608563914389         9.645351768277038    
        3.93300000     2312.538504507429         9.626438082489294    
        3.93680000     2305.137009639223         9.593630195165579    
        3.94060000     2311.084996036532         9.617316974598975    
        3.94440000     2313.798700914328         9.608096583150534    
        3.94820000     2308.813129510679         9.603452185311108    
        3.95200000     2312.191868216652         9.673394087775742    
        3.95580000     2312.855375538399         9.607463216890514    
        3.95960000     2320.201898668234         9.571020323931837    
        3.96340000     2307.563605430068         9.575285493707757    
        3.96720000     2311.207929581568         9.650672070971618    
        3.97100000     2317.486051185493         9.674016788847680    
        3.97480000     2314.326064509454         9.725894844296505    
        3.97860000     2308.453082611295         9.718361832705744    
        3.98240000     2306.697189388555         9.684755668991233    
        3.98620000     2307.507410436981         9.592324113888044    
        3.99000000     2317.589279216872         9.605565924928717    
        3.99380000     2301.714173284924         9.613285292376577    
        3.99760000     2308.318797498257         9.573669100012909    
        4.00140000     2308.496605804129         9.576631537992871    
        4.00520000     2311.361851267000         9.692100841097806    
        4.00900000     2310.936515838484         9.662797416122890    
        4.01280000     2314.235926940367         9.621278701256847    
        4.01660000     2313.070021759565         9.642402692560312    
        4.02040000     2313.676261692068         9.617430563080449    
        4.02420000     2312.589608071763         9.639755575838137    
        4.02800000     2316.130775354308         9.640732594920330    
        4.03180000     2317.398323288430         9.624145530406798    
        4.03560000     2312.930708053221         9.638947961880877    
        4.03940000     2321.803007044511         9.701428904925757    
        4.04320000     2323.671334969746         9.646132774268958    
        4.04700000     2319.682975953103         9.718767710425560    
        4.05080000     2315.647408480251         9.673373379494965    
        4.05460000     2318.301854980407         9.657394387165807    
        4.05840000     2316.950634723828         9.673337776105642    
        4.06220000     2320.719755409254         9.711723427945103    
        4.06600000     2321.301697436107         9.694314409658169    
        4.06980000     2321.461546627305         9.770475574634954    
        4.07360000     2322.816135361053         9.666792089683490    
        4.07740000     2331.870137548689         9.731874601629487    
        4.08120000     2342.700412494964         9.741586623213093    
        4.08500000     2339.134452117112         9.728911672156730    
        4.08880000     2344.880807890605         9.712373880327938    
        4.09260000     2338.659634149466         9.699576519187188    
        4.09640000     2329.099211257077         9.626673832286906    
        4.10020000     2343.864251051791         9.696092909984221    
        4.10400000     2347.336999018939         9.746347457872574    
        4.10780000     2351.038858942030         9.747758370161643    
        4.11160000     2342.086372700193         9.721603283958212    
        4.11540000     2341.703822867096         9.760737965451975    
        4.11920000     2360.267983866189         9.702223686110813    
        4.12300000     2353.532534719744         9.760633499592124    
        4.12680000     2368.301071825646         9.741137480844106    
        4.13060000     2368.913193961246         9.953982215063052    
        4.13440000     2374.026976604733         9.879260721505270    
        4.13820000     2379.388116201841         9.871717168923499    
        4.14200000     2380.105920309314         9.937033796633854    
        4.14580000     2386.761531311754         9.987894856061216    
        4.14960000     2401.857855033120         9.929093807025419    
        4.15340000     2402.661848164712         10.02924375951040    
        4.15720000     2422.910771729536         10.03383373068564    
        4.16100000     2427.428915271619         10.07983178199513    
        4.16480000     2452.289676476025         10.13011208363530    
        4.16860000     2460.031978301240         10.13971654356685    
        4.17240000     2485.747035980392         10.17152811164623    
        4.17620000     2508.301737163884         10.30945969125105    
        4.18000000     2539.765448699576         10.47337399363989    
        4.18380000     2576.174085148031         10.58210178822087    
        4.18760000     2638.760147902384         10.78919769118108    
        4.19140000     2696.014692487436         11.79298977084429    
        4.19520000     2800.501394394351         13.23573109315910    
        4.19900000     2922.275726208193         16.08143800774230    
        4.20280000     3096.676365572076         17.10959708427155    
        4.20660000     3294.158223872390         22.54187581705894    
        4.21040000     3602.573807808312         23.15777824903973    
        4.21420000     3896.166526187948         26.35206099692156    
        4.21800000     4251.426009016760         25.34003405640525    
        4.22180000     4578.073862694451         27.96282711685728    
        4.22560000     4875.241774489644         23.99738095937645    
        4.22940000     5068.977426802344         19.61205189388409    
        4.23320000     5134.091085287317         19.80594003044517    
        4.23700000     5096.891039756366         19.58853800002130    
        4.24080000     4940.487871454374         24.58415336410980    
        4.24460000     4681.403255695287         29.64956942071625    
        4.24840000     4363.465163380188         28.93299016402467    
        4.25220000     4033.584110131122         29.06302205276366    
        4.25600000     3713.506808509267         26.19291142551035    
        4.25980000     3421.436875575630         23.75940330231255    
        4.26360000     3195.545871560539         20.40152728008366    
        4.26740000     3007.528676427859         17.60992389838102    
        4.27120000     2864.709964074555         16.39368301011444    
        4.27500000     2749.584623027917         12.88445886494625    
        4.27880000     2667.052215451629         11.79668187191797    
        4.28260000     2604.485916908540         10.69897660515180    
        4.28640000     2558.816499619015         10.48963758296037    
        4.29020000     2525.266332460925         10.38922930553589    
        4.29400000     2493.624668737424         10.30745414541323    
        4.29780000     2466.159056367862         10.14476247567101    
        4.30160000     2441.175344418531         10.04995748400875    
        4.30540000     2426.153532259923         10.12255784993461    
        4.30920000     2418.950502176249         10.07638345664408    
        4.31300000     2403.185152723379         9.954081696930409    
        4.31680000     2396.405203378810         9.936017341069038    
        4.32060000     2391.316045048704         9.877814309417854    
        4.32440000     2380.462844610137         9.853128002899702    
        4.32820000     2372.828749110005         9.883570011404899    
        4.33200000     2366.547182758260         9.852505233680040    
        4.33580000     2352.427836259244         9.868236074795481    
        4.33960000     2349.791258997030         9.829572030981232    
        4.34340000     2338.962077866207         9.712560422740950    
        4.34720000     2337.744204230097         9.768906274669671    
        4.35100000     2345.732484371382         9.806104438613042    
        4.35480000     2339.922931391898         9.737773250762963    
        4.35860000     2339.089765366249         9.749991378722008    
        4.36240000     2326.681481412937         9.747793126334146    
        4.36620000     2329.344809668065         9.796037836496767    
        4.37000000     2338.047328607744         9.810408413111690    
        4.37380000     2327.458650612660         9.724625490041801    
        4.37760000     2324.879979888918         9.733928464500506    
        4.38140000     2323.161530581613         9.712467771876579    
        4.38520000     2317.387645480962         9.704140163658494    
        4.38900000     2313.848058709837         9.573533213099514    
        4.39280000     2312.863713015474         9.595575581960283    
        4.39660000     2309.843392726968         9.618922676089667    
        4.40040000     2309.879603299270         9.603664818533092    
        4.40420000     2310.850326037463         9.612477775015382    
        4.40800000     2306.579014523411         9.590472900459197    
        4.41180000     2305.484775168431         9.623188380683464    
        4.41560000     2304.353176707210         9.661999945231136    
        4.41940000     2311.089966052980         9.543750725504120    
        4.42320000     2303.088734277675         9.618417230044997    
        4.42700000     2301.549668206664         9.558046158182641    
        4.43080000     2309.427793719763         9.721775806162613    
        4.43460000     2307.130461147636         9.640941991063986    
        4.43840000     2306.360501550019         9.647452921005563    
        4.44220000     2302.667407604416         9.658194950741031    
        4.44600000     2297.011681224330         9.643374395069532    
        4.44980000     2298.807660392253         9.564372274543395    
        4.45360000     2293.966015972703         9.645264275397675    
        4.45740000     2297.758048893618         9.602738196326822    
        4.46120000     2292.969267346406         9.619147447910496    
        4.46500000     2302.108144970307         9.587728312965629    
        4.46880000     2296.845558054500         9.541632148222238    
        4.47260000     2295.732500464681         9.457874074122588    
        4.47640000     2291.746328842815         9.503505905591009    
        4.48020000     2290.564373381862         9.584755002600009    
        4.48400000     2289.499277650072         9.567067207440656    
        4.48780000     2293.168592934041         9.576811675444825    
        4.49160000     2289.775801544472         9.566398572562052    
        4.49540000     2300.257706724119         9.536865145411861    
        4.49920000     2298.611767180437         9.530732559290666    
        4.50300000     2290.921770240952         9.536892532638685    
        4.50680000     2289.978084676106         9.545412093774623    
        4.51060000     2307.276702491313         9.552319447931056    
        4.51440000     2290.484274030691         9.596839153425259    
        4.51820000     2295.935490032232         9.586016071199253    
        4.52200000     2294.698553633308         9.611243053482475    
        4.52580000     2303.371013279874         9.656254333980774    
        4.52960000     2293.602976210685         9.552350700741902    
        4.53340000     2297.243700659315         9.582338391078157    
        4.53720000     2290.275043543156         9.594892153689067    
        4.54100000     2298.131087164498         9.599509441202491    
        4.54480000     2290.573893141781         9.532690708213783    
        4.54860000     2286.954066225839         9.496413057274067    
        4.55240000     2293.041157409575         9.572881910959602    
        4.55620000     2296.290201298263         9.554662531674914    
        4.56000000     2295.375709708390         9.596650568390615    
        4.56380000     2300.072718869280         9.504855497173923    
        4.56760000     2291.398222025982         9.525074476988717    
        4.57140000     2293.089439240342         9.594042379109133    
        4.57520000     2285.556764326936         9.504048606608132    
        4.57900000     2289.358494578471         9.566985628032826    
        4.58280000     2289.824511791503         9.530039427567896    
        4.58660000     2294.947599266155         9.536417071273309    
        4.59040000     2286.763900269390         9.536717619613373    
        4.59420000     2288.194317666865         9.534569408542948    
        4.59800000     2281.836030110101         9.518461993862033    
        4.60180000     2284.787207997751         9.495438993058892    
        4.60560000     2283.334057016230         9.584187591616713    
        4.60940000     2288.721716128814         9.604787318231784    
        4.61320000     2293.505054239923         9.602946676926905    
        4.61700000     2298.007426056146         9.523168666276300    
        4.62080000     2289.040745490304         9.442586172191859    
        4.62460000     2291.047814657014         9.517801923061832    
        4.62840000     2289.899779619838         9.535353825289080    
        4.63220000     2290.165420959680         9.591210730188207    
        4.63600000     2284.696270385723         9.626109070437103    
        4.63980000     2282.809082489808         9.526632892643560    
        4.64360000     2288.906956661169         9.586261014577001    
        4.64740000     2294.384854759565         9.635908706440347    
        4.65120000     2288.077650668167         9.587067445360274    
        4.65500000     2287.019392683899         9.537455258822108    
        4.65880000     2289.274690528892         9.555878652366195    
        4.66260000     2296.755965236093         9.635196886368949    
        4.66640000     2298.434941849726         9.703199553428965    
        4.67020000     2299.835977211927         9.626585387037006    
        4.67400000     2298.890200720679         9.608141960063930    
        4.67780000     2288.754407252563         9.623973054730047    
        4.68160000     2292.763177722193         9.613783402853104    
        4.68540000     2295.242521665591         9.633619463994560    
        4.68920000     2297.471239863237         9.510003282006876    
        4.69300000     2292.185347204607         9.483051256590327    
        4.69680000     2292.266563480816         9.564086826072121    
        4.70060000     2298.449047064021         9.612241996779410    
        4.70440000     2304.835530129667         9.628516291224638    
        4.70820000     2297.700697420928         9.537267174931053    
        4.71200000     2298.732130722688         9.555435583928869    
        4.71580000     2298.332886529334         9.577814711217881    
        4.71960000     2307.383706291621         9.569899797496292    
        4.72340000     2312.652489780806         9.600565913653416    
        4.72720000     2319.173185283256         9.561395680589007    
        4.73100000     2324.785299146274         9.733426692304802    
        4.73480000     2317.713361263160         9.636631824767361    
        4.73860000     2325.670019978183         9.694954832060997    
        4.74240000     2336.454673285616         9.722512849615748    
        4.74620000     2335.780235108640         9.766640577533050    
        4.75000000     2346.839890148870         9.728228271626936    
        4.75380000     2365.583351423988         9.866255041936043    
        4.75760000     2372.121921362893         9.829250256399536    
        4.76140000     2385.604668365608         9.989936114750261    
        4.76520000     2405.223219427742         9.947555967161717    
        4.76900000     2404.011458823641         9.907988297735626    
        4.77280000     2411.125179055167         9.858414085696491    
        4.77660000     2426.499983548576         9.999059134279074    
        4.78040000     2430.572136107997         10.13537786776638    
        4.78420000     2429.424624934554         10.05798833304839    
        4.78800000     2440.528451762971         10.09000195506399    
        4.79180000     2430.269760095262         10.03795613063042    
        4.79560000     2434.642387229581         10.02753962435183    
        4.79940000     2433.972847609636         10.03541024703355    
        4.80320000     2437.114828109639         10.07847536797925    
        4.80700000     2428.161532689522         10.04191913434737    
        4.81080000     2445.928304395787         9.996294879773133    
        4.81460000     2446.999522626371         10.15214771722346    
        4.81840000     2448.018404134191         10.12574194826933    
        4.82220000     2451.802874670589         10.15969072967875    
        4.82600000     2459.321931611393         10.25554012204576    
        4.82980000     2458.245306848136         10.17690370317612    
        4.83360000     2471.792783471689         10.23384742005702    
        4.83740000     2477.215920347247         10.30894245679492    
        4.84120000     2495.969773678931         10.32253525443456    
        4.84500000     2495.839551074264         10.23594041876743    
        4.84880000     2520.232500821287         10.29894066488593    
        4.85260000     2538.508995566408         10.44788683117287    
        4.85640000     2543.864619769851         10.43794984509801    
        4.86020000     2548.071345001279         10.46153679906389    
        4.86400000     2552.716967490514         10.33592860547544    
        4.86780000     2540.425216753841         10.41217344490404    
        4.87160000     2543.829371598256         10.50948148459546    
        4.87540000     2526.894579933859         10.35135805939318    
        4.87920000     2506.982146648400         10.29401814311891    
        4.88300000     2476.339327052484         10.20697760398283    
        4.88680000     2462.431436493090         10.16991588780771    
        4.89060000     2436.545818108586         10.09638506019712    
        4.89440000     2425.438347305957         10.02539876414014    
        4.89820000     2413.608018846233         10.00855094568732    
        4.90200000     2404.718449941771         9.956609666357659    
        4.90580000     2378.533147756185         9.884301414632924    
        4.90960000     2374.724574535680         9.842732245281880    
        4.91340000     2358.728013126769         9.784776641302974    
        4.91720000     2349.964910140829         9.707216535737233    
        4.92100000     2331.035025215417         9.608070572653867    
        4.92480000     2319.269131492562         9.679326123911691    
        4.92860000     2319.540825564733         9.675130199940314    
        4.93240000     2314.074721901424         9.639748055982645    
        4.93620000     2298.826181777515         9.646343060969917    
        4.94000000     2297.559065612137         9.529354937771418    
        4.94380000     2296.998846908915         9.580795261750922    
        4.94760000     2290.030293127413         9.601695091483936    
        4.95140000     2299.222999242479         9.660041130857641    
        4.95520000     2297.990386133165         9.558641851079249    
        4.95900000     2294.875253862471         9.525521708163403    
        4.96280000     2298.742602086851         9.582644361835706    
        4.96660000     2288.710556264907         9.620010988794135    
        4.97040000     2277.736322690207         9.474089415574111    
        4.97420000     2276.571934456223         9.481572161871036    
        4.97800000     2278.303697562621         9.564098268207754    
        4.98180000     2283.867832307892         9.541987275405594    
        4.98560000     2281.838479158036         9.494060208372774    
        4.98940000     2276.841378897251         9.405789451593492    
        4.99320000     2281.438324057426         9.477766871502235    
        4.99700000     2275.617313262916         9.469057790367076    
        5.00080000     2278.567487597509         9.496872931658791    
        5.00460000     2270.290894334438         9.506081040647484    
        5.00840000     2263.197190332446         9.419193873138880    
        5.01220000     2270.261107058967         9.499483391332868    
        5.01600000     2266.974655340789         9.489267974266427    
        5.01980000     2269.809500612845         9.495577703202216    
        5.02360000     2265.261933054276         9.464690923267067    
        5.02740000     2259.703960137512         9.397311354960852    
        5.03120000     2262.093234976130         9.447276860954176    
        5.03500000     2267.426095041538         9.435126378960536    
        5.03880000     2258.714302587072         9.442869182573768    
        5.04260000     2253.970574760875         9.377588439969749    
        5.04640000     2257.552798815742         9.325431080719222    
        5.05020000     2256.007767148292         9.949058267153355    
        5.05400000     2263.808479939850         10.91253180092771    
        5.05780000     2261.304382027984         10.97071874026012    
        5.06160000     2262.944198344477         11.04646126070534    
        5.06540000     2262.708899861802         10.89309625026995    
        5.06920000     2252.086381536560         10.83446170578698    
        5.07300000     2263.784615822206         10.76288599709825    
        5.07680000     2257.509820682613         10.83010671406632    
        5.08060000     2246.787469922529         10.91139781349797    
        5.08440000     2259.483238858806         10.92984576096931    
        5.08820000     2267.047429984661         10.94308772522603    
        5.09200000     2252.872226981415         10.79782822905543    
        5.09580000     2262.517269176667         10.94303165720225    
        5.09960000     2240.909356226322         10.79144069731927    
        5.10340000     2253.350666534847         10.93239406482855    
        5.10720000     2246.129401823326         10.86216837821698    
        5.11100000     2259.270696473717         10.78611279304982    
        5.11480000     2244.414357615241         10.82658101003021    
        5.11860000     2252.909492124712         10.89893654761721    
        5.12240000     2247.898457582095         10.85049866493854    
        5.12620000     2252.792907716842         10.96040998222811    
        5.13000000     2249.587986815291         10.82313042059436    
        5.13380000     2247.372969886489         10.83457366365399    
        5.13760000     2244.830671785337         10.94673763038223    
        5.14140000     2254.591804866723         10.96023831975157    
        5.14520000     2241.238319957630         10.75832055852317    
        5.14900000     2261.614772158099         10.83365126033237    
        5.15280000     2255.350042481638         10.83644870160016    
        5.15660000     2255.124418768379         10.86150157723996    
        5.16040000     2250.272762702843         10.86731595079545    
        5.16420000     2247.640088082992         10.69863789682366    
        5.16800000     2247.786606417935         10.76319105594884    
        5.17180000     2255.603699858027         10.88135117150761    
        5.17560000     2248.876006103763         10.72596225990060    
        5.17940000     2241.138804425032         10.73723069096347    
        5.18320000     2257.370208480847         10.82742860749243    
        5.18700000     2249.579008007451         10.84630849211192    
        5.19080000     2244.409887076075         10.88566546230287    
        5.19460000     2240.956839107683         10.78964004890620    
        5.19840000     2239.869473510204         10.82049546342159    
        5.20220000     2252.603259055638         10.84162667233874    
        5.20600000     2254.399226283952         10.89255364377930    
        5.20980000     2247.636667183784         10.82137361386497    
        5.21360000     2242.023827427781         10.76662857838508    
        5.21740000     2248.065633497946         10.78063855016036    
        5.22120000     2248.784770426209         10.76901802195937    
        5.22500000     2246.445020360713         10.85344643821351    
        5.22880000     2251.267930873866         10.87163307141041    
        5.23260000     2255.483254344223         10.83869326511533    
        5.23640000     2242.112479173372         10.82326921104608    
        5.24020000     2252.277242499285         9.858772998767524    
        5.24400000     2259.242011914228         9.397127117734913    
        5.24780000     2249.735053451223         9.342262492398474    
        5.25160000     2248.649989235574         9.431873685302836    
        5.25540000     2248.135241573384         9.376061152928393    
        5.25920000     2244.898825569288         9.333097118111771    
        5.26300000     2253.232873924122         9.411078604055131    
        5.26680000     2247.661372689729         9.475863098524664    
        5.27060000     2243.964236807295         9.352353727157737    
        5.27440000     2246.448650697739         9.350031640937416    
        5.27820000     2248.923000404466         9.401711041794808    
        5.28200000     2256.871055610409         9.386534951698263    
        5.28580000     2250.290745403065         9.333983322976660    
        5.28960000     2249.176546212675         9.270223699116444    
        5.29340000     2240.060760017737         9.355073877857398    
        5.29720000     2240.291503313846         9.367896876963449    
        5.30100000     2245.959397031931         9.358554223918977    
        5.30480000     2242.716857657912         9.341714662494720    
        5.30860000     2237.453648315902         9.336847808453911    
        5.31240000     2233.566199084882         9.366287180055389    
        5.31620000     2240.433518747271         9.408029048225655    
        5.32000000     2244.049606570929         9.387997538772845    
        5.32380000     2247.009852129191         9.417734201453579    
        5.32760000     2235.528253839650         9.370349724947985    
        5.33140000     2246.227722267553         9.387767692751849    
        5.33520000     2244.701033980311         9.346879094755630    
        5.33900000     2244.970481886690         9.373048191786809    
        5.34280000     2240.383825470366         9.355519028246299    
        5.34660000     2236.912815963560         9.237486265065582    
        5.35040000     2228.077913236990         9.565875042662679    
        5.35420000     2244.798930986500         10.87038243174495    
        5.35800000     2239.202815661401         10.93790038107554    
        5.36180000     2240.270252423553         10.86244697006171    
        5.36560000     2247.942475606108         10.81964456639670    
        5.36940000     2242.811168569372         10.77025012407674    
        5.37320000     2243.467381411795         10.75298201687674    
        5.37700000     2240.527271236827         10.79457890004122    
        5.38080000     2241.500927137245         10.88528670738963    
        5.38460000     2250.040459390486         10.83166403314619    
        5.38840000     2238.721337128245         10.80469177331130    
        5.39220000     2233.849304161258         10.79419480292148    
        5.39600000     2242.227146761669         10.86293694726877    
        5.39980000     2232.521777979480         10.78132293341393    
        5.40360000     2231.701294572012         10.82024718887723    
        5.40740000     2237.133166258639         10.77555149491950    
        5.41120000     2230.510727393724         10.67834103759313    
        5.41500000     2228.720264124740         10.80094682724221    
        5.41880000     2236.391352666213         10.81076170502461    
        5.42260000     2226.936941210002         10.68749992009125    
        5.42640000     2234.830505733563         10.91009804099536    
        5.43020000     2229.924482707891         10.73999072354597    
        5.43400000     2236.263484465446         10.66712674900170    
        5.43780000     2226.469981033667         10.89558745615126    
        5.44160000     2232.335669060212         11.28859261052778    
        5.44540000     2234.900177975142         10.72182994643854    
        5.44920000     2241.611420784571         10.87010361026288    
        5.45300000     2236.527115468080         10.78644084801228    
        5.45680000     2232.103305155018         10.78805967100388    
        5.46060000     2241.017956136252         10.73164791245617    
        5.46440000     2243.312613470509         10.70656231586346    
        5.46820000     2225.742576175347         10.78790521596097    
        5.47200000     2229.972096548179         10.84068278128653    
        5.47580000     2228.237653340221         10.68467631931459    
        5.47960000     2227.241571980560         10.68661789704224    
        5.48340000     2228.903698393046         10.70497575904701    
        5.48720000     2230.199562673161         10.82102533775197    
        5.49100000     2222.889813874476         10.78735597745501    
        5.49480000     2220.883348903701         10.76182975810341    
        5.49860000     2224.463205166439         10.78341987563516    
        5.50240000     2221.949084009574         10.71964918396207    
        5.50620000     2217.191187009604         10.64650858087169    
        5.51000000     2229.789778992193         10.73974802142571    
        5.51380000     2228.380179471404         10.77987120339592    
        5.51760000     2227.362519286458         10.71837006975695    
        5.52140000     2220.869964612780         10.62818044144826    
        5.52520000     2220.413993736023         10.69339960695656    
        5.52900000     2216.895203767980         10.69459008416027    
        5.53280000     2225.177628002217         10.63910752401968    
        5.53660000     2220.283192375328         10.67582882962074    
        5.54040000     2228.179114532261         10.01246477533185    
        5.54420000     2230.662239874714         9.284702766867694    
        5.54800000     2222.749836635366         9.268897971523344    
        5.55180000     2222.592020270543         9.341452289726353    
        5.55560000     2224.530574608402         9.291872053545365    
        5.55940000     2234.041094196739         9.289929700454101    
        5.56320000     2230.846503099914         9.330764870884412    
        5.56700000     2228.264196627983         9.336873293553159    
        5.57080000     2223.351061007560         9.281764121097270    
        5.57460000     2222.071555570492         9.305231509513812    
        5.57840000     2221.977060719218         9.290804746004017    
        5.58220000     2222.873611075248         9.248836056801922    
        5.58600000     2223.922142023919         9.264202994467789    
        5.58980000     2220.805398313531         9.229931949954015    
        5.59360000     2223.589440663788         9.309287091780705    
        5.59740000     2220.556169462523         9.278512559389126    
        5.60120000     2227.162369072644         9.286899437672794    
        5.60500000     2228.073987428370         9.312839787100465    
        5.60880000     2224.433445857509         9.280375726065817    
        5.61260000     2217.472696976144         9.245993530830674    
        5.61640000     2222.112476499863         9.336186409432237    
        5.62020000     2220.164460779503         9.300104857946881    
        5.62400000     2219.717547384301         9.277735260326992    
        5.62780000     2218.645178820346         9.260367976473439    
        5.63160000     2221.249546952224         9.300817164008780    
        5.63540000     2223.905524108768         9.271607724280640    
        5.63920000     2223.951333052268         9.267575861893569    
        5.64300000     2220.096567808286         9.273563064904538    
        5.64680000     2218.405573497177         9.185605532141359    
        5.65060000     2221.617441449186         9.729817229387445    
        5.65440000     2222.019955788123         10.72416073758529    
        5.65820000     2220.895983702373         10.77152538484227    
        5.66200000     2232.098763471740         10.76984556814567    
        5.66580000     2223.395978060229         10.74348431198930    
        5.66960000     2212.140833746304         10.66874315944626    
        5.67340000     2211.837754510140         10.71047405410608    
        5.67720000     2207.037179839806         10.67765460307490    
        5.68100000     2216.756498353802         10.73089171133121    
        5.68480000     2209.946527557699         10.64726007052419    
        5.68860000     2221.352599120646         10.69369592210117    
        5.69240000     2209.486868176106         10.72257061314618    
        5.69620000     2217.947129990598         10.77604016255758    
        5.70000000     2217.348960127373         10.82874375737972    
        5.70380000     2215.601919995091         10.76026785447252    
        5.70760000     2212.460577500793         10.67475999177444    
        5.71140000     2217.877903718912         10.65487032213206    
        5.71520000     2213.659808746344         10.76841527425255    
        5.71900000     2211.502312999136         10.74045784766469    
        5.72280000     2212.931233033998         10.59203029787327    
        5.72660000     2211.730005073275         10.75034986253328    
        5.73040000     2211.350438451803         10.63656417941318    
        5.73420000     2208.785950192617         10.56196404486367    
        5.73800000     2212.485498477794         10.70833812924823    
        5.74180000     2213.935123838831         10.70626225303754    
        5.74560000     2205.591874689441         10.60210891399589    
        5.74940000     2204.108927292914         10.65068864874200    
        5.75320000     2205.023276709260         10.64561700413409    
        5.75700000     2202.952112173510         10.67561599083455    
        5.76080000     2209.376954551651         10.63730406810832    
        5.76460000     2216.004877774785         10.65763840335450    
        5.76840000     2217.704029224925         10.79032425288741    
        5.77220000     2213.330413294001         10.77488489449065    
        5.77600000     2212.593838319527         10.67717966347312    
        5.77980000     2214.328083186514         10.64815277880890    
        5.78360000     2209.075159727319         10.58853205839755    
        5.78740000     2207.317107696791         10.70403012729485    
        5.79120000     2210.527472652083         10.74049807582074    
        5.79500000     2213.316500260888         10.78222541476429    
        5.79880000     2203.238194033513         10.68251266266450    
        5.80260000     2203.227315342101         10.69118088132368    
        5.80640000     2205.427308779965         10.56793291756369    
        5.81020000     2204.865885267639         10.61985992261162    
        5.81400000     2200.476924660742         10.66530447380254    
        5.81780000     2213.348029450496         10.71393333324062    
        5.82160000     2202.896139108316         10.68555866284645    
        5.82540000     2206.891446652047         10.64025208173886    
        5.82920000     2209.733984727857         10.68324246096419    
        5.83300000     2210.057303411312         10.51146054328257    
        5.83680000     2208.524882733339         10.59754234692779    
        5.84060000     2202.337225022182         9.719943028337475    
        5.84440000     2206.970531334671         9.174690689766944    
        5.84820000     2215.820666922836         9.209617845034471    
        5.85200000     2216.411150247285         9.257922402030749    
        5.85580000     2215.164625678171         9.238779752696667    
        5.85960000     2217.918249157213         9.208340286633419    
        5.86340000     2213.594150818876         9.178882265034430    
        5.86720000     2214.126744670082         9.214242076299795    
        5.87100000     2202.085631466941         9.192553080241440    
        5.87480000     2197.448294573580         9.189332466303641    
        5.87860000     2208.026857038536         9.214396089839383    
        5.88240000     2213.987803866398         9.234096449805753    
        5.88620000     2211.131918303074         9.294590010920833    
        5.89000000     2209.362149440447         9.265978396078490    
        5.89380000     2213.449720743275         9.288441268457465    
        5.89760000     2209.667025232711         9.256098790929686    
        5.90140000     2209.644459115799         9.242750153015368    
        5.90520000     2204.792426519156         9.198059865507414    
        5.90900000     2204.009713859733         9.206479436952018    
        5.91280000     2205.259018551225         9.194557344699296    
        5.91660000     2206.989167034043         9.249599998213222    
        5.92040000     2200.713347479526         9.455172757731289    
        5.92420000     2210.027689417878         9.274627603295592    
        5.92800000     2216.841429635199         9.290401198310708    
        5.93180000     2204.568007043682         9.246079824933576    
        5.93560000     2203.451540272864         9.201688087554608    
        5.93940000     2206.771866728842         9.239330553028744    
        5.94320000     2201.352973125441         9.192206018971920    
        5.94700000     2201.471662821200         9.083436412641124    
        5.95080000     2201.831168837921         9.749797471041646    
        5.95460000     2209.204480191141         10.70225713465715    
        5.95840000     2205.865838587746         10.63506161117281    
        5.96220000     2212.506903900738         10.65970841392290    
        5.96600000     2213.066108770405         10.70817809013467    
        5.96980000     2209.432943703387         10.63788358346141    
        5.97360000     2211.883613663892         10.77450331161612    
        5.97740000     2195.972936234511         10.64645530605849    
        5.98120000     2198.495058996954         10.64412580674089    
        5.98500000     2197.992459985438         10.58168881473541    
        5.98880000     2198.415768081033         10.69379818168625    
        5.99260000     2200.604300366998         10.68467326061121    
        5.99640000     2201.952305714184         10.67007850009234    
        6.00020000     2186.228363667154         10.60978329327234    
        6.00400000     2198.971310174844         10.71124848678532    
        6.00780000     2198.918425711745         10.68168257537571    
        6.01160000     2197.154472402415         10.62709516975718    
        6.01540000     2203.301378503556         10.67363604148144    
        6.01920000     2204.070535490980         10.79834947603643    
        6.02300000     2192.033000528743         10.61163156381008    
        6.02680000     2194.956128803723         10.68254031578465    
        6.03060000     2203.832338950283         10.58420414859239    
        6.03440000     2210.828912074191         10.60086101232911    
        6.03820000     2199.875927490144         10.54675753555925    
        6.04200000     2200.971882003607         10.65903749785975    
        6.04580000     2203.331758423874         10.71523526662603    
        6.04960000     2197.744836031888         10.62394615193387    
        6.05340000     2205.234615742466         10.62526060935841    
        6.05720000     2199.738037652010         10.66143640421270    
        6.06100000     2201.379402377761         10.63187675919286    
        6.06480000     2199.277713448644         10.73198502385981    
        6.06860000     2186.487295748786         10.65830800977923    
        6.07240000     2189.636524228375         10.70900649923524    
        6.07620000     2197.971400831728         10.63765471889924    
        6.08000000     2199.497676385326         10.59066389832913    
        6.08380000     2195.873326763337         10.53753866431247    
        6.08760000     2197.820005040437         10.65707104870198    
        6.09140000     2203.899763938001         10.71220781796468    
        6.09520000     2198.120892374549         10.68262888556692    
        6.09900000     2203.935638494688         10.71121130775032    
        6.10280000     2197.226926125737         10.61904563999291    
        6.10660000     2197.872915832801         10.56407094809978    
        6.11040000     2197.174860276753         10.64808648251508    
        6.11420000     2196.276524033832         10.70336953007174    
        6.11800000     2200.873576496611         10.66651139092185    
        6.12180000     2207.869369298446         10.77272975354873    
        6.12560000     2192.913021068953         10.56912825260799    
        6.12940000     2200.058008966345         10.57966930803067    
        6.13320000     2199.882154548668         10.61897232162999    
        6.13700000     2187.847379353779         10.55635965990860    
        6.14080000     2198.707898539703         9.638904113579372    
        6.14460000     2200.114234377286         9.183683287555167    
        6.14840000     2199.482225100814         9.154456096971883    
        6.15220000     2201.154490537670         9.172869010377683    
        6.15600000     2195.936384697945         9.160522519294924    
        6.15980000     2198.155642160713         9.159672348110831    
        6.16360000     2196.983971132410         9.123947800988736    
        6.16740000     2194.655508379525         9.136921773566080    
        6.17120000     2202.831910281920         9.276913217434931    
        6.17500000     2197.167702243438         9.193717923612242    
        6.17880000     2197.062231529957         9.137297065529831    
        6.18260000     2195.399984010868         9.163271599869477    
        6.18640000     2190.019180645611         9.235704001663402    
        6.19020000     2204.586857595013         9.264418809449239    
        6.19400000     2205.018288612580         9.254598878839529    
        6.19780000     2201.700728868697         9.261862886426176    
        6.20160000     2199.399479518357         9.237423251711725    
        6.20540000     2198.102205213571         9.172561871487735    
        6.20920000     2199.562470126265         9.196834897458631    
        6.21300000     2197.558896718488         9.146635663226366    
        6.21680000     2198.285103238333         9.201327361237137    
        6.22060000     2200.050359263042         9.227332898827965    
        6.22440000     2211.253789587562         9.258972946427827    
        6.22820000     2209.626680869471         9.201339584532599    
        6.23200000     2213.098921492700         9.272030375595914    
        6.23580000     2222.016637341283         9.321433132439180    
        6.23960000     2220.480321853312         9.255895956493951    
        6.24340000     2223.760618835748         9.294799863983201    
        6.24720000     2223.985650115862         9.227357021008936    
        6.25100000     2225.014723428890         9.198741462998106    
        6.25480000     2225.043241471273         9.303928468635624    
        6.25860000     2219.974378544437         9.237660964340948    
        6.26240000     2226.907165925655         9.267197809649785    
        6.26620000     2237.339475208804         9.373015464643752    
        6.27000000     2232.756651562754         9.295677728441792    
        6.27380000     2233.674558272551         9.342038597117053    
        6.27760000     2237.156353917928         9.349329646052812    
        6.28140000     2237.333799732822         9.342772047081626    
        6.28520000     2236.457566627803         9.314107928636695    
        6.28900000     2234.728872446611         9.403721940413247    
        6.29280000     2235.483420024299         9.391063002980534    
        6.29660000     2229.529485744065         9.357047131000636    
        6.30040000     2233.212586799228         9.342418246756358    
        6.30420000     2236.220907938396         9.379400762320692    
        6.30800000     2233.061710702450         9.337637408313924    
        6.31180000     2239.349884643249         9.353015839137377    
        6.31560000     2236.170100131717         9.358856060454075    
        6.31940000     2239.725018213067         9.426892404081418    
        6.32320000     2242.629693902151         9.355859437468119    
        6.32700000     2242.398747638706         9.392296060485199    
        6.33080000     2233.572138272929         9.272481419736209    
        6.33460000     2241.902036100201         9.292829754332830    
        6.33840000     2249.888675182487         9.317433236953027    
        6.34220000     2247.944841159700         9.370551942521677    
        6.34600000     2250.489148490257         9.347981396144061    
        6.34980000     2248.725915703657         9.403587571805382    
        6.35360000     2256.426145070487         9.397807966132177    
        6.35740000     2265.037291750008         9.434062868083167    
        6.36120000     2256.888715633013         9.443289269300253    
        6.36500000     2267.167161614760         9.516119043606036    
        6.36880000     2268.522727723407         9.528506517510005    
        6.37260000     2272.763443279592         9.564914447359083    
        6.37640000     2285.370522575375         9.487609096124267    
        6.38020000     2297.271227503946         9.547163797837070    
        6.38400000     2308.374886650306         9.545038445023323    
        6.38780000     2313.270157276507         9.628125757207577    
        6.39160000     2326.701668046284         9.734116100926697    
        6.39540000     2334.325475967061         9.724965020196707    
        6.39920000     2360.604632903827         9.841627812929433    
        6.40300000     2373.799891173991         9.874742884992225    
        6.40680000     2406.704197591217         9.884673255865964    
        6.41060000     2417.415813238778         10.02506648561529    
        6.41440000     2445.769235136953         10.16430218834074    
        6.41820000     2464.523681444839         10.18030063721048    
        6.42200000     2500.494398471987         10.41872843858540    
        6.42580000     2513.190879931089         10.33440493044169    
        6.42960000     2541.246512244602         10.39874674870408    
        6.43340000     2573.215754022362         10.54272785916307    
        6.43720000     2617.422774801264         10.67203192423459    
        6.44100000     2648.530856622769         10.81639196979331    
        6.44480000     2692.747192915317         11.00087850627688    
        6.44860000     2737.155772614303         11.09304634441879    
        6.45240000     2791.983434998018         11.24965780161620    
        6.45620000     2840.025894917485         11.51693432444050    
        6.46000000     2894.165486068413         11.67635897379664    
        6.46380000     2951.476989436209         11.77485108273123    
        6.46760000     2996.832680320059         11.96922198868228    
        6.47140000     3033.272675619783         12.26885115099061    
        6.47520000     3066.140757018231         12.32589203231524    
        6.47900000     3074.073756685367         12.30992615821708    
        6.48280000     3066.274115655762         12.34204042141773    
        6.48660000     3039.169776983675         12.33891643595413    
        6.49040000     2993.655176441226         12.08951370953098    
        6.49420000     2934.191336905445         11.87839450978018    
        6.49800000     2868.955081595323         11.67270474192293    
        6.50180000     2812.160844837309         12.09355862739038    
        6.50560000     2743.647576943024         12.29853029746310    
        6.50940000     2674.742922406871         11.01272897636237    
        6.51320000     2619.708921822421         10.65724757263834    
        6.51700000     2575.299479010734         10.54719219194116    
        6.52080000     2532.763515949558         10.42307919856518    
        6.52460000     2498.999714447296         10.31932469028147    
        6.52840000     2463.302613029120         10.17122326643210    
        6.53220000     2442.000599801777         10.12059830155309    
        6.53600000     2408.502119773947         10.02563811277702    
        6.53980000     2382.693292610561         9.885395601696771    
        6.54360000     2367.529512516234         9.773758832283885    
        6.54740000     2351.647229702231         9.732985484576124    
        6.55120000     2334.434854460242         9.661738119292972    
        6.55500000     2311.488531382770         9.552240659005550    
        6.55880000     2288.937855159890         9.475162242113077    
        6.56260000     2276.937013192799         9.474582330318210    
        6.56640000     2266.171324025097         9.479210249393962    
        6.57020000     2246.848547947690         9.394484318064803    
        6.57400000     2236.403045316466         9.347812467186229    
        6.57780000     2233.553662255647         9.302683330009600    
        6.58160000     2222.390347115811         9.254140626640691    
        6.58540000     2226.353381897447         9.277701212539156    
        6.58920000     2221.464748562953         9.335852573767674    
        6.59300000     2209.033205080060         9.317748223565518    
        6.59680000     2203.585671101263         9.262623556875591    
        6.60060000     2203.505506770238         9.197351106775907    
        6.60440000     2198.895066126297         9.229803626713268    
        6.60820000     2197.806180803826         9.218125641910650    
        6.61200000     2194.409400839414         9.148193640923349    
        6.61580000     2196.190899684627         9.181391239694806    
        6.61960000     2189.586534271239         9.254980801469626    
        6.62340000     2192.017821297701         9.184193891700305    
        6.62720000     2188.579836857759         9.146010461057651    
        6.63100000     2185.317865271438         9.074679757342334    
        6.63480000     2186.768845616582         9.125161054010139    
        6.63860000     2177.349052425456         9.071401057339767    
        6.64240000     2175.717867784264         9.115894896883313    
        6.64620000     2181.235622015061         9.160899112854523    
        6.65000000     2180.005187167958         9.107753830377504    
        6.65380000     2177.904747353227         9.113298901905292    
        6.65760000     2184.559490113554         9.157040164122460    
        6.66140000     2173.098251549316         9.152829856498228    
        6.66520000     2167.540205175449         9.205155122929146    
        6.66900000     2174.957923325355         9.187736014217293    
        6.67280000     2167.191672453068         9.166193699690135    
        6.67660000     2171.060654137061         9.108393601985453    
        6.68040000     2175.671012641645         9.117990382276117    
        6.68420000     2181.502338401387         9.092928122848891    
        6.68800000     2164.701215891893         9.073602053431097    
        6.69180000     2167.629988531972         9.152834733147142    
        6.69560000     2162.668894397755         9.068608454460476    
        6.69940000     2173.436117590131         9.116937144903462    
        6.70320000     2165.371141456044         9.168965587616610    
        6.70700000     2163.370012840181         9.040736069162257    
        6.71080000     2164.279933356681         9.060569137363848    
        6.71460000     2174.928347083098         9.110506354078089    
        6.71840000     2172.318689884571         9.080440151157640    
        6.72220000     2165.604865583341         9.187661334380001    
        6.72600000     2169.604459248750         9.082457495779497    
        6.72980000     2166.744608484110         9.078585418625185    
        6.73360000     2167.485797732058         9.065913006009932    
        6.73740000     2174.462023717238         9.061841170810325    
        6.74120000     2164.157333948755         9.077102314936385    
        6.74500000     2161.369516870494         9.121661578770107    
        6.74880000     2156.285545424952         9.013933623292582    
        6.75260000     2163.410889565158         8.989724977304386    
        6.75640000     2166.015755572160         9.133079885093418    
        6.76020000     2164.434389694481         9.067363740741305    
        6.76400000     2158.211689639726         8.957353677919304    
        6.76780000     2162.407593677585         9.036702786025050    
        6.77160000     2163.675829846818         9.135368233343325    
        6.77540000     2161.043907559757         9.079039694861054    
        6.77920000     2166.209192386088         9.077362602798924    
        6.78300000     2160.756611674617         9.071596363629604    
        6.78680000     2154.772580413442         9.113213556578573    
        6.79060000     2166.230698465678         9.103727876925680    
        6.79440000     2162.455477293079         9.089447065434786    
        6.79820000     2157.058768736550         9.137021986795286    
        6.80200000     2168.253720550578         9.137955742017526    
        6.80580000     2160.685739813538         9.080507001762593    
        6.80960000     2154.604398527995         9.025211906092652    
        6.81340000     2161.256211364124         9.081458237690816    
        6.81720000     2164.393806368008         9.096448170257128    
        6.82100000     2169.377206767100         9.123931328337928    
        6.82480000     2155.927355018773         9.094947540403522    
        6.82860000     2161.542728199330         9.103521393126057    
        6.83240000     2159.561991824040         9.041021689112226    
        6.83620000     2153.589358739710         9.082357758349938    
        6.84000000     2158.209495807655         9.113656348140827    
        6.84380000     2158.935026513966         9.024238719931141    
        6.84760000     2163.039489095941         9.061844626063149    
        6.85140000     2156.435932902445         9.039835395027740    
        6.85520000     2151.929400444285         8.979647858002711    
        6.85900000     2163.773402973146         9.042159046957298    
        6.86280000     2158.732924343509         9.053278303693112    
        6.86660000     2155.202711966213         9.055581806387728    
        6.87040000     2159.666919477878         9.071500217001425    
        6.87420000     2152.222253357418         9.002544295941076    
        6.87800000     2161.452932329805         9.020761744156918    
        6.88180000     2165.665885584685         9.068647919634014    
        6.88560000     2153.498546261679         9.045663591896782    
        6.88940000     2155.173420391128         9.112343380935801    
        6.89320000     2158.579285265208         9.080731175088987    
        6.89700000     2153.489446760271         9.080838302646486    
        6.90080000     2154.368583548853         9.003418803730817    
        6.90460000     2159.630813579804         9.076558265084198    
        6.90840000     2156.492588268820         9.110684237964623    
        6.91220000     2152.778764257023         8.994484068584114    
        6.91600000     2151.623127917342         9.012210065503895    
        6.91980000     2150.368107959017         9.115273750270427    
        6.92360000     2153.969984403936         9.095138408395334    
        6.92740000     2150.474641245653         9.044260401872174    
        6.93120000     2149.971228807800         8.965412818922763    
        6.93500000     2150.868998043355         9.002794358583987    
        6.93880000     2150.233798439744         9.002658461194869    
        6.94260000     2156.753201857302         9.036754628410240    
        6.94640000     2159.598945779082         9.049812850640851    
        6.95020000     2156.019165860443         9.073342131484123    
        6.95400000     2154.853103942764         9.053467568544390    
        6.95780000     2152.497328323372         9.048851322953819    
        6.96160000     2152.208321337499         9.062554025424642    
        6.96540000     2152.592203548954         9.131199621130071    
        6.96920000     2153.919361142414         9.127233608300134    
        6.97300000     2148.118099296860         9.118049275571277    
        6.97680000     2152.850801449352         9.055071933807206    
        6.98060000     2152.669722831310         9.081678775392909    
        6.98440000     2156.681936124980         9.033513083137105    
        6.98820000     2153.325398410160         9.020045598720319    
        6.99200000     2151.105984045379         9.087171893111066    
        6.99580000     2145.016925520063         9.022516231540690    
        6.99960000     2151.995458544098         9.070956892623899    
        7.00340000     2163.527563710986         9.165907985686991    
        7.00720000     2146.604978423684         9.010541289807799    
        7.01100000     2144.326093719706         9.012194907593926    
        7.01480000     2148.259188093887         9.062308249782919    
        7.01860000     2144.770729840727         9.008588073960338    
        7.02240000     2153.686261556169         9.126731322675809    
        7.02620000     2158.145555221492         9.075358313882713    
        7.03000000     2157.249106534238         9.062906441627499    
        7.03380000     2152.060516535337         9.047435599314269    
        7.03760000     2146.760479811419         8.993936981598530    
        7.04140000     2142.603676134595         9.042803898249732    
        7.04520000     2140.568541276836         9.047578400123593    
        7.04900000     2144.421512948287         8.961202189435204    
        7.05280000     2148.211318153381         8.991190899792548    
        7.05660000     2148.270394327149         9.066183230701768    
        7.06040000     2158.459828953750         9.080126365981810    
        7.06420000     2152.954295980367         9.038477681419653    
        7.06800000     2153.154824065552         9.064555440044249    
        7.07180000     2150.988177519453         9.133222995883097    
        7.07560000     2148.053331625176         9.013855436564624    
        7.07940000     2153.286098446630         9.049657536385071    
        7.08320000     2147.330123152515         8.974216199386928    
        7.08700000     2150.582762921169         9.064913542193910    
        7.09080000     2144.483533420588         9.013915318356521    
        7.09460000     2152.475040711615         9.015351581522133    
        7.09840000     2156.500273739003         9.087046615773076    
        7.10220000     2155.336094817555         9.125168122124990    
        7.10600000     2142.702098791631         9.047158773899655    
        7.10980000     2148.667842250274         8.987911785259429    
        7.11360000     2148.810214725787         9.060323259972986    
        7.11740000     2148.861475139896         9.041239790145958    
        7.12120000     2150.396647064722         9.009977983413116    
        7.12500000     2158.685283301263         9.099213418368127    
        7.12880000     2142.133070275781         9.010022785819761    
        7.13260000     2147.572404744846         9.022081693147829    
        7.13640000     2151.232729511075         9.142474007170330    
        7.14020000     2147.408882317741         9.030436229447968    
        7.14400000     2148.213946725367         8.999971728525759    
        7.14780000     2152.693837530247         9.099599439565347    
        7.15160000     2153.353380183432         9.047574858043284    
        7.15540000     2145.799907286915         8.955336188408982    
        7.15920000     2159.990275661788         9.054201337788884    
        7.16300000     2164.957182328321         9.106956435647204    
        7.16680000     2161.963008510555         9.076302797340198    
        7.17060000     2154.164719537888         9.062632590468874    
        7.17440000     2153.659163908131         8.969516869883881    
        7.17820000     2155.447802303121         8.942473106472317    
        7.18200000     2155.298920467553         9.010699156345895    
        7.18580000     2155.457052283398         9.054306819725671    
        7.18960000     2156.602193417306         9.115742671311967    
        7.19340000     2159.980809135832         9.080144103453474    
        7.19720000     2161.560810736418         9.074932827935388    
        7.20100000     2162.683862472533         9.066696920298197    
        7.20480000     2165.744533972477         9.121019289184666    
        7.20860000     2161.292530870144         9.055308929260621    
        7.21240000     2157.588032240385         9.022060603362680    
        7.21620000     2156.257476885210         9.030236668487023    
        7.22000000     2155.187240420128         9.086824490803769    
        7.22380000     2162.022416834947         9.083579341725159    
        7.22760000     2166.274517938390         9.099369320606264    
        7.23140000     2161.985457891603         9.046120495315684    
        7.23520000     2151.484512205916         9.006661905840289    
        7.23900000     2156.747615132444         9.022655648444925    
        7.24280000     2157.505499970966         8.988050577469263    
        7.24660000     2163.370214948850         9.000124055332984    
        7.25040000     2163.668464442715         9.091180992879918    
        7.25420000     2153.090930585317         9.070649114992351    
        7.25800000     2160.405102315640         9.088935146244220    
        7.26180000     2165.454875302546         9.140541050282179    
        7.26560000     2162.165547698526         9.135512782851439    
        7.26940000     2161.516813569135         9.121524125819976    
        7.27320000     2170.344108175759         9.159195010639673    
        7.27700000     2173.767993070784         9.108378103430677    
        7.28080000     2176.472198423390         9.149362587822838    
        7.28460000     2175.213574288599         9.084392301996449    
        7.28840000     2177.058271864643         9.098828199505368    
        7.29220000     2178.866278590523         9.162022503526249    
        7.29600000     2169.851394296282         9.121953873292961    
        7.29980000     2186.781608778272         9.163888175190660    
        7.30360000     2187.703437019384         9.247373165197370    
        7.30740000     2178.849020214505         9.119655616387572    
        7.31120000     2171.276067800845         9.087265814486125    
        7.31500000     2178.072353898493         9.131329320812304    
        7.31880000     2175.467080130764         9.110513628527224    
        7.32260000     2168.596514380676         9.151995687916417    
        7.32640000     2169.971176132051         9.114861941440713    
        7.33020000     2163.696676537634         9.084696303677623    
        7.33400000     2162.093313298164         9.040236068097176    
        7.33780000     2163.397856198691         9.035723410688542    
        7.34160000     2155.181390041408         9.055377114389952    
        7.34540000     2155.829272580310         9.084206255416369    
        7.34920000     2158.836651973993         9.013678136057420    
        7.35300000     2153.113068159761         8.996535749564323    
        7.35680000     2148.765607486519         9.080402425138335    
        7.36060000     2154.497328496633         9.068209229865174    
        7.36440000     2154.059916647222         9.032184676436877    
        7.36820000     2155.047316569824         9.070096067342472    
        7.37200000     2143.944655505423         9.068501374087527    
        7.37580000     2146.710095916402         9.032459801626436    
        7.37960000     2151.734902945820         9.066802071493463    
        7.38340000     2142.255242550291         8.954903876679298    
        7.38720000     2145.652809575790         9.014096030702328    
        7.39100000     2135.126951794099         8.989484134007297    
        7.39480000     2138.424283096087         8.995552763270982    
        7.39860000     2140.763842920527         8.990848775847576    
        7.40240000     2139.193403463233         9.018719865171617    
        7.40620000     2143.102406129243         9.017136943535855    
        7.41000000     2136.415822166618         8.936731008583783    
        7.41380000     2138.835489729883         9.045807256643398    
        7.41760000     2136.061739832721         9.011545718243083    
        7.42140000     2139.130010036560         8.960514280228738    
        7.42520000     2139.582390286825         9.040298082771635    
        7.42900000     2144.376575147043         9.046877844253785    
        7.43280000     2136.223572572804         9.012087480322020    
        7.43660000     2139.104166917132         9.078163389548903    
        7.44040000     2145.664654113232         9.066023218781813    
        7.44420000     2144.102955254108         9.002896156192371    
        7.44800000     2150.966885264953         9.097798582759287    
        7.45180000     2150.282216189903         9.116864511908316    
        7.45560000     2150.166806214973         9.048891230359558    
        7.45940000     2155.653198541517         9.070470989624518    
        7.46320000     2153.438063584465         9.090616972103582    
        7.46700000     2132.451102177947         8.975283192380040    
        7.47080000     2140.749493203039         9.022592301481794    
        7.47460000     2147.175841276229         8.934335850967633    
        7.47840000     2151.850024009307         8.965306197849582    
        7.48220000     2153.379336807565         8.990634211396783    
        7.48600000     2153.906923364265         9.073945797009406    
        7.48980000     2155.685939327282         9.047531281986625    
        7.49360000     2139.148888247758         9.009256927903326    
        7.49740000     2139.119667880874         8.986748511640343    
        7.50120000     2138.762298266965         8.982076653788434    
        7.50500000     2140.343703651096         9.025262302461652    
        7.50880000     2130.710792175418         8.907419236357716    
        7.51260000     2132.512484978687         8.925153441046909    
        7.51640000     2137.334524801750         8.991337287187324    
        7.52020000     2143.351117218654         9.047325803924524    
        7.52400000     2146.141605665855         9.038229103714908    
        7.52780000     2143.086551939923         9.024640792810255    
        7.53160000     2136.600430372463         8.999296370850214    
        7.53540000     2141.248074354654         8.994193926039914    
        7.53920000     2133.762338198349         8.976612092381721    
        7.54300000     2143.050351574952         8.953338998428217    
        7.54680000     2147.355489697927         9.060498358519975    
        7.55060000     2136.443655656438         8.957195959743308    
        7.55440000     2142.431723086224         8.987537473023938    
        7.55820000     2144.338962311746         9.059382033997784    
        7.56200000     2140.003121570016         9.009034220284864    
        7.56580000     2134.676360385603         9.046134307811823    
        7.56960000     2143.600103570003         9.003787644410744    
        7.57340000     2143.650576419951         9.075583282202919    
        7.57720000     2147.128925224480         9.080201778326279    
        7.58100000     2154.028815350508         9.084813909166366    
        7.58480000     2146.828947825752         8.985342693094017    
        7.58860000     2143.007082958359         8.996802238997377    
        7.59240000     2142.833182375252         9.000817735159416    
        7.59620000     2141.012585385001         9.036029202173248    
        7.60000000     2149.866848052796         9.026839860783101    
        7.60380000     2149.466451019679         9.070098024955657    
        7.60760000     2153.078592797805         9.064136734196275    
        7.61140000     2155.328981953994         9.045309293026792    
        7.61520000     2151.643519132214         9.031419136522082    
        7.61900000     2158.877512581218         9.023116724029943    
        7.62280000     2155.318443362127         9.072617281935356    
        7.62660000     2157.377566584062         9.048347742595078    
        7.63040000     2166.081365322578         9.059984651735494    
        7.63420000     2172.522827889950         9.032285281532836    
        7.63800000     2178.117900099847         9.095728147889082    
        7.64180000     2180.076175610707         9.168863578922707    
        7.64560000     2184.460169396083         9.180482391176664    
        7.64940000     2196.468848088547         9.152768493687955    
        7.65320000     2198.998719558751         9.199083782485529    
        7.65700000     2206.888115268187         9.235629139146928    
        7.66080000     2216.269190917285         9.213222455107765    
        7.66460000     2216.979983346518         9.251094355268343    
        7.66840000     2238.990815119744         9.319383233664675    
        7.67220000     2247.135367516673         9.411406627166524    
        7.67600000     2265.923283817151         9.420859979904801    
        7.67980000     2292.981246351267         9.528506597898778    
        7.68360000     2326.556427552468         9.585499945714179    
        7.68740000     2347.527379171276         9.743347982333075    
        7.69120000     2395.926632053475         9.971096093885128    
        7.69500000     2454.590533801509         11.23884538270157    
        7.69880000     2532.598321729633         11.09859297056503    
        7.70260000     2614.658572309421         13.60735556135077    
        7.70640000     2737.513517723014         15.15842728300592    
        7.71020000     2889.656262545904         18.18080423963734    
        7.71400000     3093.561698167811         20.62424694910331    
        7.71780000     3296.373294014855         20.70056853624954    
        7.72160000     3530.761728669255         23.85313017678327    
        7.72540000     3757.911928702194         21.74725668165499    
        7.72920000     3901.988430711300         17.85057072709304    
        7.73300000     3992.811116259062         15.57215238348954    
        7.73680000     4007.378979319514         15.79323991686550    
        7.74060000     3952.311216724597         15.48549689086176    
        7.74440000     3832.026573613956         17.69075005996358    
        7.74820000     3696.652271959510         18.76734691225085    
        7.75200000     3529.336103749029         19.35597697039296    
        7.75580000     3372.741416034157         17.14411219054609    
        7.75960000     3236.707728141748         16.43268829573007    
        7.76340000     3120.087788088469         14.68661598922918    
        7.76720000     3013.551431298887         13.91908609777983    
        7.77100000     2926.564368463945         12.47016530605319    
        7.77480000     2852.001744325127         11.41876324964901    
        7.77860000     2781.818593188919         11.49086580403369    
        7.78240000     2711.443190539677         11.18295718583134    
        7.78620000     2637.329136121565         11.97909328008530    
        7.79000000     2576.122486789887         10.54623318803674    
        7.79380000     2513.439259697637         10.62485008090832    
        7.79760000     2450.184636182254         10.09520020948048    
        7.80140000     2409.950158482790         10.01714770464349    
        7.80520000     2369.594424988357         9.849792835531932    
        7.80900000     2339.171576580315         9.680755530634411    
        7.81280000     2309.674371972593         9.566802124849721    
        7.81660000     2284.046455059772         9.525182707906207    
        7.82040000     2265.715093049251         9.504828973853336    
        7.82420000     2249.539351121899         9.427146710158560    
        7.82800000     2246.681695878159         9.389575666923582    
        7.83180000     2233.546174095839         9.367489069904181    
        7.83560000     2225.774188440068         9.283176207902605    
        7.83940000     2211.630012884012         9.267141316960666    
        7.84320000     2213.292847503763         9.233786044418675    
        7.84700000     2207.509600107852         9.239059460639275    
        7.85080000     2201.674192855366         9.198602525933419    
        7.85460000     2196.363487858659         9.121747074439032    
        7.85840000     2192.375899809138         9.232554737272132    
        7.86220000     2188.311517164776         9.183257488827145    
        7.86600000     2185.131784931858         9.168646678011166    
        7.86980000     2182.632408735218         9.107519380649775    
        7.87360000     2182.527059560650         9.229834338846024    
        7.87740000     2180.297726445388         9.138381600393448    
        7.88120000     2184.766838062855         9.148091195826895    
        7.88500000     2179.673201209961         9.146374557305888    
        7.88880000     2199.293338603660         9.178118071414513    
        7.89260000     2193.836682062600         9.106361272890211    
        7.89640000     2200.183000207356         9.236466178206223    
        7.90020000     2217.232121784169         9.311970759607608    
        7.90400000     2232.480968136040         9.315057988113729    
        7.90780000     2235.868670943931         9.429542176414783    
        7.91160000     2242.521094881778         9.382296950878624    
        7.91540000     2246.588968457319         9.399167583807698    
        7.91920000     2252.840647518927         9.415975283105881    
        7.92300000     2251.714323300401         9.429808028331276    
        7.92680000     2248.753392675164         9.380736333915630    
        7.93060000     2240.364894725494         9.312666653253466    
        7.93440000     2232.968571267661         9.289437563681957    
        7.93820000     2224.046784814031         9.277478674775839    
        7.94200000     2210.699381989610         9.284831733205674    
        7.94580000     2199.096262185421         9.198983896537982    
        7.94960000     2198.632325967942         9.137830328826471    
        7.95340000     2186.438237010837         9.186262533209822    
        7.95720000     2185.431978716082         9.107791241168830    
        7.96100000     2183.336543131347         9.064656848957645    
        7.96480000     2174.060415731435         9.106513065164991    
        7.96860000     2165.422243065962         9.045418476752031    
        7.97240000     2160.655116657121         9.090646706836404    
        7.97620000     2165.223351065598         9.038118381422592    
        7.98000000     2164.596179630697         9.060239714682719    
        7.98380000     2159.375045162055         8.993038034063471    
        7.98760000     2160.194949680907         9.057526295744044    
        7.99140000     2158.258289111107         9.133099492466732    
        7.99520000     2155.423221461059         9.076412506987175    
        7.99900000     2153.462601623572         9.038169019285068    
        8.00280000     2148.170261624995         9.058898065392306    
        8.00660000     2149.521449454247         9.023025524490263    
        8.01040000     2158.196628475255         9.018871061960414    
        8.01420000     2163.293130826916         9.053156536758276    
        8.01800000     2155.856550998722         9.043749791796987    
        8.02180000     2150.738318090217         9.015621489010867    
        8.02560000     2159.365108840090         9.082166575057350    
        8.02940000     2157.289842582580         9.034294648197900    
        8.03320000     2145.328154740780         9.062867672024574    
        8.03700000     2157.936964237061         9.119699613551742    
        8.04080000     2149.142482605929         9.067137127927822    
        8.04460000     2149.384569647654         9.019245954441239    
        8.04840000     2149.996486620088         9.053343906313357    
        8.05220000     2150.258273530345         9.077714692197427    
        8.05600000     2153.672846949890         9.091435452148081    
        8.05980000     2155.388566783071         9.045989383223786    
        8.06360000     2158.158266317097         9.104735631564113    
        8.06740000     2153.782922535473         9.046733784928469    
        8.07120000     2157.395587061942         9.077427895647100    
        8.07500000     2153.687593556066         8.963746761165785    
        8.07880000     2156.657651202282         9.000982308099065    
        8.08260000     2155.006480824271         8.970504511683206    
        8.08640000     2152.358784396474         9.008005055439755    
        8.09020000     2150.684966896792         9.007879553178919    
        8.09400000     2147.042944602842         9.014731779288427    
        8.09780000     2153.569927794699         9.010657932433794    
        8.10160000     2154.031337241947         9.062515291677817    
        8.10540000     2152.176914106803         9.052349180495517    
        8.10920000     2153.660148277216         8.996039832153098    
        8.11300000     2149.677921445445         8.978335563517621    
        8.11680000     2148.007929346168         9.016710895921882    
        8.12060000     2156.745129554741         9.060856027280673    
        8.12440000     2152.782648871947         9.056280476246927    
        8.12820000     2157.476932811034         9.045939620976281    
        8.13200000     2160.774584473739         9.103870609057683    
        8.13580000     2155.780018517155         9.062652793677083    
        8.13960000     2156.110873706380         9.086093138873609    
        8.14340000     2167.631201066207         9.096010428322645    
        8.14720000     2161.556809378523         9.119503410303773    
        8.15100000     2168.607632250206         9.059461799338530    
        8.15480000     2170.476281792979         9.014794015817607    
        8.15860000     2172.416540944593         9.148041277499489    
        8.16240000     2166.367284564703         9.110635690312902    
        8.16620000     2154.685236106209         9.041051766966575    
        8.17000000     2160.695327170527         9.014390622667717    
        8.17380000     2167.713542385497         9.170264126976821    
        8.17760000     2169.558260871840         9.116363664981133    
        8.18140000     2175.009182651937         9.110517930542674    
        8.18520000     2176.633413179606         9.131301426145473    
        8.18900000     2183.263672947037         9.160100820373899    
        8.19280000     2179.296695565737         9.046589107703284    
        8.19660000     2181.666740515668         9.129329224729524    
        8.20040000     2179.062317696265         9.193458114531001    
        8.20420000     2187.075853603450         9.174726153969868    
        8.20800000     2180.143168237460         9.231474440247460    
        8.21180000     2192.999616943089         9.152311595774753    
        8.21560000     2199.167064583089         9.201558781042795    
        8.21940000     2188.270745892160         9.173928996205124    
        8.22320000     2191.253590036617         9.186212630010036    
        8.22700000     2198.706350276679         9.159576944488407    
        8.23080000     2200.168181940973         9.170149094996443    
        8.23460000     2212.011914042092         9.305220224660435    
        8.23840000     2217.743889598340         9.255245250317499    
        8.24220000     2219.142006327466         9.269487588168213    
        8.24600000     2238.032886534339         9.350379233254433    
        8.24980000     2243.673091716207         9.310957153332314    
        8.25360000     2262.210166498755         9.486500425294569    
        8.25740000     2279.167924948895         9.469507490625398    
        8.26120000     2308.356431303115         9.513563059967890    
        8.26500000     2342.925235538019         9.683821928180008    
        8.26880000     2377.829486604445         9.812290458950271    
        8.27260000     2428.881996058110         10.43464653056243    
        8.27640000     2490.508827898792         10.30974717756045    
        8.28020000     2541.523797801596         10.34691866104614    
        8.28400000     2594.504195876539         10.55132934487430    
        8.28780000     2637.864926778701         10.74157789904198    
        8.29160000     2662.533945574507         10.94555790971389    
        8.29540000     2665.510732563182         10.95475318066938    
        8.29920000     2653.988923169597         10.81996668418680    
        8.30300000     2624.940508938997         10.71094090113345    
        8.30680000     2584.782832046284         10.63713303211203    
        8.31060000     2534.221746008989         10.39785968477193    
        8.31440000     2487.462853938291         10.21940680346840    
        8.31820000     2446.352517355016         10.89309027920288    
        8.32200000     2410.517330493379         9.946050069796572    
        8.32580000     2386.289194763383         9.906769287274765    
        8.32960000     2358.867182236072         9.845211324452912    
        8.33340000     2328.595729150055         9.735319550450631    
        8.33720000     2304.375968817669         9.604921897618434    
        8.34100000     2297.375488471734         9.592795919478272    
        8.34480000     2289.865201612049         9.555639693225807    
        8.34860000     2286.050416015818         9.504178752010729    
        8.35240000     2273.570542069978         9.512796361746405    
        8.35620000     2265.756769197432         9.504588509328530    
        8.36000000     2263.993415233879         9.466371673619403    
        8.36380000     2258.891047938789         9.443790313031007    
        8.36760000     2266.868063912842         9.463642468054278    
        8.37140000     2265.943213340620         9.454161648673852    
        8.37520000     2277.589897739854         9.399413493312377    
        8.37900000     2285.991639299848         9.504742145399618    
        8.38280000     2285.824910236566         9.452759249235658    
        8.38660000     2292.819135599702         9.524526226326499    
        8.39040000     2300.011804110695         9.518280102397023    
        8.39420000     2308.837469890145         9.592575210546253    
        8.39800000     2321.457074276585         9.646178958841233    
        8.40180000     2335.825647166663         9.691898055298692    
        8.40560000     2357.429086274306         9.777355328295354    
        8.40940000     2378.546817175211         9.801048772325194    
        8.41320000     2400.667111796607         9.899804728041223    
        8.41700000     2431.754858061545         10.10663764716168    
        8.42080000     2465.244747070360         10.15643963977208    
        8.42460000     2505.783757400926         10.32419329006464    
        8.42840000     2570.499415760521         11.50272476799202    
        8.43220000     2629.138485504080         10.85919353271855    
        8.43600000     2713.044533933874         13.44649905920372    
        8.43980000     2817.255352475695         15.12343721825054    
        8.44360000     2958.518444912040         17.17819241161853    
        8.44740000     3123.494290016212         19.08109579295653    
        8.45120000     3322.947455274045         21.43512779915580    
        8.45500000     3549.390199571897         23.08304716199128    
        8.45880000     3816.906421779461         26.15938207247752    
        8.46260000     4092.684921964325         26.50519591843789    
        8.46640000     4381.549735006799         27.96113816271494    
        8.47020000     4618.186644484655         24.52042981319854    
        8.47400000     4820.596241407668         22.70429706182586    
        8.47780000     4948.495495174519         19.14971747084022    
        8.48160000     5008.525436170617         19.21961077437598    
        8.48540000     4969.668713580249         19.06784667428020    
        8.48920000     4897.852005212004         18.91929706411179    
        8.49300000     4746.396651953790         23.47430187988748    
        8.49680000     4552.492491012012         23.17628944308728    
        8.50060000     4354.540596225770         23.52280105578388    
        8.50440000     4153.360263361250         22.67107565869703    
        8.50820000     3961.937452565131         21.00457313346226    
        8.51200000     3792.897220046674         19.49106271593891    
        8.51580000     3639.754591290235         18.33362072791294    
        8.51960000     3514.517746804943         16.08449598466089    
        8.52340000     3391.179318360562         16.08833826037982    
        8.52720000     3279.971599757373         15.21348870518493    
        8.53100000     3178.961307641894         14.68324270616531    
        8.53480000     3098.710616810369         13.69127703714686    
        8.53860000     3011.581867305295         12.98766135214981    
        8.54240000     2930.048219248912         12.37055940872764    
        8.54620000     2851.034922655238         11.74872192536849    
        8.55000000     2786.060412160421         11.29131008307954    
        8.55380000     2726.933642065652         11.14215559466431    
        8.55760000     2662.472842501645         10.84952093206405    
        8.56140000     2603.509749144250         10.58831402859357    
        8.56520000     2573.133803111853         10.54792762220354    
        8.56900000     2532.702077329259         10.40666931933241    
        8.57280000     2502.243702993467         10.24581479212579    
        8.57660000     2466.293521033628         10.10455198939677    
        8.58040000     2439.875267717734         10.01949257138024    
        8.58420000     2417.462546097066         9.972737906622784    
        8.58800000     2400.367196380392         9.932517353638511    
        8.59180000     2393.395818186974         9.981691771273855    
        8.59560000     2380.485124522687         9.881486986421729    
        8.59940000     2358.792208761862         9.777754501406763    
        8.60320000     2354.647791474536         9.769779108611276    
        8.60700000     2344.186753055099         9.803462700890778    
        8.61080000     2342.492472227805         9.678993722217447    
        8.61460000     2335.528351184061         9.642680296211287    
        8.61840000     2330.477105118134         10.25659453828485    
        8.62220000     2317.884815663849         9.653344875058979    
        8.62600000     2318.199641578402         9.619997876676257    
        8.62980000     2328.777150789392         9.707089801411531    
        8.63360000     2325.170351003427         9.684530832989150    
        8.63740000     2319.885789034208         9.669355176335422    
        8.64120000     2322.049993090728         9.593534677340278    
        8.64500000     2322.695803152380         9.662358269774057    
        8.64880000     2321.121724998222         9.641041204485751    
        8.65260000     2320.785132996482         9.667799197469369    
        8.65640000     2320.679540785655         9.565529174588212    
        8.66020000     2319.538730823040         9.682494573580875    
        8.66400000     2331.113142479721         9.740546811021924    
        8.66780000     2334.738927118432         9.624253018203513    
        8.67160000     2335.614617088114         9.741049353110633    
        8.67540000     2345.261369227264         9.678503435707071    
        8.67920000     2351.865691236687         9.704344306960046    
        8.68300000     2359.597556183474         9.700123614973300    
        8.68680000     2374.777869778598         9.761318341460141    
        8.69060000     2388.104181486286         9.860133259899117    
        8.69440000     2400.571219037377         9.896070350452666    
        8.69820000     2408.173657168912         9.892315892112816    
        8.70200000     2430.410147857469         10.07244009258247    
        8.70580000     2452.906799642117         10.11256392950667    
        8.70960000     2467.988762491725         10.16847286648315    
        8.71340000     2494.465603838544         10.23359543506727    
        8.71720000     2514.134619172247         10.36639245447907    
        8.72100000     2543.236089240420         10.44191504762030    
        8.72480000     2573.821799856031         10.56126375338562    
        8.72860000     2608.275140843534         10.66923829003533    
        8.73240000     2643.324783701743         10.82073089310468    
        8.73620000     2699.595994025156         11.01370659310885    
        8.74000000     2751.531519400108         11.18848270881148    
        8.74380000     2806.813236325043         11.42759525791407    
        8.74760000     2869.574474403834         11.65264621340924    
        8.75140000     2953.715636188154         14.37130071592664    
        8.75520000     3043.860175269443         12.17339134531901    
        8.75900000     3143.781196345104         15.83952443704145    
        8.76280000     3275.769179542210         16.26701652572329    
        8.76660000     3418.756982153885         18.29255988196259    
        8.77040000     3571.570266008607         18.89969543526391    
        8.77420000     3764.573451043626         23.16757669064766    
        8.77800000     3982.895858985658         22.66366458611051    
        8.78180000     4226.695592344883         26.15363011009754    
        8.78560000     4486.634370762341         27.69278069005108    
        8.78940000     4759.513295821399         29.11549560415266    
        8.79320000     5011.231383017217         25.37342058907310    
        8.79700000     5212.471828218963         24.85625606620523    
        8.80080000     5347.131367524799         20.53057710566348    
        8.80460000     5395.702633168120         20.64531667451745    
        8.80840000     5334.857995915534         20.51469041521132    
        8.81220000     5188.662634043470         24.88385591092957    
        8.81600000     4952.250519237798         28.00378725338501    
        8.81980000     4692.307682091164         28.36812811855394    
        8.82360000     4390.498549755213         29.02614788707895    
        8.82740000     4099.661255256711         26.40731176705591    
        8.83120000     3845.841252172749         23.90620316340152    
        8.83500000     3621.104219003336         21.71563707152868    
        8.83880000     3441.751733231514         18.47929960047000    
        8.84260000     3282.336809841010         17.67053444959725    
        8.84640000     3146.996516177819         15.45635997810483    
        8.85020000     3029.907534857625         14.97693271329601    
        8.85400000     2943.999057172576         12.38073471912954    
        8.85780000     2870.197465316627         11.66682954801341    
        8.86160000     2789.061373112393         11.80118330411216    
        8.86540000     2733.055246113783         11.16666417925036    
        8.86920000     2676.632544965460         11.00781082578430    
        8.87300000     2626.322046675868         10.76179272511088    
        8.87680000     2575.728300586890         10.53104308597774    
        8.88060000     2546.956295894483         10.46908647837533    
        8.88440000     2520.860394953765         10.35519774350127    
        8.88820000     2479.422332293742         10.25566831236453    
        8.89200000     2463.425052444187         10.24666299925528    
        8.89580000     2440.102251103613         10.13837776393803    
        8.89960000     2423.601859865102         9.990281942404991    
        8.90340000     2402.939842479290         9.943567215319460    
        8.90720000     2387.827514599984         9.929466135304033    
        8.91100000     2383.625720200825         9.829585191967636    
        8.91480000     2371.950285744271         9.788581661392779    
        8.91860000     2356.192699311646         9.730727136639414    
        8.92240000     2344.748822923783         9.759857736426426    
        8.92620000     2340.331902181275         9.743438538512985    
        8.93000000     2327.233623887415         9.764059901411642    
        8.93380000     2316.135952975036         9.687900399245903    
        8.93760000     2313.949416266918         9.680648107470549    
        8.94140000     2302.771557500052         9.562068545192510    
        8.94520000     2297.132039852303         9.568695963718913    
        8.94900000     2292.419799874789         9.494975859511040    
        8.95280000     2279.480314789863         9.527795647839657    
        8.95660000     2272.135471486872         9.385225712679970    
        8.96040000     2262.810052034406         9.444110665147024    
        8.96420000     2254.766574326192         9.483522802671468    
        8.96800000     2257.736480782420         9.326652756517319    
        8.97180000     2248.594600427712         9.418335621109540    
        8.97560000     2247.620107498012         9.386228159216163    
        8.97940000     2249.922888007826         9.321704151089524    
        8.98320000     2241.974356011273         9.299408626119325    
        8.98700000     2239.704623908915         9.281704805637847    
        8.99080000     2233.999694864939         9.292752519696112    
        8.99460000     2233.943022161480         9.336086576636445    
        8.99840000     2222.803609491256         9.188355184214286    
        9.00220000     2236.655816512984         9.374402861105803    
        9.00600000     2231.021816643705         9.369111300535847    
        9.00980000     2223.748620445069         9.294259754188136    
        9.01360000     2226.288265086889         9.304199918823752    
        9.01740000     2225.236781471424         9.361609883004220    
        9.02120000     2224.348659558606         9.277106974384232    
        9.02500000     2222.078976417581         9.293520933081005    
        9.02880000     2229.286507715452         9.389001963843379    
        9.03260000     2217.618933051265         9.293482304341396    
        9.03640000     2225.980907491213         9.351887008956110    
        9.04020000     2231.178514566385         9.301920263901186    
        9.04400000     2222.550598222806         9.309303773578570    
        9.04780000     2226.318203921494         9.332248883798695    
        9.05160000     2221.231781145565         9.327319252957762    
        9.05540000     2216.699996533297         9.279137380180247    
        9.05920000     2218.649728875058         9.318002988335554    
        9.06300000     2224.551718541328         9.366424937332463    
        9.06680000     2223.864895206948         9.318388799561768    
        9.07060000     2223.446521917574         9.246566934354794    
        9.07440000     2224.174565067764         9.280866573981147    
        9.07820000     2217.373235291339         9.251532296634384    
        9.08200000     2216.347864298650         9.258949334410980    
        9.08580000     2222.101174861442         9.310745440620392    
        9.08960000     2225.956420643673         9.403464079273242    
        9.09340000     2219.658343302619         9.287681398603416    
        9.09720000     2214.887564163513         9.236652531077857    
        9.10100000     2215.524178255499         9.268224721320735    
        9.10480000     2218.072386276128         9.315202054440775    
        9.10860000     2220.960415761696         9.302558905694447    
        9.11240000     2223.221146827196         9.238633024395332    
        9.11620000     2220.708737596602         9.329124876334355    
        9.12000000     2225.947811856820         9.302904059163724    
        9.12380000     2225.866878113165         9.278069497685705    
        9.12760000     2222.431336496432         9.252040488992364    
        9.13140000     2229.810908040712         9.342906170649314    
        9.13520000     2224.186107536801         9.407701892758977    
        9.13900000     2237.681388673659         9.345998544482807    
        9.14280000     2229.265680947828         9.221511749183330    
        9.14660000     2231.698071337492         9.322612622833796    
        9.15040000     2227.356479908927         9.369007882915875    
        9.15420000     2234.668205098011         9.397484692642479    
        9.15800000     2244.521208993906         9.411475529104141    
        9.16180000     2233.375357708095         9.388016285557095    
        9.16560000     2248.719615730611         9.449014136130158    
        9.16940000     2245.187678274196         9.450630812406489    
        9.17320000     2244.264194448179         9.373242118227322    
        9.17700000     2245.345566318037         9.312220383233992    
        9.18080000     2243.528482539048         9.345654309392151    
        9.18460000     2247.863066197807         9.385296145322481    
        9.18840000     2252.512268192039         9.406151677741667    
        9.19220000     2256.628221222472         9.480989917002645    
        9.19600000     2262.615177053318         9.454956549190749    
        9.19980000     2259.921706240541         9.388619404961815    
        9.20360000     2262.794176214263         9.427367090405506    
        9.20740000     2268.564568580037         9.506322870282858    
        9.21120000     2275.429555580458         9.458683802444810    
        9.21500000     2279.290313294263         9.484747557218984    
        9.21880000     2291.556895203131         9.538530090687662    
        9.22260000     2296.826072946305         9.583324003310114    
        9.22640000     2298.455018200514         9.537785233581676    
        9.23020000     2310.243340040884         9.651607907202632    
        9.23400000     2325.566858716583         9.664670714795511    
        9.23780000     2327.679354137746         9.708685785013085    
        9.24160000     2336.642262222592         9.684108885204866    
        9.24540000     2350.110860755542         9.782838814670594    
        9.24920000     2374.136028541486         9.779181849968570    
        9.25300000     2390.542049030208         9.908254277342254    
        9.25680000     2410.678952082018         9.868779122685780    
        9.26060000     2426.261735043785         10.04988396307694    
        9.26440000     2456.593835773730         10.19930827985827    
        9.26820000     2484.913409415637         10.13197206169252    
        9.27200000     2530.997683675501         10.41231864308953    
        9.27580000     2596.188677943834         11.47148104002381    
        9.27960000     2659.852643900429         10.73433096392171    
        9.28340000     2729.976486208227         11.36288729439940    
        9.28720000     2823.619138941155         13.58115869075784    
        9.29100000     2928.021293899941         14.00611813756453    
        9.29480000     3057.803577695737         15.60430445915748    
        9.29860000     3184.958890655353         15.58133073463267    
        9.30240000     3335.505191131258         17.32811165964823    
        9.30620000     3480.589963577252         17.14438537752345    
        9.31000000     3632.873861944125         16.15998676053993    
        9.31380000     3755.132244508109         16.28795309984562    
        9.31760000     3845.230832909650         15.22938446602775    
        9.32140000     3902.614939957122         15.29078165120734    
        9.32520000     3932.848672384658         15.38936476834783    
        9.32900000     3911.663365094098         15.40011234762837    
        9.33280000     3869.145160147795         15.07613652609573    
        9.33660000     3776.119256601714         14.79929614698256    
        9.34040000     3704.839165106577         15.30725491856953    
        9.34420000     3579.210173775922         15.86176616882722    
        9.34800000     3484.130494446375         14.91986749721295    
        9.35180000     3394.446905305881         13.53390172151765    
        9.35560000     3305.178270680799         14.73578869619620    
        9.35940000     3218.266680238672         12.93463715973295    
        9.36320000     3153.556696453343         12.71365784108434    
        9.36700000     3101.653154550123         12.40881376265667    
        9.37080000     3039.567723875354         12.26131991369918    
        9.37460000     2981.190349496746         11.91198935560947    
        9.37840000     2925.847782383415         12.05993080510266    
        9.38220000     2872.106767943558         11.59553806223692    
        9.38600000     2829.650811029018         11.49007719742783    
        9.38980000     2791.458985041076         11.45694393861631    
        9.39360000     2753.677477357253         11.25422460666873    
        9.39740000     2715.504561310381         11.03158759862687    
        9.40120000     2692.733950472275         10.87178178846876    
        9.40500000     2671.650362185562         10.92213959570810    
        9.40880000     2660.401441447100         10.85922656498402    
        9.41260000     2652.344547993774         10.84603818600311    
        9.41640000     2663.519225931164         10.92702640557124    
        9.42020000     2680.501849376513         10.93423602829148    
        9.42400000     2696.468291649255         10.98558664422156    
        9.42780000     2720.007503290640         11.03973540748811    
        9.43160000     2765.349591411727         11.38574169220204    
        9.43540000     2819.176821163286         11.60829265330412    
        9.43920000     2894.111432539723         12.86852262927377    
        9.44300000     2974.758899823628         13.27915456796015    
        9.44680000     3052.306319257807         14.32361964524184    
        9.45060000     3152.805167498491         14.73336060742377    
        9.45440000     3242.396066201939         14.95235540964777    
        9.45820000     3330.620688424302         13.29309757750389    
        9.46200000     3379.211521313826         13.39903630516473    
        9.46580000     3428.912616125176         13.70615712200655    
        9.46960000     3408.898470183492         13.65997575762783    
        9.47340000     3367.722857236713         13.37456832844471    
        9.47720000     3293.276469792989         14.69747442091343    
        9.48100000     3197.793740060720         15.34042031303832    
        9.48480000     3087.226382631919         14.89909995467396    
        9.48860000     2973.847181910963         14.74927866623864    
        9.49240000     2862.874941158951         14.62093270721020    
        9.49620000     2782.260244078912         11.96356647228555    
        9.50000000     2696.341874132469         11.57223642279060    
        9.50380000     2636.378245083992         10.80748787200888    
        9.50760000     2586.657474221070         10.57020072903576    
        9.51140000     2550.348191321413         10.39892704666037    
        9.51520000     2517.260284468581         10.28980706782945    
        9.51900000     2489.500422498372         10.23396229920970    
        9.52280000     2482.946226464658         10.19069791727178    
        9.52660000     2472.373248835554         10.09349639448167    
        9.53040000     2467.700146675139         10.17458036660108    
        9.53420000     2467.722962636865         10.18859733335983    
        9.53800000     2457.917717282969         10.19040418530230    
        9.54180000     2455.702457751531         10.09198286145724    
        9.54560000     2462.094608199019         10.15966865632928    
        9.54940000     2459.540560395719         10.08017447227646    
        9.55320000     2460.442169800935         10.14928859776823    
        9.55700000     2467.838928945911         10.03284403177539    
        9.56080000     2474.349522563832         10.18371568243070    
        9.56460000     2477.614995660454         10.31908311705505    
        9.56840000     2482.435347770269         10.14742776568046    
        9.57220000     2485.006625280926         10.22107632909345    
        9.57600000     2497.147704289832         10.31972590094444    
        9.57980000     2488.659345792937         10.16062343319002    
        9.58360000     2492.894171722362         10.19068702056401    
        9.58740000     2490.378669357453         10.22192636502051    
        9.59120000     2490.837048585326         10.22679869347578    
        9.59500000     2495.630387924421         10.27872227002021    
        9.59880000     2486.352737808525         10.10086630497979    
        9.60260000     2495.400055247628         10.25388942206893    
        9.60640000     2486.629236251684         10.29551139531562    
        9.61020000     2492.459022892901         10.22594609573251    
        9.61400000     2502.202481709590         10.26478812894545    
        9.61780000     2491.291981921258         10.28518741374205    
        9.62160000     2499.438257218321         10.31930457281831    
        9.62540000     2495.084884347007         10.26795463451054    
        9.62920000     2496.849940133593         10.29149552680829    
        9.63300000     2495.088158410590         10.16922413403711    
        9.63680000     2496.275855837575         10.21071696712620    
        9.64060000     2507.029784516601         10.25752218525553    
        9.64440000     2506.404191504095         10.29195072112776    
        9.64820000     2501.787801530535         10.28163837215689    
        9.65200000     2510.194695739404         10.29416828326040    
        9.65580000     2518.159963242603         10.31927838557574    
        9.65960000     2521.179751848917         10.41060277831416    
        9.66340000     2516.964398795511         10.40282701962148    
        9.66720000     2514.841230969291         10.33905985608586    
        9.67100000     2526.578873050034         10.32305981397433    
        9.67480000     2530.851082510683         10.36017924370105    
        9.67860000     2545.313128349720         10.34392023485424    
        9.68240000     2548.506292247179         10.47059470882473    
        9.68620000     2562.534216947895         10.48468627555006    
        9.69000000     2572.066669846641         10.53585823436245    
        9.69380000     2590.605393995161         10.61238356735485    
        9.69760000     2603.595276174855         10.52290508915565    
        9.70140000     2616.490349901567         10.62226662823737    
        9.70520000     2637.161898410223         10.74969888760776    
        9.70900000     2664.079636791357         10.84251485777404    
        9.71280000     2686.641273041434         10.95025560757291    
        9.71660000     2701.225474012353         11.07033403224088    
        9.72040000     2741.293164174990         11.18931279688329    
        9.72420000     2767.463928072898         11.29469984838047    
        9.72800000     2808.521267268631         11.40468577982552    
        9.73180000     2835.921145669086         11.39118310917892    
        9.73560000     2869.669179021522         11.63252476533384    
        9.73940000     2908.240674665120         11.67997734235487    
        9.74320000     2937.623610502713         11.76589817616797    
        9.74700000     2968.318725970120         11.98044951738939    
        9.75080000     2988.558573069422         12.09807576039397    
        9.75460000     2998.875969549875         12.04721092661276    
        9.75840000     3003.652229400629         12.02953038384289    
        9.76220000     2998.928679503035         12.03552672552587    
        9.76600000     2994.681370344911         12.14919773535977    
        9.76980000     2983.497166766792         12.04575638646959    
        9.77360000     2964.671507572107         11.90965341429170    
        9.77740000     2940.022147083017         11.79222151932444    
        9.78120000     2905.731657177367         11.79531447766775    
        9.78500000     2873.123860006874         11.60868670954794    
        9.78880000     2833.218666755628         11.51779642714998    
        9.79260000     2807.478939371507         11.39148473269776    
        9.79640000     2767.425222173962         11.21761510324700    
        9.80020000     2725.189257430391         11.00927822924454    
        9.80400000     2700.242874594625         10.98948939098362    
        9.80780000     2674.323238116353         10.94168352698310    
        9.81160000     2652.781494945546         10.80327692458068    
        9.81540000     2633.255288290227         10.70307996028057    
        9.81920000     2605.913298368354         10.70393327940786    
        9.82300000     2580.603440769840         10.56194902220379    
        9.82680000     2571.312526231291         10.45952000567475    
        9.83060000     2563.147996850984         10.52926510472009    
        9.83440000     2549.923807520598         10.49368901333823    
        9.83820000     2533.459184324777         10.52719081084366    
        9.84200000     2524.063295599777         10.42208696999088    
        9.84580000     2523.889794303027         10.36564888612125    
        9.84960000     2519.504975021371         10.25530454370089    
        9.85340000     2515.741456432562         10.35339770475084    
        9.85720000     2517.860806598447         10.30376193975733    
        9.86100000     2514.109779680218         10.30586552722964    
        9.86480000     2518.502105891014         10.42639273840344    
        9.86860000     2510.580507899754         10.32768236881192    
        9.87240000     2515.910899831849         10.33662072293476    
        9.87620000     2522.966031444585         10.43557623488762    
        9.88000000     2535.260866654318         10.35176000142637    
        9.88380000     2538.765334750146         10.40470677877538    
        9.88760000     2551.974481569380         10.43662014087785    
        9.89140000     2565.622165994605         10.50997690497908    
        9.89520000     2574.229088482651         10.59421364574312    
        9.89900000     2579.272373757643         10.53073715228139    
        9.90280000     2604.399643934126         10.60825998645321    
        9.90660000     2599.232878819556         10.67538014501065    
        9.91040000     2601.951594178379         10.62162977446098    
        9.91420000     2600.942131186712         10.64388120847083    
        9.91800000     2602.531646700991         10.64653489588171    
        9.92180000     2598.717649488741         10.63714104764224    
        9.92560000     2570.427408721197         10.53186418630701    
        9.92940000     2550.151641917090         10.50178855416287    
        9.93320000     2532.995461506032         10.33984173965326    
        9.93700000     2500.975138788254         10.24567937027272    
        9.94080000     2482.685279191693         10.20876878713591    
        9.94460000     2457.897279677099         10.13582909014606    
        9.94840000     2428.762627242556         10.04982745076046    
        9.95220000     2417.726022876741         9.942087859977150    
        9.95600000     2398.200669713568         9.880742219245912    
        9.95980000     2380.177586621680         9.922345119152240    
        9.96360000     2365.701184628640         9.857220398771782    
        9.96740000     2366.942146589301         9.766450940678689    
        9.97120000     2353.325070219752         9.719238074620243    
        9.97500000     2355.397791595444         9.725105919340761    
        9.97880000     2346.054689567417         9.668087530541857    
        9.98260000     2342.367158391332         9.743145881806216    
        9.98640000     2336.292090867231         9.744788872177338    
        9.99020000     2328.900843932188         9.673063185255506    
        9.99400000     2318.331407009181         9.620027836641031    
        9.99780000     2324.971118718934         9.531143875199595    
       10.00160000     2329.063462712330         9.565933595688032    
       10.00540000     2331.205851338283         9.669760585108712    
       10.00920000     2334.853926264019         9.704412457605516    
       10.01300000     2329.255346412093         9.691825178234353    
       10.01680000     2330.671521189480         9.721797958297117    
       10.02060000     2329.093000065324         9.697396483398871    
       10.02440000     2328.127844660751         9.739169931006204    
       10.02820000     2325.187962341580         9.676760142517471    
       10.03200000     2330.341412416725         9.532437385080819    
       10.03580000     2336.412888406631         9.642007850314744    
       10.03960000     2342.089774128311         9.746181557292422    
       10.04340000     2342.304486800606         9.700132150163961    
       10.04720000     2349.684294484372         9.739836126887049    
       10.05100000     2346.471969572217         10.01070957090360    
       10.05480000     2351.130164847531         11.25533242920377    
       10.05860000     2347.654948868859         11.12370826829131    
       10.06240000     2346.164808863367         11.17872064015569    
       10.06620000     2355.525174246633         11.37879691087689    
       10.07000000     2358.380498271295         11.25061012469718    
       10.07380000     2368.360709922681         11.19789532109052    
       10.07760000     2376.755187240287         11.29941958240875    
       10.08140000     2385.035911613713         11.42245799087932    
       10.08520000     2406.882476928764         11.51788166250802    
       10.08900000     2411.293290129284         11.58951288778643    
       10.09280000     2415.130296639718         11.48638863674068    
       10.09660000     2428.454349989559         11.47827708435587    
       10.10040000     2450.953637044010         11.61638282967971    
       10.10420000     2474.319667018888         11.74806720883317    
       10.10800000     2484.906137402589         11.88340665013090    
       10.11180000     2504.296435200662         11.87209311497820    
       10.11560000     2531.707205033939         11.93406704568447    
       10.11940000     2563.702643937265         12.14760635183925    
       10.12320000     2597.269591975385         12.22632866121994    
       10.12700000     2621.270878627476         12.24719921093076    
       10.13080000     2653.164186451321         12.47154967260227    
       10.13460000     2693.565231224420         12.67108608065955    
       10.13840000     2726.310835160687         12.94298002068227    
       10.14220000     2761.618642488101         12.99324006938335    
       10.14600000     2799.919737064523         13.11648977130023    
       10.14980000     2827.640952232843         13.10280313201668    
       10.15360000     2863.846741255449         13.38091844441010    
       10.15740000     2908.024422662073         13.49583992789048    
       10.16120000     2928.168735811615         13.62240004596640    
       10.16500000     2952.780067645908         13.86611930936328    
       10.16880000     2978.361921417675         13.85605772103326    
       10.17260000     3012.971193671568         13.96351198693656    
       10.17640000     3069.195376734762         14.29674088479631    
       10.18020000     3111.902047903951         14.34339049030515    
       10.18400000     3141.757399344769         14.51557139719635    
       10.18780000     3207.085497337048         15.15400427824478    
       10.19160000     3262.590769843363         15.03670974878695    
       10.19540000     3309.773068198178         15.26747060462169    
       10.19920000     3374.944899125971         15.43923207001174    
       10.20300000     3436.008753129653         15.65926058293542    
       10.20680000     3481.611036754387         15.90004490365815    
       10.21060000     3504.120430034610         15.95039441219704    
       10.21440000     3527.370000000547         16.06963227942535    
       10.21820000     3507.422765350847         15.90887601521414    
       10.22200000     3462.286936684683         15.82505193376924    
       10.22580000     3404.707593233431         15.59841205302612    
       10.22960000     3322.209938590313         15.22102482174314    
       10.23340000     3223.990011127149         17.03443422522738    
       10.23720000     3136.225418057418         15.72657762343217    
       10.24100000     3038.590376637420         16.16072519493734    
       10.24480000     2939.245541465497         13.98037594184590    
       10.24860000     2866.029622849677         11.99754022670146    
       10.25240000     2770.870882596099         11.50115093913962    
       10.25620000     2715.721318080300         10.95749829198947    
       10.26000000     2647.211046649809         10.82481539704482    
       10.26380000     2599.658135304637         10.66535818019815    
       10.26760000     2568.172311725200         10.50248336838387    
       10.27140000     2528.229118070979         10.32445369394582    
       10.27520000     2513.312431014779         10.29296603326894    
       10.27900000     2488.131640529885         10.17226961697977    
       10.28280000     2469.737222858254         10.18210031474218    
       10.28660000     2455.212253396473         10.06303598965101    
       10.29040000     2445.531137432856         10.06032121618723    
       10.29420000     2427.493109758311         10.00281285696759    
       10.29800000     2420.593713147498         9.858973585283268    
       10.30180000     2419.907763580778         9.847399138109308    
       10.30560000     2410.290637043596         9.896511308621639    
       10.30940000     2412.636014782833         9.978205725941102    
       10.31320000     2399.408462718361         9.945009903490952    
       10.31700000     2401.760156829211         9.926911972466657    
       10.32080000     2393.068213274578         9.865886221784034    
       10.32460000     2389.931567104306         9.921059288932501    
       10.32840000     2393.184603309580         9.910392058830858    
       10.33220000     2386.824192223003         9.729476869978210    
       10.33600000     2393.613443381501         9.852365884470844    
       10.33980000     2385.834853176113         9.878091882582902    
       10.34360000     2384.599743668527         9.849742575973446    
       10.34740000     2388.248724436031         9.864933884591963    
       10.35120000     2378.643289311989         9.880468714452185    
       10.35500000     2376.517666858033         11.31953969966754    
       10.35880000     2370.909830046768         11.22173873117837    
       10.36260000     2368.785604528876         11.26432467158002    
       10.36640000     2361.268146191615         11.31304366515662    
       10.37020000     2363.331445691175         11.27126541207324    
       10.37400000     2368.462156857686         11.19136310664278    
       10.37780000     2370.776321973457         11.31926769771160    
       10.38160000     2368.309227353654         11.29328204917560    
       10.38540000     2369.832770023265         11.29224951979753    
       10.38920000     2365.374592034920         11.31554654373961    
       10.39300000     2371.999186074194         11.31858799576026    
       10.39680000     2381.275565139747         11.31617433704062    
       10.40060000     2376.701436548933         11.25518710412265    
       10.40440000     2375.058784273504         11.28157232962040    
       10.40820000     2375.965705223052         11.35646821554812    
       10.41200000     2371.938364771411         11.24381740100079    
       10.41580000     2371.145170824362         11.26237926506973    
       10.41960000     2376.206365019682         11.35823019541031    
       10.42340000     2372.995254637749         11.30918840292873    
       10.42720000     2369.763719145910         11.25395347831477    
       10.43100000     2370.595961916155         11.32446463755850    
       10.43480000     2382.306991865338         11.42481128509259    
       10.43860000     2378.342471230515         11.42473709692073    
       10.44240000     2381.147487670246         11.37135595944008    
       10.44620000     2379.954390208808         11.35308003222813    
       10.45000000     2378.662927096258         11.32885551715408    
       10.45380000     2384.973438528187         11.42399343408223    
       10.45760000     2387.088413483772         11.35366290562816    
       10.46140000     2392.797853928839         11.36856358682610    
       10.46520000     2385.839799748625         11.47843473428281    
       10.46900000     2387.451124917844         11.48019761695591    
       10.47280000     2391.817039884874         11.40575553695657    
       10.47660000     2396.379239510542         11.51109093577010    
       10.48040000     2393.286074801802         11.48421152574333    
       10.48420000     2403.416326198272         11.43027233754496    
       10.48800000     2406.199119795370         11.46116762603078    
       10.49180000     2409.502662099908         11.53668169094154    
       10.49560000     2400.276209007377         11.44503504671908    
       10.49940000     2413.462584767285         11.45191105365595    
       10.50320000     2417.265127346675         11.53887439763274    
       10.50700000     2431.298242344257         11.66687923033244    
       10.51080000     2439.032944834502         11.59826460815031    
       10.51460000     2433.675189167890         11.54520115403268    
       10.51840000     2441.136679326598         11.48267257823864    
       10.52220000     2440.779040390953         11.64937666512576    
       10.52600000     2455.110517827165         11.65579018066279    
       10.52980000     2469.339189709578         11.74802875528672    
       10.53360000     2469.266144259888         11.76783539326379    
       10.53740000     2482.513860628965         11.74198007170432    
       10.54120000     2490.850351350781         11.79414056280347    
       10.54500000     2497.126084602470         10.56308549100057    
       10.54880000     2509.377183259474         10.20073347763882    
       10.55260000     2525.015157534956         10.26922802193740    
       10.55640000     2546.518796987631         10.34241852603279    
       10.56020000     2548.970165531565         10.38020560518702    
       10.56400000     2566.220314857410         10.55528222640619    
       10.56780000     2589.923944566496         10.59197707292760    
       10.57160000     2613.803223071309         10.62020201019049    
       10.57540000     2640.093043300019         10.74848617707064    
       10.57920000     2659.261670060872         10.83027437820044    
       10.58300000     2689.624238152805         10.93286463071910    
       10.58680000     2712.571059916441         11.02826616507251    
       10.59060000     2756.251934827732         11.09605210691330    
       10.59440000     2795.783945697379         11.25986357853444    
       10.59820000     2846.488502726009         11.35826780037836    
       10.60200000     2903.721345065312         11.59296116121791    
       10.60580000     2963.521558247300         11.84440586310352    
       10.60960000     3023.002538185518         12.10783493031421    
       10.61340000     3097.003229718803         12.30894194287858    
       10.61720000     3169.836968766673         12.60392230248989    
       10.62100000     3258.388763193611         12.88805600968039    
       10.62480000     3338.348974313009         13.72843329029224    
       10.62860000     3436.991162696897         13.65683943890746    
       10.63240000     3524.642551707867         13.77535852703081    
       10.63620000     3631.241890285357         14.27553640699534    
       10.64000000     3749.037592423802         17.15058126362418    
       10.64380000     3899.249209276785         17.90634724911874    
       10.64760000     4048.309174847251         21.43386249889337    
       10.65140000     4198.368441051436         21.75706350583680    
       10.65520000     4340.694937519624         20.95326683187505    
       10.65900000     4485.339452131811         23.39754047536106    
       10.66280000     4626.788682003804         21.59203683828383    
       10.66660000     4742.375942414561         21.02142976660553    
       10.67040000     4793.787123384805         21.18979315131486    
       10.67420000     4803.268377137367         21.00277471596260    
       10.67800000     4727.298734897307         21.08205649939553    
       10.68180000     4601.898793254546         25.87613808226985    
       10.68560000     4432.140303483253         26.29250747998728    
       10.68940000     4253.138332419057         27.99889493641431    
       10.69320000     4044.570510376096         27.94238858971436    
       10.69700000     3845.684357533111         26.49867042752648    
       10.70080000     3659.013133072106         24.90812380165619    
       10.70460000     3492.957758974390         23.36707731311478    
       10.70840000     3338.141871083345         20.83001119402639    
       10.71220000     3204.300360369696         20.07281606927486    
       10.71600000     3093.062024468960         16.21341774046014    
       10.71980000     3002.002921551750         17.85595274155214    
       10.72360000     2920.693704875558         13.64946623715180    
       10.72740000     2862.631668680190         15.33112293941019    
       10.73120000     2799.780761929901         13.04215886920882    
       10.73500000     2758.816004372668         12.87650266807841    
       10.73880000     2714.456958985297         12.66462393964341    
       10.74260000     2686.385007745076         12.56574031713067    
       10.74640000     2662.066461974489         12.44277193522402    
       10.75020000     2635.447786526511         12.32730561860014    
       10.75400000     2615.650951569096         12.24704491205895    
       10.75780000     2605.243173555546         12.18585113346212    
       10.76160000     2590.500321187401         12.12654801004082    
       10.76540000     2589.546209324320         12.16480448050934    
       10.76920000     2579.327700105848         12.19041516940659    
       10.77300000     2575.491189264907         12.18463265323031    
       10.77680000     2579.495873294569         12.15881129981689    
       10.78060000     2597.242080504198         12.19948540439763    
       10.78440000     2609.915716158273         12.19664963505094    
       10.78820000     2624.983375314110         12.22617479934809    
       10.79200000     2644.643848655374         12.45174763599549    
       10.79580000     2663.872390131610         12.50577975124609    
       10.79960000     2696.618260322757         12.67752456075856    
       10.80340000     2721.924074078301         12.79802875084210    
       10.80720000     2748.919351191547         12.93084736804510    
       10.81100000     2770.191605360118         12.95748488099371    
       10.81480000     2785.344668219122         12.96779581488471    
       10.81860000     2795.065048467514         12.97667108868024    
       10.82240000     2806.068508957264         13.11645090441383    
       10.82620000     2803.845099323562         13.06884710776143    
       10.83000000     2793.690394984764         13.10658534006983    
       10.83380000     2782.129824101192         13.08421960890748    
       10.83760000     2768.663094691242         12.98001845146582    
       10.84140000     2751.457720544803         12.86411240363745    
       10.84520000     2729.445928909557         11.29448190548174    
       10.84900000     2714.442148004838         10.98634281535571    
       10.85280000     2698.060278091780         10.90902076086046    
       10.85660000     2678.425360910026         10.77320723040330    
       10.86040000     2664.618192512492         10.74564165030674    
       10.86420000     2649.998646505448         10.78518683377033    
       10.86800000     2651.415013866441         10.77934233686732    
       10.87180000     2630.614462391084         10.70684863308350    
       10.87560000     2632.915046205864         10.75765150104473    
       10.87940000     2631.300251411560         10.62788917306113    
       10.88320000     2628.599597900659         10.71018683343762    
       10.88700000     2611.695531396238         10.69285233411284    
       10.89080000     2618.428152579766         10.70159139478438    
       10.89460000     2610.564999301362         10.62242015565595    
       10.89840000     2604.031786641343         10.53919375381037    
       10.90220000     2599.028684215401         10.50968149043611    
       10.90600000     2596.584119363232         10.61854959753059    
       10.90980000     2575.783240965030         10.47370171880184    
       10.91360000     2567.375753617155         10.45944850278422    
       10.91740000     2561.646190711247         10.44466335090903    
       10.92120000     2556.654612806798         10.39069096970083    
       10.92500000     2544.316188398916         10.39755983689653    
       10.92880000     2540.957508445358         10.43564994992921    
       10.93260000     2537.635999620245         10.33504660560007    
       10.93640000     2526.541392215021         10.25621023376579    
       10.94020000     2523.847229544316         10.33463424416748    
       10.94400000     2517.198312537743         10.28682493155687    
       10.94780000     2516.081036283359         10.27407274150760    
       10.95160000     2514.960995686799         10.58252393134140    
       10.95540000     2506.432471291699         11.84774331778026    
       10.95920000     2513.544885833999         11.75188334138114    
       10.96300000     2514.930435418501         11.91609146853797    
       10.96680000     2516.652290017688         11.87324487778722    
       10.97060000     2533.042649472002         11.92906362547272    
       10.97440000     2530.279456233172         11.91210735270448    
       10.97820000     2552.056226782308         11.94094313155611    
       10.98200000     2554.745714596623         11.95068693614980    
       10.98580000     2557.143745935274         11.92929815502692    
       10.98960000     2589.807197119957         12.22407202678393    
       10.99340000     2601.828133214993         12.33855525817443    
       10.99720000     2613.677652820444         12.33366541261856    
       11.00100000     2633.196242418250         12.32803856189356    
       11.00480000     2652.951427174071         12.39704899044735    
       11.00860000     2674.084508663708         12.47344302165886    
       11.01240000     2719.596643408653         12.63390572976406    
       11.01620000     2744.338692931392         12.74238322630930    
       11.02000000     2775.506155505717         12.91234070407780    
       11.02380000     2807.978997724837         13.09406692416406    
       11.02760000     2848.822585838861         13.20613697667801    
       11.03140000     2883.116335149361         13.39941112084336    
       11.03520000     2928.884319064210         13.53336121777598    
       11.03900000     2960.263601607319         13.61350894259393    
       11.04280000     3006.983449568833         13.84590785770244    
       11.04660000     3053.376846040081         14.00548246215489    
       11.05040000     3104.357301686262         14.32033386982294    
       11.05420000     3139.283794383462         14.39312460576476    
       11.05800000     3167.108009774966         14.39276173865379    
       11.06180000     3192.202626624478         14.48212504160816    
       11.06560000     3206.338869584423         14.58633857221540    
       11.06940000     3203.660761533528         14.65105729055679    
       11.07320000     3188.077519762083         14.62765339066789    
       11.07700000     3161.494632270785         14.55202941266722    
       11.08080000     3117.712097818015         14.29940180416817    
       11.08460000     3073.844869132754         14.09358462800356    
       11.08840000     3021.017561601382         14.04034027311178    
       11.09220000     2963.169731022769         13.78259188099701    
       11.09600000     2910.793257350934         13.47746134530341    
       11.09980000     2870.209649876372         13.25916633281176    
       11.10360000     2833.023842116252         13.20586754108393    
       11.10740000     2798.555913547184         13.10444494740558    
       11.11120000     2769.785360498796         12.94790625441898    
       11.11500000     2750.910628986082         12.84765633947423    
       11.11880000     2732.606903284996         12.75096935672666    
       11.12260000     2725.910711293141         12.83901282188233    
       11.12640000     2719.481372225359         12.71097539193270    
       11.13020000     2711.972347816520         12.62391040388521    
       11.13400000     2719.862898851939         12.78287404497283    
       11.13780000     2736.109401086568         12.82203938467026    
       11.14160000     2738.721599338041         12.75985757988372    
       11.14540000     2754.828222770254         11.25773778449124    
       11.14920000     2768.614645699199         11.12329723289142    
       11.15300000     2790.247604038858         11.22811731297622    
       11.15680000     2809.615925675189         11.25839757153087    
       11.16060000     2839.870609557807         11.31879775370059    
       11.16440000     2868.747630253162         11.52131105611094    
       11.16820000     2915.409344316573         11.74513092316495    
       11.17200000     2949.715693989795         11.85369843099081    
       11.17580000     2994.956028707287         12.11283070415673    
       11.17960000     3013.141358995087         12.01059413281779    
       11.18340000     3056.951761995875         12.20581472572561    
       11.18720000     3067.961958569590         12.24432683728797    
       11.19100000     3094.088023838813         12.40684994196588    
       11.19480000     3086.504084399477         12.36581241779254    
       11.19860000     3075.330973961591         12.20448298590325    
       11.20240000     3036.204783960390         12.08513851261365    
       11.20620000     3026.080371892022         12.01109399278301    
       11.21000000     2969.272224845390         11.82453756109368    
       11.21380000     2926.537971035650         11.71216740976857    
       11.21760000     2879.062061436444         11.54138476868440    
       11.22140000     2836.100969769299         11.29093255588285    
       11.22520000     2786.489950163455         11.27563060267202    
       11.22900000     2764.441144071372         11.17920544887571    
       11.23280000     2718.467013853077         11.03556216125857    
       11.23660000     2706.613690474544         10.85219897810786    
       11.24040000     2676.859568606172         10.84049665044168    
       11.24420000     2650.067829558976         10.70405244835001    
       11.24800000     2634.438866913585         10.70472369605563    
       11.25180000     2614.401981594460         10.61331035893317    
       11.25560000     2594.143760333347         10.54640194035185    
       11.25940000     2565.417970383380         10.35094926818196    
       11.26320000     2550.597875773145         10.40102890378248    
       11.26700000     2534.050583925233         10.29070064920684    
       11.27080000     2512.135731235374         10.24481259393004    
       11.27460000     2503.289881921107         10.22977774538319    
       11.27840000     2480.737600216690         10.12064558701276    
       11.28220000     2461.892641466493         10.06985655660524    
       11.28600000     2454.057776806491         10.01435756925897    
       11.28980000     2441.007081968046         10.05884837523650    
       11.29360000     2429.467509581108         10.01194057846998    
       11.29740000     2419.673774400387         9.959729239363400    
       11.30120000     2420.083969450305         9.913872144479960    
       11.30500000     2409.079617900400         9.889452954702318    
       11.30880000     2398.146644198926         9.831578136849922    
       11.31260000     2392.475729456901         9.797342925068129    
       11.31640000     2394.409910806643         9.816934650600306    
       11.32020000     2396.043926336281         9.829989894292249    
       11.32400000     2386.747940121605         9.832293912243840    
       11.32780000     2381.859163955117         9.799477207029568    
       11.33160000     2370.240484904834         9.756033757908016    
       11.33540000     2374.363446334055         9.732556552283455    
       11.33920000     2372.059039713869         9.710221859865257    
       11.34300000     2374.540312062717         9.796474659169814    
       11.34680000     2364.036121301857         9.704415079401866    
       11.35060000     2363.333218307799         9.751258259755140    
       11.35440000     2362.169965124692         9.724956417371601    
       11.35820000     2365.217002497359         9.677999653603804    
       11.36200000     2359.521085821940         9.661017619130906    
       11.36580000     2352.153031768778         9.688848339103494    
       11.36960000     2357.364470733812         9.717326372395602    
       11.37340000     2352.286478398303         9.713280450430021    
       11.37720000     2346.499432700227         9.700075766010123    
       11.38100000     2340.207983971889         9.617848362543949    
       11.38480000     2341.699883747316         9.635263884596091    
       11.38860000     2337.876892370751         9.633736378407207    
       11.39240000     2335.983790310222         9.694344359230703    
       11.39620000     2335.619524807531         9.628713560329475    
       11.40000000     2339.366911896810         9.614833804953527    
       11.40380000     2338.937338296631         9.665819262652752    
       11.40760000     2339.589005206263         9.682677730475440    
       11.41140000     2343.671887343009         9.652163347307498    
       11.41520000     2355.835061296021         9.717945516193947    
       11.41900000     2361.093988177499         9.736817098441266    
       11.42280000     2370.513912714271         9.811487676007783    
       11.42660000     2378.958910331824         9.779163102252504    
       11.43040000     2381.304421225409         9.769798501886351    
       11.43420000     2385.153688605525         9.852081861508704    
       11.43800000     2393.331700805773         9.872374613139685    
       11.44180000     2398.449641477202         9.836061139972484    
       11.44560000     2408.479940310337         9.958174459615369    
       11.44940000     2409.231908159607         9.931917751581555    
       11.45320000     2412.949352131410         9.925507752155836    
       11.45700000     2394.444300431399         9.797363637756295    
       11.46080000     2392.394332183312         9.745851978056923    
       11.46460000     2376.295674603291         9.765822078110874    
       11.46840000     2372.212708048202         9.812427754362233    
       11.47220000     2365.856489281001         9.789598470627674    
       11.47600000     2340.724675864551         9.743442150467486    
       11.47980000     2320.306812533716         9.529138697677110    
       11.48360000     2317.266721590609         9.594108466434504    
       11.48740000     2292.617471117565         9.552759451804096    
       11.49120000     2274.385507813038         9.469018170862052    
       11.49500000     2260.778687978114         9.417871612740923    
       11.49880000     2252.461414644924         9.312132774060615    
       11.50260000     2233.768654395501         9.286779022467719    
       11.50640000     2230.067723449649         9.287911670960787    
       11.51020000     2219.702481483344         9.202336537659253    
       11.51400000     2213.886023887112         9.191075840043295    
       11.51780000     2204.984876242081         9.164625309738231    
       11.52160000     2196.591627230462         9.049932907089644    
       11.52540000     2186.059452471769         9.102431612473568    
       11.52920000     2194.823211401220         9.156019295335920    
       11.53300000     2180.064456347623         9.136934434191296    
       11.53680000     2176.029025043958         8.963832956186723    
       11.54060000     2175.595267646685         9.083167850575681    
       11.54440000     2166.619497636102         9.002338946987418    
       11.54820000     2167.785027334491         9.056518980877296    
       11.55200000     2162.127266958907         8.982524361566549    
       11.55580000     2169.021209009780         9.023761749114740    
       11.55960000     2162.894065515593         8.933018847109489    
       11.56340000     2145.696228516987         8.952749446819780    
       11.56720000     2162.171819225375         8.936832394798003    
       11.57100000     2152.874151206779         8.929998074342134    
       11.57480000     2155.555774283548         9.020229709404587    
       11.57860000     2148.728405059800         8.990627090608379    
       11.58240000     2147.011409786236         9.010584688384290    
       11.58620000     2151.875161556387         8.936667303018009    
       11.59000000     2150.122544081328         9.020016411707701    
       11.59380000     2139.091571353476         8.954564355729755    
       11.59760000     2139.047779061698         8.964634239358896    
       11.60140000     2137.654922748749         8.979441278051892    
       11.60520000     2142.200144434854         8.952221771256648    
       11.60900000     2132.479540532293         8.919976349905777    
       11.61280000     2140.186367805692         8.926160482090284    
       11.61660000     2131.078448206385         8.888076444327078    
       11.62040000     2125.206588684776         8.903170356615663    
       11.62420000     2123.702099669551         8.928663811625762    
       11.62800000     2133.626698360923         8.916775321518465    
       11.63180000     2129.951353223285         8.923406881612468    
       11.63560000     2135.199272025456         8.923686051384596    
       11.63940000     2119.807115726054         8.818064071389822    
       11.64320000     2123.580043206767         8.911656474798187    
       11.64700000     2121.986140207150         8.826595720483388    
       11.65080000     2125.257431970608         8.909772480724325    
       11.65460000     2121.176255082642         8.844610693336831    
       11.65840000     2121.447304158157         8.805771256507288    
       11.66220000     2111.930747465032         8.797287900789355    
       11.66600000     2120.728734533651         8.858842101745042    
       11.66980000     2119.816348916584         8.854861308889410    
       11.67360000     2110.602999495597         8.840944080596021    
       11.67740000     2112.680075528164         8.875693335033635    
       11.68120000     2107.310480271693         8.804939870056163    
       11.68500000     2112.185997761414         8.835012693641879    
       11.68880000     2114.962324504632         8.879228941316427    
       11.69260000     2111.707661732462         8.878141157335891    
       11.69640000     2106.184478775752         8.838744635483172    
       11.70020000     2109.683496854917         8.831441726741611    
       11.70400000     2106.896611844926         8.824101112040214    
       11.70780000     2102.036813742008         8.805972336797248    
       11.71160000     2115.130119119668         8.845198567214402    
       11.71540000     2110.034984847040         8.852298300403353    
       11.71920000     2100.120596595459         8.826488608697838    
       11.72300000     2097.356337847409         8.838469799492067    
       11.72680000     2103.312132487019         8.780791897869397    
       11.73060000     2098.288592358720         8.774934580350905    
       11.73440000     2100.445505006321         8.785039176825320    
       11.73820000     2104.094926044823         8.807495850830374    
       11.74200000     2100.773263727155         8.786954195383954    
       11.74580000     2101.309193138358         8.855779440925351    
       11.74960000     2099.704713040118         8.863365337809890    
       11.75340000     2097.477087033267         8.811014620248912    
       11.75720000     2095.866028719880         8.758039374989279    
       11.76100000     2097.406449538993         8.750458169939064    
       11.76480000     2095.832985492031         8.765978643520342    
       11.76860000     2095.571660968132         8.810204037524583    
       11.77240000     2096.758510921616         8.853044675901005    
       11.77620000     2095.483991952079         8.894527202197921    
       11.78000000     2094.808304368020         8.803521578701254    
       11.78380000     2099.314896047468         8.827421458431735    
       11.78760000     2091.325471346704         8.801784024079582    
       11.79140000     2098.716023529973         8.857902759899794    
       11.79520000     2093.756400003708         8.807496834464182    
       11.79900000     2095.350197395790         8.760718184728191    
       11.80280000     2099.527388304225         8.806300264947962    
       11.80660000     2101.673516850478         8.810943344303206    
       11.81040000     2098.348325320261         8.777329064162197    
       11.81420000     2099.434763442362         8.821015297642836    
       11.81800000     2106.396722047011         8.841069243106661    
       11.82180000     2102.333924058928         8.743534641026761    
       11.82560000     2114.033228464744         8.871521585097520    
       11.82940000     2110.907034961867         8.808307349549416    
       11.83320000     2118.953597999131         8.859927777575495    
       11.83700000     2120.673777086201         8.773922330398133    
       11.84080000     2125.912952912859         8.927999945025872    
       11.84460000     2117.823148017352         8.840284081794746    
       11.84840000     2117.585604500890         8.854840911521322    
       11.85220000     2120.643534425631         8.792483246299104    
       11.85600000     2118.361665630499         8.857783375406438    
       11.85980000     2124.285080428275         8.866218870178797    
       11.86360000     2122.450808263776         8.900427019176741    
       11.86740000     2123.804859861041         8.783443446264942    
       11.87120000     2126.166620859040         8.824187034177601    
       11.87500000     2119.654741794358         8.898662149984519    
       11.87880000     2127.748562625279         8.961359971526113    
       11.88260000     2127.304323924433         8.969462624664652    
       11.88640000     2125.491539687273         8.836918693381316    
       11.89020000     2131.255097169778         8.889472312091236    
       11.89400000     2129.709605223462         8.911976397582098    
       11.89780000     2133.224509891308         8.918170724901223    
       11.90160000     2129.277400357573         8.962890812071677    
       11.90540000     2134.794960556418         8.945208957266173    
       11.90920000     2131.725254745996         8.933365364421034    
       11.91300000     2146.510159832164         8.948803169127107    
       11.91680000     2150.713469724535         8.946983230964275    
       11.92060000     2148.205697306395         8.952086532414256    
       11.92440000     2147.009401096622         9.034550102052862    
       11.92820000     2151.072242617185         8.992371236201771    
       11.93200000     2152.696814141676         8.980571863393532    
       11.93580000     2162.612411750175         9.050038445261503    
       11.93960000     2174.755648190250         9.073057212426225    
       11.94340000     2180.888367706741         9.123696210514451    
       11.94720000     2183.473746755195         9.018249744212618    
       11.95100000     2195.869028697571         9.151419673609137    
       11.95480000     2200.395114457597         9.186411942049091    
       11.95860000     2202.476352896591         9.142585809774582    
       11.96240000     2207.254573095252         9.172265912925946    
       11.96620000     2209.580003747117         9.231659402827352    
       11.97000000     2209.543126044875         9.210444844442771    
       11.97380000     2212.853667103957         9.197862490127200    
       11.97760000     2215.057433604530         9.247817243162419    
       11.98140000     2216.144796364440         9.272025173027382    
       11.98520000     2212.822547958026         9.261504196699859    
       11.98900000     2209.258098752730         9.250440199276531    
       11.99280000     2198.141975266215         9.196541964002336    
       11.99660000     2196.171674721104         9.137759700354282    
       12.00040000     2186.424281023645         9.096900639686849    
       12.00420000     2185.584018772412         9.130335151705079    
       12.00800000     2181.169225844071         9.094222035986210    
       12.01180000     2184.575134434703         9.069724773474976    
       12.01560000     2178.541360536292         9.109079315875642    
       12.01940000     2167.223893096215         9.081055058609358    
       12.02320000     2169.434423714927         9.069839514548182    
       12.02700000     2164.183228937337         9.002866519237433    
       12.03080000     2160.544998526123         8.983363354417941    
       12.03460000     2164.402586346327         9.029683902931682    
       12.03840000     2162.180557527672         9.031594989133852    
       12.04220000     2165.956187001427         9.057311363278354    
       12.04600000     2162.733428623930         9.085955121612438    
       12.04980000     2153.603961017882         9.028442984839016    
       12.05360000     2146.899299204245         8.987522731629443    
       12.05740000     2147.295343537502         8.968357737611214    
       12.06120000     2143.463902992268         8.972050085118100    
       12.06500000     2146.443080926928         9.006485768724399    
       12.06880000     2145.974571487200         9.005001420273178    
       12.07260000     2144.045759974885         8.999420982551580    
       12.07640000     2145.343450007107         9.037003646928554    
       12.08020000     2161.093562690786         9.085997242500421    
       12.08400000     2157.394650263720         9.024508138785238    
       12.08780000     2150.475193644141         8.986420171501321    
       12.09160000     2151.384091417971         9.005308012910056    
       12.09540000     2155.412048796696         9.003640128948062    
       12.09920000     2166.274110701179         9.048358831341202    
       12.10300000     2162.458453895839         9.047940687805450    
       12.10680000     2171.765867895807         9.069237117612905    
       12.11060000     2181.108903746148         9.104447214072021    
       12.11440000     2182.586086593984         9.069154128126339    
       12.11820000     2181.711026763543         9.057641752571874    
       12.12200000     2182.416541740296         9.039078309977661    
       12.12580000     2194.558121095186         9.200888065386572    
       12.12960000     2209.953147578458         9.154858235092417    
       12.13340000     2211.106140635047         9.169225107081893    
       12.13720000     2219.966682595402         9.112060811287698    
       12.14100000     2232.380880205862         9.330126634457331    
       12.14480000     2245.293622812315         9.302007227227293    
       12.14860000     2253.106069333940         9.367610362846717    
       12.15240000     2267.825562841021         9.340497262017733    
       12.15620000     2286.286128367964         9.443191161158742    
       12.16000000     2304.072496002637         9.504465156565740    
       12.16380000     2330.651514750161         9.631214502359144    
       12.16760000     2355.813109684339         9.588418523105711    
       12.17140000     2377.972886449618         9.723992813979265    
       12.17520000     2397.043151136339         9.847073036662001    
       12.17900000     2427.954230119046         10.02771129744385    
       12.18280000     2463.990797673372         10.17421516045011    
       12.18660000     2493.776218812697         10.12485251919984    
       12.19040000     2524.790948117753         10.30259539291413    
       12.19420000     2558.543134981322         10.44497247657250    
       12.19800000     2601.050434037426         10.62901407658585    
       12.20180000     2628.869295368677         10.76228807542032    
       12.20560000     2664.345938428087         10.80640107687925    
       12.20940000     2695.684576862153         10.99872814704987    
       12.21320000     2738.828890827481         11.09248455581331    
       12.21700000     2773.808322568266         11.14963210068828    
       12.22080000     2808.832190108374         11.33483480559505    
       12.22460000     2850.833141410740         11.48909841688594    
       12.22840000     2881.664281807713         11.59513786958719    
       12.23220000     2928.783250226943         11.73297572944930    
       12.23600000     2988.131130873131         11.99453836647778    
       12.23980000     3022.186510851179         12.08676854004446    
       12.24360000     3065.802155208643         12.33736432174988    
       12.24740000     3092.159541750482         12.25302687661021    
       12.25120000     3112.037724866998         12.38302863061526    
       12.25500000     3118.681173996527         12.42642851732414    
       12.25880000     3124.868199317026         12.42855776338728    
       12.26260000     3109.795923589194         12.38259282573655    
       12.26640000     3096.345796956617         12.43020730017621    
       12.27020000     3067.848810741676         12.26169423378757    
       12.27400000     3024.036089317170         12.11229134204120    
       12.27780000     2974.389370287561         11.94026052807911    
       12.28160000     2931.307474856872         11.81987516219567    
       12.28540000     2897.008684778955         11.75038767520070    
       12.28920000     2861.036087339894         11.55787633427151    
       12.29300000     2810.631350194789         11.34662102699081    
       12.29680000     2788.774953892072         11.21707250343424    
       12.30060000     2758.977374080227         11.16098816060061    
       12.30440000     2733.467825537359         11.02883776218954    
       12.30820000     2718.285469192926         11.00340968117939    
       12.31200000     2709.466556879923         10.86312394782538    
       12.31580000     2706.409506222186         10.98274037459618    
       12.31960000     2704.677458767795         11.05704798788055    
       12.32340000     2702.487681104986         10.93912185332181    
       12.32720000     2717.687860190066         11.01844038850788    
       12.33100000     2714.978580063188         10.96771386574806    
       12.33480000     2723.574993367400         10.98425768011045    
       12.33860000     2730.148725005495         11.05536910926770    
       12.34240000     2737.803555010464         11.16192627052127    
       12.34620000     2742.615791514961         11.18386355417725    
       12.35000000     2747.989946280879         11.23112296713650    
       12.35380000     2743.832179693712         11.16120919357244    
       12.35760000     2716.836328340588         10.97516922393376    
       12.36140000     2701.110666524543         10.97655912253294    
       12.36520000     2668.180924380133         10.86764128719104    
       12.36900000     2619.197512344871         10.72569557043983    
       12.37280000     2574.215973990583         10.53193852029023    
       12.37660000     2526.740958567314         10.37695982733272    
       12.38040000     2469.849703717648         11.10235648999565    
       12.38420000     2405.073339851813         10.86420511698689    
       12.38800000     2354.247588587538         9.749414206319003    
       12.39180000     2308.843566986799         9.555255564752869    
       12.39560000     2266.911378869940         9.424758702740379    
       12.39940000     2230.363723512214         9.308947363303718    
       12.40320000     2189.213365076711         9.145705240105489    
       12.40700000     2160.862753500885         9.108751287649344    
       12.41080000     2134.291596627048         8.969629554512442    
       12.41460000     2106.137749101657         8.815277158622305    
       12.41840000     2091.383477003028         8.784436257620921    
       12.42220000     2077.628236839556         8.736460807832701    
       12.42600000     2058.033245318691         8.679780752484515    
       12.42980000     2051.026656712697         8.612416507545948    
       12.43360000     2039.074075520298         8.595615388181818    
       12.43740000     2020.624923764220         8.522097576541345    
       12.44120000     2018.097402955764         8.544392040584755    
       12.44500000     2016.367666339907         8.541601069237496    
       12.44880000     2007.997063832224         8.491219053419393    
       12.45260000     2002.011634030787         8.412229913994450    
       12.45640000     1988.302504985025         8.415740639226950    
       12.46020000     1980.092177823746         8.389534775893701    
       12.46400000     1973.875782969141         8.405314895454948    
       12.46780000     1964.536743338173         8.278670953922031    
       12.47160000     1958.829440880760         8.254741023036594    
       12.47540000     1964.352369622019         8.324351819111849    
       12.47920000     1963.219763808392         8.328961035436075    
       12.48300000     1963.014269826562         8.350748944593146    
       12.48680000     1957.610105170244         8.245510117192897    
       12.49060000     1950.555882403712         8.285028260313201    
       12.49440000     1944.041186069941         8.301644364407274    
       12.49820000     1955.606863642713         8.288016861086705    
       12.50200000     1941.102738076484         8.297569556365206    
       12.50580000     1941.045810504446         8.252230086435146    
       12.50960000     1928.084840328741         8.243118001259420    
       12.51340000     1941.138026868695         8.245940167268103    
       12.51720000     1934.614735027697         8.171263075987964    
       12.52100000     1938.876184598014         8.253029841841578    
       12.52480000     1931.458062913395         8.232332946817564    
       12.52860000     1937.659447549270         8.194447130145702    
       12.53240000     1933.115262248526         8.243897647222788    
       12.53620000     1942.866028468643         8.292753937270710    
       12.54000000     1938.405932179916         8.261019606616930    
       12.54380000     1937.122841050801         8.235380891562023    
       12.54760000     1940.161753617698         8.185890451322662    
       12.55140000     1933.365230527459         8.206821449735539    
       12.55520000     1932.700782849549         8.205553543263756    
       12.55900000     1937.311939218071         8.216233341065328    
       12.56280000     1934.892600967842         8.222281884397791    
       12.56660000     1948.565999192393         8.322148764102604    
       12.57040000     1948.791970469681         8.293962035082650    
       12.57420000     1950.413223460920         8.302593724868851    
       12.57800000     1953.194212776308         8.337158305460617    
       12.58180000     1963.054416983027         8.423662126595229    
       12.58560000     1976.031011208657         8.468478888171381    
       12.58940000     1987.983242195678         8.428868145644024    
       12.59320000     1988.716287249116         8.401264440756520    
       12.59700000     2011.429566175619         8.481101525653427    
       12.60080000     2022.009149052313         8.593380161632904    
       12.60460000     2047.610926608254         8.622349701895477    
       12.60840000     2057.336806590726         8.662948029683008    
       12.61220000     2066.969322782470         8.640919369501820    
       12.61600000     2085.006828229278         8.808680881812727    
       12.61980000     2097.555146320393         8.893993205634439    
       12.62360000     2104.305560532222         8.816139329000480    
       12.62740000     2120.604840879913         8.923563643682925    
       12.63120000     2121.927094641150         8.889248730810978    
       12.63500000     2116.888269625624         8.854584309079611    
       12.63880000     2112.131604960525         8.879281890351997    
       12.64260000     2113.347191541484         8.958241241242076    
       12.64640000     2104.374764798746         8.855840307016519    
       12.65020000     2094.024293447776         8.874807756659818    
       12.65400000     2076.484565179096         8.749872951365296    
       12.65780000     2077.382245247224         8.729975457025477    
       12.66160000     2068.015539574495         8.730241378485200    
       12.66540000     2065.569153649983         8.719069379190884    
       12.66920000     2057.711344170429         8.644837136171892    
       12.67300000     2053.114465902690         8.662753581958381    
       12.67680000     2052.144456500353         8.678119919652561    
       12.68060000     2034.565484749458         8.641894434486144    
       12.68440000     2028.420970723187         8.611055864451755    
       12.68820000     2025.147867575889         8.579307794954765    
       12.69200000     2034.940006038510         8.577958685378588    
       12.69580000     2035.684377850079         8.612859928502024    
       12.69960000     2026.150181922774         8.607452339474692    
       12.70340000     2030.809837480276         8.601731658084871    
       12.70720000     2026.752589263043         8.592974939312640    
       12.71100000     2026.600731141302         8.570427123147681    
       12.71480000     2028.463296848429         8.557861856592556    
       12.71860000     2029.531943134331         8.570237844741809    
       12.72240000     2023.634000415565         8.607375518932029    
       12.72620000     2030.608672118537         8.578213115331810    
       12.73000000     2034.376278672905         8.547909060047481    
       12.73380000     2041.845299895656         8.593495638915936    
       12.73760000     2031.435824566927         8.599731903274066    
       12.74140000     2027.263388357606         8.585598310161256    
       12.74520000     2021.307896904054         8.591006439939310    
       12.74900000     2018.723012436289         8.503994199404554    
       12.75280000     2020.371862599578         8.481156030576761    
       12.75660000     2013.539809858303         8.491221697112055    
       12.76040000     2006.909966328486         8.468691261471939    
       12.76420000     2005.617804852483         8.542044737920531    
       12.76800000     2008.656293852498         8.464201549951818    
       12.77180000     2005.656903910404         8.477758229054059    
       12.77560000     2003.076508913632         8.465779889266054    
       12.77940000     2010.161157695069         8.473050203761852    
       12.78320000     2017.265802506277         8.513953712064879    
       12.78700000     2017.803377008826         8.488701171662376    
       12.79080000     2031.582463678450         8.576745533635323    
       12.79460000     2037.134241067573         8.609912367207949    
       12.79840000     2049.893491700037         8.606268801914654    
       12.80220000     2057.071674672791         8.683251556517590    
       12.80600000     2070.457222922606         8.727112194322322    
       12.80980000     2074.334420688566         8.760218721341747    
       12.81360000     2103.224953307698         8.836677368397895    
       12.81740000     2116.361702180909         8.838887918266288    
       12.82120000     2119.944369184213         8.867798049788350    
       12.82500000     2153.076550828181         9.006561998365038    
       12.82880000     2176.108330393004         9.085198693351051    
       12.83260000     2199.890962170040         9.166535155910360    
       12.83640000     2223.148897581082         9.302033342395353    
       12.84020000     2255.794188471088         9.377673971943212    
       12.84400000     2271.987909912955         9.377450105795146    
       12.84780000     2297.409988645815         9.430004890181818    
       12.85160000     2326.932817091131         9.586610056210134    
       12.85540000     2361.932679412194         9.780276512080999    
       12.85920000     2387.794437369408         9.841860054489684    
       12.86300000     2408.972546189603         9.949424042602372    
       12.86680000     2435.506855537441         10.09030589067658    
       12.87060000     2466.127428129874         10.14522400939294    
       12.87440000     2489.473099900913         10.26745759000557    
       12.87820000     2506.256571656402         10.31843868095569    
       12.88200000     2522.517577976633         10.45108187238632    
       12.88580000     2536.888212095332         10.50070755994931    
       12.88960000     2564.267630441501         10.46369348116839    
       12.89340000     2585.011114260844         10.58415241418863    
       12.89720000     2617.319942840517         10.64668168263864    
       12.90100000     2647.772481684610         10.84234165154031    
       12.90480000     2680.511594615093         10.86072512220521    
       12.90860000     2719.212231595807         10.97055262506145    
       12.91240000     2753.825496763536         11.08394161157201    
       12.91620000     2798.623981292931         11.42924568325448    
       12.92000000     2849.521139460024         11.61284857592267    
       12.92380000     2888.470810287537         11.62664542388577    
       12.92760000     2944.001584388026         11.90498635616381    
       12.93140000     2996.918158785509         12.04463156923765    
       12.93520000     3028.103030843322         12.13555989797232    
       12.93900000     3057.621788368006         12.31969709495979    
       12.94280000     3078.110571923358         12.39867193513088    
       12.94660000     3087.692481843407         12.39216142336820    
       12.95040000     3083.372936425528         12.46300188227173    
       12.95420000     3057.727293528288         12.26131824307190    
       12.95800000     3014.513932989055         12.10571219541344    
       12.96180000     2965.676194605286         11.90654762115855    
       12.96560000     2903.262798989680         12.02862954905985    
       12.96940000     2832.564669833017         11.37990613838188    
       12.97320000     2766.719967416341         11.19678877149086    
       12.97700000     2708.036396478701         11.57895224572453    
       12.98080000     2631.923896922091         11.44734281812485    
       12.98460000     2563.464152983083         10.53716570908341    
       12.98840000     2512.270206600324         10.34869559496439    
       12.99220000     2463.022073137641         10.11354421006402    
       12.99600000     2417.965663931636         9.995087542360197    
       12.99980000     2373.738234306400         9.889361725935270    
       13.00360000     2348.488059543229         9.746171956126428    
       13.00740000     2312.676182743674         9.669160489890027    
       13.01120000     2285.909427903474         9.541602493572725    
       13.01500000     2265.875094165054         9.392879751842669    
       13.01880000     2246.093175659846         9.338087986377385    
       13.02260000     2233.354347334325         9.350544601551428    
       13.02640000     2222.672555733718         9.243583157044352    
       13.03020000     2211.541767392210         9.227885309404005    
       13.03400000     2211.653466161584         9.222410874998900    
       13.03780000     2198.538197462216         9.181466711346262    
       13.04160000     2187.361256893593         9.183143463133451    
       13.04540000     2174.105689692650         9.146373990905152    
       13.04920000     2167.708111516902         9.044156759765553    
       13.05300000     2155.658062079862         9.019266944325615    
       13.05680000     2142.294770199475         9.007425413636017    
       13.06060000     2121.668329753739         8.880122992266285    
       13.06440000     2111.416254245174         8.908501120895149    
       13.06820000     2097.035904461786         8.830512249794079    
       13.07200000     2082.088212901114         8.783922442539838    
       13.07580000     2057.229312721411         8.672418704620311    
       13.07960000     2042.603247690282         8.557773502981954    
       13.08340000     2024.752857378906         8.554321456665351    
       13.08720000     2012.350334362156         8.476227663984909    
       13.09100000     2007.645786522994         8.542730779260280    
       13.09480000     1996.991922837484         8.472597096009101    
       13.09860000     1981.311213287685         8.390374842363650    
       13.10240000     1963.758210980912         8.369137750300537    
       13.10620000     1952.765448337422         8.317704029317731    
       13.11000000     1943.649788959499         8.315357937706313    
       13.11380000     1936.288194874180         8.252488371898474    
       13.11760000     1936.717671889570         8.218258754892624    
       13.12140000     1923.615550770024         8.199602553859380    
       13.12520000     1917.843143496634         8.131065335776677    
       13.12900000     1911.419105887353         8.133162924496546    
       13.13280000     1902.035761712026         8.143966746888946    
       13.13660000     1907.861199338121         8.169493302544758    
       13.14040000     1902.140268866614         8.125737402535822    
       13.14420000     1899.956719483673         8.094061284364349    
       13.14800000     1895.085720962191         8.068116840358732    
       13.15180000     1884.916516261387         8.049065248332749    
       13.15560000     1882.016863234872         8.028003890271117    
       13.15940000     1881.385730182393         8.048213534409282    
       13.16320000     1876.289644957891         8.050956684364930    
       13.16700000     1873.486639134368         8.032459232941310    
       13.17080000     1877.732919012341         8.026588377148501    
       13.17460000     1875.605335058984         8.076233206241593    
       13.17840000     1870.712781509702         8.054023776591503    
       13.18220000     1880.972154028111         8.109191764860892    
       13.18600000     1880.518509750340         8.096362838826559    
       13.18980000     1872.048021918446         7.981674731157593    
       13.19360000     1874.448946223482         7.999198813792820    
       13.19740000     1875.213541448236         8.037544071719076    
       13.20120000     1882.746300696612         8.122740747820679    
       13.20500000     1888.403565788070         8.056782360844760    
       13.20880000     1880.995568413192         8.027783332261299    
       13.21260000     1890.192339676083         8.019255185000761    
       13.21640000     1897.307359513791         8.158076583930962    
       13.22020000     1909.621028082215         8.209102742006436    
       13.22400000     1916.615536440804         8.167455555481517    
       13.22780000     1924.095138808558         8.212146320910540    
       13.23160000     1922.902199738948         8.195890556172708    
       13.23540000     1933.794024532235         8.234575035869319    
       13.23920000     1937.642893054063         8.283958834073001    
       13.24300000     1955.700907751858         8.343208915022826    
       13.24680000     1969.956691972516         8.376507567780232    
       13.25060000     1971.135378800254         8.420212098927696    
       13.25440000     1979.357428156188         8.395124700645750    
       13.25820000     1990.535677585533         8.452643595502504    
       13.26200000     1995.050270808950         8.445436445836544    
       13.26580000     2001.478525916825         8.457364204656333    
       13.26960000     1999.557219951171         8.410192281625084    
       13.27340000     2000.811715186471         8.498221230896998    
       13.27720000     1998.043730858751         8.465554047181366    
       13.28100000     1995.201060156739         8.426067613521086    
       13.28480000     1984.851899482529         8.488893776765668    
       13.28860000     1977.335283720837         8.433219679868825    
       13.29240000     1973.637951631567         8.414446059788089    
       13.29620000     1960.647284022593         8.364892709477896    
       13.30000000     1946.690482161985         8.334045186133837    
       13.30380000     1933.216556348284         8.212534860201901    
       13.30760000     1920.125934428669         8.211975410752453    
       13.31140000     1898.045018051821         8.152761550933569    
       13.31520000     1885.737840383171         8.087883636762495    
       13.31900000     1872.557135389217         8.027299803010560    
       13.32280000     1855.935183670907         7.972697509837186    
       13.32660000     1844.201237838784         7.902821724200098    
       13.33040000     1829.569702670979         7.872462060667406    
       13.33420000     1826.857286356887         7.870233617893147    
       13.33800000     1825.322646637945         7.835139040328711    
       13.34180000     1816.016498350357         7.834054157479184    
       13.34560000     1803.958437628389         7.777616712117382    
       13.34940000     1794.125060274410         7.721463251612311    
       13.35320000     1787.046146470502         7.708670241619574    
       13.35700000     1797.539919811609         7.770702975183470    
       13.36080000     1792.453022865406         7.719792486365860    
       13.36460000     1785.880885327081         7.742834482236519    
       13.36840000     1791.024952405115         7.767700188146770    
       13.37220000     1792.121214265131         7.731996267261810    
       13.37600000     1800.420079521523         7.765541550266803    
       13.37980000     1793.060237887047         7.732243168845820    
       13.38360000     1792.310835779184         7.713801648830266    
       13.38740000     1800.888742322801         7.753367781505299    
       13.39120000     1812.430342447915         7.829145616837736    
       13.39500000     1815.067368614004         7.791639535961616    
       13.39880000     1827.824550730580         7.836887247827510    
       13.40260000     1833.534611010879         7.881310011277021    
       13.40640000     1844.230728893945         7.913689483151844    
       13.41020000     1848.533266305251         7.945044824516867    
       13.41400000     1857.243962032567         7.976337154809615    
       13.41780000     1869.626956315932         7.990083130395782    
       13.42160000     1869.419987929708         8.030614586725218    
       13.42540000     1879.580006439586         8.054036127611775    
       13.42920000     1877.958829961597         8.022014965411596    
       13.43300000     1871.688516316969         8.028808519068340    
       13.43680000     1873.985169546206         8.024070233621202    
       13.44060000     1876.746435050507         8.033851288346707    
       13.44440000     1870.365548105484         7.987941402463652    
       13.44820000     1868.267975673817         7.984372338131124    
       13.45200000     1869.114820715762         8.016595476896869    
       13.45580000     1859.196359535495         7.923070903173977    
       13.45960000     1853.683969202815         7.937743285357327    
       13.46340000     1848.257650481615         7.984056230042310    
       13.46720000     1847.595039898790         7.932577734024239    
       13.47100000     1845.632812614372         7.945718521969735    
       13.47480000     1845.744086173703         7.956619077429590    
       13.47860000     1840.962942780357         7.929671792010212    
       13.48240000     1840.577386195876         7.960691794926405    
       13.48620000     1835.481054233443         7.894258315657592    
       13.49000000     1833.877609098163         7.852042794006119    
       13.49380000     1831.755079985935         7.878648474287441    
       13.49760000     1827.661398709981         7.896565745022624    
       13.50140000     1819.696100776742         7.894839504377688    
       13.50520000     1819.491875728415         7.885925454393907    
       13.50900000     1818.614212829167         7.810897061192429    
       13.51280000     1825.385716287441         7.853606514546425    
       13.51660000     1825.864568609531         7.914899434174652    
       13.52040000     1823.677018087018         7.899888334107294    
       13.52420000     1820.708228682804         7.858536507831812    
       13.52800000     1822.827991644793         7.849863614036536    
       13.53180000     1821.653249004564         7.846331656347149    
       13.53560000     1828.166847329590         7.876679376892586    
       13.53940000     1832.389426364126         7.933212852440229    
       13.54320000     1835.543984516100         7.908157954184305    
       13.54700000     1842.011097837154         7.917365673160211    
       13.55080000     1837.677227215948         7.919604176999386    
       13.55460000     1834.608960780503         7.890371123555112    
       13.55840000     1849.682885304679         7.978175991406511    
       13.56220000     1850.396227987847         7.947974894135672    
       13.56600000     1858.118768556772         7.953924173724118    
       13.56980000     1861.734756316657         7.929359244038435    
       13.57360000     1871.228379887365         8.033964879331785    
       13.57740000     1882.745991952863         8.092799536441721    
       13.58120000     1890.733665921999         8.053206215251231    
       13.58500000     1898.558407987402         8.155875257572667    
       13.58880000     1906.915355256773         8.203650815223918    
       13.59260000     1908.977944268717         8.167150360685380    
       13.59640000     1924.132058333088         8.216076670099868    
       13.60020000     1924.112243130782         8.260771112243640    
       13.60400000     1935.767303000978         8.231187943301089    
       13.60780000     1934.524245103450         8.261601831982388    
       13.61160000     1925.106710680019         8.225698864521480    
       13.61540000     1926.759876872499         8.204261161385674    
       13.61920000     1925.944063991213         8.219464237806971    
       13.62300000     1914.530178850385         8.176802992879649    
       13.62680000     1904.750792869159         8.153027326374147    
       13.63060000     1897.458457500845         8.124996280730054    
       13.63440000     1884.598637141192         8.052631227588735    
       13.63820000     1861.439685963287         7.957558369457240    
       13.64200000     1848.823481621862         7.943041375834660    
       13.64580000     1827.756950167880         7.873742095666493    
       13.64960000     1819.492908101429         7.816404379531043    
       13.65340000     1812.110083957317         7.830513795132122    
       13.65720000     1800.610140825054         7.780506323228995    
       13.66100000     1776.928019453520         7.677903018637164    
       13.66480000     1772.947701641715         7.680762828585866    
       13.66860000     1774.273124674976         7.672709755736917    
       13.67240000     1763.604587003332         7.627132004728391    
       13.67620000     1752.155174977644         7.594616409627148    
       13.68000000     1745.368342110250         7.559276172822011    
       13.68380000     1740.870095569263         7.544218108234393    
       13.68760000     1746.426685108446         7.516956874454875    
       13.69140000     1739.568066074950         7.559902304235544    
       13.69520000     1743.983288397705         7.501872189406253    
       13.69900000     1738.951189543579         7.554137720905953    
       13.70280000     1748.389325438656         7.588601249852618    
       13.70660000     1741.307102353906         7.531277862001283    
       13.71040000     1753.426871837924         7.588979552981988    
       13.71420000     1755.130474000151         7.625173206359928    
       13.71800000     1758.826583507137         7.625679955897922    
       13.72180000     1757.015685821486         7.668076344020743    
       13.72560000     1767.115325934098         7.648956022431711    
       13.72940000     1769.188723779115         7.651435496802834    
       13.73320000     1776.226285525268         7.701311770036233    
       13.73700000     1780.177990823661         7.706432812822925    
       13.74080000     1781.089248510379         7.660328511023903    
       13.74460000     1771.725569996386         7.651497613444901    
       13.74840000     1779.838738538755         7.727162568862096    
       13.75220000     1784.079241636452         7.722680536890469    
       13.75600000     1779.131795943329         7.647891832910143    
       13.75980000     1784.260373782789         7.687026108805721    
       13.76360000     1786.509053488874         7.767093689107780    
       13.76740000     1774.679661281716         7.676174462406277    
       13.77120000     1779.886436325810         7.658157958262739    
       13.77500000     1767.919402968680         7.673428483939739    
       13.77880000     1769.221879821630         7.647995309870042    
       13.78260000     1771.634031359051         7.672488794045520    
       13.78640000     1769.665757366907         7.633380045756670    
       13.79020000     1772.397503638090         7.678770185641898    
       13.79400000     1765.670874534255         7.703491801548091    
       13.79780000     1760.364976535316         7.620272678946673    
       13.80160000     1766.554921015366         7.698598277654458    
       13.80540000     1768.726095434231         7.694994407135174    
       13.80920000     1770.825942339477         7.600220629421120    
       13.81300000     1761.209249203763         7.599977127560452    
       13.81680000     1759.148961787418         7.661959568696127    
       13.82060000     1763.054075361272         7.653154544351633    
       13.82440000     1770.521102243282         7.680171644400621    
       13.82820000     1765.468190512809         7.635506179806591    
       13.83200000     1762.533869862767         7.634285899277653    
       13.83580000     1764.910785444051         7.633922418753793    
       13.83960000     1775.035676989036         7.691007796093731    
       13.84340000     1784.898343577082         7.727440983020322    
       13.84720000     1775.417450545681         7.696502830591320    
       13.85100000     1779.990719327312         7.708601989998072    
       13.85480000     1784.599632206428         7.713014940463098    
       13.85860000     1792.577105774709         7.789245513560872    
       13.86240000     1798.529276308062         7.770388515644074    
       13.86620000     1798.860375473238         7.733265311061937    
       13.87000000     1808.711819838793         7.796891696290064    
       13.87380000     1819.790127130468         7.855625102175019    
       13.87760000     1833.913531631694         7.897192189042661    
       13.88140000     1845.974492802473         7.910533760077484    
       13.88520000     1857.536479259558         7.990205290224704    
       13.88900000     1875.648196466306         8.070208723150968    
       13.89280000     1881.501648643496         8.080640644623381    
       13.89660000     1904.599634206376         8.137533962970437    
       13.90040000     1927.366463391045         8.233154769089053    
       13.90420000     1949.277007285763         8.261701169278131    
       13.90800000     1977.544822907076         8.422653671668666    
       13.91180000     2001.283894260561         8.491605745398669    
       13.91560000     2020.233493315051         8.516665809170888    
       13.91940000     2049.162409729655         8.663380151317128    
       13.92320000     2076.131404331515         8.740225593728406    
       13.92700000     2124.860588323633         8.960265769066686    
       13.93080000     2157.865875771503         9.093934047359539    
       13.93460000     2199.536899687467         9.222185268008960    
       13.93840000     2225.395899038775         9.240155442867875    
       13.94220000     2256.893364295330         9.428527024768767    
       13.94600000     2296.199266361788         9.535016084600326    
       13.94980000     2331.308652399568         9.686129464463971    
       13.95360000     2365.488424657739         9.870173998539000    
       13.95740000     2401.869605203533         9.963563055058163    
       13.96120000     2420.786168229807         10.01115346245385    
       13.96500000     2442.898968284179         10.13620482183465    
       13.96880000     2446.086969327202         10.10399606883076    
       13.97260000     2455.700679597274         10.06858124635158    
       13.97640000     2436.196072829607         10.08070073433224    
       13.98020000     2430.477236881301         10.08662502666932    
       13.98400000     2400.034055872423         9.894619007484557    
       13.98780000     2361.925925767538         9.746416557460517    
       13.99160000     2313.766947055046         9.636908712387564    
       13.99540000     2270.385811489690         9.412026676614987    
       13.99920000     2215.984013180358         9.263681029528849    
       14.00300000     2168.919216817257         9.114935594234520    
       14.00680000     2111.798881520015         8.904865733016530    
       14.01060000     2081.939893498636         8.767881790493972    
       14.01440000     2036.685822347961         8.627878063382058    
       14.01820000     1990.757940328162         8.467867086098595    
       14.02200000     1955.719894231697         8.426444061315259    
       14.02580000     1926.826095720622         8.253941357072655    
       14.02960000     1897.203080094239         8.128238256528586    
       14.03340000     1888.172344102213         8.061819495270862    
       14.03720000     1854.148039164975         7.985215676799366    
       14.04100000     1830.110444983373         7.865875212256650    
       14.04480000     1815.338770366495         7.844950854256907    
       14.04860000     1805.917894522344         7.869940089477311    
       14.05240000     1802.194129274904         7.838499885741053    
       14.05620000     1791.388736148767         7.707871360497718    
       14.06000000     1772.072377162857         7.668805984500322    
       14.06380000     1784.348467761112         7.730251782065550    
       14.06760000     1777.856460092834         7.707650824838367    
       14.07140000     1780.812806603995         7.651272011535838    
       14.07520000     1767.462830380235         7.621139751879934    
       14.07900000     1770.565103140219         7.642145967277314    
       14.08280000     1772.788916436273         7.702206390399938    
       14.08660000     1786.101656798376         7.709717224226232    
       14.09040000     1778.013634941715         7.712655292325453    
       14.09420000     1773.581300959644         7.699179871608298    
       14.09800000     1767.120875905134         7.622896962701391    
       14.10180000     1771.452948831374         7.708651145701659    
       14.10560000     1761.281103854771         7.694397447704803    
       14.10940000     1756.725193305084         7.597965928847126    
       14.11320000     1749.787576253073         7.557831102849669    
       14.11700000     1738.719874629528         7.562355643960606    
       14.12080000     1734.992470016885         7.564904297916049    
       14.12460000     1718.133742677803         7.445066897100260    
       14.12840000     1707.632463137491         7.401555887704223    
       14.13220000     1707.770127570519         7.404390196186972    
       14.13600000     1697.098849434048         7.402597445139493    
       14.13980000     1693.148150536508         7.372456631821523    
       14.14360000     1689.351214260037         7.429001738503130    
       14.14740000     1686.296822659268         7.351690550363901    
       14.15120000     1683.636150738527         7.330919081757726    
       14.15500000     1686.198507166693         7.353088065923865    
       14.15880000     1683.998001891067         7.383363874313208    
       14.16260000     1681.870209964099         7.385709350322081    
       14.16640000     1678.401002425492         7.329827196558759    
       14.17020000     1688.645052812898         7.379427978575425    
       14.17400000     1695.595850035633         7.402183060001753    
       14.17780000     1698.983898204549         7.399499627159532    
       14.18160000     1706.920383744509         7.377233604045395    
       14.18540000     1712.178861406034         7.465357618949940    
       14.18920000     1719.326298081540         7.510228562577346    
       14.19300000     1732.898915076740         7.559086447000964    
       14.19680000     1745.023840750384         7.586128314752160    
       14.20060000     1750.408552573659         7.578357489231577    
       14.20440000     1759.715548996554         7.573272438504496    
       14.20820000     1770.654925311767         7.645886408739864    
       14.21200000     1776.226022592675         7.683553675454316    
       14.21580000     1781.090643724246         7.698487531068892    
       14.21960000     1782.616535486657         7.711132300116673    
       14.22340000     1783.463379588120         7.709838164621457    
       14.22720000     1786.126055592256         7.753394447545929    
       14.23100000     1791.768477964227         7.747423869656729    
       14.23480000     1795.541974939834         7.755493364896066    
       14.23860000     1802.242169476024         7.730261051474307    
       14.24240000     1809.853012703079         7.811251648617200    
       14.24620000     1815.157334487208         7.827542083663269    
       14.25000000     1823.031071335438         7.843576215777385    
       14.25380000     1834.604945008036         7.940043102313015    
       14.25760000     1843.053825217296         7.922026053701897    
       14.26140000     1849.860661404279         7.936404225815524    
       14.26520000     1861.504325089695         8.004531844821052    
       14.26900000     1871.814624635814         7.996125230682599    
       14.27280000     1875.382500254726         7.991144675261105    
       14.27660000     1877.833785384284         8.061179717934953    
       14.28040000     1880.191342554314         8.106789667301459    
       14.28420000     1870.213531715876         7.997960569822842    
       14.28800000     1863.212059991371         7.974736185106655    
       14.29180000     1844.360671652560         7.927516808837916    
       14.29560000     1823.480705620157         7.790508073097562    
       14.29940000     1795.111066856957         7.753076566167828    
       14.30320000     1763.642869385807         7.634128921066533    
       14.30700000     1728.060948253751         7.509598700864352    
       14.31080000     1706.618462996107         7.410326851499927    
       14.31460000     1678.476889423982         7.333960164383546    
       14.31840000     1654.248220099616         7.234574210343778    
       14.32220000     1628.753158310152         7.236013047756003    
       14.32600000     1606.644639025070         7.112110164595190    
       14.32980000     1585.501095917404         7.004087519145123    
       14.33360000     1574.019560368358         6.945926348457736    
       14.33740000     1559.522603480789         6.910718365188311    
       14.34120000     1553.843435814529         6.853464910505185    
       14.34500000     1534.539683071166         6.799288815527707    
       14.34880000     1531.604346847668         6.835548242043184    
       14.35260000     1527.880519256486         6.830856898196941    
       14.35640000     1518.430677737375         6.727697811448331    
       14.36020000     1519.076266706775         6.739146186276318    
       14.36400000     1514.798616539437         6.776575491098613    
       14.36780000     1502.568022188538         6.719087002639758    
       14.37160000     1510.561183616322         6.690543158743197    
       14.37540000     1497.175412826702         6.653193709653174    
       14.37920000     1500.528750416559         6.665272456534364    
       14.38300000     1499.249349503801         6.725594976238794    
       14.38680000     1497.722236900777         6.679780011317335    
       14.39060000     1485.208977578437         6.659246499568134    
       14.39440000     1483.395020601066         6.635672360331553    
       14.39820000     1485.455886464888         6.621048896808735    
       14.40200000     1483.275829880781         6.625933111073697    
       14.40580000     1476.972247027277         6.636368685610504    
       14.40960000     1484.260127535636         6.611225387860307    
       14.41340000     1479.690504855530         6.588856510145410    
       14.41720000     1484.564432614897         6.626972337694986    
       14.42100000     1478.752670453502         6.662463807051888    
       14.42480000     1479.407106941668         6.594355979238972    
       14.42860000     1473.147978352773         6.586251520388544    
       14.43240000     1478.066931308482         6.612728611836341    
       14.43620000     1472.178268228689         6.560504091093062    
       14.44000000     1472.200329755053         6.556106492970438    
       14.44380000     1468.153498827120         6.599176130390672    
       14.44760000     1465.932981335425         6.538123141436750    
       14.45140000     1465.937209074737         6.552740600821413    
       14.45520000     1470.513645880904         6.566959987577080    
       14.45900000     1467.077474764641         6.569442451465004    
       14.46280000     1466.542991493543         6.575039798349149    
       14.46660000     1461.260747327923         6.552347058651314    
       14.47040000     1462.035268717278         6.560883763285741    
       14.47420000     1458.584404275841         6.542232424952696    
       14.47800000     1459.035948670880         6.545626985010429    
       14.48180000     1456.899926768327         6.518353069007715    
       14.48560000     1459.794514203487         6.554366531502891    
       14.48940000     1457.939070783147         6.564117552536476    
       14.49320000     1455.531980683965         6.545068709521077    
       14.49700000     1456.153503418936         6.541923488822145    
       14.50080000     1458.457234926609         6.509777929655590    
       14.50460000     1453.068577744250         6.495184358676738    
       14.50840000     1458.893003720768         6.504566691851069    
       14.51220000     1463.372055266076         6.537565091293106    
       14.51600000     1455.405308516389         6.498851213146819    
       14.51980000     1454.117900249912         6.530944071381476    
       14.52360000     1457.757238687766         6.538001144522112    
       14.52740000     1456.469661352944         6.545693479874761    
       14.53120000     1455.574334175128         6.537172690697941    
       14.53500000     1461.514813491107         6.552584125090803    
       14.53880000     1463.279947378006         6.542973682152659    
       14.54260000     1457.551239700233         6.547208055844699    
       14.54640000     1458.147727609891         6.563938944999987    
       14.55020000     1455.655895283918         6.510423932765480    
       14.55400000     1458.490644401458         6.542540524310983    
       14.55780000     1458.524364697094         6.503850281539725    
       14.56160000     1459.719522382760         6.509441863788806    
       14.56540000     1466.540800396325         6.546465522961598    
       14.56920000     1462.199903235971         6.508897468135671    
       14.57300000     1467.168242932148         6.516115504701550    
       14.57680000     1465.849672927312         6.561161013848256    
       14.58060000     1472.315970962316         6.587118135330710    
       14.58440000     1473.321952426727         6.578172224770326    
       14.58820000     1473.084768544420         6.547235257967152    
       14.59200000     1468.723489444343         6.589417713558617    
       14.59580000     1472.437487068450         6.557785045245750    
       14.59960000     1476.935078512642         6.610224083505926    
       14.60340000     1476.996262286582         6.608286826591698    
       14.60720000     1479.959070273069         6.639375394731566    
       14.61100000     1486.782851291309         6.653973830179231    
       14.61480000     1486.866386898515         6.633383960710082    
       14.61860000     1495.908870039854         6.682626303020157    
       14.62240000     1492.692111938810         6.730786243019124    
       14.62620000     1497.551311561181         6.706652016455988    
       14.63000000     1501.182207771225         6.709707542617941    
       14.63380000     1500.189840394552         6.687574152038034    
       14.63760000     1500.707163680251         6.740571730846123    
       14.64140000     1496.447584813142         6.654394483590926    
       14.64520000     1498.586788865365         6.631890064234290    
       14.64900000     1501.484979039348         6.690336747477287    
       14.65280000     1502.767912846888         6.717056668216673    
       14.65660000     1497.130984864674         6.645795561585722    
       14.66040000     1494.402208053882         6.637043271691449    
       14.66420000     1491.350355847774         6.643653176049922    
       14.66800000     1485.525665615186         6.618871391754704    
       14.67180000     1494.915751029719         6.617108350687436    
       14.67560000     1478.414741549395         6.573637948895734    
       14.67940000     1483.964226102658         6.619942678407098    
       14.68320000     1480.570335641881         6.638669566711845    
       14.68700000     1483.523882317623         6.627269646929745    
       14.69080000     1474.598367465141         6.596496485406065    
       14.69460000     1474.286678529954         6.585634414137947    
       14.69840000     1472.061376701606         6.572093057759067    
       14.70220000     1471.544580100057         6.600801062156732    
       14.70600000     1464.088610159096         6.579927136169510    
       14.70980000     1473.009007201400         6.566980261626803    
       14.71360000     1460.983794083489         6.501134695546342    
       14.71740000     1460.891369392581         6.527481988323794    
       14.72120000     1473.253486534549         6.636953567245534    
       14.72500000     1470.964015422806         6.544648479859098    
       14.72880000     1469.102782401057         6.579602138271173    
       14.73260000     1470.379697466918         6.552664925256173    
       14.73640000     1471.852780834165         6.547650144213007    
       14.74020000     1469.544364390177         6.532894746783930    
       14.74400000     1465.663198227993         6.578937902453762    
       14.74780000     1467.046229164828         6.556767213327266    
       14.75160000     1471.804980706227         6.591733285246392    
       14.75540000     1469.630398694940         6.559599233378863    
       14.75920000     1469.305353218752         6.548127975619939    
       14.76300000     1473.074349869247         6.595386354125917    
       14.76680000     1469.762517529922         6.576319829283339    
       14.77060000     1478.395503370682         6.596808602911843    
       14.77440000     1475.787953640522         6.598040623703462    
       14.77820000     1475.585413012021         6.561880628461179    
       14.78200000     1482.883909049525         6.586364783665903    
       14.78580000     1482.150168166346         6.624689352413779    
       14.78960000     1487.427247055457         6.642129151976339    
       14.79340000     1487.105346118976         6.676176978568944    
       14.79720000     1492.602161165704         6.671564201728799    
       14.80100000     1495.500118147434         6.630759224804467    
       14.80480000     1494.060983441967         6.650490127949567    
       14.80860000     1508.492344478507         6.705746503883756    
       14.81240000     1516.512390195297         6.748488056457100    
       14.81620000     1515.896681415923         6.718818311229693    
       14.82000000     1518.198101092251         6.767362480458394    
       14.82380000     1522.698128277325         6.773325945336890    
       14.82760000     1527.172528878688         6.792356092749648    
       14.83140000     1531.824673304617         6.838273287373940    
       14.83520000     1532.933938316237         6.839864147515328    
       14.83900000     1535.300251399030         6.823817260582898    
       14.84280000     1531.370434428939         6.858611176716524    
       14.84660000     1535.116235863195         6.820663542138516    
       14.85040000     1538.438891469821         6.811508551885198    
       14.85420000     1539.542751378603         6.796749431041220    
       14.85800000     1543.152847055792         6.808709642976040    
       14.86180000     1546.986809934361         6.826618378644362    
       14.86560000     1551.386119292654         6.858636411210640    
       14.86940000     1549.284871309608         6.854753093611776    
       14.87320000     1552.022442173881         6.805729676476528    
       14.87700000     1562.039342926590         6.918122645621367    
       14.88080000     1570.681934019131         6.983379861421741    
       14.88460000     1580.565000238883         6.977483347884060    
       14.88840000     1586.182695519264         6.985829789216845    
       14.89220000     1597.156477650908         7.050679123169572    
       14.89600000     1605.275825510252         7.084495699630944    
       14.89980000     1612.258606279202         7.082508556035554    
       14.90360000     1623.607208893156         7.137299808843951    
       14.90740000     1638.581653175630         7.242125550033605    
       14.91120000     1647.501519132226         7.270321770751988    
       14.91500000     1658.109427508100         7.280823375465308    
       14.91880000     1664.698254326211         7.287747080687662    
       14.92260000     1662.640802878489         7.325059233737206    
       14.92640000     1657.614165063177         7.304793680037267    
       14.93020000     1664.218582454820         7.316423875393494    
       14.93400000     1652.415689650339         7.209818477565633    
       14.93780000     1632.845956979778         7.187616537125179    
       14.94160000     1618.285887037153         7.111155421229677    
       14.94540000     1606.789140681705         7.029568477525838    
       14.94920000     1598.004717927113         7.038283309586835    
       14.95300000     1573.606501894234         6.991460822066856    
       14.95680000     1561.865697119149         6.895072101648759    
       14.96060000     1549.230353135118         6.864483716582803    
       14.96440000     1544.448192647782         6.830625401464036    
       14.96820000     1532.247136073093         6.777918388873402    
       14.97200000     1531.252331630120         6.752281671866410    
       14.97580000     1515.615118829180         6.694846683755981    
       14.97960000     1514.428571028393         6.705395763836184    
       14.98340000     1509.836085234019         6.716319469293263    
       14.98720000     1502.300489895644         6.678098264460182    
       14.99100000     1499.824953586946         6.639132781627552    
       14.99480000     1488.106623828341         6.622991938067833    
       14.99860000     1482.730888001014         6.614622939043256    
       15.00240000     1479.521515590651         6.619373610758251    
       15.00620000     1475.134962620923         6.651811602892069    
       15.01000000     1471.855099944662         6.588117546045190    
       15.01380000     1453.687960785255         6.483817980342806    
       15.01760000     1454.095161300158         6.494897189483796    
       15.02140000     1454.327749320917         6.552759437688951    
       15.02520000     1442.189433070545         6.442652133889029    
       15.02900000     1428.459776172137         6.404412975054250    
       15.03280000     1424.651174160693         6.412596446959411    
       15.03660000     1419.375512631315         6.335080398370168    
       15.04040000     1423.072680232782         6.364520147802842    
       15.04420000     1407.097604932127         6.368061865514108    
       15.04800000     1398.689431384427         6.252829533496737    
       15.05180000     1406.999740698131         6.334609737498935    
       15.05560000     1398.109274759919         7.288989078167667    
       15.05940000     1397.635531911970         7.242397245422608    
       15.06320000     1391.835217692601         7.270225985806759    
       15.06700000     1387.349038543098         7.258466399868942    
       15.07080000     1388.149254651985         7.230961681885395    
       15.07460000     1383.572004950575         7.237026564032523    
       15.07840000     1380.478699769932         7.179214915208494    
       15.08220000     1376.852490453901         7.152619440467306    
       15.08600000     1375.078125787611         7.180700255595842    
       15.08980000     1378.683461545279         7.205600385485273    
       15.09360000     1376.052267155847         7.252697720305993    
       15.09740000     1372.870472281653         7.199340853037706    
       15.10120000     1365.810951614639         7.140560045108103    
       15.10500000     1365.375067442539         7.150874493524654    
       15.10880000     1369.965623295559         7.169090164621230    
       15.11260000     1370.539199478174         7.191834058345843    
       15.11640000     1373.991781669798         7.168036440085034    
       15.12020000     1368.778241730911         7.190271874483201    
       15.12400000     1372.084078805551         7.197575478138497    
       15.12780000     1375.835471811851         7.220739805095754    
       15.13160000     1375.573545227569         7.250109729709100    
       15.13540000     1366.451757766744         7.171564771278672    
       15.13920000     1369.799477765842         7.184853083072350    
       15.14300000     1371.197103378117         7.248916548622376    
       15.14680000     1370.619597719771         7.181529747426109    
       15.15060000     1378.062880999580         7.205672595696980    
       15.15440000     1372.034774174742         7.131246660210611    
       15.15820000     1369.669253738646         7.139535731244304    
       15.16200000     1370.611176454347         7.138357107152037    
       15.16580000     1373.552598870518         7.152044537184596    
       15.16960000     1377.224667269661         7.205988816534953    
       15.17340000     1376.699782828251         7.133619283301606    
       15.17720000     1369.047397549078         7.158028691679692    
       15.18100000     1375.076210921675         7.237359461836825    
       15.18480000     1373.581014193835         7.192973500529433    
       15.18860000     1369.939061721203         7.159294885542912    
       15.19240000     1380.055260727552         7.232990462873017    
       15.19620000     1378.391520161507         7.238522229879436    
       15.20000000     1376.718439811184         7.205868979259241    
       15.20380000     1379.312483428557         7.195700726435216    
       15.20760000     1383.683945397649         7.290437169966915    
       15.21140000     1386.595935026853         7.310086173031621    
       15.21520000     1388.072676463224         7.287561832571233    
       15.21900000     1387.615335657431         7.261796389348066    
       15.22280000     1388.744250971586         7.268492453305003    
       15.22660000     1395.364351486093         7.335243369938366    
       15.23040000     1396.729902416444         7.314848721720118    
       15.23420000     1400.376744671831         7.310027025285105    
       15.23800000     1398.411741055724         7.331454683756750    
       15.24180000     1404.857651142138         7.314098345587774    
       15.24560000     1408.949145768570         6.505318277839358    
       15.24940000     1423.496206605081         6.325547524067908    
       15.25320000     1418.664191558537         6.366652317913953    
       15.25700000     1418.481145819085         6.331831083126028    
       15.26080000     1422.904676902649         6.362593089984410    
       15.26460000     1431.216653697643         6.434859629061639    
       15.26840000     1434.613463681159         6.402944351801136    
       15.27220000     1448.566703912601         6.450965359046888    
       15.27600000     1456.956826135597         6.509580994030615    
       15.27980000     1470.370550308440         6.545429173195573    
       15.28360000     1475.034927574689         6.554755353441280    
       15.28740000     1488.619671862023         6.632153088144807    
       15.29120000     1499.507567880649         6.636300712429207    
       15.29500000     1502.810415172422         6.642131826968212    
       15.29880000     1509.201897788267         6.704657387461298    
       15.30260000     1514.497284023071         6.738858607134187    
       15.30640000     1518.984105626016         6.795657980797208    
       15.31020000     1524.715608385247         6.771089578849078    
       15.31400000     1515.911071569020         6.720935692185854    
       15.31780000     1516.785309407933         6.728596678646533    
       15.32160000     1508.680428957678         6.747636553067271    
       15.32540000     1498.189461835044         6.655245885061015    
       15.32920000     1484.405696202421         6.645181703154938    
       15.33300000     1479.776340722550         6.624557039525135    
       15.33680000     1462.920144764588         6.487176917947595    
       15.34060000     1457.992546902638         6.484804976332578    
       15.34440000     1439.760537303557         6.465195272583903    
       15.34820000     1433.825256754404         6.390187610228812    
       15.35200000     1424.073076165735         6.339413836750287    
       15.35580000     1419.221785658199         7.217278738005019    
       15.35960000     1398.415832418739         7.239973637376336    
       15.36340000     1399.464753240043         7.296409271381850    
       15.36720000     1400.735866972816         7.285782033341027    
       15.37100000     1399.125669473240         7.253518816198978    
       15.37480000     1387.706182794806         7.300424371938287    
       15.37860000     1377.427214088945         7.178930319291681    
       15.38240000     1371.127975371009         7.159732368452666    
       15.38620000     1377.888119079740         7.164243447475875    
       15.39000000     1372.717687177238         7.143702651132709    
       15.39380000     1369.885360497623         7.216250901232383    
       15.39760000     1358.218594594667         7.094932763382706    
       15.40140000     1359.020232660373         7.119677647129389    
       15.40520000     1361.410398080889         7.145864732090574    
       15.40900000     1358.809365598868         7.098443660740475    
       15.41280000     1354.348933702303         7.112313722838025    
       15.41660000     1348.330497003092         7.045772488394942    
       15.42040000     1341.100608190940         7.020122310162112    
       15.42420000     1343.777379763768         7.069832760650803    
       15.42800000     1345.874056335415         7.068117848176261    
       15.43180000     1342.768119728309         7.090649168894659    
       15.43560000     1341.305432980454         7.069432474891733    
       15.43940000     1341.317071022702         7.079014930297537    
       15.44320000     1341.542991247317         7.077848595599963    
       15.44700000     1340.315542533735         7.058066688111150    
       15.45080000     1349.931557943782         7.108210885468235    
       15.45460000     1348.926416133368         7.025710140067688    
       15.45840000     1350.814877307979         7.039149097117640    
       15.46220000     1358.763489493771         7.057041445327172    
       15.46600000     1361.634720232792         7.112777375368589    
       15.46980000     1370.037862446295         7.166165027369534    
       15.47360000     1382.922331415266         7.154292896131376    
       15.47740000     1394.229878655487         7.248130318475704    
       15.48120000     1401.477739249800         7.347018431416724    
       15.48500000     1412.712059417966         7.369272952650946    
       15.48880000     1425.395033860941         7.388516811131283    
       15.49260000     1432.903189604913         7.465607160169360    
       15.49640000     1445.934883678694         7.503793268352937    
       15.50020000     1452.233021836256         7.490748655708667    
       15.50400000     1459.611847062932         7.531756481571380    
       15.50780000     1463.193592044569         7.601783808895812    
       15.51160000     1462.708787680295         7.597165186428562    
       15.51540000     1458.700970081082         7.575364798379266    
       15.51920000     1457.579439877005         7.544239257175688    
       15.52300000     1447.331693395341         7.503512511913308    
       15.52680000     1442.933705009219         7.519850719512982    
       15.53060000     1438.354717800710         7.476764156825246    
       15.53440000     1420.849363297008         7.363608450853034    
       15.53820000     1416.202652076122         7.391829384719303    
       15.54200000     1415.058734078642         7.359566771345358    
       15.54580000     1401.508805360349         6.643496329947007    
       15.54960000     1397.060487651884         6.246259425405153    
       15.55340000     1382.255464149953         6.218226602904308    
       15.55720000     1381.476526549066         6.206353819371798    
       15.56100000     1376.990721934012         6.216785516803570    
       15.56480000     1373.279886866074         6.196557279992207    
       15.56860000     1363.019931841051         6.134822656381052    
       15.57240000     1365.562207076033         6.149050887885211    
       15.57620000     1356.300627855857         6.108521890689238    
       15.58000000     1348.770198872510         6.087980714210063    
       15.58380000     1341.747298388696         6.064041444120790    
       15.58760000     1342.391901329710         6.107487172711843    
       15.59140000     1342.444650005534         6.075175272053103    
       15.59520000     1334.489449975270         6.049638547892711    
       15.59900000     1332.334572068445         6.029782448294331    
       15.60280000     1327.301781266118         6.055604901761400    
       15.60660000     1315.921845605729         6.026786155560663    
       15.61040000     1313.201918423109         5.975826179359388    
       15.61420000     1313.621462382100         5.990801911799708    
       15.61800000     1311.609751593358         5.998894256915498    
       15.62180000     1308.043641904984         5.983312151406849    
       15.62560000     1298.227421156442         5.919533788303939    
       15.62940000     1289.056242912339         5.914361203366750    
       15.63320000     1300.683678334630         5.964264546056733    
       15.63700000     1296.356165506465         5.903305728592335    
       15.64080000     1302.407245987316         5.931225434158804    
       15.64460000     1283.038054305498         5.891990052277547    
       15.64840000     1293.624610531474         5.871697065319986    
       15.65220000     1289.919379558542         5.864616461013300    
       15.65600000     1289.632279763586         6.835618667815277    
       15.65980000     1283.383251652210         6.773708774139723    
       15.66360000     1278.329471096879         6.783528554457674    
       15.66740000     1275.926883369313         6.750341076314752    
       15.67120000     1287.776265492239         6.799477227506740    
       15.67500000     1288.063901258512         6.860607590089180    
       15.67880000     1282.810973479514         6.763361787727716    
       15.68260000     1278.243970597938         6.742257658327969    
       15.68640000     1286.225901205023         6.767216917123354    
       15.69020000     1280.525434958673         6.757388425161757    
       15.69400000     1279.505521994048         6.818770722488306    
       15.69780000     1283.137823017842         6.754600068223893    
       15.70160000     1284.348658109999         6.811790109591302    
       15.70540000     1280.349615882448         6.799614100500182    
       15.70920000     1284.907241690584         6.775870737450957    
       15.71300000     1282.976270910446         6.817280678139926    
       15.71680000     1289.064920007515         6.820800992209891    
       15.72060000     1284.861541379054         6.760556380242808    
       15.72440000     1285.421125373000         6.819027010352531    
       15.72820000     1292.169046164327         6.818475217232861    
       15.73200000     1292.562977682445         6.867795435636307    
       15.73580000     1289.659255582159         6.832212684463976    
       15.73960000     1293.061013185810         6.851486024889251    
       15.74340000     1293.551860777405         6.812785114119845    
       15.74720000     1300.360943954963         6.851485769783656    
       15.75100000     1304.851655509308         6.901362940831180    
       15.75480000     1308.594323191942         6.867661283912324    
       15.75860000     1312.443337119876         6.872786063103932    
       15.76240000     1315.331626242740         6.870671275738292    
       15.76620000     1317.539503904385         6.920509705453180    
       15.77000000     1332.456772676242         6.973784907567529    
       15.77380000     1338.729447782358         6.952696389570186    
       15.77760000     1349.072871395355         7.050210252671818    
       15.78140000     1354.968080377014         7.102229097740547    
       15.78520000     1365.060589579387         7.142548445284326    
       15.78900000     1378.120386320386         7.144022544808880    
       15.79280000     1382.659471624303         7.179392600681664    
       15.79660000     1394.741032165260         7.234157647453390    
       15.80040000     1403.399857660202         7.259867586112518    
       15.80420000     1414.815859174712         7.354007069688109    
       15.80800000     1423.259935175212         7.394412163336236    
       15.81180000     1425.780660308039         7.392365704399191    
       15.81560000     1430.657593415039         7.457738427629140    
       15.81940000     1436.463134196449         7.430757769816423    
       15.82320000     1434.912291871497         7.427259464085059    
       15.82700000     1439.575151703155         7.468744199688480    
       15.83080000     1445.329223815520         7.445851365259945    
       15.83460000     1448.255276875408         7.455256366129766    
       15.83840000     1447.302977073314         7.426964297492591    
       15.84220000     1449.873976827719         7.466429015067799    
       15.84600000     1448.621053943517         6.712640026282654    
       15.84980000     1458.069437265813         6.494125284866016    
       15.85360000     1465.776777984277         6.541912476864706    
       15.85740000     1476.329523466551         6.563992762180786    
       15.86120000     1483.809689038701         6.620036601076856    
       15.86500000     1493.978291200996         6.649496152840115    
       15.86880000     1503.139617481307         6.684070615937178    
       15.87260000     1524.788031494428         6.737389363646150    
       15.87640000     1533.403654113368         6.754183505747054    
       15.88020000     1542.930406222991         6.799060077531179    
       15.88400000     1544.035075289732         6.810966353050103    
       15.88780000     1548.954923557525         6.871509614051353    
       15.89160000     1557.559799279283         6.858028863755249    
       15.89540000     1550.492127023000         6.828986244398432    
       15.89920000     1544.542541010794         6.809590499750424    
       15.90300000     1537.444276634969         6.797283120056704    
       15.90680000     1523.231661483715         6.777472897054446    
       15.91060000     1509.389352099097         6.723652948151430    
       15.91440000     1496.562316284429         6.681946838063147    
       15.91820000     1473.022897544393         6.585983481266918    
       15.92200000     1455.682897992575         6.499163788631502    
       15.92580000     1441.017351338082         6.422887937309801    
       15.92960000     1427.003456760279         6.406827187430197    
       15.93340000     1401.099869121864         6.343355311556011    
       15.93720000     1387.927611668996         6.229817805374236    
       15.94100000     1368.274759996754         6.155969781008911    
       15.94480000     1362.751943945505         6.176532934450703    
       15.94860000     1341.683262337487         6.049773335516274    
       15.95240000     1335.753463857741         6.062599107081799    
       15.95620000     1330.693839658668         6.990900298269764    
       15.96000000     1320.897137489219         6.924781910290681    
       15.96380000     1319.916431806546         6.949579079150489    
       15.96760000     1315.697353836534         6.884250551156967    
       15.97140000     1299.617981716371         6.818253208300848    
       15.97520000     1303.097712964741         6.933188824423654    
       15.97900000     1298.682464876956         6.891830587740444    
       15.98280000     1289.837964882506         6.805384125451369    
       15.98660000     1301.720667725740         6.833395119287828    
       15.99040000     1283.443609643456         6.746238042998514    
       15.99420000     1288.962796734755         6.881105787696341    
       15.99800000     1287.205300524415         6.762774910702451    
       16.00180000     1289.747219746964         6.869203437957694    
       16.00560000     1277.416181009362         6.754748503449237    
       16.00940000     1285.062913379179         6.730758796989710    
       16.01320000     1294.404613895450         6.851530377558004    
       16.01700000     1286.741926873356         6.834893152749875    
       16.02080000     1278.664590806795         6.756278793348606    
       16.02460000     1283.834636519108         6.790834157892282    
       16.02840000     1283.585836305244         6.708605677377722    
       16.03220000     1290.467596824987         6.825231032753187    
       16.03600000     1292.311971203731         6.836818523718132    
       16.03980000     1301.463655124114         6.862868428675950    
       16.04360000     1312.495146170884         6.879300380780504    
       16.04740000     1315.110307814745         6.921188176804736    
       16.05120000     1324.897232698329         6.994466903603247    
       16.05500000     1327.112592603375         6.983105081028526    
       16.05880000     1334.887547817668         6.964461994582590    
       16.06260000     1343.658390709094         6.987890538695813    
       16.06640000     1348.180697680150         7.015096106336663    
       16.07020000     1357.357207427903         7.057032741656593    
       16.07400000     1370.555756839345         7.116088256241043    
       16.07780000     1373.161128474359         7.133633321581643    
       16.08160000     1367.308826265085         7.081911410417631    
       16.08540000     1366.506577641710         7.125659574922760    
       16.08920000     1367.736577127336         7.065692973975744    
       16.09300000     1364.724232137419         7.060725788077494    
       16.09680000     1359.794493473779         7.072431239057111    
       16.10060000     1356.590205346930         7.079552611372701    
       16.10440000     1349.203452038775         7.049508704222490    
       16.10820000     1343.853721642588         7.048004581579744    
       16.11200000     1337.495322817054         7.005985635446673    
       16.11580000     1334.637060152368         7.040471998909337    
       16.11960000     1328.897086559902         6.982942160187038    
       16.12340000     1322.924856701194         6.925212474873580    
       16.12720000     1316.444792564985         6.928878485185013    
       16.13100000     1302.959659228618         6.858525987815684    
       16.13480000     1298.352358841015         6.832869191391453    
       16.13860000     1299.473355549516         7.369105590322544    
       16.14240000     1292.564661540784         6.784800727828546    
       16.14620000     1288.759830628624         6.032526538077289    
       16.15000000     1284.582625725018         5.827651939018812    
       16.15380000     1276.763655813691         5.833114390669746    
       16.15760000     1274.145789760416         5.831390009978499    
       16.16140000     1272.596991718384         5.825105779267225    
       16.16520000     1264.336772201446         5.806278589295846    
       16.16900000     1258.840459898763         5.783664231579922    
       16.17280000     1258.712583258809         5.782106346092750    
       16.17660000     1255.084987344885         5.758206138982485    
       16.18040000     1248.907859760291         5.745672916570788    
       16.18420000     1242.084478011551         5.748542519051960    
       16.18800000     1241.045975230052         5.774340894241506    
       16.19180000     1242.978303319772         5.727437613556996    
       16.19560000     1246.404131542846         5.721069390871960    
       16.19940000     1243.040085380201         5.719004395823162    
       16.20320000     1236.889701309173         5.693894902378826    
       16.20700000     1235.049229505376         5.692296636599860    
       16.21080000     1237.073283944508         5.713439470243918    
       16.21460000     1234.830679085143         5.719691874117055    
       16.21840000     1232.745285946043         5.716717610360082    
       16.22220000     1237.025834136131         5.719954855498785    
       16.22600000     1233.935287499891         5.665260021943699    
       16.22980000     1230.579750087952         5.689824792172645    
       16.23360000     1232.553771639781         5.696401312244935    
       16.23740000     1233.598562895153         5.682235422794998    
       16.24120000     1229.265758330619         5.666979154979295    
       16.24500000     1230.555970005046         5.666740280070953    
       16.24880000     1227.104231605674         5.685129495908264    
       16.25260000     1227.568407511736         5.642425353967820    
       16.25640000     1230.912465464455         5.696406047815247    
       16.26020000     1228.824763209542         5.678721899553883    
       16.26400000     1231.814227546603         5.700859536519273    
       16.26780000     1229.060702229001         5.665942610637204    
       16.27160000     1229.563025246517         5.665211802960417    
       16.27540000     1222.562013057698         5.680666707731532    
       16.27920000     1240.990076007514         5.730479840178139    
       16.28300000     1230.555071527819         5.679909022920472    
       16.28680000     1218.561677041183         5.639212751612464    
       16.29060000     1220.837005219558         5.615773185739957    
       16.29440000     1221.824042112887         5.703001955292942    
       16.29820000     1220.596018621317         5.638190734379189    
       16.30200000     1221.666310178530         5.680651875587717    
       16.30580000     1222.978336028117         5.654617219636818    
       16.30960000     1220.253744682200         5.613006287528540    
       16.31340000     1221.362427019008         5.653626611186533    
       16.31720000     1219.784558528000         5.657767312054645    
       16.32100000     1218.317619988230         5.647079506699860    
       16.32480000     1220.299925137135         5.674985886239165    
       16.32860000     1216.369368048732         5.579696587581999    
       16.33240000     1215.735922966827         5.639733369131954    
       16.33620000     1214.928909545855         5.629025187785693    
       16.34000000     1220.195796866683         5.621005030162676    
       16.34380000     1214.787325425958         5.610508685555042    
       16.34760000     1210.783565155810         5.638277744824679    
       16.35140000     1205.488025697136         5.608744880908093    
       16.35520000     1206.727960403666         5.592167477007466    
       16.35900000     1203.177685861294         5.538388860437378    
       16.36280000     1202.858975165349         5.541040844552236    
       16.36660000     1206.351986022330         5.577955591066821    
       16.37040000     1202.359726758131         5.535078027175492    
       16.37420000     1196.613642800359         5.542161223761206    
       16.37800000     1193.396945155136         5.552641500358749    
       16.38180000     1191.354389027057         5.523773678754384    
       16.38560000     1188.941463037141         5.533976634670785    
       16.38940000     1181.005700326675         5.455406521668164    
       16.39320000     1181.178955766405         5.464982559109803    
       16.39700000     1181.835062334438         5.490031512026880    
       16.40080000     1183.285821503601         5.504668274014803    
       16.40460000     1174.612785578196         5.459864558121644    
       16.40840000     1179.328340957649         5.492053074794191    
       16.41220000     1173.282773741123         5.463474920464833    
       16.41600000     1177.775226068274         5.525451813035036    
       16.41980000     1178.726019451708         5.502747581983806    
       16.42360000     1175.595750751341         5.468914720892473    
       16.42740000     1174.556743427499         5.461897612735498    
       16.43120000     1175.604384431232         5.474619222196280    
       16.43500000     1174.262833640442         5.485573941870195    
       16.43880000     1171.546549086075         5.478839778382060    
       16.44260000     1173.520880111333         5.474104805974589    
       16.44640000     1178.629535138120         5.479296236099175    
       16.45020000     1175.006536854455         5.479621471613595    
       16.45400000     1175.237440195135         5.501193680820774    
       16.45780000     1172.999067739298         5.502412268465430    
       16.46160000     1175.175437536344         5.475673886227989    
       16.46540000     1174.063706581619         5.474356028209646    
       16.46920000     1173.428128772360         5.489224655799381    
       16.47300000     1175.777120306160         5.498054735591746    
       16.47680000     1180.540615652682         5.492644661671991    
       16.48060000     1178.813200000284         5.519284718559240    
       16.48440000     1175.182793851189         5.513075410252999    
       16.48820000     1177.526270897860         5.549600256875373    
       16.49200000     1180.108069478095         5.509740198828609    
       16.49580000     1180.993753035368         5.504472502651202    
       16.49960000     1179.993816425674         5.517573664650630    
       16.50340000     1183.182363482861         5.510703397155566    
       16.50720000     1181.924231739349         5.499561493975570    
       16.51100000     1182.826952966085         5.518668835391176    
       16.51480000     1187.036422724756         5.520310566603293    
       16.51860000     1187.659988664290         5.539342154056466    
       16.52240000     1186.439451570732         5.537722815641462    
       16.52620000     1191.766725493858         5.514744182870476    
       16.53000000     1188.997457454656         5.534879290647373    
       16.53380000     1191.584256657750         5.551608194543653    
       16.53760000     1194.533775437050         5.536988142980668    
       16.54140000     1196.083093907828         5.550665407116417    
       16.54520000     1197.037422297809         5.558520722678974    
       16.54900000     1204.305919253970         5.597030049257872    
       16.55280000     1212.525556605113         5.601643323763841    
       16.55660000     1216.496761109113         5.632235734921649    
       16.56040000     1219.152781984905         5.627795637877429    
       16.56420000     1223.075670411077         5.686021590613434    
       16.56800000     1227.065609600933         5.676812452119139    
       16.57180000     1237.672741873847         5.724446401654184    
       16.57560000     1245.679740483449         5.758202976869701    
       16.57940000     1250.562414921609         5.777522407707609    
       16.58320000     1260.217467675777         5.776784689017747    
       16.58700000     1277.016680736040         5.861973051760110    
       16.59080000     1294.294910964610         5.878081432910792    
       16.59460000     1310.996571159386         6.041726825993360    
       16.59840000     1320.699972580852         6.009868028744708    
       16.60220000     1344.030224379439         6.151936263781452    
       16.60600000     1359.300517497381         6.155235669410718    
       16.60980000     1375.344936009793         6.181583705959058    
       16.61360000     1396.617486415569         6.259962379141192    
       16.61740000     1415.843550329285         6.375184623001806    
       16.62120000     1426.645601269166         6.401935055672942    
       16.62500000     1440.520329422302         6.461068981136463    
       16.62880000     1443.520999719655         6.419479005715719    
       16.63260000     1444.182134731701         6.511142028359026    
       16.63640000     1436.501171329396         6.469121274280782    
       16.64020000     1431.639762635708         6.403501141161858    
       16.64400000     1417.280944082942         6.344894653427597    
       16.64780000     1410.915810760333         6.344478270384293    
       16.65160000     1394.558267574453         6.304758569063501    
       16.65540000     1367.888907720069         6.174779292264344    
       16.65920000     1344.329040246409         6.068468519448944    
       16.66300000     1336.664135578701         6.038776779664484    
       16.66680000     1316.566508425732         6.008714529865562    
       16.67060000     1295.545653422935         5.877663651162167    
       16.67440000     1283.845363972284         5.853126808135531    
       16.67820000     1275.408587184847         5.858197182516583    
       16.68200000     1263.045694569712         5.797240363766059    
       16.68580000     1251.664879622059         5.782556950317488    
       16.68960000     1245.389246551764         5.684808323614322    
       16.69340000     1237.542655478372         5.674343603693599    
       16.69720000     1230.057598593158         5.686803651873808    
       16.70100000     1217.733793713620         5.627038444808104    
       16.70480000     1215.599889763295         5.615422508247382    
       16.70860000     1217.161727521150         5.616068567109039    
       16.71240000     1209.435252961017         5.602981304836059    
       16.71620000     1202.556275527065         5.614272357964714    
       16.72000000     1202.455849128110         5.593810357200295    
       16.72380000     1199.105798591064         5.568823853315560    
       16.72760000     1192.206158833913         5.520537533823152    
       16.73140000     1193.361344062697         5.545331675908733    
       16.73520000     1191.553098338954         5.551649843928296    
       16.73900000     1187.432808975166         5.518747030895826    
       16.74280000     1184.732707975410         5.494081090060822    
       16.74660000     1182.077117699774         5.481711458491902    
       16.75040000     1183.421677051210         5.504049124179668    
       16.75420000     1183.015108143635         5.545537971665427    
       16.75800000     1180.834612700887         5.546207920285778    
       16.76180000     1180.350293567480         5.500605387656679    
       16.76560000     1179.800806510741         5.493947021503433    
       16.76940000     1177.880285303024         5.500310197068535    
       16.77320000     1173.253563827805         5.494933661662897    
       16.77700000     1167.916512756999         5.470038505503140    
       16.78080000     1170.724955029129         5.499241282261261    
       16.78460000     1172.515467243470         5.490746650432643    
       16.78840000     1174.125060152572         5.507547685844128    
       16.79220000     1167.958569495931         5.475711353153464    
       16.79600000     1172.954073038688         5.477233770235740    
       16.79980000     1175.433936470049         5.501404688067933    
       16.80360000     1174.066460987335         5.477233886348558    
       16.80740000     1171.770329333610         5.459575770078812    
       16.81120000     1172.715410633457         5.482532888113962    
       16.81500000     1167.398778832572         5.435508338958807    
       16.81880000     1168.756736967914         5.468120530447675    
       16.82260000     1173.837636264876         5.492555587087582    
       16.82640000     1175.220448331763         5.460644306241266    
       16.83020000     1169.132253285289         5.491452971794024    
       16.83400000     1174.264138833925         5.479666955204804    
       16.83780000     1175.000995954241         5.469392422810335    
       16.84160000     1177.849362934164         5.472612636770763    
       16.84540000     1169.485944519460         5.453294373014762    
       16.84920000     1180.801744915073         5.514669165827919    
       16.85300000     1177.565195396142         5.477432470599982    
       16.85680000     1178.991259347577         5.503627531746385    
       16.86060000     1175.884694938637         5.483627177015268    
       16.86440000     1176.025504804874         5.502180585598231    
       16.86820000     1179.681520987791         5.495153764987943    
       16.87200000     1178.900583160680         5.489196058546701    
       16.87580000     1176.946791371714         5.491253017048553    
       16.87960000     1181.866054728682         5.539543548018548    
       16.88340000     1178.077929371600         5.498593562166983    
       16.88720000     1173.519205683753         5.477807813835859    
       16.89100000     1170.801822386826         5.419465801144354    
       16.89480000     1178.609529472821         5.533265504034897    
       16.89860000     1173.120495858298         5.480191547145233    
       16.90240000     1172.181553824101         5.507146699417303    
       16.90620000     1167.970666521652         5.463836360909832    
       16.91000000     1166.541565700013         5.438851883417284    
       16.91380000     1165.853867110575         5.421945120909742    
       16.91760000     1171.567391373284         5.472990135453603    
       16.92140000     1168.228280838972         5.473534388468007    
       16.92520000     1167.069209108167         5.468123180532884    
       16.92900000     1163.329182614546         5.420878250345869    
       16.93280000     1173.936822981889         5.517507083005947    
       16.93660000     1167.388207778891         5.488795149420046    
       16.94040000     1172.419436610715         5.460806041449421    
       16.94420000     1178.270838904102         5.502763979719671    
       16.94800000     1179.670585262069         5.523438597944065    
       16.95180000     1177.750811515792         5.516078922720331    
       16.95560000     1186.863012003415         5.522109226815665    
       16.95940000     1192.536505640895         5.531657547071777    
       16.96320000     1194.426320109535         5.565965783251953    
       16.96700000     1198.685297056814         5.603344082005398    
       16.97080000     1200.760701250035         5.572583996687532    
       16.97460000     1204.990163618797         5.601745504861115    
       16.97840000     1208.461639431835         5.624832648043067    
       16.98220000     1214.716953861960         5.658122170722796    
       16.98600000     1220.602100076219         5.706347050263832    
       16.98980000     1219.815995946336         5.651316088099778    
       16.99360000     1226.467127601150         5.682259229883395    
       16.99740000     1222.561199025301         5.693218226049699    
       17.00120000     1230.703848030360         5.652483047301276    
       17.00500000     1230.448516994812         5.679759445552497    
       17.00880000     1229.670838886022         5.675909741532577    
       17.01260000     1223.839526054950         5.689303925904688    
       17.01640000     1224.817606380711         5.696238365469506    
       17.02020000     1216.627056571020         5.659919434648838    
       17.02400000     1218.213776663725         5.651590099116637    
       17.02780000     1213.378504599902         5.624478984716262    
       17.03160000     1214.725978315888         5.635706552201903    
       17.03540000     1216.298515607024         5.684257355284201    
       17.03920000     1213.273565341601         5.638547494532977    
       17.04300000     1210.783798536387         5.605140181588861    
       17.04680000     1198.649839718488         5.560407273604731    
       17.05060000     1195.187649540066         5.544806983343885    
       17.05440000     1199.455566423834         5.616925290135855    
       17.05820000     1198.540338754867         5.612817883267762    
       17.06200000     1199.395995758792         5.623590153878131    
       17.06580000     1199.143300465159         5.610118882821509    
       17.06960000     1201.831595033487         5.596455297213015    
       17.07340000     1194.201747760841         5.575044587734000    
       17.07720000     1196.775719785468         5.595202480347228    
       17.08100000     1197.447816553680         5.601800438956593    
       17.08480000     1200.225000041656         5.613475626825685    
       17.08860000     1204.728705862259         5.638521213121876    
       17.09240000     1204.466915491898         5.643261974959439    
       17.09620000     1208.320129940500         5.636750725871996    
       17.10000000     1206.854429734290         5.615672172787515    
       17.10380000     1205.852254223185         5.590568521702219    
       17.10760000     1210.605462591543         5.608639168320553    
       17.11140000     1207.117054727306         5.605363197669289    
       17.11520000     1204.996070104979         5.558906632213549    
       17.11900000     1211.189846987065         5.620272237802276    
       17.12280000     1211.205656786850         5.628314487574363    
       17.12660000     1214.677342461822         5.641769294707949    
       17.13040000     1216.877291170980         5.664964822815152    
       17.13420000     1216.466798670842         5.654540565705054    
       17.13800000     1222.961475882119         5.635586210051856    
       17.14180000     1222.871875675841         5.651168896043315    
       17.14560000     1222.575091001792         5.652463617232114    
       17.14940000     1217.036795646565         5.665296265980526    
       17.15320000     1220.248614825245         5.645307699098323    
       17.15700000     1223.312317171207         5.680180820834948    
       17.16080000     1216.390420934810         5.675199706738186    
       17.16460000     1215.969128578926         5.689770211940495    
       17.16840000     1213.958324091041         5.651436180852739    
       17.17220000     1212.252161510266         5.641669759677550    
       17.17600000     1207.765678318848         5.614432447421661    
       17.17980000     1202.613050970837         5.596683496514081    
       17.18360000     1199.924781726284         5.589424405403229    
       17.18740000     1193.775367318017         5.565986376177878    
       17.19120000     1184.733057650626         5.468330158600194    
       17.19500000     1186.924481750282         5.528416474281205    
       17.19880000     1174.765635458817         5.473656908836219    
       17.20260000     1168.223620736398         5.472145112198861    
       17.20640000     1161.219936192463         5.454203690716985    
       17.21020000     1155.585417587773         5.403095372417773    
       17.21400000     1149.602091335642         5.338074475382102    
       17.21780000     1144.806734902518         5.350398536385662    
       17.22160000     1136.655791597658         5.356891429827903    
       17.22540000     1139.186502205262         5.397732442696191    
       17.22920000     1136.398967538190         5.359627634168682    
       17.23300000     1132.330999915010         5.380149020865853    
       17.23680000     1128.839612485054         5.346508363991001    
       17.24060000     1122.535623768256         5.285089377564221    
       17.24440000     1114.688328750703         5.259981293673877    
       17.24820000     1121.502260592736         5.304992295378659    
       17.25200000     1111.120449497855         5.275954425475421    
       17.25580000     1110.371321535920         5.255846357649259    
       17.25960000     1109.607343468624         5.247873854703611    
       17.26340000     1110.373390392149         5.248628741373611    
       17.26720000     1101.380194786412         5.257276893390666    
       17.27100000     1098.089079947051         5.216965150880689    
       17.27480000     1093.190912875697         5.197338846918375    
       17.27860000     1102.051951244581         5.247598400075872    
       17.28240000     1098.465284024737         5.237775851369987    
       17.28620000     1100.676771445407         5.275063579119293    
       17.29000000     1100.715153026823         5.242290075696237    
       17.29380000     1097.389743833267         5.243758817636401    
       17.29760000     1094.082806002298         5.207149487607967    
       17.30140000     1093.669485042217         5.173255221751865    
       17.30520000     1093.201969085920         5.194247463662880    
       17.30900000     1091.327266256394         5.175535582257137    
       17.31280000     1092.127574787339         5.202151289986165    
       17.31660000     1090.993167176653         5.194087427577817    
       17.32040000     1093.855514102501         5.213921733154018    
       17.32420000     1093.225572400615         5.181108183792119    
       17.32800000     1087.171204662468         5.144101287724729    
       17.33180000     1088.854390467158         5.161710529769423    
       17.33560000     1093.235657313946         5.242395834959100    
       17.33940000     1093.951656801105         5.202037399596332    
       17.34320000     1088.383206428077         5.177563564609684    
       17.34700000     1092.208779757483         5.167308727059985    
       17.35080000     1089.220968247998         5.158557323444573    
       17.35460000     1094.577009293913         5.242529093043883    
       17.35840000     1087.797536262570         5.200101450639700    
       17.36220000     1089.962523625125         5.225216775762264    
       17.36600000     1088.417641189707         5.217978498723288    
       17.36980000     1091.212938315672         5.193403604707633    
       17.37360000     1091.239300702160         5.204806626627891    
       17.37740000     1087.156138526660         5.187039926631287    
       17.38120000     1084.786746714165         5.191014863972645    
       17.38500000     1092.849126320656         5.201027518822366    
       17.38880000     1091.816621142109         5.205716737680479    
       17.39260000     1086.207862847798         5.189786632690376    
       17.39640000     1086.165986756592         5.184682464710150    
       17.40020000     1093.063775547937         5.204543825672956    
       17.40400000     1089.950973227232         5.177554606123447    
       17.40780000     1091.535411301325         5.179941322535296    
       17.41160000     1088.979546930974         5.171072896777548    
       17.41540000     1084.414362854146         5.133455481553045    
       17.41920000     1088.433356842070         5.157262007832908    
       17.42300000     1093.304772076342         5.183892665791210    
       17.42680000     1096.181029429122         5.235884043843811    
       17.43060000     1093.383627035068         5.217861852598414    
       17.43440000     1090.404169761180         5.200311527372149    
       17.43820000     1093.704297257937         5.176823592522550    
       17.44200000     1094.592082287253         5.174440180496094    
       17.44580000     1096.915284028841         5.224869525049328    
       17.44960000     1100.827322952060         5.244868325353590    
       17.45340000     1097.023744577189         5.209670233517134    
       17.45720000     1098.802243653204         5.225897220497040    
       17.46100000     1106.725290551971         5.278972890297695    
       17.46480000     1108.399330642539         5.284919480101400    
       17.46860000     1106.236947538750         5.254402517906106    
       17.47240000     1110.878913044367         5.284763630652053    
       17.47620000     1115.773939602262         5.286568370505051    
       17.48000000     1120.028399835270         5.308912941645865    
       17.48380000     1124.477260104765         5.319037842811944    
       17.48760000     1124.291037761328         5.292181399568211    
       17.49140000     1131.720484436858         5.306694218481684    
       17.49520000     1134.864519864185         5.344179302377151    
       17.49900000     1138.683482952692         5.331657774884778    
       17.50280000     1143.493709711497         5.404757683543378    
       17.50660000     1149.105726391515         5.427094821183570    
       17.51040000     1148.793672981349         5.396788549739961    
       17.51420000     1149.459539608139         5.357391034974446    
       17.51800000     1151.234639254840         5.379629981517461    
       17.52180000     1152.438711848783         5.403664483056108    
       17.52560000     1161.527736222846         5.461686282112537    
       17.52940000     1156.002762664097         5.446084425782669    
       17.53320000     1154.436057759804         5.458858088081369    
       17.53700000     1154.729763476774         5.453043878611947    
       17.54080000     1152.757716194910         5.415404957688917    
       17.54460000     1150.371859899907         5.388097518848074    
       17.54840000     1156.799760043153         5.400829857604365    
       17.55220000     1148.747950445368         5.418887487684835    
       17.55600000     1146.970934867061         5.409814982382240    
       17.55980000     1141.881482096389         5.393109179970927    
       17.56360000     1141.892985925870         5.396264990930339    
       17.56740000     1140.672703958664         5.408523996003557    
       17.57120000     1142.383612092036         5.401984852795569    
       17.57500000     1144.143327418097         5.403009633159509    
       17.57880000     1140.365321811087         5.385388052749939    
       17.58260000     1143.665757434793         5.426904590066229    
       17.58640000     1147.205723347508         5.453270776535147    
       17.59020000     1134.570456389308         5.381882673975856    
       17.59400000     1140.105868644816         5.401798575056296    
       17.59780000     1138.881043166442         5.382360218538190    
       17.60160000     1147.203782705517         5.381799756537803    
       17.60540000     1155.598373400710         5.453619816769820    
       17.60920000     1151.062795872366         5.413371947344234    
       17.61300000     1152.392707198065         5.441193436521605    
       17.61680000     1161.498607440888         5.453013219514985    
       17.62060000     1169.092748208964         5.499793469629754    
       17.62440000     1167.605471309166         5.468207064348679    
       17.62820000     1175.943340172084         5.490752202794675    
       17.63200000     1179.488234698891         5.499758838598505    
       17.63580000     1187.002822034656         5.582505735184473    
       17.63960000     1194.281604963858         5.562318958554982    
       17.64340000     1202.994343930038         5.607746193931643    
       17.64720000     1208.929983000988         5.626368441612297    
       17.65100000     1221.640434751240         5.647028996741737    
       17.65480000     1236.270165259795         5.763535273415230    
       17.65860000     1241.520041154164         5.757185196716612    
       17.66240000     1258.594696749530         5.840833785916316    
       17.66620000     1266.525332537761         5.853662977173877    
       17.67000000     1278.239139947675         5.876890013515694    
       17.67380000     1282.953888479151         5.920290001316957    
       17.67760000     1299.880984971472         5.959955677399172    
       17.68140000     1298.813256175494         5.980926550013715    
       17.68520000     1301.202938780023         5.942390515337410    
       17.68900000     1308.734169067849         5.981068179592317    
       17.69280000     1306.980737163706         5.995909645976788    
       17.69660000     1306.146305054578         5.983795362510732    
       17.70040000     1296.758383165813         5.934783061408770    
       17.70420000     1292.210360600297         5.898446785832369    
       17.70800000     1285.115205303123         5.885528774166319    
       17.71180000     1262.764322213961         5.778919818190063    
       17.71560000     1257.491274651096         5.788909478934427    
       17.71940000     1243.787765543445         5.721246415524137    
       17.72320000     1240.706377250084         5.722081042436771    
       17.72700000     1230.262252177121         5.712596015339400    
       17.73080000     1210.833149232719         5.651162511106300    
       17.73460000     1203.894058977083         5.609710571000194    
       17.73840000     1194.834944824014         5.578128580862683    
       17.74220000     1186.096485641643         5.507236480178704    
       17.74600000     1182.513495018373         5.535775412862940    
       17.74980000     1170.760663178081         5.492557552851790    
       17.75360000     1166.723060696409         5.463161120144260    
       17.75740000     1158.849582439175         5.454063831469411    
       17.76120000     1153.377500698708         5.464710437563789    
       17.76500000     1146.688115649411         5.405929834680916    
       17.76880000     1144.778658605344         5.397756316976712    
       17.77260000     1144.517462324437         5.410293456386450    
       17.77640000     1136.311022542380         5.355369269425408    
       17.78020000     1132.691145102608         5.355525556693435    
       17.78400000     1132.424271173136         5.362116177017082    
       17.78780000     1133.808715787855         5.323305509334495    
       17.79160000     1133.248235362539         5.326941831288799    
       17.79540000     1127.342765935774         5.314547109097115    
       17.79920000     1127.289868969244         5.298309045712880    
       17.80300000     1128.779916389700         5.326685470440912    
       17.80680000     1129.637464772956         5.339982917059504    
       17.81060000     1126.663259684236         5.330523625606343    
       17.81440000     1126.113351131732         5.296207280012789    
       17.81820000     1121.762950018025         5.271336661393766    
       17.82200000     1120.083201777230         5.312830199163543    
       17.82580000     1120.586672009658         5.304018214698530    
       17.82960000     1116.254161749441         5.287158102164274    
       17.83340000     1116.406034311882         5.283293235565099    
       17.83720000     1112.370008481864         5.275970321206609    
       17.84100000     1108.530627007371         5.214035341092792    
       17.84480000     1100.933169092861         5.203165346080541    
       17.84860000     1098.309726311182         5.202863635238815    
       17.85240000     1095.865462452684         5.216002689342960    
       17.85620000     1093.690296161042         5.210595157916500    
       17.86000000     1092.015727676664         5.196360160332909    
       17.86380000     1092.914222868687         5.217184496140879    
       17.86760000     1094.341259438223         5.245746220169089    
       17.87140000     1087.800371585034         5.215597554436795    
       17.87520000     1089.007293795001         5.220324032318668    
       17.87900000     1087.687870833221         5.204203524197470    
       17.88280000     1084.519888240439         5.201571837141847    
       17.88660000     1088.519164718286         5.232202297216815    
       17.89040000     1086.667020405661         5.221490629689445    
       17.89420000     1086.602892443427         5.201449599544596    
       17.89800000     1086.295458566320         5.165293930621596    
       17.90180000     1088.415735471715         5.180391605572921    
       17.90560000     1086.818342145534         5.198226081340774    
       17.90940000     1089.037542259044         5.189349744125477    
       17.91320000     1086.128136950616         5.177230200884743    
       17.91700000     1089.885502604162         5.190266676009816    
       17.92080000     1088.461356958961         5.207445656472071    
       17.92460000     1090.734733605843         5.188058530368223    
       17.92840000     1093.315235374498         5.194522102317229    
       17.93220000     1091.874256610556         5.175949519938828    
       17.93600000     1085.968364970184         5.196396774314411    
       17.93980000     1086.497493561776         5.177910682714475    
       17.94360000     1088.618386147801         5.217647315715324    
       17.94740000     1089.669543203600         5.201979367614705    
       17.95120000     1086.941166909387         5.168995237823243    
       17.95500000     1090.674446799714         5.221494052103031    
       17.95880000     1084.254569361256         5.178162223231404    
       17.96260000     1085.112879493581         5.185767736424403    
       17.96640000     1074.437283859846         5.152342550999246    
       17.97020000     1071.101324239587         5.128862796734044    
       17.97400000     1062.027589287989         5.110697032812867    
       17.97780000     1062.547604716764         5.091942412860220    
       17.98160000     1061.074495646508         5.104276687296662    
       17.98540000     1053.384621761080         5.061690849116540    
       17.98920000     1055.831434977903         5.068493912837752    
       17.99300000     1056.159765506336         5.062002897241121    
       17.99680000     1058.960791174509         5.060518244841177    
       18.00060000     1051.008130233679         5.013936496780629    
       18.00440000     1043.346976054528         4.986687186237444    
       18.00820000     1041.949001577583         4.990932595320730    
       18.01200000     1038.656944427574         4.993946799243851    
       18.01580000     1040.194222690715         4.994923415924702    
       18.01960000     1037.922556564539         4.978143521743439    
       18.02340000     1033.461930870880         4.952114177087026    
       18.02720000     1035.368269340030         4.982918881216852    
       18.03100000     1023.508846862705         4.948623377164712    
       18.03480000     1027.470089181771         4.966322707915827    
       18.03860000     1028.715653496242         4.979455375554794    
       18.04240000     1023.090264113733         4.918786700516857    
       18.04620000     1022.977360003806         4.962025160172454    
       18.05000000     1022.383799376607         4.944919398431189    
       18.05380000     1022.924569926148         4.941228007406778    
       18.05760000     1027.992445619102         4.988116744774154    
       18.06140000     1027.363299532342         4.989380390360388    
       18.06520000     1019.265723163130         4.956563221171030    
       18.06900000     1025.290097930231         4.966223358304944    
       18.07280000     1025.248718714815         4.972934097856335    
       18.07660000     1020.366451296028         4.940322186760847    
       18.08040000     1021.403466968498         4.945737096446988    
       18.08420000     1020.654234869210         4.948308356747208    
       18.08800000     1021.351724727200         4.915687740487175    
       18.09180000     1020.309200375542         4.935065302346510    
       18.09560000     1018.268068327754         4.923021649509716    
       18.09940000     1016.850793706669         4.915078221482135    
       18.10320000     1018.016432917009         4.916726544155233    
       18.10700000     1019.171923811872         4.929022793248423    
       18.11080000     1018.442899239995         4.926133790765548    
       18.11460000     1016.752060275628         4.905355930026708    
       18.11840000     1024.757837762260         4.913932308164461    
       18.12220000     1023.952796061570         4.952375938607256    
       18.12600000     1015.953787961433         4.909338653534997    
       18.12980000     1016.414535908209         4.929199742585660    
       18.13360000     1021.952797688056         4.925084914784777    
       18.13740000     1016.903323738238         4.896971937723753    
       18.14120000     1020.864031741128         4.894962605523916    
       18.14500000     1021.963135489850         4.915178964970941    
       18.14880000     1027.649774564096         4.950564556369488    
       18.15260000     1026.795089205232         4.962435557459124    
       18.15640000     1022.901816482872         4.955066094392635    
       18.16020000     1022.715248618923         4.939228967889743    
       18.16400000     1030.952069176467         4.966489642233575    
       18.16780000     1032.284389629249         5.001675982999263    
       18.17160000     1031.910057247545         4.982411366165985    
       18.17540000     1036.823956530765         5.001760152472690    
       18.17920000     1037.731392924492         4.995944347201063    
       18.18300000     1036.609601279653         5.012730998012376    
       18.18680000     1044.494521049104         5.044920747416445    
       18.19060000     1041.829102233869         5.044847748581908    
       18.19440000     1042.330894468265         5.018488980942916    
       18.19820000     1043.374737660181         4.992946273246019    
       18.20200000     1045.057685591786         5.033243514984863    
       18.20580000     1046.816977471813         5.036636162619874    
       18.20960000     1050.923315101436         5.037393155866931    
       18.21340000     1050.643502874798         5.044308355799055    
       18.21720000     1055.274889076516         5.058882374275679    
       18.22100000     1056.573878145944         5.092342776626009    
       18.22480000     1056.122302791575         5.051913337780254    
       18.22860000     1058.132617453930         5.039438171818144    
       18.23240000     1056.176303703329         5.048128776934652    
       18.23620000     1051.016964678829         5.047803211630497    
       18.24000000     1048.386890166504         5.037143302590882    
       18.24380000     1052.229725679975         5.075992908924780    
       18.24760000     1052.077724992657         5.054041620718588    
       18.25140000     1052.985769739735         5.051053634372592    
       18.25520000     1047.729408539504         5.040003220871382    
       18.25900000     1041.746119988785         4.994345579781879    
       18.26280000     1047.024120877570         5.064471810681149    
       18.26660000     1040.375277905666         5.001238337784004    
       18.27040000     1037.176181620361         4.995401332894635    
       18.27420000     1039.404131813247         5.034249672336061    
       18.27800000     1035.509149266054         4.993047977341442    
       18.28180000     1028.527546508118         4.976035880907111    
       18.28560000     1031.191692612540         4.969626768795171    
       18.28940000     1025.706337822852         4.948473302439298    
       18.29320000     1027.018286814811         4.937640392503088    
       18.29700000     1020.146389503073         4.900237881832282    
       18.30080000     1021.339489390921         4.894150559697981    
       18.30460000     1023.003983361706         4.907741758573020    
       18.30840000     1024.460213826791         4.921370087699376    
       18.31220000     1020.312819221657         4.903092688867958    
       18.31600000     1015.618352896805         4.905284464843960    
       18.31980000     1018.288349922297         4.911929192851919    
       18.32360000     1012.738290558487         4.900963880994762    
       18.32740000     1011.367071519352         4.887501744649013    
       18.33120000     1013.392442548438         4.909225933358676    
       18.33500000     1013.017990825174         4.916109366010948    
       18.33880000     1013.232577239695         4.916215331685434    
       18.34260000     1009.193336933842         4.881924091956881    
       18.34640000     1006.127560530909         4.884160615260419    
       18.35020000     1004.608667875969         4.857696540887554    
       18.35400000     1009.128112941488         4.883754815118068    
       18.35780000     1004.260383790739         4.877091384328210    
       18.36160000     1005.713995475181         4.889194664611095    
       18.36540000     1005.827475297773         4.882556454661357    
       18.36920000     1007.131873954350         4.891435778081910    
       18.37300000     1010.095308041749         4.920055624965022    
       18.37680000     1001.687048641333         4.860747630416024    
       18.38060000     1005.000008857798         4.882644479444425    
       18.38440000     1000.730647604602         4.884024080132429    
       18.38820000     1003.995641281732         4.838765918551445    
       18.39200000     1003.323545036306         4.871638723124337    
       18.39580000     1002.091148591998         4.882412296584123    
       18.39960000     1001.049933728400         4.876237120987454    
       18.40340000     1003.783853927156         4.868003216795655    
       18.40720000     1005.720597076684         4.888667037996384    
       18.41100000     1005.754465755467         4.893746473482901    
       18.41480000     1001.952038533867         4.863409313765174    
       18.41860000     1001.478987714966         4.833123368613068    
       18.42240000     1001.032529141906         4.863383190995894    
       18.42620000     1006.466951247510         4.868966336156674    
       18.43000000     1007.428438727982         4.916725927285544    
       18.43380000     999.8894769812390         4.859703243600906    
       18.43760000     1002.334145735625         4.822083351230927    
       18.44140000     1005.093809310157         4.855274219251793    
       18.44520000     1006.076073831309         4.870497662790278    
       18.44900000     1004.505390555704         4.861098608505121    
       18.45280000     1002.951217948041         4.859987966799267    
       18.45660000     1005.707531033813         4.874971332648685    
       18.46040000     1005.920201778133         4.886169275261220    
       18.46420000     1005.422178932446         4.886010746679801    
       18.46800000     1010.975817411659         4.936155078387745    
       18.47180000     1014.331341029909         4.912219774746545    
       18.47560000     1012.742453567100         4.899904505572960    
       18.47940000     1010.873576248840         4.887594610145943    
       18.48320000     1012.820036476586         4.948771003969218    
       18.48700000     1010.597816074418         4.921410981716316    
       18.49080000     1011.600244614090         4.910387272895981    
       18.49460000     1009.125161031479         4.873803070148498    
       18.49840000     1012.253218719305         4.892085969196270    
       18.50220000     1015.404906885316         4.909014099854158    
       18.50600000     1015.132283254761         4.906540253816054    
       18.50980000     1011.210749175237         4.884154148887788    
       18.51360000     1009.849069856081         4.885552003424465    
       18.51740000     1010.622267187148         4.893913572260293    
       18.52120000     1014.212325316734         4.933518750257357    
       18.52500000     1010.222553585178         4.903860142191621    
       18.52880000     1013.487178393068         4.906881609196948    
       18.53260000     1010.374742187023         4.881062608137907    
       18.53640000     1006.416663491183         4.860012366419893    
       18.54020000     1009.620338447475         4.902345564258375    
       18.54400000     1005.139022695147         4.897920851299236    
       18.54780000     1005.443538281565         4.906289038225220    
       18.55160000     1006.499659294719         4.880020626030269    
       18.55540000     1001.256295602147         4.857924443609249    
       18.55920000     998.6306010994617         4.816373894349305    
       18.56300000     1001.268603533557         4.847919011219479    
       18.56680000     999.4228053132646         4.833143904395314    
       18.57060000     1000.059690156664         4.837418271615350    
       18.57440000     1001.181081362095         4.869326593661294    
       18.57820000     1001.684722395020         4.855910980629160    
       18.58200000     995.6777508563486         4.856025753821528    
       18.58580000     996.1667133152034         4.848401228534053    
       18.58960000     998.0670520323115         4.857999929767883    
       18.59340000     999.2564004148026         4.856357656812937    
       18.59720000     993.0967505082558         4.807088643022949    
       18.60100000     991.0705919238636         4.776613815849237    
       18.60480000     1005.646849937572         4.833351075129162    
       18.60860000     1001.522765799861         4.858813289768108    
       18.61240000     995.9261304344810         4.841281460606576    
       18.61620000     999.7164926530894         4.842120553802525    
       18.62000000     1001.471177071616         4.860646510159194    
       18.62380000     1004.451325266218         4.869072846509736    
       18.62760000     999.2560578280904         4.834582754394988    
       18.63140000     1001.547478124690         4.876793638358375    
       18.63520000     1010.933801620694         4.915873735572619    
       18.63900000     1016.067815985199         4.929780157774229    
       18.64280000     1010.937854606948         4.878998323302397    
       18.64660000     1017.700679401308         4.903351253788949    
       18.65040000     1014.215602848955         4.876872019221708    
       18.65420000     1025.349749423982         4.935073147573602    
       18.65800000     1026.148527989530         4.952514109619981    
       18.66180000     1030.142615124127         4.945292017919330    
       18.66560000     1038.496466638589         5.008169479344386    
       18.66940000     1038.216805798776         5.004407223151677    
       18.67320000     1042.850742719832         5.032552122798428    
       18.67700000     1042.780590935625         5.015355952200523    
       18.68080000     1045.589045838571         5.036977043849993    
       18.68460000     1049.650154680587         5.045947403927771    
       18.68840000     1057.164392255494         5.043973189231713    
       18.69220000     1050.508363337686         5.042934389167678    
       18.69600000     1053.841788751273         5.055134596125643    
       18.69980000     1051.811931824380         5.055199336198787    
       18.70360000     1050.051732319841         5.020287465286716    
       18.70740000     1059.787459452671         5.082728712293731    
       18.71120000     1051.633761211181         5.055095505200943    
       18.71500000     1047.685006478797         5.026053208919707    
       18.71880000     1036.108831277242         4.963037471283022    
       18.72260000     1041.848029851820         5.024743093329971    
       18.72640000     1030.607759348546         4.963434851664002    
       18.73020000     1031.692620778165         4.999360428397343    
       18.73400000     1023.311308220426         4.938865457837127    
       18.73780000     1015.856909096040         4.872872044791793    
       18.74160000     1011.587603416613         4.891026428371819    
       18.74540000     1004.276598217317         4.886027243211077    
       18.74920000     1003.339231644904         4.877276841596599    
       18.75300000     1000.343505850704         4.845840103517554    
       18.75680000     996.2265126275045         4.822440639906141    
       18.76060000     1000.014152679896         4.853500128079210    
       18.76440000     990.1086021353216         4.841816679145911    
       18.76820000     991.1043581179798         4.859385797135883    
       18.77200000     991.7386597911759         4.831422417247122    
       18.77580000     984.7548235294429         4.787058321670584    
       18.77960000     983.5992497565042         4.766897889294993    
       18.78340000     981.9377591961543         4.804515422550446    
       18.78720000     973.3701619743257         4.769036688889148    
       18.79100000     978.2383866272738         4.786023564245508    
       18.79480000     975.7549982972731         4.742778012685434    
       18.79860000     971.7349289556056         4.748304329516582    
       18.80240000     969.4807667722124         4.732140909710436    
       18.80620000     966.9207992526694         4.728491669107804    
       18.81000000     967.1458971149275         4.702441934694766    
       18.81380000     964.7259049676710         4.714134942792302    
       18.81760000     967.1065971849101         4.745377861968629    
       18.82140000     968.6299984213774         4.756078133996319    
       18.82520000     963.0336886340708         4.710040315857166    
       18.82900000     968.4500081055531         4.740683368638360    
       18.83280000     964.4757910527438         4.712917705387490    
       18.83660000     960.2043798125502         4.683925954400467    
       18.84040000     957.3452707931181         4.698857928763934    
       18.84420000     961.0283420874524         4.727367713169306    
       18.84800000     961.4505509842741         4.728196785642833    
       18.85180000     964.0345063476319         4.725159950916735    
       18.85560000     962.4090872765902         4.707380939714136    
       18.85940000     961.0591560807522         4.691983815839985    
       18.86320000     961.9765787089997         4.713295494162766    
       18.86700000     963.6453438460617         4.711956433659513    
       18.87080000     961.7961118328150         4.702735607418878    
       18.87460000     968.4679974546621         4.751728482672736    
       18.87840000     969.5539019685529         4.724721290941549    
       18.88220000     966.7262038996187         4.736699434646496    
       18.88600000     963.6163777168282         4.751598350537288    
       18.88980000     965.8487495910719         4.741857721695323    
       18.89360000     968.2755713622605         4.743679715569424    
       18.89740000     965.8865308390642         4.725496462981961    
       18.90120000     966.9999496692254         4.689416932173854    
       18.90500000     965.8515480552434         4.690183919302476    
       18.90880000     967.2401857069389         4.747936185099265    
       18.91260000     967.1965425071232         4.763772691118739    
       18.91640000     973.8819386337153         4.741118847896113    
       18.92020000     975.3304106395217         4.757299126022341    
       18.92400000     975.8219044773676         4.751352955339654    
       18.92780000     976.4310394902842         4.757251125251859    
       18.93160000     977.7978377743565         4.785419413246266    
       18.93540000     981.6162900356916         4.806699430577970    
       18.93920000     989.3906121711115         4.818298588934829    
       18.94300000     997.2755144683267         4.843832675462858    
       18.94680000     1000.157845896879         4.856102545285558    
       18.95060000     998.9605372159801         4.825917097245231    
       18.95440000     1003.060261227819         4.858805301339634    
       18.95820000     1006.027064740870         4.879341097301964    
       18.96200000     1013.774120389050         4.890418563768361    
       18.96580000     1016.675523471348         4.914800913368556    
       18.96960000     1022.538800945469         4.945405049671429    
       18.97340000     1026.181615397957         4.973012392649456    
       18.97720000     1034.820443542754         4.977565642235493    
       18.98100000     1042.692963753707         5.016810288557483    
       18.98480000     1049.788631023919         5.047831139028750    
       18.98860000     1056.602638285555         5.050643885049444    
       18.99240000     1057.956930153476         5.087061157822841    
       18.99620000     1059.404757580007         5.077269986238474    
       19.00000000     1064.719179992693         5.109017665551192    
       19.00380000     1068.137877656660         5.099228823651216    
       19.00760000     1071.232642772413         5.137715595160616    
       19.01140000     1069.037371479239         5.121005889623424    
       19.01520000     1067.749868957488         5.092423469432831    
       19.01900000     1062.458980052616         5.063964926605226    
       19.02280000     1059.048590602074         5.094452823866040    
       19.02660000     1043.441606312070         5.048096539395566    
       19.03040000     1042.244785362820         5.070275980665072    
       19.03420000     1031.974492951104         5.001477590059761    
       19.03800000     1022.211080989283         4.904550395048493    
       19.04180000     1014.731401848037         4.934501603858807    
       19.04560000     1009.442634412132         4.911796348989182    
       19.04940000     996.2370148962780         4.849251002452326    
       19.05320000     995.2664447518171         4.825821088758427    
       19.05700000     989.5977459598048         4.809973376110820    
       19.06080000     984.5518946932277         4.822638896177923    
       19.06460000     979.4259968418946         4.803392163455885    
       19.06840000     975.7201256433896         4.802708103240612    
       19.07220000     978.7398793391195         4.761181912668562    
       19.07600000     963.2537760220387         4.712942530706080    
       19.07980000     959.0935326186316         4.684558032902818    
       19.08360000     961.3475622015532         4.705422308759949    
       19.08740000     959.8664209409654         4.708763043763089    
       19.09120000     957.2376801567794         4.690887745462865    
       19.09500000     952.7066422696735         4.654326734158452    
       19.09880000     956.8454385898959         4.700318014343970    
       19.10260000     951.7169492055973         4.683286140130830    
       19.10640000     946.8826011791666         4.634966918838026    
       19.11020000     952.5468677631698         4.657385213907952    
       19.11400000     947.4879779246115         4.653936380913132    
       19.11780000     949.8210916217889         4.698505169611549    
       19.12160000     953.6421768990319         4.683813828642926    
       19.12540000     950.3757720180677         4.665819170735650    
       19.12920000     949.8910281011231         4.652257292830413    
       19.13300000     955.3524782887605         4.669918743385488    
       19.13680000     945.0556507881846         4.630870355661970    
       19.14060000     945.5050847278740         4.629217718510361    
       19.14440000     951.8933059591160         4.683337995569369    
       19.14820000     946.4498428577658         4.652723261314944    
       19.15200000     946.4495335075960         4.655334728366130    
       19.15580000     943.3761614476468         4.634276551310818    
       19.15960000     943.2332693591841         4.611369860536414    
       19.16340000     945.5524809686685         4.633844334670882    
       19.16720000     947.4500290727929         4.637682276096185    
       19.17100000     949.3536640945332         4.648625995806981    
       19.17480000     949.2940438458048         4.658078603989033    
       19.17860000     945.5378617116204         4.623575521460319    
       19.18240000     948.5615280051821         4.651069506963988    
       19.18620000     942.7568862062335         4.653093711983987    
       19.19000000     949.6932003297642         4.675732731642707    
       19.19380000     949.3948350350644         4.666450180655796    
       19.19760000     943.5439604465125         4.638719672633060    
       19.20140000     948.5377922570628         4.638370205957382    
       19.20520000     948.8923699588667         4.633367165603415    
       19.20900000     945.0877636315458         4.663787235066501    
       19.21280000     941.2552230723657         4.645520164560770    
       19.21660000     939.9929591413261         4.609506839700950    
       19.22040000     934.2947655867180         4.586347663652139    
       19.22420000     933.6652186237491         4.595870582224755    
       19.22800000     931.1784477457127         4.590279483035531    
       19.23180000     930.5487045716044         4.598736870309065    
       19.23560000     931.1397053080287         4.597582385475627    
       19.23940000     932.2042143955586         4.576455162265261    
       19.24320000     925.2451814923356         4.562016644324411    
       19.24700000     929.0895861517448         4.581715907924203    
       19.25080000     924.0837277516531         4.550411229765176    
       19.25460000     924.9661421322801         4.550042078040447    
       19.25840000     922.3941163918961         4.535745992311487    
       19.26220000     920.2189999238193         4.533647362797429    
       19.26600000     920.3842130790333         4.544759542491292    
       19.26980000     911.3605486267406         4.517750513975125    
       19.27360000     913.9171655688764         4.536995026823008    
       19.27740000     916.5727595904547         4.518983663489795    
       19.28120000     915.2932634486639         4.516239624886574    
       19.28500000     918.1530575669561         4.532314401201567    
       19.28880000     920.9957602592378         4.534314326052046    
       19.29260000     913.6280591928186         4.518963908365185    
       19.29640000     915.9359068303364         4.524660501228031    
       19.30020000     919.3018832476384         4.554794090056049    
       19.30400000     911.1634394862579         4.512529607107503    
       19.30780000     916.7769993307666         4.553003865386598    
       19.31160000     917.5106687592496         4.546710675454718    
       19.31540000     919.7360942723332         4.525232640019555    
       19.31920000     920.3402725491928         4.535450697078449    
       19.32300000     919.7458731630586         4.565212748189055    
       19.32680000     921.7775832482608         4.573512389626484    
       19.33060000     922.4143740940754         4.591828384936912    
       19.33440000     918.9382028866304         4.568329107913075    
       19.33820000     916.9225182966946         4.521794689144748    
       19.34200000     919.3582960079885         4.565501494090462    
       19.34580000     920.7185255637590         4.570634348505491    
       19.34960000     925.5021924371732         4.575207849446764    
       19.35340000     921.4020350519902         4.552759699788814    
       19.35720000     924.3363425433596         4.567362596462139    
       19.36100000     925.4953162895362         4.588626781247456    
       19.36480000     924.9967246642519         4.612564978806493    
       19.36860000     928.4718186383056         4.614398769800990    
       19.37240000     926.0030312659760         4.568218741778629    
       19.37620000     922.7585452736514         4.569375448267254    
       19.38000000     923.3595243452113         4.566123331501305    
       19.38380000     927.2778810224182         4.578791750753903    
       19.38760000     930.6437005078111         4.585400858861769    
       19.39140000     927.3489694993692         4.567928445282631    
       19.39520000     928.4846750560502         4.552899336350163    
       19.39900000     926.2665584507118         4.592694167755095    
       19.40280000     935.6973009253391         4.623838194274742    
       19.40660000     920.1465200277661         4.543880453584462    
       19.41040000     928.6041440736597         4.557958278569897    
       19.41420000     937.7989724191801         4.614605622614168    
       19.41800000     930.2249910120792         4.606577561874312    
       19.42180000     930.1871281773005         4.591061811904476    
       19.42560000     927.5474032871628         4.563533422140130    
       19.42940000     931.4416943801623         4.577210096192473    
       19.43320000     926.5728003315510         4.557605454352544    
       19.43700000     929.7903114677924         4.555354563373659    
       19.44080000     926.9566791071239         4.551969404559465    
       19.44460000     930.3489450325779         4.587410855658318    
       19.44840000     926.9674607908591         4.573334797974913    
       19.45220000     931.8586629631584         4.590193896251836    
       19.45600000     936.6154435287901         4.601416608774652    
       19.45980000     935.3004180004530         4.596283950944549    
       19.46360000     934.9411957419511         4.597834372227842    
       19.46740000     938.6860035233605         4.611552015966238    
       19.47120000     934.0299032868602         4.581350146049226    
       19.47500000     937.1534766093072         4.575211174272177    
       19.47880000     943.3818673531121         4.607837487271146    
       19.48260000     946.8702213305238         4.636308119311028    
       19.48640000     940.2775932433848         4.643587612748568    
       19.49020000     941.5428254221770         4.621996780607390    
       19.49400000     937.8960496158215         4.631504565364563    
       19.49780000     933.4409206873992         4.603592130987687    
       19.50160000     933.8061752889232         4.595200749254191    
       19.50540000     936.9507675398143         4.597217606843012    
       19.50920000     938.7915065630431         4.637957077063695    
       19.51300000     931.9761563390973         4.598872468093803    
       19.51680000     931.1424166351959         4.577804045455382    
       19.52060000     928.3411832321588         4.560589446219798    
       19.52440000     929.9566425680346         4.565602327570555    
       19.52820000     929.7109076511655         4.568526155733142    
       19.53200000     924.7433170078039         4.568850081350934    
       19.53580000     927.5649046217193         4.570910139630749    
       19.53960000     923.3280885051017         4.564866416629357    
       19.54340000     924.9770920388968         4.548477896859366    
       19.54720000     930.1550556039047         4.585556872460788    
       19.55100000     930.6853976063694         4.580899954277596    
       19.55480000     930.7116781225601         4.563379906395422    
       19.55860000     929.0437384208235         4.564800386858611    
       19.56240000     931.8692075470394         4.582561553134353    
       19.56620000     936.9037026553721         4.603989933297754    
       19.57000000     934.9326812008186         4.599180324774236    
       19.57380000     934.5358864938436         4.604442527139650    
       19.57760000     936.1941511316317         4.591654239381423    
       19.58140000     934.7680838363445         4.583064632210749    
       19.58520000     941.3889236630313         4.596504308544816    
       19.58900000     944.6471867232295         4.632953143019098    
       19.59280000     945.8028807619331         4.640550200347653    
       19.59660000     943.1987690251893         4.614807302555088    
       19.60040000     948.9782304747366         4.652873515609544    
       19.60420000     950.4782638028587         4.665137149079283    
       19.60800000     954.2766946450409         4.691018770633424    
       19.61180000     953.2350584173936         4.668539995536009    
       19.61560000     957.5535220347380         4.657591177183145    
       19.61940000     961.8932482195630         4.696640923280702    
       19.62320000     962.4048382947224         4.715663448522705    
       19.62700000     958.8651220074157         4.707037518058273    
       19.63080000     960.3706110671225         4.716011610015030    
       19.63460000     961.9547654735570         4.706611974142126    
       19.63840000     961.2682688727949         4.678261268567480    
       19.64220000     960.2723031128502         4.702068238309502    
       19.64600000     956.7754166434285         4.690855661072951    
       19.64980000     956.4929880186146         4.686591966314901    
       19.65360000     958.7498185459443         4.681967217689155    
       19.65740000     947.6046368895202         4.654434228127953    
       19.66120000     951.3103237686314         4.683746641869720    
       19.66500000     946.2748268897802         4.673970965431126    
       19.66880000     946.5239749811095         4.655668379859095    
       19.67260000     947.9740589456278         4.636968043691944    
       19.67640000     936.9483164035393         4.619804795353383    
       19.68020000     934.7854306989015         4.596958493310495    
       19.68400000     938.7389891330955         4.601742136883982    
       19.68780000     935.4281550434167         4.592014368249687    
       19.69160000     934.6828872243110         4.592521573627097    
       19.69540000     929.6214010585866         4.570452316586802    
       19.69920000     932.2991445211289         4.589159390920223    
       19.70300000     930.2100954353851         4.602452572613844    
       19.70680000     929.3291662109522         4.568167817500917    
       19.71060000     931.3447912931663         4.560096541852670    
       19.71440000     929.9293027637091         4.584581857006460    
       19.71820000     931.7414959840780         4.598873352007631    
       19.72200000     936.5183207080499         4.596794801029659    
       19.72580000     932.4086171923030         4.567768724059872    
       19.72960000     936.4305156361480         4.575065128211029    
       19.73340000     931.5671556675048         4.563337173044774    
       19.73720000     937.3565292987553         4.581967239398721    
       19.74100000     929.1531795981299         4.543070368143519    
       19.74480000     934.0257779443889         4.586217190583376    
       19.74860000     928.3503642345075         4.556415548833175    
       19.75240000     931.0688292658366         4.570925688350107    
       19.75620000     926.8678917345419         4.564425238951817    
       19.76000000     921.0192906170189         4.529489523408800    
       19.76380000     915.7375072221553         4.512515292052745    
       19.76760000     921.1533085768450         4.539617097489814    
       19.77140000     917.7665190043024         4.521248633126739    
       19.77520000     918.0062982950645         4.501583821073495    
       19.77900000     912.3785574964411         4.490024621799130    
       19.78280000     908.8863074442005         4.497117712871231    
       19.78660000     902.9909384408271         4.494420679713721    
       19.79040000     898.8900515593969         4.461662327050574    
       19.79420000     902.5678113882942         4.475731963758346    
       19.79800000     899.4312378425683         4.521743524590609    
       19.80180000     897.5683223173942         5.054481657487297    
       19.80560000     900.1969595023926         4.453553018491993    
       19.80940000     894.9350169082791         4.448323256227566    
       19.81320000     892.2156749683530         4.417986320085493    
       19.81700000     893.6578690321423         4.426927458790057    
       19.82080000     891.2959640301635         4.416919851208319    
       19.82460000     886.9594155977495         4.385690807317506    
       19.82840000     891.2762055776855         4.404312357131430    
       19.83220000     894.3451468575372         4.433284924598657    
       19.83600000     889.3676160265577         4.422967404300532    
       19.83980000     893.8132328298146         4.452306564723284    
       19.84360000     892.1027382098711         4.430693571973711    
       19.84740000     888.6977034713964         4.446390096236108    
       19.85120000     887.2070536003130         4.419006236488597    
       19.85500000     890.5720578444350         4.404339906418111    
       19.85880000     896.3644348955760         4.452358594089785    
       19.86260000     893.7786489446372         4.443661538332380    
       19.86640000     895.1267915223544         4.436002007431440    
       19.87020000     897.0275563283450         4.444563909177192    
       19.87400000     903.0122042205542         4.481167810470265    
       19.87780000     902.7509461239249         4.459779108310229    
       19.88160000     901.3495923538168         4.444161276437212    
       19.88540000     902.6249220856980         4.449211550363573    
       19.88920000     904.2573320000851         4.478405583530058    
       19.89300000     906.5501881608766         4.475677582474090    
       19.89680000     906.5842151212231         4.477635910380260    
       19.90060000     911.6848517066114         4.520260078386482    
       19.90440000     913.2661968848489         4.524773302423365    
       19.90820000     915.4140636319580         4.539467143152859    
       19.91200000     917.1738557180686         4.528289441762768    
       19.91580000     916.9540912319160         4.510520335939683    
       19.91960000     922.1892017536584         4.546080091401715    
       19.92340000     923.4660353220291         4.549354861726023    
       19.92720000     925.4825394901305         4.568839169279725    
       19.93100000     924.6456019528537         4.580556174678907    
       19.93480000     927.9372932167666         4.575840862440070    
       19.93860000     932.5407662555590         4.560403194170568    
       19.94240000     930.6370488231606         4.584675124641062    
       19.94620000     934.7112308350103         4.594471019597569    
       19.95000000     938.5411369417083         4.605257110470521    
       19.95380000     940.2396802300800         4.617681222229052    
       19.95760000     943.2172227689578         4.646796614463919    
       19.96140000     947.6227474481386         4.674223195432232    
       19.96520000     938.6890649114771         4.640512400378626    
       19.96900000     941.9620713796032         4.639215103773073    
       19.97280000     943.1059975347067         4.607090772422921    
       19.97660000     941.6601033019750         4.634727728683826    
       19.98040000     947.6482243874361         4.655386964894896    
       19.98420000     947.8389561111105         4.643241315349222    
       19.98800000     944.1252910348072         4.630336220522899    
       19.99180000     946.3607753686500         4.621923638612084    
       19.99560000     945.1961626378815         4.628511073623058    
       19.99940000     949.5225815092263         4.645587019443576    
       20.00320000     947.5472312224643         5.176778175888656    
       20.00700000     942.4007584909087         4.743550592638820    
       20.01080000     946.3672623966957         4.652054247788333    
       20.01460000     946.9150072216737         4.638701934339259    
       20.01840000     945.9776872152709         4.643826565112395    
       20.02220000     944.6983876473832         4.616737053515116    
       20.02600000     945.2728412615118         4.619712409176237    
       20.02980000     949.5265441426957         4.617266829857480    
       20.03360000     945.3419437833878         4.602596547127241    
       20.03740000     947.6418378427875         4.606005813263878    
       20.04120000     954.6124845667059         4.642770940996686    
       20.04500000     958.6104956003394         4.658374148377624    
       20.04880000     958.3519566963090         4.645437902014767    
       20.05260000     961.2963546121246         4.635238206157405    
       20.05640000     961.2064084612961         5.340080451110983    
       20.06020000     961.9610640699070         5.401264083490022    
       20.06400000     970.7249755394078         5.436776728456860    
       20.06780000     970.3053201764181         5.455694045933148    
       20.07160000     976.4202363016112         5.460538493452403    
       20.07540000     982.3021583163268         5.455130854460784    
       20.07920000     985.0153037635516         5.494950032759113    
       20.08300000     991.2164681880615         5.550824099495223    
       20.08680000     985.4862348987207         5.534800152700813    
       20.09060000     986.6847785916675         5.531737835547236    
       20.09440000     992.9816983952016         5.557851685074529    
       20.09820000     996.8576344354602         5.557202746739343    
       20.10200000     996.6079481511132         6.754513830907324    
       20.10580000     1000.932073846183         5.619442248311779    
       20.10960000     990.6397207098432         5.521529431569854    
       20.11340000     986.2630100723941         5.485240075786407    
       20.11720000     983.7917049245788         5.499551157342205    
       20.12100000     979.6141424452422         5.491037811629001    
       20.12480000     972.8056842396393         5.659844573842076    
       20.12860000     976.0802500677243         5.440418924269965    
       20.13240000     966.8387093542293         5.412148674284261    
       20.13620000     963.4293021772424         5.421214532569677    
       20.14000000     950.6342758423722         5.378447254363355    
       20.14380000     951.4058277148579         5.351780312752596    
       20.14760000     948.5016419600171         5.392577541400401    
       20.15140000     942.9557327603775         5.344418244435301    
       20.15520000     931.4375530358171         5.249691017766705    
       20.15900000     932.1404576841434         5.306395439531946    
       20.16280000     933.2403536671025         5.290997197137903    
       20.16660000     925.4426499739473         5.255472776253470    
       20.17040000     922.0831038422018         5.229652429823422    
       20.17420000     919.3190248327309         5.221470228239352    
       20.17800000     913.7653835311593         5.192831724326397    
       20.18180000     911.8555026994380         5.167312684341688    
       20.18560000     911.7586633300845         5.156517356521683    
       20.18940000     905.7398783271232         5.156789500778170    
       20.19320000     900.6078526541862         5.123746528494777    
       20.19700000     901.6029204474819         5.140502325783284    
       20.20080000     901.3278201835149         5.163004921614952    
       20.20460000     896.3974126311618         5.139509375106834    
       20.20840000     892.8235896118407         5.140268154709188    
       20.21220000     887.0143911734240         5.078507197078780    
       20.21600000     887.1197106049684         5.081274764072898    
       20.21980000     885.3995396027218         5.086349671974979    
       20.22360000     883.8889021131241         5.067032424185768    
       20.22740000     882.4412824238639         5.063155785867981    
       20.23120000     883.7669816468280         5.083401623113318    
       20.23500000     881.3660168456872         5.055932468612627    
       20.23880000     879.6673807010072         5.019737446314101    
       20.24260000     877.8453954714799         5.048152306066107    
       20.24640000     871.1034497618695         5.034197010183598    
       20.25020000     871.7176889121738         4.297712004775082    
       20.25400000     877.0718141071550         4.351350729346299    
       20.25780000     870.9295822340744         4.334614418130849    
       20.26160000     874.2844189135502         4.354768723740874    
       20.26540000     875.2063237449005         4.366562804359091    
       20.26920000     873.1392386086652         4.344293077977829    
       20.27300000     870.6662877801638         4.330122884700564    
       20.27680000     871.2953384220451         4.346117988756964    
       20.28060000     871.5938294292667         4.352389814704466    
       20.28440000     871.4477375800682         4.357859728393234    
       20.28820000     870.3627131414681         4.351087503902103    
       20.29200000     868.2938713846505         4.328379580393752    
       20.29580000     868.4983417735556         4.318969234968725    
       20.29960000     865.2825748564353         4.314939410693209    
       20.30340000     866.4398888847408         4.687160709508052    
       20.30720000     869.8483305662782         4.563793761935703    
       20.31100000     870.1286086065987         4.352908773768974    
       20.31480000     868.5885225369258         4.354553199419540    
       20.31860000     869.5653048401130         4.329499723235099    
       20.32240000     869.9548137672663         4.327244803468203    
       20.32620000     866.9811834972105         4.301833807150063    
       20.33000000     870.8498493106792         4.325969419292213    
       20.33380000     861.3190062493645         4.284378574109089    
       20.33760000     863.5869211927759         4.287337484755272    
       20.34140000     867.4340846479510         4.325432551683509    
       20.34520000     861.7684592512242         4.277935297314164    
       20.34900000     866.9638408251760         4.290322374951080    
       20.35280000     872.2469263603292         4.294927017309091    
       20.35660000     865.8089757160112         4.768638464535718    
       20.36040000     868.8932659882041         4.979821466018209    
       20.36420000     868.4442581054598         4.983314221358058    
       20.36800000     867.8392734106121         4.979444484032612    
       20.37180000     871.9852037432190         4.978801060989967    
       20.37560000     875.3205154220482         4.978971251355847    
       20.37940000     869.0458188093329         4.968957595024129    
       20.38320000     874.5963605233336         5.028387135949382    
       20.38700000     874.3197026843501         5.033652662646545    
       20.39080000     878.6018196399359         5.050341079394852    
       20.39460000     881.7286362324022         5.054333279904331    
       20.39840000     890.3971123421418         5.138048271795888    
       20.40220000     886.6435310333123         6.065545134156165    
       20.40600000     885.9187045964823         5.057116748317194    
       20.40980000     886.6736738251723         5.057427855707268    
       20.41360000     886.7916284061885         5.051222138197888    
       20.41740000     890.9756103714166         5.091023311875084    
       20.42120000     894.4642215578735         5.095835177213448    
       20.42500000     891.2652143183385         5.071583921635928    
       20.42880000     894.2747985437694         5.079953821297246    
       20.43260000     897.3591641068010         5.108572600133924    
       20.43640000     901.1648051252383         5.137318894892832    
       20.44020000     900.0446228817416         5.145074098976519    
       20.44400000     901.9598232212977         5.157073029326710    
       20.44780000     902.9689523154658         5.174866609152192    
       20.45160000     910.0308337826528         5.177723787066678    
       20.45540000     907.9236436460457         5.138173823620746    
       20.45920000     907.0484345681532         5.169425509616093    
       20.46300000     908.4952555502521         5.168224001622224    
       20.46680000     911.5482788576533         5.190919167286578    
       20.47060000     910.7475655281755         5.173866673727638    
       20.47440000     913.2284267832071         5.180455672540515    
       20.47820000     907.2329292787424         5.140383887605789    
       20.48200000     910.8145041540822         5.168695234301419    
       20.48580000     912.6983262739022         5.164427347626783    
       20.48960000     912.6527529653039         5.176198269174708    
       20.49340000     912.0247246266938         5.183041694854572    
       20.49720000     913.3414376313045         5.194084029890670    
       20.50100000     912.8230039564612         5.185398696114375    
       20.50480000     914.5600948912763         5.208232612279700    
       20.50860000     913.1833097026979         5.205271634972830    
       20.51240000     911.7380628736767         5.181137415753605    
       20.51620000     917.7137503127609         5.230829343918196    
       20.52000000     918.3309943234425         5.228828728388588    
       20.52380000     917.1787155888524         5.210914538508964    
       20.52760000     912.0332129404986         5.197945044769040    
       20.53140000     911.7844079668705         5.206073695283359    
       20.53520000     914.2800957632041         5.176706717510105    
       20.53900000     919.1664599575076         5.206328605927588    
       20.54280000     915.5291969617334         5.222213575878087    
       20.54660000     910.3693716525486         5.206947965180739    
       20.55040000     911.5400858300925         4.538546483632860    
       20.55420000     916.7158998733643         4.478524820940595    
       20.55800000     909.2157615263211         4.466002028538620    
       20.56180000     912.2585638489368         4.499935750343951    
       20.56560000     906.9021113396931         4.475310597278037    
       20.56940000     902.5448831998272         4.437953841424071    
       20.57320000     895.0833684976168         4.429247677893179    
       20.57700000     893.7535931014110         4.426503884204919    
       20.58080000     889.4534009819596         4.400325525588018    
       20.58460000     889.3039780390452         4.422702364576245    
       20.58840000     878.1089755027249         4.373115447013737    
       20.59220000     880.9993206406202         4.367614287972192    
       20.59600000     877.3685235165689         4.367804018238855    
       20.59980000     876.7446753873584         4.350501054629592    
       20.60360000     876.6103068487191         4.817316022874557    
       20.60740000     879.1321581476387         4.518973878000866    
       20.61120000     870.3751141060430         4.351960467343602    
       20.61500000     876.6349788644931         4.376388617965999    
       20.61880000     876.3775849905653         4.358936467425169    
       20.62260000     870.3702093065538         4.310903177734488    
       20.62640000     874.6454375432343         4.341852518084153    
       20.63020000     868.3350651668766         4.315324714755929    
       20.63400000     864.0841407595933         4.297539873902620    
       20.63780000     872.7210485028304         4.334129469431759    
       20.64160000     860.4817407188229         4.307729234363892    
       20.64540000     865.4121295240382         4.286867143771022    
       20.64920000     865.5226066427256         4.292244431888993    
       20.65300000     864.9541740871139         4.267932948243547    
       20.65680000     865.2460646366601         4.891567292073254    
       20.66060000     868.5633846831618         4.969422423813533    
       20.66440000     866.2369887957168         4.965114987428926    
       20.66820000     861.3207963989704         4.953299885125102    
       20.67200000     864.1044366125957         4.950743898867884    
       20.67580000     865.7022141531378         4.950655281459572    
       20.67960000     866.0854883809869         4.963973927232444    
       20.68340000     863.8101337835822         4.982257118802932    
       20.68720000     866.9577272670895         4.987955415571961    
       20.69100000     870.4807398040456         5.014982549221998    
       20.69480000     864.6663230402103         4.947072036804835    
       20.69860000     865.0504181247690         5.059502710203459    
       20.70240000     863.6709022095678         5.802154940220045    
       20.70620000     870.9530044921675         4.965311616990693    
       20.71000000     870.9210377549440         4.982862871350203    
       20.71380000     875.3175868899446         5.004583475202814    
       20.71760000     873.0947965407439         4.997279412985186    
       20.72140000     870.8002035826780         4.987910206893889    
       20.72520000     867.4671213087377         4.954613582908831    
       20.72900000     869.4867497087619         4.982482551160745    
       20.73280000     866.8086117891557         4.985672604060011    
       20.73660000     870.2266670715999         4.988982782294002    
       20.74040000     871.1178985077984         4.978361194223013    
       20.74420000     870.7705714827729         4.997017388832051    
       20.74800000     869.4798349834989         5.005694084676964    
       20.75180000     869.7283641777439         4.988022863332029    
       20.75560000     867.2992930350435         4.961823624945581    
       20.75940000     865.6369411151477         4.969835297696006    
       20.76320000     866.9966867313233         4.985855567898971    
       20.76700000     864.9160738951576         4.982071349800317    
       20.77080000     864.6744289772377         4.966047738005587    
       20.77460000     861.4908760443672         4.957111717909577    
       20.77840000     859.8768094450734         4.946703145488828    
       20.78220000     859.3395928751617         4.940612878961954    
       20.78600000     857.0806037321873         4.925762899107910    
       20.78980000     856.5424711798075         4.947292032947420    
       20.79360000     854.8839195842022         4.929258391458605    
       20.79740000     849.6460260073026         4.906028436126333    
       20.80120000     849.7796251760841         4.914392961295508    
       20.80500000     843.7415807670061         4.890981301875201    
       20.80880000     843.4195311461685         4.881173672502939    
       20.81260000     844.2556662990457         4.900373417350260    
       20.81640000     844.0088964191378         4.911564023873575    
       20.82020000     844.1541933784337         4.927007338126018    
       20.82400000     840.6441732083741         4.877664776723079    
       20.82780000     838.7068180402998         4.858073380587682    
       20.83160000     839.7642975467335         4.871655379421227    
       20.83540000     840.4536905954793         4.875917258161781    
       20.83920000     838.4859314377516         4.855512704441146    
       20.84300000     832.5835684500150         4.861953326204469    
       20.84680000     834.6215848953761         4.856837980809673    
       20.85060000     836.9815809519877         4.187956912192229    
       20.85440000     839.6792201360585         4.195678404875813    
       20.85820000     834.7368650743307         4.188779808723577    
       20.86200000     838.9445755174763         4.210222077247701    
       20.86580000     834.1003848143851         4.191452720730908    
       20.86960000     832.8028933159195         4.159174991024527    
       20.87340000     835.8961472398022         4.206842959109933    
       20.87720000     832.4326234652507         4.213064425769790    
       20.88100000     832.3115558443047         4.178436104972760    
       20.88480000     836.1739898840535         4.209527528173260    
       20.88860000     828.9339790501606         4.191413219282511    
       20.89240000     832.4617755534607         4.189467280068584    
       20.89620000     835.9722614762061         4.217671107650996    
       20.90000000     828.6265167106631         4.189300614529555    
       20.90380000     830.0083753196503         4.671624070557872    
       20.90760000     832.7769815416463         4.297323664031993    
       20.91140000     830.6606079254749         4.218655162758909    
       20.91520000     835.8203506837173         4.210488496890227    
       20.91900000     831.5068621976499         4.198512239776424    
       20.92280000     828.3285402571330         4.168983496846669    
       20.92660000     830.5480847758236         4.180099476671147    
       20.93040000     830.4831683278302         4.171523477312508    
       20.93420000     833.2520041293851         4.175188079339776    
       20.93800000     835.3642167304453         4.193577447672845    
       20.94180000     836.1704229281380         4.228041814401002    
       20.94560000     834.1755876905054         4.176070207195299    
       20.94940000     833.1534540642560         4.181478227110843    
       20.95320000     831.1236590014634         4.149718435336243    
       20.95700000     833.1564681935714         4.809536381070282    
       20.96080000     831.3246484196779         4.832493156403513    
       20.96460000     833.8136839090324         4.841373535984568    
       20.96840000     832.0939284009615         4.833454959364977    
       20.97220000     835.3830514781962         4.849880784022747    
       20.97600000     831.1099442194798         4.815171850829579    
       20.97980000     830.3748517761252         4.819942463653471    
       20.98360000     835.2633973569316         4.841777000533528    
       20.98740000     833.0527025300840         4.835457742478972    
       20.99120000     830.8567640721158         4.812894099786456    
       20.99500000     830.7096202457481         4.798268774461568    
       20.99880000     830.1427384808682         4.766483563483593    
       21.00260000     830.9843465631241         4.803950659711528    
       21.00640000     829.3171368923223         4.806522746141321    
       21.01020000     828.4509328599994         4.815471007061344    
       21.01400000     829.3271136920232         4.824108019498336    
       21.01780000     830.3805131139655         4.814710469609276    
       21.02160000     830.9456373544321         4.822856494222970    
       21.02540000     827.7707357736605         4.814798414491264    
       21.02920000     826.2851584441554         4.836863427933447    
       21.03300000     829.0373107727959         4.865649817351951    
       21.03680000     825.1272644810306         4.812791539207025    
       21.04060000     825.2217757989779         4.790342647535521    
       21.04440000     825.9147541517698         4.810204194510459    
       21.04820000     826.4175522327798         4.795902302922340    
       21.05200000     831.7098791490839         4.838729445383726    
       21.05580000     833.0018548054819         4.830739228797647    
       21.05960000     829.0781891886447         4.804033942111248    
       21.06340000     827.8127527002421         4.827900341456151    
       21.06720000     828.9832069454625         4.844858927572518    
       21.07100000     833.5395398083433         4.859392685373224    
       21.07480000     829.1353160778320         4.836854851251799    
       21.07860000     828.3223130008071         4.824250563092667    
       21.08240000     831.0660112857040         4.856223175046694    
       21.08620000     832.6755644849678         4.842280156269202    
       21.09000000     833.5769307439149         4.842327791307057    
       21.09380000     833.2119151578747         4.839540304008715    
       21.09760000     829.3317982719193         4.815905155215167    
       21.10140000     829.5560341906955         4.821492117243166    
       21.10520000     831.6442788422783         4.835979789631414    
       21.10900000     833.8655737563718         4.835238696057816    
       21.11280000     832.9707421415245         4.861977927445682    
       21.11660000     836.2795729601226         4.895516374764281    
       21.12040000     838.4628119803901         4.881478915175611    
       21.12420000     838.4356997136715         4.871711412056239    
       21.12800000     839.1998430464300         4.879802127973416    
       21.13180000     842.9883787018304         4.892533678390953    
       21.13560000     839.1569659081614         4.880345962699092    
       21.13940000     842.6954113595374         4.921741223498499    
       21.14320000     839.3239592441865         4.888006604337312    
       21.14700000     841.4734158515330         4.898277902141340    
       21.15080000     841.1402430708929         4.175839942937804    
       21.15460000     843.7637400534716         4.219692349651234    
       21.15840000     841.5381420745192         4.229724073748046    
       21.16220000     841.1100452136080         4.212295747945621    
       21.16600000     849.4597130404032         4.234963516820084    
       21.16980000     848.2123134434562         4.227108205426208    
       21.17360000     848.2461721149407         4.261688295132966    
       21.17740000     849.4614185801195         4.270135903410109    
       21.18120000     848.2901529657631         4.249102571225424    
       21.18500000     852.7705401382555         4.265320074607048    
       21.18880000     850.3215234970817         4.270168785580732    
       21.19260000     853.2170256291630         4.280141246397093    
       21.19640000     851.9753125452463         4.274429595853792    
       21.20020000     855.0803185414721         4.339445321209969    
       21.20400000     854.5413071609778         4.282397138683620    
       21.20780000     862.5837690238059         4.315378378174139    
       21.21160000     862.7097190461673         4.302428984141067    
       21.21540000     860.1136359552586         4.281812325287281    
       21.21920000     864.7721250578048         4.317418546785383    
       21.22300000     864.1873040075117         4.294815474876443    
       21.22680000     866.4484541712636         4.293072514872396    
       21.23060000     870.2336500597743         4.311306136992394    
       21.23440000     874.2111180070264         4.337607940902442    
       21.23820000     874.2555046632477         4.342539503321884    
       21.24200000     878.1900329304706         4.374155782177962    
       21.24580000     881.8147536123788         4.360023068830627    
       21.24960000     881.4253009696605         4.376285474815589    
       21.25340000     884.1241358229026         4.380126439249595    
       21.25720000     888.4498864234653         4.384047950938881    
       21.26100000     891.4546051462748         4.400953923971297    
       21.26480000     892.8343392433191         4.411050319474531    
       21.26860000     889.6701369663788         4.387814866597591    
       21.27240000     893.0955566754561         4.407671447529303    
       21.27620000     890.5165487311995         4.392220743526730    
       21.28000000     889.2212063821736         4.400339042474790    
       21.28380000     891.5228566288237         4.406210522225378    
       21.28760000     890.9947709543779         4.402585258228737    
       21.29140000     890.8724014229781         4.388971535546804    
       21.29520000     889.4309329099128         4.383488892416494    
       21.29900000     890.5928640618069         4.357025096597187    
       21.30280000     887.1305683808203         4.367637880779213    
       21.30660000     884.3195713935058         4.376859916929233    
       21.31040000     887.1597787294959         4.401087700043942    
       21.31420000     882.1581647167778         4.383261667159867    
       21.31800000     883.5853457649926         4.376032925322882    
       21.32180000     883.6349934179516         4.361953295742611    
       21.32560000     883.7810635361261         4.367447422549622    
       21.32940000     885.0211886318632         4.401505861284753    
       21.33320000     882.9227857707471         4.405169081051183    
       21.33700000     879.6893523652241         4.373501670900703    
       21.34080000     884.4533247462708         4.371247335153336    
       21.34460000     888.2341754633845         4.388325231871151    
       21.34840000     888.6010196453439         4.391124517422055    
       21.35220000     886.4150172026831         4.402313735090529    
       21.35600000     883.8858237027147         4.385193120624749    
       21.35980000     887.7371138727200         4.391232646677088    
       21.36360000     889.0287603422396         4.408995359170746    
       21.36740000     889.1021970844591         4.418088780762865    
       21.37120000     892.7496005670337         4.429769089741544    
       21.37500000     894.7692263623660         4.438400795573565    
       21.37880000     898.7505451843315         4.440041808178010    
       21.38260000     896.2397720484520         4.438340190539112    
       21.38640000     901.1680220160480         4.443474234938707    
       21.39020000     904.5564894748619         4.463217400699434    
       21.39400000     909.4818596040352         4.475304171564169    
       21.39780000     913.5544657444065         4.488458504437952    
       21.40160000     916.9332694864067         4.509018351193908    
       21.40540000     922.0126078601589         4.527871402573767    
       21.40920000     927.2115615168137         4.540912892741571    
       21.41300000     935.3179213448867         4.598158344689539    
       21.41680000     945.8336022151610         4.645769294181432    
       21.42060000     943.7498130690398         4.628866563426539    
       21.42440000     947.9365454691355         4.616206311615372    
       21.42820000     952.0802334077385         4.639712318217880    
       21.43200000     949.7383124654974         4.640694882809042    
       21.43580000     954.7345604514605         5.113378121328094    
       21.43960000     960.0944958756297         4.892110691581097    
       21.44340000     960.6347554745702         4.702498170447648    
       21.44720000     956.5955147340385         4.681445148036298    
       21.45100000     960.0872123037796         4.701790018647033    
       21.45480000     958.2150773408702         4.679596563471639    
       21.45860000     952.5977429378817         4.671261519175907    
       21.46240000     953.4671935168983         4.646040573881132    
       21.46620000     954.6585264573450         4.646890414276371    
       21.47000000     947.8840653924846         4.617667813187660    
       21.47380000     943.4815814117312         4.641716781029111    
       21.47760000     939.0770128761530         4.620180015672208    
       21.48140000     933.8348371167898         4.556996364258842    
       21.48520000     926.4936368059524         4.547615107923197    
       21.48900000     921.0601033018362         4.557376054978181    
       21.49280000     924.6796873270818         4.562228094621694    
       21.49660000     918.7892125687555         4.541623168419152    
       21.50040000     914.0013848818464         4.517599894515762    
       21.50420000     914.0353679171665         4.526851331872185    
       21.50800000     912.3086662916656         4.505271906341873    
       21.51180000     905.0144663296355         4.466383639654067    
       21.51560000     905.1543916336741         4.452053348639712    
       21.51940000     905.5185486885632         4.467779295687926    
       21.52320000     896.7466631282317         4.438898399902072    
       21.52700000     893.7405323515408         4.406312803517370    
       21.53080000     890.9930510696744         4.391240416865866    
       21.53460000     891.2222071658523         4.417593295158297    
       21.53840000     885.8712276302689         4.404400166130669    
       21.54220000     882.4032567548151         4.400202465188533    
       21.54600000     879.4445623555662         4.361817979853737    
       21.54980000     880.7952840659444         4.405899443350789    
       21.55360000     875.6449539714642         4.365388495565965    
       21.55740000     872.4714003334720         4.338059720907983    
       21.56120000     872.2322030261441         4.356962120491115    
       21.56500000     874.5707688247765         4.371798401983012    
       21.56880000     876.8526741155856         4.366762928764856    
       21.57260000     870.4606888197661         4.350273891352699    
       21.57640000     869.2581718936183         4.333934663527518    
       21.58020000     865.7733032504400         4.331880208551602    
       21.58400000     866.1218868272833         4.314250517291135    
       21.58780000     871.6062763998759         4.345074113635805    
       21.59160000     866.6946472394201         4.296935689474615    
       21.59540000     870.0862881427956         4.322697418852039    
       21.59920000     867.9173385297355         4.295406710220013    
       21.60300000     865.7751498989062         4.316568562818174    
       21.60680000     870.1703280380161         4.332077547311737    
       21.61060000     873.6612472002817         4.366223054857735    
       21.61440000     876.1539287664775         4.361168660853866    
       21.61820000     875.9648126758726         4.363439433760044    
       21.62200000     873.2005393830677         4.343172450483533    
       21.62580000     873.1395686397221         4.348276244091638    
       21.62960000     878.3794226071171         4.390347473801184    
       21.63340000     883.9770286060919         4.413834418374745    
       21.63720000     887.5329459951274         4.431818598306146
[truncated: 1,855,373 more chars]
